# Supplementary material for: Herpetological phylogeographic analyses support a Miocene focal point of Himalayan uplift and biological diversification
Source: PubMed Central journal article supplement (PMC8433089; doi:10.1093/nsr/nwaa263), 2020-10-21
Supplement: nwaa263_supplemental_file.pdf [file nwaa263_supplemental_file.pdf]

Supplementary Materials for

**Herpetological Phylogeographic Analyses Support a Miocene Focal Point of Himalayan Uplift and Biological Diversification**

Wei Xu<sup>†,‡</sup>, Wen-Jie Dong<sup>†,‡</sup>, Ting-Ting Fu<sup>†,‡</sup>, Wei Gao<sup>†,‡</sup>, Chen-Qi Lu<sup>†,‡</sup>, Fang Yan<sup>†</sup>, Yun-He Wu<sup>†,‡</sup>, Ke Jiang<sup>†</sup>, Jie-Qiong Jin<sup>†</sup>, Hong-Man Chen<sup>†</sup>, Ya-Ping Zhang<sup>†,||</sup>, David M. Hillis<sup>§,\*</sup>, and Jing Che<sup>†,||,\*</sup>

Correspondence to: chej@mail.kiz.ac.cn; dhillis@austin.utexas.edu.

**This PDF file includes:**

Methods and Materials

Supplementary Text

Fig. S1 to S2

Table S1 to S5

Data S1 to S8

References

## Methods and Materials

### Data collection

The complete dataset for phylogenetic analyses is presented in **DataS5**. Of the included 1,628 species, 184 are distributed in the Himalaya, and 127 are endemic (limited to the Himalaya). Those fourteen families met the following criteria, as suggested in Xing and Ree [1]: (1) the clade contains substantial numbers of species distributed in the Himalaya; (2) sufficient molecular data were available or obtainable to infer a phylogeny that covered majority taxonomic diversity and geographic range of this clade; and (3) sufficient fossil data were available for molecular clock calibration of the clade's diversification. Thirty-five well-resolved clades with Himalaya species of those families are selected for biogeographic analysis (**Fig. 3**). We integrated closely related clades of the same family into a combined family-level tree, instead of building trees for each subgroup separately. This maximized use of shared fossil calibrations among genera; otherwise, further splitting of the trees would have reduced available fossil calibration points and thus increased the uncertainty of age estimates.

The DNA dataset for phylogenetic analysis included 29 loci with 8,156 sequences (**DataS5**). We collected 391 new sequences from 121 species, and downloaded the remaining sequences from GenBank (through August 2019). Total genomic DNA was extracted using a standard phenol/chloroform method [2] for the 121 species newly sampled in this study. Amplification consisted of an initial denaturation step at 95°C for 5 min, followed by 35 cycles of denaturation at 95°C for 1 min, annealing for 1 min, followed by extension at 72°C for 1 min. The final extension was set at 72°C for 10 min. PCR products were purified with a Gel Extraction Mini Kit (Watson BioTechnologies, Shanghai, China), and then sequenced in both directions with BigDye Terminator Cycle Sequencing Kit (v.2.0, Applied Biosystems, Foster City, CA, USA) using an ABI PRISM 3730 DNA Analyzer (Applied Biosystems). Primers and conditions for PCR amplification are listed in **Table S3**.

Our study was approved by the ethics committees of the Kunming Institute of Zoology, Chinese Academy of Sciences, China (permission for this study is BBCJ-2014-001).

### Time calibrated phylogeny

All sequences were aligned using ClustalW with default settings as implemented in MEGA X [3]. Multiple loci were concatenated using SequenceMatrix [4]. The assembled supermatrices for

each family were used to construct phylogenetic trees under the maximum likelihood (ML) criterion, using IQTREE [5] in the IQTREE web server [6]. We used ModelFinder [7] to determine the best substitution model for each gene partition (**Table S4**). We calculated bootstrap proportions and other branch-support metrics (all based on 1,000 replicates) using the UFBoot [8] algorithm in IQTREE 1.5.5, UFBoot2 [9] in IQTREE 1.6.1, aLRT [10], and its nonparametric equivalent SH-aLRT [11]. The Bayesian measures of branch support reduce the bias of bootstrap support values in large datasets [12].

Fourteen time-calibrated trees were constructed using MCMCTREE [13]. The inferred IQTREE tree was used as the reference topology. We first used BASEML program (in PAML) to estimate the mean substitution rate under GTR + I substitution model, using a strict molecular clock. We assigned each tree a root age based on a published large-scale tree [14,15] or fossil records. The average estimated rates were then used to set the prior of overall substitution rate (*rgene gamma*) and rate-drift parameter (*sigma2 gamma*). We used 40 well-established fossil ages to calibrate the date of nodes (fossil details are presented in **Table S5** and graphically shown in **Data S6**). The minimum and maximum bounds of constraints were treated as soft, with a 2.5% probability that those bounds could be violated. The first 5,000,000 generations of the MCMC sample were treated as burn-in; we then then sampled every 1,000 generations for another 10,000,000 generations to create a sample of 10,000 solutions. We executed this analysis twice to check for convergence in the solution set, starting from randomly generated seeds.

Comparison between prior and posterior distributions are needed in any Bayesian analysis to determine whether signal is coming from the data *per se* or from the prior selection, especially for parameters of interest [16]. We compared time estimates of calibration nodes based on prior-only and data-informed distributions. Prior distributions were obtained with calibrations only, using no sequence data. Other parameters were the same in both analyses. All results were processed in R v4.0.1 [17] and were visualized using ggplot2 v3.3.1 [18].

### **Definition of biogeographic regions**

We analyzed nine biogeographic regions. The Himalayan Mountain ranges region, following Boos and Kuang [19] and Ding et al. [20], is bounded to the west by Nanga Parbat, to the north by the northernmost bend of Indus river, and to the east by Namcha Barwa and the great bend of the Yarlung Tsangpo River. It is bordered on the northwest by the Karakoram and the Hindu

Kush ranges, and to the north the Himalaya are separated from the Tibetan Plateau by a 50–60 km wide tectonic valley called the Indus–Tsangpo Suture. To the south the arc of the Himalaya is ringed by the low Indo-Gangetic Plain. We included species distributed in northeast India, northern Myanmar and Ganges Delta in the Himalayan Mountain region because they are adjacent and have a similar mountain environment. Importantly, we strictly differentiate the Himalaya from high Tibetan Plateau due to their clear geological distinction in the spirit of Spicer [21]. The other regions we included were temperate/boreal East Asia (the eastern boreal part of Russia and temperate regions of eastern Asia, including Japan and Taiwan); Central-West Asia (including Pakistan, Uzbekistan, Tajikistan, and the Arabian Peninsula countries); Southeast Asia (including tropical regions of China, Malesia, and Papuaasia); Australasia (Australia, New Zealand, and the southwestern Pacific); South Asia (south of the Himalaya, including Sri Lanka); Africa; Europe; and the Americas (North America, Central America, and South America).

### **Ancestral range reconstruction**

We reconstructed ancestral ranges as follows. First, to infer the differences between the dynamics of *in situ* diversification versus dispersal-associated diversification, we classified species into either Himalayan (state "A") or non-Himalayan (state "B") regions, based on their current known distributions (species that occurs both inside and outside of the Himalayan region were coded "AB"). We then fit six models (DEC, DEC+j, DIVALIKE, DIVALIKE+j, BAYAREALIKE, BAYAREALIKE+j) implemented in BioGeoBEARS [22] using *model-test* function [23] to test which models should be the best based on AICc weight. The best model was applied to infer the probabilities for the ancestral range of each node in the tree as being Himalayan or non-Himalayan. We also classified species into the nine regions to provide additional information about dispersal between the Himalaya and other adjacent regions.

### **Phylogeographic analysis: Local diversification and dispersal**

Biotic assembly for a given region is the process of species accumulation, which is composed of both colonization via regional dispersal as well as *in situ* lineage diversification. Although extinction may affect overall diversification rate, observed *in situ* lineage diversification is all that can be estimated from extant taxa.

Using the ancestral range analysis, we categorized several biogeographic events on the phylogenetic tree (**Fig. S1**)[24]. We identified “*in situ* diversification events” whenever the ancestral node for a group of descendant Himalayan species was reconstructed in the Himalaya; the date of that ancestral node was taken as the date of the *in situ* diversification events. In contrast, we identified dispersal between areas if the range of a descendant node differed from the reconstructed range of the ancestral node. More specifically, a biogeographic event was identified as “dispersal into the Himalaya” in cases in which the ancestral range was reconstructed as other than the Himalaya, whereas the descendant node was in the Himalaya. In the case of biogeographic events associated with dispersal, the date of the dispersal event was recorded as the date of the older (ancestral) node. Some events could not be assigned unambiguously to either *in situ* diversification events or dispersal events because of ambiguity in the ancestral node assignments. In all cases, we refer to a node as being either a tip (that is, extant species) or an internal node (ancestral species). Some diversification events from clades outside our selected clades, but possibly related to the Himalaya, are separately defined as “ambiguous events” (see details in **Supplementary Text**).

We estimated the maximal number of observed dispersal events per Ma (MDisE) [25] or *in situ* diversification events per Ma (MDivE, extension of MDE) to infer general patterns of *in situ* diversification and biotic interchange. These MDE rates were calculated by summing potential dispersal or *in situ* diversification events over all data sets through time using time slices of one million years (based on the divergence time credibility intervals given in **Table S1** and **Table S2**). All dispersal and *in situ* diversification events (based on different nodes in the tree) were treated as independent. In addition to estimating events from the MCMCTREE results, we also conducted an MDE analysis based on results from BEAST to consider method sensitivity (see more details in **Supplementary Text**).

We estimated inflection points in the MDE curves from 67 Ma to the present to characterize major changes in diversification rates over time (using the *e.divisive* function of R-package ‘ecp’) [26, 27, 28]. We resampled 1,000 bootstrap pseudoreplicates from the raw credibility intervals (used for inferring the MDisE and MDivE rates above) using the *sample* function R 3.3.2 (**Supplementary Text**). We repeated the calculations to find the MDE origination, peaks, and inflection points for each bootstrap pseudosample, and used these samples to calculate

confidence intervals for the MDE curve attributes presented in **Table 2**(details see **Supplementary Text**).

### **Bootstrap analyses**

The inflection points were identified using the *e.divisive* function in R-package *ecp* with the following parameters: maximum number of random permutations = 1,000, significance level = 0.001, k=2 (maximum possible inflection points are set to 2, corresponding with possible inflection points in those geological models), minimum number of observations between changes = 10 Ma. We estimated the origination, peak, and inflection points from each bootstrap pseudosample and repeated this calculation for 1,000 bootstrap pseudoreplicates (**Data S7**). We sorted these samples ascending and calculate the 99% confidence intervals of MDE curve attributes.

### **Testing the effect of “potential Himalayan species”**

Some species are excluded from our analysis due to their questionable distribution in the Himalaya. Most of these are widespread species, with no molecular data published from Himalayan samples since their original description. We consider their presence in the Himalaya uncertain. Therefore, we considered them as non-Himalayan species in our biogeographic analysis, but labeled them “potential Himalayan species” (details see **Data S8**). It is possible that some of them might be confirmed as true Himalayan species in the future. Therefore, to examine the effects of their exclusion in our analyses, we used molecular data from regions outside the Himalaya and integrated these species into our MDE analysis to check if these exclusions changed any of our results.

### **Supplemental Text**

#### **Defining “ambiguous events” and effect**

We selected well-resolved clades for analysis. Those clades with Himalayan species but poorly-resolved or with too few species (fewer than three species) were excluded (*Ophiophagus* for example, has only one species, *Ophiophagus hannah*), to minimize bias from extinction or poor sampling. Furthermore, Himalayan species in poorly-resolved clades (e.g., *Sphenomorphus*) have a highly uncertain phylogenetic position, so they were also excluded. The MDE trend of those

“ambiguous events” (**Fig. 4**) shows that they occupy only small fraction of all events. Generally, those events are likely dispersal events if those clades are truly monotypic taxa. Adding these events would lead to a similar trend but a somewhat earlier increased dispersal MDE curve.

### **Effect of “potential Himalayan species”**

When “potential Himalayan species” were included in the analysis, the trends remain unchanged (**Fig. S2a**). The origination, peak, and time period of rapid increase were all unchanged. The integration of those species only changed the peak value of dispersal, which made it almost equivalent in scale with *in situ* diversification (**Fig. S2a**).

### **Repeat validation using BEAST**

To test the robustness of the divergence time estimation, we added BEAST v 1.10.4 [29]. We used PartitionFinder2 [30] to find the best substitution model for each gene partition under BIC. The best-fit partitioning schemes determined by PartitionFinder2 was applied to the BEAST. We used the same calibration of MCMCTREE. BEAST analyses were run for 100 million generations, with samples taken every 10,000 generations under an uncorrelated lognormal relaxed clock and a Yule tree prior. Stationarity was assessed using TRACER 1.7.0 [31] with ESS values > 200 taken as evidence for convergence. Maximum clade credibility trees were obtained using TREEANNOTATOR 2.4.1 [32] applying a burn-in of 25%.

Biogeographic events detected from BEAST trees are generally similar to those obtained with MCMCTREE, including 133 *in situ* diversification events (mean age with 95% confidence interval: 16.15 Ma [21.90 Ma – 11.17 Ma]), 88 dispersal events (mean age with 95% confidence interval: 23.28 Ma [32.37 Ma – 16.12 Ma]), and 12 ambiguous events (mean age with 95% confidence interval: 30.29 Ma [42.17 Ma – 20.61 Ma]). A few questionable events are excluded due to their large 95% confidence intervals (some are more than 50 Ma). The MDE trend is also similar to the results with MCMCTREE (**Fig. 4**)

█ Himalayan *in situ* diversification  
█ Dispersal into the Himalaya  
█ Diversification unrelated to the Himalaya  
 A: The Himalaya  
 B: Regions outside the Himalaya

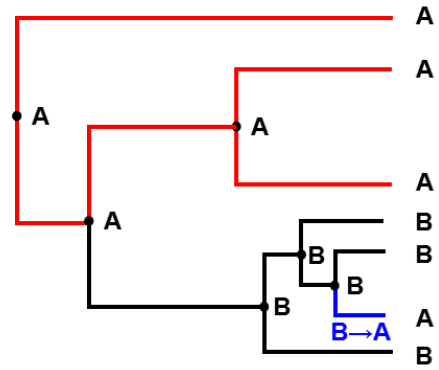

**Fig. S1.** Identification of *in situ* diversification events and dispersal events. An example phylogenetic tree is shown with the ancestral areas depicted for each node. A: the Himalaya; B: non-Himalayan regions. Red branches represent *in situ* diversification events, blue branches represent dispersal events, and black branches were not related to Himalayan diversification.



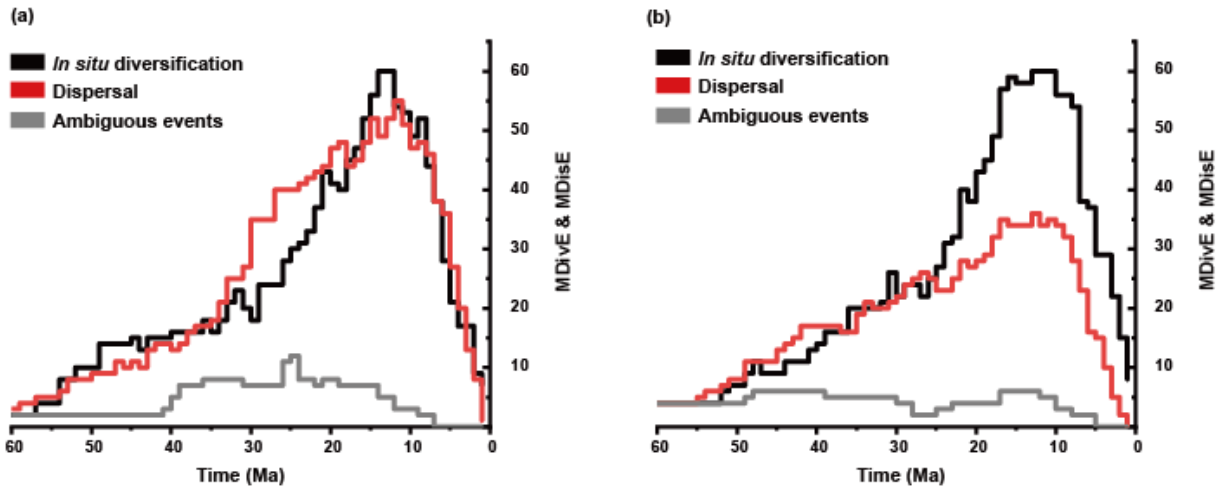

**Fig. S2.** (a): The rates of *in situ* diversification and dispersal of the Himalayan herpetofauna through time after adding those “potential Himalayan species.” MDivE = maximal number of observed *in situ* diversification events per Ma. MDisE = maximal number of observed dispersal events per Ma. (b): The rates of *in situ* diversification and dispersal of the Himalayan herpetofauna through time from BEAST. MDivE = maximal number of observed *in situ* diversification events per Ma. MDisE = maximal number of observed dispersal events per Ma.

**Table S1.**

Inferred *in situ* diversification events and dispersal events related to the Himalaya summarized from **Data S3**. Respective clade, median, upper and lower bounds of the 95% intervals for the age.

| <b>Clades</b> | <b>Median (Myr)</b> | <b>Upper (Myr)</b> | <b>Lower (Myr)</b> | <b>Events</b>                  |
|---------------|---------------------|--------------------|--------------------|--------------------------------|
| Gekkonidae    | 9.11                | 12.86              | 6.04               | <i>In situ</i> diversification |
| Gekkonidae    | 9.11                | 12.86              | 6.04               | <i>In situ</i> diversification |
| Gekkonidae    | 20.26               | 25.86              | 15.81              | <i>In situ</i> diversification |
| Gekkonidae    | 20.26               | 25.86              | 15.81              | <i>In situ</i> diversification |
| Gekkonidae    | 23.39               | 29.38              | 18.91              | Dispersal                      |
| Gekkonidae    | 25.58               | 31.08              | 20.48              | <i>In situ</i> diversification |
| Gekkonidae    | 25.58               | 31.08              | 20.48              | <i>In situ</i> diversification |
| Gekkonidae    | 30.01               | 35.82              | 24.58              | <i>In situ</i> diversification |
| Gekkonidae    | 30.01               | 35.82              | 24.58              | <i>In situ</i> diversification |
| Gekkonidae    | 31.49               | 37.28              | 26.08              | <i>In situ</i> diversification |
| Gekkonidae    | 31.49               | 37.28              | 26.08              | <i>In situ</i> diversification |
| Gekkonidae    | 22.87               | 28.25              | 18.07              | <i>In situ</i> diversification |
| Gekkonidae    | 22.87               | 28.25              | 18.07              | <i>In situ</i> diversification |
| Gekkonidae    | 18.94               | 23.8               | 14.65              | <i>In situ</i> diversification |
| Gekkonidae    | 18.94               | 23.8               | 14.65              | <i>In situ</i> diversification |
| Gekkonidae    | 9.18                | 14                 | 5.34               | <i>In situ</i> diversification |
| Gekkonidae    | 16.19               | 20.9               | 12.08              | <i>In situ</i> diversification |
| Gekkonidae    | 16.19               | 20.9               | 12.08              | <i>In situ</i> diversification |
| Gekkonidae    | 6.2                 | 10.89              | 2.71               | <i>In situ</i> diversification |
| Gekkonidae    | 6.2                 | 10.89              | 2.71               | <i>In situ</i> diversification |
| Gekkonidae    | 33.61               | 39.63              | 27.83              | <i>In situ</i> diversification |
| Gekkonidae    | 36.49               | 42.83              | 30.42              | <i>In situ</i> diversification |
| Gekkonidae    | 36.49               | 42.83              | 30.42              | <i>In situ</i> diversification |
| Gekkonidae    | 3.64                | 5.93               | 2.02               | <i>In situ</i> diversification |
| Gekkonidae    | 3.64                | 5.93               | 2.02               | <i>In situ</i> diversification |
| Gekkonidae    | 41.81               | 48.53              | 35.29              | <i>In situ</i> diversification |
| Gekkonidae    | 41.81               | 48.53              | 35.29              | <i>In situ</i> diversification |
| Gekkonidae    | 37.76               | 44.67              | 31.11              | <i>In situ</i> diversification |
| Gekkonidae    | 26.05               | 32.91              | 19.55              | <i>In situ</i> diversification |
| Gekkonidae    | 17.13               | 23.38              | 11.83              | <i>In situ</i> diversification |
| Gekkonidae    | 44.87               | 53.52              | 38.96              | <i>In situ</i> diversification |
| Gekkonidae    | 44.87               | 53.52              | 38.96              | <i>In situ</i> diversification |
| Gekkonidae    | 55.41               | 66.68              | 44.65              | <i>In situ</i> diversification |
| Gekkonidae    | 55.41               | 66.68              | 44.65              | <i>In situ</i> diversification |

|                |       |       |       |                                |
|----------------|-------|-------|-------|--------------------------------|
| Gekkonidae     | 23.31 | 32.9  | 15.45 | <i>In situ</i> diversification |
| Gekkonidae     | 23.31 | 32.9  | 15.45 | <i>In situ</i> diversification |
| Gekkonidae     | 21.56 | 28.31 | 16.09 | <i>In situ</i> diversification |
| Gekkonidae     | 21.56 | 28.31 | 16.09 | <i>In situ</i> diversification |
| Gekkonidae     | 17.67 | 24.34 | 12.25 | <i>In situ</i> diversification |
| Gekkonidae     | 17.67 | 24.34 | 12.25 | <i>In situ</i> diversification |
| Gekkonidae     | 18.35 | 25.04 | 12.7  | <i>In situ</i> diversification |
| Gekkonidae     | 18.35 | 25.04 | 12.7  | <i>In situ</i> diversification |
| Gekkonidae     | 23.65 | 29.72 | 18.08 | Dispersal                      |
| Gekkonidae     | 15.42 | 22.4  | 9.49  | Dispersal                      |
| Gekkonidae     | 35.27 | 42.79 | 28.2  | Dispersal                      |
| Gekkonidae     | 14.04 | 21.89 | 7.8   | Dispersal                      |
| Gekkonidae     | 32.26 | 40.69 | 24.52 | Ambiguous events               |
| Gekkonidae     | 49.54 | 60.03 | 40.56 | Ambiguous events               |
| Gekkonidae     | 55.08 | 65.99 | 45.65 | Ambiguous events               |
| Gekkonidae     | 14.98 | 20.55 | 10.19 | Dispersal                      |
| Dicroglossidae | 11.19 | 16.66 | 6.74  | Dispersal                      |
| Dicroglossidae | 19.4  | 27.58 | 11.79 | Dispersal                      |
| Dicroglossidae | 12.09 | 16.54 | 8.53  | Dispersal                      |
| Dicroglossidae | 9.47  | 14.06 | 5.59  | Dispersal                      |
| Dicroglossidae | 9.47  | 14.06 | 5.59  | Dispersal                      |
| Dicroglossidae | 24.22 | 30.22 | 18.78 | Dispersal                      |
| Dicroglossidae | 0.45  | 1.12  | 0.08  | <i>In situ</i> diversification |
| Dicroglossidae | 0.45  | 1.12  | 0.08  | <i>In situ</i> diversification |
| Dicroglossidae | 3.4   | 5.25  | 2.03  | Dispersal                      |
| Dicroglossidae | 3.4   | 5.25  | 2.03  | <i>In situ</i> diversification |
| Dicroglossidae | 6.36  | 8.63  | 4.48  | <i>In situ</i> diversification |
| Dicroglossidae | 6.36  | 8.63  | 4.48  | <i>In situ</i> diversification |
| Dicroglossidae | 4.55  | 6.77  | 2.79  | <i>In situ</i> diversification |
| Dicroglossidae | 4.55  | 6.77  | 2.79  | <i>In situ</i> diversification |
| Dicroglossidae | 8.54  | 11.1  | 6.34  | <i>In situ</i> diversification |
| Dicroglossidae | 8.54  | 11.1  | 6.34  | <i>In situ</i> diversification |
| Dicroglossidae | 1.67  | 3.27  | 0.62  | <i>In situ</i> diversification |
| Dicroglossidae | 4.51  | 6.97  | 2.54  | <i>In situ</i> diversification |
| Dicroglossidae | 14.35 | 17.57 | 11.63 | Dispersal                      |
| Dicroglossidae | 45.83 | 53.34 | 37.33 | Dispersal                      |
| Bufo           | 13.38 | 20.38 | 7.56  | Dispersal                      |
| Bufo           | 6.71  | 10.42 | 3.9   | Dispersal                      |
| Bufo           | 14.25 | 18.62 | 10.59 | Dispersal                      |
| Bufo           | 14.85 | 19.77 | 10.27 | Dispersal                      |
| Bufo           | 16.69 | 24.28 | 9.23  | Ambiguous events               |

|              |       |       |       |                                |
|--------------|-------|-------|-------|--------------------------------|
| Bufonidae    | 1.74  | 3.6   | 0.65  | <i>In situ</i> diversification |
| Bufonidae    | 1.74  | 3.6   | 0.65  | <i>In situ</i> diversification |
| Bufonidae    | 7.53  | 12.06 | 4.32  | Dispersal                      |
| Bufonidae    | 27.82 | 35.18 | 19.97 | Ambiguous events               |
| Pareidae     | 51.32 | 66.28 | 37.72 | Dispersal                      |
| Megophryidae | 25.73 | 29.68 | 21.2  | Dispersal                      |
| Megophryidae | 12.95 | 21.07 | 6.09  | <i>In situ</i> diversification |
| Megophryidae | 12.95 | 21.07 | 6.09  | <i>In situ</i> diversification |
| Megophryidae | 8.52  | 12.57 | 5.25  | Dispersal                      |
| Megophryidae | 10.26 | 14.45 | 6.69  | <i>In situ</i> diversification |
| Megophryidae | 11.63 | 15.78 | 8.06  | <i>In situ</i> diversification |
| Megophryidae | 11.63 | 15.78 | 8.06  | <i>In situ</i> diversification |
| Megophryidae | 8.63  | 13.31 | 4.23  | <i>In situ</i> diversification |
| Megophryidae | 13.31 | 17.69 | 9.56  | <i>In situ</i> diversification |
| Megophryidae | 13.31 | 17.69 | 9.56  | <i>In situ</i> diversification |
| Megophryidae | 11.98 | 16.58 | 8.01  | <i>In situ</i> diversification |
| Megophryidae | 11.98 | 16.58 | 8.01  | <i>In situ</i> diversification |
| Megophryidae | 9.86  | 14.34 | 5.98  | <i>In situ</i> diversification |
| Megophryidae | 9.86  | 14.34 | 5.98  | <i>In situ</i> diversification |
| Megophryidae | 4.82  | 8.97  | 2     | <i>In situ</i> diversification |
| Megophryidae | 4.82  | 8.97  | 2     | <i>In situ</i> diversification |
| Megophryidae | 16.16 | 20.85 | 11.69 | <i>In situ</i> diversification |
| Megophryidae | 16.16 | 20.85 | 11.69 | <i>In situ</i> diversification |
| Megophryidae | 20.48 | 24.77 | 16.15 | <i>In situ</i> diversification |
| Megophryidae | 20.48 | 24.77 | 16.15 | <i>In situ</i> diversification |
| Megophryidae | 16.48 | 21.24 | 11.93 | <i>In situ</i> diversification |
| Megophryidae | 16.48 | 21.24 | 11.93 | <i>In situ</i> diversification |
| Megophryidae | 12.9  | 17.65 | 8.64  | <i>In situ</i> diversification |
| Megophryidae | 12.9  | 17.65 | 8.64  | <i>In situ</i> diversification |
| Megophryidae | 10.12 | 15.06 | 5.71  | <i>In situ</i> diversification |
| Megophryidae | 10.12 | 15.06 | 5.71  | <i>In situ</i> diversification |
| Megophryidae | 10.59 | 15.52 | 6.15  | <i>In situ</i> diversification |
| Megophryidae | 10.59 | 15.52 | 6.15  | <i>In situ</i> diversification |
| Megophryidae | 22.6  | 26.81 | 18.17 | <i>In situ</i> diversification |
| Megophryidae | 25.85 | 29.62 | 21.55 | Dispersal                      |
| Megophryidae | 5.14  | 8.22  | 2.96  | Dispersal                      |
| Megophryidae | 11.17 | 15.84 | 7.5   | <i>In situ</i> diversification |
| Megophryidae | 12.74 | 17.45 | 9.03  | <i>In situ</i> diversification |
| Megophryidae | 12.74 | 17.45 | 9.03  | <i>In situ</i> diversification |
| Megophryidae | 11.14 | 15.99 | 7.78  | <i>In situ</i> diversification |
| Megophryidae | 11.14 | 15.99 | 7.78  | <i>In situ</i> diversification |

|              |       |       |       |                                |
|--------------|-------|-------|-------|--------------------------------|
| Megophryidae | 10.43 | 14.91 | 6.81  | <i>In situ</i> diversification |
| Megophryidae | 10.43 | 14.91 | 6.81  | <i>In situ</i> diversification |
| Megophryidae | 7.47  | 11.54 | 4.29  | <i>In situ</i> diversification |
| Megophryidae | 7.47  | 11.54 | 4.29  | <i>In situ</i> diversification |
| Megophryidae | 5.07  | 8.72  | 2.43  | <i>In situ</i> diversification |
| Megophryidae | 14.27 | 19.49 | 10.18 | Dispersal                      |
| Megophryidae | 19.77 | 26.03 | 14.11 | Dispersal                      |
| Megophryidae | 18.12 | 24.42 | 11.92 | Dispersal                      |
| Viperidae    | 3.73  | 6.16  | 2     | Dispersal                      |
| Viperidae    | 15.37 | 20.32 | 10.91 | Dispersal                      |
| Viperidae    | 24.86 | 29.43 | 20.49 | Dispersal                      |
| Viperidae    | 9.75  | 12.41 | 7.49  | Dispersal                      |
| Viperidae    | 18.51 | 22.32 | 15.08 | Dispersal                      |
| Viperidae    | 22.68 | 26.94 | 18.74 | Dispersal                      |
| Agamidae     | 13.88 | 22.51 | 7.76  | <i>In situ</i> diversification |
| Agamidae     | 13.88 | 22.51 | 7.76  | <i>In situ</i> diversification |
| Agamidae     | 51.25 | 59.79 | 40.79 | Dispersal                      |
| Agamidae     | 34.2  | 42.93 | 25.99 | Dispersal                      |
| Agamidae     | 12.87 | 17.36 | 9.18  | Dispersal                      |
| Agamidae     | 31.86 | 38.17 | 26.06 | Dispersal                      |
| Agamidae     | 54.67 | 62.68 | 46.62 | Dispersal                      |
| Agamidae     | 43.83 | 56.1  | 31.97 | <i>In situ</i> diversification |
| Agamidae     | 43.83 | 56.1  | 31.97 | <i>In situ</i> diversification |
| Agamidae     | 37.67 | 51.35 | 25.64 | <i>In situ</i> diversification |
| Agamidae     | 37.67 | 51.35 | 25.64 | <i>In situ</i> diversification |
| Agamidae     | 40.63 | 53.48 | 29    | <i>In situ</i> diversification |
| Agamidae     | 40.63 | 53.48 | 29    | <i>In situ</i> diversification |
| Agamidae     | 34.77 | 48.74 | 23.56 | <i>In situ</i> diversification |
| Agamidae     | 34.77 | 48.74 | 23.56 | <i>In situ</i> diversification |
| Agamidae     | 38.66 | 52.33 | 26.49 | Dispersal                      |
| Agamidae     | 9.04  | 12.97 | 5.9   | Dispersal                      |
| Agamidae     | 22.01 | 33.17 | 12.63 | <i>In situ</i> diversification |
| Agamidae     | 22.01 | 33.17 | 12.63 | <i>In situ</i> diversification |
| Anguidae     | 27.97 | 37.27 | 19.92 | Dispersal                      |
| Scincidae    | 38.51 | 44.75 | 31.65 | Ambiguous events               |
| Scincidae    | 32.27 | 39.52 | 24.87 | Ambiguous events               |
| Scincidae    | 32.27 | 39.52 | 24.87 | Ambiguous events               |
| Scincidae    | 51.42 | 56.62 | 44.32 | Dispersal                      |
| Scincidae    | 19.81 | 26.46 | 13.57 | Dispersal                      |
| Scincidae    | 30.49 | 36.42 | 24.97 | Dispersal                      |
| Scincidae    | 26.62 | 33.98 | 18.79 | Dispersal                      |

|                   |       |       |       |                                |
|-------------------|-------|-------|-------|--------------------------------|
| Scincidae         | 30.49 | 38.71 | 21.96 | Ambiguous events               |
| Scincidae         | 25.32 | 32.66 | 18.61 | Dispersal                      |
| Rhacophoridae     | 5.48  | 9.36  | 2.64  | Dispersal                      |
| Rhacophoridae     | 41.45 | 46.72 | 35.66 | Dispersal                      |
| Rhacophoridae     | 17.99 | 27.88 | 10.57 | <i>In situ</i> diversification |
| Rhacophoridae     | 17.99 | 27.88 | 10.57 | <i>In situ</i> diversification |
| Rhacophoridae     | 6.61  | 9.59  | 4     | Dispersal                      |
| Rhacophoridae     | 8.34  | 11.69 | 4.87  | Dispersal                      |
| Rhacophoridae     | 12.99 | 17.29 | 8.8   | Dispersal                      |
| Rhacophoridae     | 9.21  | 14.69 | 5.01  | Dispersal                      |
| Rhacophoridae     | 23.34 | 29.64 | 17.42 | Dispersal                      |
| Rhacophoridae     | 5.02  | 7.27  | 3.25  | Dispersal                      |
| Rhacophoridae     | 5.02  | 7.27  | 3.25  | Dispersal                      |
| Rhacophoridae     | 14.4  | 19.98 | 9.14  | Dispersal                      |
| Rhacophoridae     | 26.97 | 33.33 | 20.29 | Dispersal                      |
| Rhacophoridae     | 43.42 | 49.03 | 36.74 | Dispersal                      |
| Rhacophoridae     | 9.16  | 13.39 | 5.29  | <i>In situ</i> diversification |
| Rhacophoridae     | 9.16  | 13.39 | 5.29  | <i>In situ</i> diversification |
| Rhacophoridae     | 11.98 | 15.9  | 8.33  | Dispersal                      |
| Rhacophoridae     | 15.79 | 21.03 | 10.33 | Dispersal                      |
| Ranidae           | 14.49 | 20.45 | 9.08  | Dispersal                      |
| Ranidae           | 27.57 | 32.88 | 21.7  | Dispersal                      |
| Ranidae           | 5.46  | 10.92 | 1.8   | Dispersal                      |
| Ranidae           | 36.76 | 41.27 | 32.36 | Dispersal                      |
| Ranidae           | 7.66  | 14.04 | 2.74  | <i>In situ</i> diversification |
| Ranidae           | 12.05 | 17.64 | 7.16  | <i>In situ</i> diversification |
| Ranidae           | 12.05 | 17.64 | 7.16  | <i>In situ</i> diversification |
| Ranidae           | 7.1   | 10.73 | 4.25  | <i>In situ</i> diversification |
| Ranidae           | 7.1   | 10.73 | 4.25  | <i>In situ</i> diversification |
| Ranidae           | 9.44  | 13.42 | 6.33  | <i>In situ</i> diversification |
| Ranidae           | 9.44  | 13.42 | 6.33  | <i>In situ</i> diversification |
| Ranidae           | 10.64 | 14.78 | 7.28  | <i>In situ</i> diversification |
| Ranidae           | 10.64 | 14.78 | 7.28  | <i>In situ</i> diversification |
| Ranidae           | 21.42 | 26.82 | 16.62 | Dispersal                      |
| Ranidae           | 14.78 | 21.79 | 8.7   | Dispersal                      |
| Ceratobatrachidae | 19.9  | 28.49 | 12.83 | <i>In situ</i> diversification |
| Ceratobatrachidae | 19.9  | 28.49 | 12.83 | <i>In situ</i> diversification |
| Ceratobatrachidae | 13.79 | 20.82 | 8.12  | <i>In situ</i> diversification |
| Ceratobatrachidae | 13.79 | 20.82 | 8.12  | <i>In situ</i> diversification |
| Ceratobatrachidae | 3.26  | 8.19  | 0.5   | <i>In situ</i> diversification |
| Ceratobatrachidae | 3.26  | 8.19  | 0.5   | <i>In situ</i> diversification |

|            |       |       |       |                                |
|------------|-------|-------|-------|--------------------------------|
| Elapidae   | 17.97 | 23.62 | 13.04 | Dispersal                      |
| Elapidae   | 12.76 | 18.54 | 7.92  | Dispersal                      |
| Elapidae   | 9.81  | 19.88 | 3.47  | Dispersal                      |
| Elapidae   | 11.47 | 16.7  | 7.52  | Dispersal                      |
| Elapidae   | 31.65 | 39.12 | 22.2  | Ambiguous events               |
| Colubridae | 7.91  | 12.59 | 4.38  | Dispersal                      |
| Colubridae | 11.32 | 15.26 | 8.01  | Dispersal                      |
| Colubridae | 19.02 | 24.32 | 14.01 | Dispersal                      |
| Colubridae | 15.81 | 20.21 | 11.82 | Dispersal                      |
| Colubridae | 10.82 | 16.57 | 6.65  | Dispersal                      |
| Colubridae | 5.84  | 11.07 | 2.49  | Dispersal                      |
| Colubridae | 21.18 | 28.78 | 13.82 | Dispersal                      |
| Colubridae | 31.08 | 37.01 | 25.39 | Dispersal                      |
| Colubridae | 31.77 | 38.51 | 24.19 | Ambiguous events               |
| Colubridae | 13.91 | 19.65 | 8.78  | Dispersal                      |
| Colubridae | 4.17  | 7.05  | 2.26  | Dispersal                      |
| Colubridae | 9.29  | 14.7  | 5.29  | Dispersal                      |
| Colubridae | 5.64  | 8.69  | 3.32  | Dispersal                      |
| Colubridae | 17.98 | 22.69 | 13.59 | Dispersal                      |
| Colubridae | 31.92 | 37.42 | 26.76 | Dispersal                      |
| Colubridae | 19.44 | 25.24 | 14.04 | Ambiguous events               |
| Colubridae | 19.44 | 25.24 | 14.04 | Ambiguous events               |
| Colubridae | 38.81 | 44.8  | 32.94 | Dispersal                      |
| Colubridae | 15.93 | 22.27 | 10.71 | <i>In situ</i> diversification |
| Colubridae | 15.93 | 22.27 | 10.71 | <i>In situ</i> diversification |
| Colubridae | 19.01 | 25.49 | 13.51 | <i>In situ</i> diversification |
| Colubridae | 19.01 | 25.49 | 13.51 | <i>In situ</i> diversification |
| Colubridae | 13.33 | 20.07 | 7.54  | Ambiguous events               |
| Colubridae | 13.33 | 20.07 | 7.54  | Ambiguous events               |
| Colubridae | 18.7  | 25.53 | 12.51 | Ambiguous events               |
| Colubridae | 18.7  | 25.53 | 12.51 | Ambiguous events               |
| Colubridae | 10.59 | 16.55 | 6.3   | Dispersal                      |

---

**Table S2.**

Inferred dispersal events between the Himalaya and surrounding regions summarized from **Data S4**. Respective clade, median, upper and lower bounds of the 95% intervals for the age of events in million years before present (Ma), as used for the calculation of the maximal number of dispersal (MDisE) per Ma. The arrows indicate dispersal direction.

| <b>Clades</b>  | <b>Median (Myr)</b> | <b>Upper (Myr)</b> | <b>Lower (Myr)</b> | <b>Events</b>                    |
|----------------|---------------------|--------------------|--------------------|----------------------------------|
| Gekkonidae     | 15.42               | 22.4               | 9.49               | South Asia → The Himalaya        |
| Gekkonidae     | 14.98               | 20.55              | 10.19              | Southeast Asia → The Himalaya    |
| Dicroglossidae | 19.4                | 27.58              | 11.79              | South Asia → The Himalaya        |
| Dicroglossidae | 6.37                | 9.83               | 3.82               | South Asia → The Himalaya        |
| Dicroglossidae | 18.11               | 27.84              | 10.43              | South Asia → The Himalaya        |
| Bufoidae       | 13.38               | 20.38              | 7.56               | Southeast Asia → The Himalaya    |
| Bufoidae       | 16.69               | 24.28              | 9.23               | South Asia → The Himalaya        |
| Bufoidae       | 7.53                | 12.06              | 4.32               | Europe → The Himalaya            |
| Pareidae       | 51.32               | 66.28              | 37.72              | Southeast Asia → The Himalaya    |
| Megophryidae   | 25.73               | 29.68              | 21.2               | Southeast Asia → The Himalaya    |
| Megophryidae   | 22.6                | 26.81              | 18.17              | Southeast Asia → The Himalaya    |
| Megophryidae   | 1.12                | 2.56               | 0.35               | East Asia → The Himalaya         |
| Megophryidae   | 29.59               | 33.6               | 24.8               | Southeast Asia → The Himalaya    |
| Megophryidae   | 18.12               | 24.42              | 11.92              | Southeast Asia → The Himalaya    |
| Viperidae      | 15.37               | 20.32              | 10.91              | Southeast Asia → The Himalaya    |
| Viperidae      | 12.94               | 17.62              | 8.73               | Southeast Asia → The Himalaya    |
| Viperidae      | 17.27               | 21.87              | 13.07              | Southeast Asia → The Himalaya    |
| Viperidae      | 9.75                | 12.41              | 7.49               | Southeast Asia → The Himalaya    |
| Viperidae      | 12.65               | 16.81              | 9.1                | Southeast Asia → The Himalaya    |
| Viperidae      | 22.68               | 26.94              | 18.74              | Southeast Asia → The Himalaya    |
| Agamidae       | 51.25               | 59.79              | 40.79              | South Asia → The Himalaya        |
| Agamidae       | 16.34               | 23.39              | 10.3               | Southeast Asia → The Himalaya    |
| Agamidae       | 12.87               | 17.36              | 9.18               | South Asia → The Himalaya        |
| Agamidae       | 54.67               | 62.68              | 46.62              | Southeast Asia → The Himalaya    |
| Agamidae       | 38.66               | 52.33              | 26.49              | Southeast Asia → The Himalaya    |
| Agamidae       | 9.04                | 12.97              | 5.9                | East Asia → The Himalaya         |
| Agamidae       | 55.25               | 64.82              | 43.6               | Central-West Asia → The Himalaya |
| Anguillidae    | 27.97               | 37.27              | 19.92              | Southeast Asia → The Himalaya    |
| Scincidae      | 40.35               | 48.48              | 31.3               | Central-West Asia → The Himalaya |
| Scincidae      | 19.81               | 26.46              | 13.57              | South Asia → The Himalaya        |



|               |       |       |       |                               |
|---------------|-------|-------|-------|-------------------------------|
| Scincidae     | 30.49 | 36.42 | 24.97 | Southeast Asia → The Himalaya |
| Scincidae     | 26.62 | 33.98 | 18.79 | Southeast Asia → The Himalaya |
| Scincidae     | 25.32 | 32.66 | 18.61 | Southeast Asia → The Himalaya |
| Rhacophoridae | 5.48  | 9.36  | 2.64  | Southeast Asia → The Himalaya |
| Rhacophoridae | 41.45 | 46.72 | 35.66 | Southeast Asia → The Himalaya |
| Rhacophoridae | 12.99 | 17.29 | 8.8   | Southeast Asia → The Himalaya |
| Rhacophoridae | 9.21  | 14.69 | 5.01  | Southeast Asia → The Himalaya |
| Rhacophoridae | 23.34 | 29.64 | 17.42 | Southeast Asia → The Himalaya |
| Rhacophoridae | 2.89  | 5.34  | 1.05  | Southeast Asia → The Himalaya |
| Rhacophoridae | 5.02  | 7.27  | 3.25  | Southeast Asia → The Himalaya |
| Rhacophoridae | 14.4  | 19.98 | 9.14  | Southeast Asia → The Himalaya |
| Rhacophoridae | 43.42 | 49.03 | 36.74 | Southeast Asia → The Himalaya |
| Rhacophoridae | 11.98 | 15.9  | 8.33  | Southeast Asia → The Himalaya |
| Rhacophoridae | 15.79 | 21.03 | 10.33 | Southeast Asia → The Himalaya |
| Ranidae       | 27.57 | 32.88 | 21.7  | Southeast Asia → The Himalaya |
| Ranidae       | 36.76 | 41.27 | 32.36 | Southeast Asia → The Himalaya |
| Ranidae       | 7.51  | 11.42 | 4.01  | Southeast Asia → The Himalaya |
| Ranidae       | 33.4  | 38.58 | 28.32 | Southeast Asia → The Himalaya |
| Ranidae       | 21.42 | 26.82 | 16.62 | Southeast Asia → The Himalaya |
| Elapidae      | 12.78 | 18.31 | 8.32  | Southeast Asia → The Himalaya |
| Elapidae      | 9.81  | 19.88 | 3.47  | Southeast Asia → The Himalaya |
| Colubridae    | 7.91  | 12.59 | 4.38  | Southeast Asia → The Himalaya |
| Colubridae    | 9.78  | 14.49 | 5.8   | Southeast Asia → The Himalaya |
| Colubridae    | 19.02 | 24.32 | 14.01 | Southeast Asia → The Himalaya |
| Colubridae    | 14.19 | 18.78 | 9.99  | Southeast Asia → The Himalaya |
| Colubridae    | 5.54  | 9.57  | 2.71  | Southeast Asia → The Himalaya |
| Colubridae    | 4.17  | 7.05  | 2.26  | Southeast Asia → The Himalaya |
| Colubridae    | 9.29  | 14.7  | 5.29  | Southeast Asia → The Himalaya |
| Colubridae    | 5.64  | 8.69  | 3.32  | Southeast Asia → The Himalaya |
| Colubridae    | 17.98 | 22.69 | 13.59 | Southeast Asia → The Himalaya |
| Colubridae    | 23.49 | 28.77 | 18.64 | Southeast Asia → The Himalaya |
| Colubridae    | 38.81 | 44.8  | 32.94 | Southeast Asia → The Himalaya |

---

**Table S3.**

PCR details used in this study.

| Clades         | Gene        | Primer name | Primer sequence | Annealing temperature | Source |      |
|----------------|-------------|-------------|-----------------|-----------------------|--------|------|
| <i>Amolops</i> | 16S<br>rRNA | 16SAR       | CGCCTGTTTAYC    | 55°C                  | [33]   |      |
|                |             | 16SBR       | AAAAACAT        |                       |        |      |
|                |             |             | CCGGTYTGAACT    |                       |        |      |
|                | ND2         | Met-LND2    |                 | CAGATCAYGT            | 49°C   | [34] |
|                |             |             |                 | CAATGTTGGTTA          |        |      |
|                |             |             |                 | AAATCCTTCC            |        |      |
|                | Tyr         | Trp-HND2    |                 | AGGCTTTGAAGG          | 50°C   | [34] |
|                |             |             |                 | CCTTTGGTC             |        |      |
|                |             |             |                 | TGCTGGGCRTCT          |        |      |
|                | Tyr         | Tyr1G       |                 | CTCCARTCCCA           | 50°C   | [35] |
|                |             |             |                 | AGGCCTCYTRA           |        |      |
|                |             |             |                 | GGAAGGAATG            |        |      |
|                | Tyr         | Tyr1B       |                 | TCCTCCGTGGGC          | 50°C   | [35] |
|                |             |             |                 | ACCCARTTCCC           |        |      |
|                |             |             |                 | TCATCTCCCGYC          |        |      |
|                | RAG1        | Tyr1D       |                 | AYCTTCTGGAT           | 50°C   | [35] |
|                |             |             |                 | CTGGTCGTCAGA          |        |      |
|                |             |             | L-RAG1Ran       |                       |        |      |
| RAG1           | Tyr1E       |             | TCTTTCAGC       | 50°C                  | [36]   |      |
|                |             |             | GCAAAACGTTGA    |                       |        |      |
|                |             |             | H-RAG1Ran       |                       |        |      |
| RAG1           | Tyr1F       |             | GAGTGATAAC      | 50°C                  | [36]   |      |
|                |             |             | GGAAATTGGTGG    |                       |        |      |
|                |             |             | L-RAG1Ranint    |                       |        |      |
| RAG1           | Tyr1G       |             | AATCCTCAG       | 50°C                  | [36]   |      |
|                |             |             | ATATAGATAGAG    |                       |        |      |
|                |             |             | H-RAG1Ranint    |                       |        |      |
| RAG1           | Tyr1H       |             | CCTGAGGC        | 50°C                  | [36]   |      |
|                |             |             | CGCCTGTTTAYC    |                       |        |      |
|                |             |             | AAAAACAT        |                       |        |      |
| <i>Feihyla</i> | 16S<br>rRNA | 16SAR       | CGCCTGTTTAYC    | 55°C                  | [33]   |      |
|                |             | 16SBR       | AAAAACAT        |                       |        |      |
|                |             |             | CCGGTYTGAACT    |                       |        |      |

|                    |              |              |                   |                   |
|--------------------|--------------|--------------|-------------------|-------------------|
|                    |              |              | CAGATCAYGT        |                   |
|                    |              |              | CGCCTGTTTAYC      |                   |
| <i>Gracixalus</i>  | 16S          | 16SAR        | AAAAACAT          | [33]              |
|                    | rRNA         |              | CCGGTYTGAACT      | 55°C              |
|                    |              | 16SBR        | CAGATCAYGT        | [33]              |
|                    |              |              | AAACTGGGATTA      |                   |
|                    | L2519        | GATACCCCACTA |                   |                   |
|                    |              | T            | 55°C              | [33]              |
|                    |              | CCGGTYTGAACT |                   |                   |
|                    |              | 16SBR        | CAGATCAYGT        | [33]              |
| <i>Kurixalus</i>   | 12-          |              | GCTAGACCATKA      |                   |
|                    | 16S          | H3296        | TGCAAAAGGTA       | [33]              |
|                    | rRNA         |              | CGCCTGTTTAYC      |                   |
|                    |              | 16SAR        | AAAAACAT          | [33]              |
|                    |              | 12/16S-696F  | TATARCAATAGT      |                   |
|                    |              |              | ACCGCAAG          | <b>This study</b> |
|                    | 12/16S-1563R | CGGTTAGGATAC |                   |                   |
|                    |              | CGCGGCCGT    | <b>This study</b> |                   |
|                    |              | AAACTGGGATTA |                   |                   |
|                    | L2519        | GATACCCCACTA |                   |                   |
|                    |              | T            | 55°C              | [33]              |
|                    |              | CCGGTYTGAACT |                   |                   |
|                    |              | 16SBR        | CAGATCAYGT        | [33]              |
| <i>Polypedates</i> | 12-          |              | GCTAGACCATKA      |                   |
|                    | 16S          | H3296        | TGCAAAAGGTA       | [33]              |
|                    | rRNA         |              | CGCCTGTTTAYC      |                   |
|                    |              | 16SAR        | AAAAACAT          | [33]              |
|                    |              | 12/16S-696F  | TATARCAATAGT      |                   |
|                    |              |              | ACCGCAAG          | <b>This study</b> |
|                    | 12/16S-1563R | CGGTTAGGATAC | <b>This study</b> |                   |

|                    |      |              |              |      |                   |
|--------------------|------|--------------|--------------|------|-------------------|
|                    |      |              | CGCGGCCGT    |      |                   |
|                    |      |              | AAACTGGGATTA |      |                   |
|                    |      | L2519        | GATACCCCACTA |      |                   |
|                    |      |              | T            | 55°C | [33]              |
|                    |      | 16SBR        | CCGGTYTGAACT |      |                   |
|                    |      |              | CAGATCAYGT   |      | [33]              |
| <i>Theلودerma</i>  | 12-  | H3296        | GCTAGACCATKA |      |                   |
|                    | 16S  |              | TGCAAAAGGTA  |      | [33]              |
|                    | rRNA | 16SAR        | CGCCTGTTTAYC |      |                   |
|                    |      |              | AAAAACAT     |      | [33]              |
|                    |      | 12/16S-696F  | TATARCAATAGT |      |                   |
|                    |      |              | ACCGCAAG     |      | <b>This study</b> |
|                    |      | 12/16S-1563R | CGGTTAGGATAC |      |                   |
|                    |      |              | CGCGGCCGT    |      | <b>This study</b> |
|                    |      | 16SAR        | CGCCTGTTTAYC |      |                   |
|                    | 16S  |              | AAAAACAT     | 55°C | [33]              |
| <i>Raorchestes</i> | rRNA | 16SBR        | CCGGTYTGAACT |      |                   |
|                    |      |              | CAGATCAYGT   |      | [33]              |
|                    |      |              | TCTGGRTGAGCA |      |                   |
|                    | ND1  | ND1-F        | TCAAACCTCT   | 50°C | <b>This study</b> |
|                    |      |              | TATCTTTCGGGC |      |                   |
|                    |      | ND1-R        | ACATTTCCAT   |      | <b>This study</b> |
|                    |      | AAACTGGGATTA |              |      |                   |
|                    |      | L2519        | GATACCCCACTA |      |                   |
|                    |      |              | T            | 55°C | [33]              |
| <i>Rhacophorus</i> | 12-  | 16SBR        | CCGGTYTGAACT |      |                   |
|                    | 16S  |              | CAGATCAYGT   |      | [33]              |
|                    | rRNA |              | GCTAGACCATKA |      |                   |
|                    |      | H3296        | TGCAAAAGGTA  |      | [33]              |
|                    |      | 16SAR        | CGCCTGTTTAYC |      | [33]              |

*Nanorana*

|      |              |                             |                   |
|------|--------------|-----------------------------|-------------------|
|      |              | AAAAACAT                    |                   |
|      | 12/16S-696F  | TATARCAATAGT<br>ACCGCAAG    | <b>This study</b> |
|      | 12/16S-1563R | CGGTTAGGATAC<br>CGCGGCCGT   | <b>This study</b> |
|      | L-RAG1Ran    | CTGGTCGTCAGA<br>TCTTTCAGC   | [36]              |
|      | H-RAG1Ran    | GCAAAACGTTGA<br>GAGTGATAAC  | [36]              |
| RAG1 | L-RAG1Ranint | GGAAATTGGTGG<br>AATCCTCAG   | [36]              |
|      | H-RAG1Ranint | ATATAGATAGAG<br>CCTGAGGC    | [36]              |
|      | CJ-L001      | GACCTACTGTCA<br>CCAA        | <b>This study</b> |
|      | CJ-H004      | CTGGTTTGTTGA<br>GTTCTGTGA   | <b>This study</b> |
| RAG2 | CJ-L002      | CATACCCTTGAA<br>AGTAACA     | <b>This study</b> |
|      | CJ-H003      | AYCACCCATATY<br>RCTACCAAACC | <b>This study</b> |
| Rod  | Rhod1A       | ACCATGAACGGA<br>ACAGAAGYCC  | [35]              |
|      | Rhod1D       | GTAGCGAAGAA<br>RCCTTCAAMGTA | [35]              |
|      | Tyr1G        | TGCTGGGCRTCT<br>CTCCARTCCCA | [35]              |
| Tyr  | Tyr1B        | AGGTCCTCYTRA<br>GGAAGGAATG  | [35]              |
|      | Tyr1D        | TCCTCCGTGGGC                | [35]              |

|                |              |                             |           |
|----------------|--------------|-----------------------------|-----------|
|                |              | ACCCARTTCCC                 |           |
|                | Tyr1F        | TCATCTCCCGYC<br>AYCTTCTGGAT | [35]      |
|                |              | ACCATGAACGGA                |           |
|                | Rhod1A       | ACAGAAGGYCC                 | [35]      |
| Rod            |              | TAGCGAAGAARC                | 50°C      |
|                | Rhod1D       | CTTCAAMGTA                  | [35]      |
|                | Tyr1G        | TGCTGGGCRTCT<br>CTCCARTCCCA | [35]      |
|                | Tyr1B        | AGGTCCTCYTRA<br>GGAAGGAATG  | [35]      |
| Tyr            |              | TCCTCCGTGGGC                | 50°C      |
|                | Tyr1D        | ACCCARTTCCC                 | [35]      |
| <i>Liurana</i> |              | TCATCTCCCGYC                |           |
|                | Tyr1F        | AYCTTCTGGAT                 | [35]      |
|                |              | CTGGTCGTCAGA                |           |
|                | L-RAG1Ran    | TCTTTCAGC                   | [36]      |
|                |              | GCAAAACGTTGA                | 50°C      |
|                | H-RAG1Ran    | GAGTGATAAC                  | [36]      |
| RAG1           |              | GGAAATTGGTGG                |           |
|                | L-RAG1Ranint | AATCCTCAG                   | [36]      |
|                |              | ATATAGATAGAG                |           |
|                | H-RAG1Ranint | CCTGAGGC                    | [36]      |
|                |              | GAATYGGRGGW                 |           |
|                |              | CAACCAGTAGAA                |           |
|                | D- CytbA-L   | GACCC                       | [37]      |
| <i>Bufo</i>    | loop         | GTCCATTGGAGG                | 55°C      |
|                |              | TTAAGATCTACC                |           |
|                | ControlB-H   | A                           | [37]      |
|                | ND1- L3878   | GCCCCATTTGAC                | 50°C [38] |

|                     |               |                                      |                   |
|---------------------|---------------|--------------------------------------|-------------------|
|                     | ND2           | CTCACAGAAGG<br>ATTTTTCGTAGT          |                   |
|                     | H4980         | TGGGTTTGRTT<br>AAGCTTTCGGGC          | [39]              |
|                     | L4437         | CCATACC<br>AAGGACCTCCTT              | [39]              |
|                     | L4221         | GATAGGGA<br>GGTATGGGCCCA             | [38]              |
|                     | H4419         | AAAGCTT<br>AAACTGGGATTA              | [38]              |
|                     | L2519         | GATACCCCACTA<br>T                    | 55°C [33]         |
|                     | 16SBR         | CCGGTYTGA<br>CAGATCAYGT              | [33]              |
| <i>Duttaphrynus</i> | 12-<br>16S    | H3296<br>GCTAGACCATKA<br>TGCAAAAGGTA | [33]              |
|                     | rRNA<br>16SAR | CGCCTGTTTAYC<br>AAAAACAT             | [33]              |
|                     | 12/16S-696F   | TATARCAATAGT<br>ACCGCAAG             | <b>This study</b> |
|                     | 12/16S-1563R  | CGGTTAGGATAC<br>CGCGGCCGT            | <b>This study</b> |
|                     |               | TYTCWACWAAY<br>CAYAAAGAYAT           |                   |
|                     | COI           | Chmf4<br>CGG                         | 46°C [40]         |
| <i>Scutiger</i>     |               | ACYTCRGGRTGR                         |                   |
|                     |               | Chmr4<br>CCRAARAATCA<br>CTTCCATCCAAC | [40]              |
|                     | Cytb          | L141841<br>ATCTCAGCATGA<br>TGAAA     | 50°C [41]         |

|                                    |      |              |               |                        |
|------------------------------------|------|--------------|---------------|------------------------|
|                                    |      |              | ACAAGACCAATG  |                        |
|                                    |      |              | CTTTAGTTAAGC  |                        |
|                                    |      | SCU5         | TAC           | [41]                   |
|                                    |      |              | AAACTGGGATTA  |                        |
|                                    |      | L2519        | GATACCCCACTA  |                        |
|                                    |      |              | T             | 55°C [33]              |
|                                    |      | 16SBR        | CCGGTYTGA ACT |                        |
|                                    |      |              | CAGATCAYGT    | [33]                   |
|                                    | 12-  |              | GCTAGACCATKA  |                        |
|                                    | 16S  | H3296        | TGCAAAAGGTA   | [33]                   |
| <i>Leptobrachium</i>               | rRNA |              | CGCCTGTTTAYC  |                        |
|                                    |      | 16SAR        | AAAAACAT      | [33]                   |
|                                    |      |              | TATARCAATAGT  |                        |
|                                    |      | 12/16S-696F  | ACCGCAAG      | <b>This study</b>      |
|                                    |      |              | CGGTTAGGATAC  |                        |
|                                    |      | 12/16S-1563R | CGCGGCCGT     | <b>This study</b>      |
|                                    |      |              | CAGAAGCGTGCC  |                        |
|                                    |      | HERP691      | CGAAYA        | 54°C <b>This study</b> |
|                                    |      |              | CCTCTGGATTGG  |                        |
|                                    | ND1- | HERP692      | GYGTTC        | <b>This study</b>      |
| <i>Calotes</i>                     | ND2  |              | AATGCCTGAYTT  |                        |
|                                    |      | HERP693      | ACYGGA        | <b>This study</b>      |
|                                    |      |              | CTGGAAGTCAGA  |                        |
|                                    |      | HERP694      | AGTGGG        | <b>This study</b>      |
|                                    |      |              | AGGACTYGAACC  |                        |
| <i>Japalura sensu lato</i>         |      | PTF          | TCYACA        | 54°C <b>This study</b> |
| <i>(Ptyctolaemus,</i>              | ND1- |              | GGTTGTGKCGTC  |                        |
| <i>Diploderma, Japalura</i>        | ND2  | PTR          | ATTTTA        | <b>This study</b>      |
| <i>sensu stricto, Mictopholis,</i> |      |              | TAACSGGTARCT  |                        |
| <i>Pseudocalotes)</i>              |      | PTNF         | GAGCCA        | <b>This study</b>      |



|                |      |        |               |                   |
|----------------|------|--------|---------------|-------------------|
|                |      |        | TTTGATTTATTCC |                   |
|                |      | PTNR   | GCCYC         | <b>This study</b> |
|                |      |        | AAACTGGGATTA  |                   |
|                | 12S  | L2519  | GATACCCCACTA  |                   |
|                | rRNA |        | T             | 55°C [33]         |
|                |      | H3296  | GCTAGACCATKA  |                   |
|                |      |        | TGCAAAAGGTA   | [33]              |
|                |      |        | CGCCTGTTTAYC  |                   |
|                | 16S  | 16SAR  | AAAAACAT      | [33]              |
|                | rRNA |        | CCGGTYTGA ACT | 55°C              |
|                |      | 16SBR  | CAGATCAYGT    | [33]              |
|                |      |        | GACCTGTGATMT  |                   |
| <i>Naja</i>    |      |        | GAAAACCA YCGT |                   |
|                |      | L14910 | TGT           | [42]              |
|                | Cytb |        | CTTTGGTTTACA  | 55°C              |
|                |      |        | AGAACAATGCTT  |                   |
|                |      | H16064 | TA            | [42]              |
|                |      |        | CACCTATGACTA  |                   |
|                |      |        | CCAAAAGCTCAT  |                   |
|                |      | ND4    | GTAGAAGC      | [43]              |
|                | ND4  |        | ACCACGTTTAGG  | 55°C              |
|                |      |        | TTCATTTTCATTA |                   |
|                |      | LEU    | C             | [43]              |
|                |      |        | TYTCWACWAAY   |                   |
|                |      |        | CAYAAAGAYAT   |                   |
| <i>Dopasia</i> | COI  | Chmf4  | CGG           | 46°C [40]         |
|                |      |        | ACYTCRGGRTGR  |                   |
|                |      | Chmr4  | CCRAARAATCA   | [40]              |
|                |      |        | GACCTGTGATMT  |                   |
| <i>Pareas</i>  | Cytb | L14910 | GAAAACCA YCGT | 55°C [42]         |

|                           |                 |              |                   |
|---------------------------|-----------------|--------------|-------------------|
|                           |                 | TGT          |                   |
|                           |                 | CTTTGGTTTACA |                   |
|                           |                 | AGAACAATGCTT |                   |
|                           | H16064          | TA           | [42]              |
|                           |                 | CATGGACTGGGA |                   |
| C-                        | S77             | TCAGTTATG    | [44]              |
| mos                       |                 | CCTTGGGTGTGA | 55°C              |
|                           | S78             | TTTTCTCACCT  | [44]              |
|                           |                 | TTTAGGGCTTTG |                   |
|                           | Trpr3a          | AAGGC        | [45]              |
|                           |                 | AGTAGYAGGYG  |                   |
|                           | LJXND1-ND2R     | RCAGGTTGT    | <b>This study</b> |
| <i>Asymblepharus</i>      | ND1-            | AACTTCCTCCCW | 54°C              |
|                           | ND2 LJXND1-ND2F | CTMACCYT     | <b>This study</b> |
|                           |                 | ATTTTTCGTAGT |                   |
|                           | H4980           | TGGGTTTGRTT  | [39]              |
|                           |                 | AAGCTTTCGGGC |                   |
|                           | L4437           | CCATACC      | [39]              |
|                           |                 | AAGCTTTCGGGC |                   |
|                           | ND2 L4437 *     | CCATACC      | [39]              |
|                           |                 | TAGGYGGCAGGT | 50°C              |
|                           | SphenoR         | TGTAGCCC     | [46]              |
|                           |                 | CTCTTDTTTGTR |                   |
| <i>Sphenomorphus&amp;</i> | ND2sphR         | GCTTTGAAGGC  | [46]              |
| <i>Scincella</i>          | 12S             | GAGGGTGACGG  |                   |
|                           | rRNA 12S.H1478  | GCGGTGTGT    | [33]              |
|                           |                 | AAACTGGGATTA | 50°C              |
|                           |                 | GATACCCCACTA |                   |
|                           | 12S.L1091       | T            | [33]              |
|                           | 16S 16SF.SKINK  | TGTTTACCAAAA | 50°C [47]         |

|                      |              |                                    |                   |
|----------------------|--------------|------------------------------------|-------------------|
|                      | rRNA         | ACATAGCCTTTA<br>GC<br>TAGATAGAAACC |                   |
|                      | 16SR.SKINK   | GACCTGGATT                         | [47]              |
|                      | HERP654      | AAGCAGTTGGGC<br>CCATACC            | <b>This study</b> |
|                      | ND2          | AGRGTGCCAATG                       | 49°C              |
|                      | HERP665      | TCTTTGTGRTT<br>AAYAATGATAA         | <b>This study</b> |
| <i>Altiphylax</i>    | RAG1 Rag1yff | YGGGGAAAT                          | <b>This study</b> |
|                      |              | ACAGCCAAAGTR                       | 56°C              |
|                      | RAG1 Rag1yfr | TTGAGTAT<br>AGATGAGCATGC           | <b>This study</b> |
|                      | PHOF2        | AGGAGTATGA                         | [48]              |
| PDC                  | TCCACATCCACA | 55°C                               |                   |
|                      |              | GCAAAAAACTCC                       |                   |
|                      | PHOR1        | T                                  | [48]              |
|                      | HERP654      | AAGCAGTTGGGC<br>CCATACC            | <b>This study</b> |
|                      | ND2          | AGRGTGCCAATG                       | 49°C              |
|                      | HERP665      | TCTTTGTGRTT<br>AAYAATGATAA         | <b>This study</b> |
| <i>Cyrtodactylus</i> | RAG1 Rag1yff | YGGGGAAAT                          | <b>This study</b> |
|                      |              | ACAGCCAAAGTR                       | 56°C              |
|                      | RAG1 Rag1yfr | TTGAGTAT<br>AGATGAGCATGC           | <b>This study</b> |
|                      | PHOF2        | AGGAGTATGA                         | [48]              |
| PDC                  | TCCACATCCACA | 55°C                               |                   |
|                      |              | GCAAAAAACTCC                       |                   |
|                      | PHOR1        | T                                  | [48]              |

|                           |         |                   |                   |
|---------------------------|---------|-------------------|-------------------|
|                           |         | AGATGAGCATGC      |                   |
|                           | PHOF2   | AGGAGTATGA        | [48]              |
|                           | PDC     | TCCACATCCACA 55°C |                   |
|                           |         | GCAAAAAACTCC      |                   |
| <i>Hemidactylus</i>       | PHOR1   | T                 | [48]              |
|                           |         | AAYAATGATAA       |                   |
|                           | Rag1yff | YGGGGAAAT         | <b>This study</b> |
|                           | RAG1    | 56°C              |                   |
|                           |         | ACAGCCAAAGTR      |                   |
|                           | Rag1yfr | TTGAGTAT          | <b>This study</b> |
|                           |         | AAGCAGTTGGGC      |                   |
|                           | HERP654 | CCATACC           | <b>This study</b> |
| <i>Hemiphyllodactylus</i> | ND2     | 49°C              |                   |
|                           |         | AGRGTGCCAATG      |                   |
|                           | HERP665 | TCTTTGTGRTT       | <b>This study</b> |
|                           |         | AAACTGGGATTA      |                   |
|                           | L2519   | GATACCCCACTA      |                   |
|                           | 12S     | T                 | 55°C              |
|                           | rRNA    | GCTAGACCATKA      | [33]              |
|                           | H3296   | TGCAAAAGGTA       | [33]              |
|                           |         | CGCCTGTTTAYC      |                   |
|                           | 16SAR   | AAAAACAT          | [33]              |
|                           | 16S     | 55°C              |                   |
|                           | rRNA    | CCGGTYTGA ACT     |                   |
| <i>Ovophis</i>            | 16SBR   | CAGATCAYGT        | [33]              |
|                           |         | GACCTGTGATMT      |                   |
|                           |         | GAAAACCA YCGT     |                   |
|                           | L14910  | TGT               | [42]              |
|                           | Cytb    | 55°C              |                   |
|                           |         | CTTTGGTTTACA      |                   |
|                           |         | AGAACAATGCTT      |                   |
|                           | H16064  | TA                | [42]              |
|                           | ND4 ND4 | CACCTATGACTA 55°C | [43]              |

|                      |      |        |              |           |
|----------------------|------|--------|--------------|-----------|
|                      |      |        | CCAAAAGCTCAT |           |
|                      |      |        | GTAGAAGC     |           |
|                      |      |        | CATTACTTTTAC |           |
|                      | Leu  |        | TTGGATTTGCAC |           |
|                      |      |        | CA           | [43]      |
|                      |      |        | AAACTGGGATTA |           |
|                      | 12S  | L2519  | GATACCCCACTA |           |
|                      | rRNA |        | T            | 55°C [33] |
|                      |      | H3296  | GCTAGACCATKA |           |
|                      |      |        | TGCAAAAGGTA  | [33]      |
|                      |      |        | CGCCTGTTTAYC |           |
|                      | 16S  | 16SAR  | AAAAACAT     | [33]      |
|                      | rRNA |        | CCGGTYTGA    | 55°C      |
|                      |      | 16SBR  | CCGGTYTGA    |           |
|                      |      |        | CAGATCAYGT   | [33]      |
| <i>Protobothrops</i> |      |        | GACCTGTGATMT |           |
|                      |      |        | GAAAACCAYCGT |           |
|                      | Cytb | L14910 | TGT          | 55°C [42] |
|                      |      |        | CTTTGGTTTACA |           |
|                      |      |        | AGAACAATGCTT |           |
|                      |      | H16064 | TA           | [42]      |
|                      |      |        | CATGGACTGGGA |           |
|                      | C-   | S77    | TCAGTTATG    | [44]      |
|                      | mos  |        | CCTTGGGTGTGA | 55°C      |
|                      |      | S78    | TTTTCTCACCT  | [44]      |
|                      |      |        | AAACTGGGATTA |           |
|                      | 12S  | L2519  | GATACCCCACTA |           |
|                      | rRNA |        | T            | 55°C [33] |
| <i>Trimeresurus</i>  |      | H3296  | GCTAGACCATKA |           |
|                      |      |        | TGCAAAAGGTA  | [33]      |
|                      | 16S  | 16SAR  | CGCCTGTTTAYC | 55°C [33] |

|      |        |                                |      |
|------|--------|--------------------------------|------|
| rRNA |        | AAAAACAT                       |      |
|      | 16SBR  | CCGGTYTGA<br>ACT<br>CAGATCAYGT | [33] |
|      |        | GACCTGTGATMT                   |      |
|      |        | GAAAACCA<br>YCGT               |      |
| Cytb | L14910 | TGT                            | [42] |
|      |        | CTTTGGTTTACA                   | 55°C |
|      |        | AGAACAATGCTT                   |      |
|      | H16064 | TA                             | [42] |

---

**Table S4.**

Gene partition models inferred by IQTREE.

| <b>Family</b> | <b>Gene</b>    | <b>Nucleotide substitution model</b> |
|---------------|----------------|--------------------------------------|
| Agamidae      | 12s-16s        | TIM2+F+I+G4                          |
|               | <i>BDNF</i>    | TIM3e+I+G4                           |
|               | <i>C-mos</i>   | K2P+G4                               |
|               | <i>R35</i>     | TIM3+F+G4                            |
|               | <i>Rag1</i>    | TIM+F+I+G4                           |
|               | <i>Cytb</i>    | GTR+F+I+G4                           |
|               | <i>ND1-ND2</i> | GTR+F+I+G4                           |
|               | <i>ND4</i>     | GTR+F+I+G4                           |
|               | <i>AKAP9</i>   | HKY+F                                |
|               | <i>ATPSb</i>   | HKY+F                                |
|               | <i>BACH1</i>   | HKY+F                                |
|               | <i>COI</i>     | TPM2u+F+I+G4                         |
|               | <i>EXPH5</i>   | TIM2+F                               |
| Anguidae      | <i>NKTR</i>    | HKY+F                                |
|               | <i>SELT</i>    | HKY+F                                |
|               | <i>UBN1</i>    | TN+F+G4                              |
|               | <i>Cytb</i>    | TPM2u+F+I+G4                         |
|               | <i>ND2</i>     | TVM+F+I+G4                           |
|               | <i>ND4</i>     | TPM2u+F+I+G4                         |
|               | 12s-16s        | GTR+F+I+G4                           |
| Bufonidae     | <i>CXCR4</i>   | TPM3u+F+I+G4                         |
|               | <i>NXC1</i>    | TIM3+F+I+G4                          |
|               | <i>POMC</i>    | TIM2+F+I+G4                          |
|               | <i>Rag1</i>    | TIM2+F+I+G4                          |
|               | <i>ND2</i>     | K2P+G4                               |

|                   |              |              |
|-------------------|--------------|--------------|
|                   | 12s-16s      | GTR+F+I+G4   |
| Ceratobatrachidae | <i>POMC</i>  | TN+F+G4      |
|                   | <i>Rag1</i>  | HKY+F+G4     |
|                   | <i>Tyr</i>   | TPM3u+F+I+G4 |
|                   | 12S          | TIM2+F+I+G4  |
|                   | <i>C-mos</i> | K3Pu+F+G4    |
| Colubridae        | <i>Cytb</i>  | GTR+F+I+G4   |
|                   | <i>ND2</i>   | GTR+F+I+G4   |
|                   | <i>ND4</i>   | GTR+F+I+G4   |
|                   | 12s-16s      | GTR+F+I+G4   |
| Dicroglossidae    | <i>Rag1</i>  | HKY+F+I+G4   |
|                   | <i>Rag2</i>  | TIM3+F+I+G4  |
|                   | <i>Rhod</i>  | K2P+I+G4     |
|                   | <i>Tyr</i>   | TIM2e+I+G4   |
| Elapidae          | 12s-16s      | GTR+F+I+G4   |
|                   | <i>C-mos</i> | TPM3u+F+G4   |
|                   | <i>Cytb</i>  | GTR+F+I+G4   |
|                   | <i>ND4</i>   | GTR+F+I+G4   |
|                   | <i>Rag1</i>  | TPM3u+F+G4   |
|                   | <i>ND2</i>   | K3Pu+F+I+G4  |
| Geckkonidae       | <i>Rag1</i>  | TN+F+G4      |
|                   | <i>PDC</i>   | TIM2e+G4     |
|                   | 16s          | GTR+F+I+G4   |
| Megophryidae      | <i>BDNF</i>  | K2P+G4       |
|                   | <i>COI</i>   | TVM+F+I+G4   |
|                   | <i>Rag1</i>  | TIMe+G4      |
|                   | <i>Rhod</i>  | K2P+G4       |
| Pareidae          | <i>C-mos</i> | K2P+G4       |
|                   | <i>Cytb</i>  | GTR+F+I+G4   |



|               |               |              |
|---------------|---------------|--------------|
|               | <i>ND4</i>    | GTR+F+I+G4   |
|               | 12s-16s       | GTR+F+I+G4   |
|               | <i>BDNF</i>   | K2P+I        |
|               | <i>CMYC</i>   | K3P+I        |
|               | <i>COI</i>    | TPM2+F+I+G4  |
|               | <i>CXCR4</i>  | TPM2u+F+I+G4 |
|               | <i>Cytb</i>   | TPM2+F+I+G4  |
|               | <i>NCX1</i>   | HKY+F+I      |
| Ranidae       | <i>ND2</i>    | GTR+F+I+G4   |
|               | <i>ND3</i>    | TIM2+F+I+G4  |
|               | <i>POMC</i>   | HKY+F+G4     |
|               | <i>Rag1</i>   | TN+F+G4      |
|               | <i>Rag2</i>   | HKY+F+G4     |
|               | <i>RH1</i>    | K2P+I        |
|               | <i>Rhod</i>   | K2P+I+G4     |
|               | <i>SLC8A3</i> | HKY+F+I      |
|               | <i>Tyr</i>    | TIM2e+I+G4   |
|               | 12s-16s       | GTR+F+I+G4   |
|               | <i>BDNF</i>   | TIM2e+I+G4   |
|               | <i>COI</i>    | TIM2+F+I+G4  |
|               | <i>ND1</i>    | TPM2+F+I+G4  |
| Rhacophoridae | <i>POMC</i>   | TN+F+G4      |
|               | <i>Rag1</i>   | TIM3+F+I+G4  |
|               | <i>Rhod</i>   | TVM+F+I+G4   |
|               | <i>Tyr</i>    | TIM2e+I+G4   |
|               | <i>Cytb</i>   | TPM2u+F+I+G4 |
|               | 12s-16s       | GTR+F+I+G4   |
| Scincidae     | <i>BDNF</i>   | K3P+I+G4     |
|               | <i>C-mos</i>  | TPM2u+F+I+G4 |

|           |              |             |
|-----------|--------------|-------------|
|           | <i>Cytb</i>  | GTR+F+I+G4  |
|           | <i>ND2</i>   | GTR+F+I+G4  |
|           | <i>ND4</i>   | GTR+F+I+G4  |
|           | <i>R35</i>   | TVM+F+G4    |
|           | <i>Rag1</i>  | GTR+F+G4    |
|           | 12s-16s      | TIM2+F+I+G4 |
|           | <i>Cytb</i>  | GTR+F+I+G4  |
|           | <i>ND4</i>   | GTR+F+I+G4  |
|           | <i>BDNF</i>  | TIM2e+I+G4  |
| Viperidae | <i>C-mos</i> | TPM3u+F+G4  |
|           | <i>jun</i>   | HKY+F+G4    |
|           | <i>nt3</i>   | GTR+F+I+G4  |
|           | <i>Rag1</i>  | TPM3+F+G4   |

---

**Table S5.**

The details of each calibration used in this study. The calibration nodes numbers correspond with **Data S6**.

| <b>Calibration nodes no.</b> | <b>Description</b>                                        | <b>Type</b>        | <b>References</b> |
|------------------------------|-----------------------------------------------------------|--------------------|-------------------|
| 1                            | Second calibration for Natatanura from 59.1 Ma to 69.8 Ma | Second calibration | [14]              |
| 2                            | Stem of <i>Pelophylax</i> at least 32 Ma                  | fossil             | [49]              |
| 3                            | Stem of <i>Rana temporaria</i> group at least 19 Ma       | fossil             | [50]              |
| 4                            | Stem of <i>Rana catesbeiana</i> group at least 15 Ma      | fossil             | [51]              |
| 5                            | Stem of <i>Rana pipiens</i> group at least 18 Ma          | fossil             | [52, 53]          |
| 6                            | Stem-Alethinophidia, 95% set around 145 Ma                | fossil             | [54, 55, 56, 57]  |
| 7                            | Stem-Colubroidea, 95% set around 145 Ma                   | fossil             | [54, 55, 56, 57]  |
| 8                            | Stem-Boinae, 95% set around 145 Ma                        | fossil             | [54, 55, 56, 57]  |

|    |                                                                                                                                                                                                                                                                                                                                            |                    |                  |
|----|--------------------------------------------------------------------------------------------------------------------------------------------------------------------------------------------------------------------------------------------------------------------------------------------------------------------------------------------|--------------------|------------------|
| 9  | Stem-Elapidae, 95% set around 145 Ma                                                                                                                                                                                                                                                                                                       | fossil             | [54, 55, 56, 57] |
| 10 | Stem-Viperidae, 95% set around 61.5 Ma                                                                                                                                                                                                                                                                                                     | fossil             | [56]             |
| 11 | Stem- <i>Sistrurus</i> , 95% set around 47.4 Ma                                                                                                                                                                                                                                                                                            | fossil             | [56]             |
| 12 | Oldest ' <i>Bufo</i> ', 55 Ma (L. Palaeocene)                                                                                                                                                                                                                                                                                              | fossil             | [57]             |
| 13 | <i>Rhinella marinus</i> (M), Mie Miocene (11 Ma)                                                                                                                                                                                                                                                                                           | fossil             | [58]             |
| 14 | A minimum age of 18 Ma for the stem origin of toads belonging to the <i>Bufo viridis</i> group                                                                                                                                                                                                                                             | fossil             | [49, 59, 60]     |
| 15 | A minimum age of 9.6 Ma for the origin of toads belonging to the <i>Bufo bufo</i> group                                                                                                                                                                                                                                                    | fossil             | [49]             |
| 16 | Second calibration for Megophryidae from 115.6 Ma to 141.5 Ma                                                                                                                                                                                                                                                                              | Second calibration | [61]             |
| 17 | MRCA for the <i>Spea-Scaphiopus</i> split at 33.3 Ma based on the oldest fossil scaphiopodid originally assigned with considerable confidence to the genus <i>Scaphiopus</i> (and not <i>Spea</i> ), <i>S. skinneri</i> Estes, 1970, from the early Oligocene (Rupelian stage, 33.9–28.1 Ma, more specifically the Orellan, 33.9–33.3 Ma). | fossil             | [62]             |
| 18 | MRCA for the Pelodytidae-Pelobatidae split at 50.3 Ma based on the recently described, earliest known fossil pelodytid, <i>Aerugoamnis paulus</i> from the lower Eocene                                                                                                                                                                    | fossil             | [63]             |

|    |                                                                                                                                                                                                                                                                                    |                    |      |
|----|------------------------------------------------------------------------------------------------------------------------------------------------------------------------------------------------------------------------------------------------------------------------------------|--------------------|------|
|    | (Wasatchian, 55.4–50.3 Ma) of the Green River formation, Wyoming, which was characterized based on a single almost complete, and mostly articulated specimen MRCA for the Pelobatidae-Megophryidae split at 46.2 Ma, based on the recently described oldest unequivocally assigned |                    |      |
| 19 | pelobatid species, <i>Eopelobates deani</i> , from the early middle Eocene (or more specifically the Bridgerian, 50.3–46.2 Ma) of the Green River Formation, Wyoming                                                                                                               | fossil             | [64] |
|    | The oldest known anguid, with the most complete fossil record of any lizard, is                                                                                                                                                                                                    |                    |      |
| 20 | <i>Odaxosaurus</i> , from the late Campanian of Canada, approximately 75 Ma.                                                                                                                                                                                                       | fossil             | [65] |
|    | The earliest record of <i>Ophisaurus</i> in Europe is a parietal of <i>Ophisaurus</i> sp. from the late                                                                                                                                                                            |                    |      |
| 21 | Eocene Newton Bone Bed (Osborne Member, ca. 35 Ma)                                                                                                                                                                                                                                 | fossil             | [66] |
|    | The fossil and associated fossil material were found in the Split Rock Formation in                                                                                                                                                                                                |                    |      |
| 22 | the Granite Mountains of central Wyoming. The minimum chronostratigraphic age of                                                                                                                                                                                                   | fossil             | [67] |
|    | <i>Elgaria</i> is 16.7 Ma                                                                                                                                                                                                                                                          |                    |      |
| 23 | root age: 123 Ma (124.5–121.4 Ma)                                                                                                                                                                                                                                                  | Second calibration | [68] |
|    | stem age of <i>Sceloporus</i> : at least 16 Ma (20.4–16 Ma)                                                                                                                                                                                                                        |                    |      |
| 24 |                                                                                                                                                                                                                                                                                    | fossil             | [69] |
|    | Crown age of Phrynosomatinae (Phrynosoma, <i>Callisaurus</i> , <i>Uma</i> ): at least                                                                                                                                                                                              |                    |      |
| 25 | 33.3 Ma                                                                                                                                                                                                                                                                            | fossil             | [70] |

|    |                                                                                           |                    |              |
|----|-------------------------------------------------------------------------------------------|--------------------|--------------|
| 26 | Crown-group age of Phrynosomatidae: at least 33.9 Ma                                      | fossil             | [70]         |
| 27 | Crown age of <i>Anolis</i> : at least 15 Ma                                               | fossil             | [71]         |
| 28 | Stem age of <i>Polychrus</i> : at least 33.9 Ma                                           | fossil             | [70]         |
| 29 | Crown age of Iguanidae ( <i>sensu stricto</i> ): at least 16 Ma                           | fossil             | [72, 73]     |
| 30 | Crown age of Acrodonta(stem age of Chamaeleonidae): at least 48.6 Ma                      | fossil             | [72, 73, 74] |
| 31 | Crown age of Agamidae (stem age of Uromastyx): at least 33.9 Ma                           | fossil             | [73, 76]     |
| 32 | Stem age of <i>Istiurus lesuerii</i> : at least 21 Ma                                     | fossil             | [73, 76]     |
| 33 | Crown age Pleurodonta:at least 70 Ma                                                      | fossil             | [77]         |
| 34 | Crown age of Gekkota at least 54 Ma                                                       | fossil             | [78]         |
| 35 | Stem of Scincidae at least 70 Ma                                                          | fossil             | [80, 81]     |
| 36 | Stem mrca of Xantusiidae, Gerrhosauridae and Cordylidae at least 65.2 Ma                  | fossil             | [81]         |
| 37 | Upper value of 95% interval of node of the mrca of Gekkota                                | Second calibration | [82]         |
| 38 | Divergence between <i>Sphaerodactylus elegans</i> and <i>S. roosevelti</i> at 20–15Ma     | fossil             | [83]         |
| 39 | The divergence between <i>Woodworthia maculata</i> and <i>Oedura marmorata</i> at 19–16Ma | fossil             | [83]         |
| 40 | The most-recent common ancestor of Gekkota at 110–97 Ma                                   | fossil             | [84]         |

---

**Data S1.**

Calibrated divergence time tree files analyzed by MCMCTREE of 14 families (in newick format).

## Agamidae

((((((((((((((((((Diploderma\_brevipes:0.074229,Diploderma\_luei:0.074229):0.029452,Diploderma\_makii:0.103681):0.04265,Diploderma\_polygonata:0.146331):0.03795,Diploderma\_swinhonis:0.184281):0.043784,(Diploderma\_flaviceps:0.157142,Diploderma\_splendida:0.157142):0.070922):0.015732,((Diploderma\_dymondi:0.110586,Diploderma\_varcoae:0.110586):0.064689,(Diploderma\_micangshanensis:0.13571,Diploderma\_zhaoermii:0.13571):0.039565):0.068522):0.050489,Diploderma\_iadinum:0.294286):0.027585,(((Diploderma\_vela:0.081203,Diploderma\_batangensis:0.081203):0.025091,Diploderma\_yulongense:0.106294):0.140567,(Diploderma\_laeviventris:0.170443,Diploderma\_slowinskii:0.170443):0.076417):0.023941,(Diploderma\_chapaensis:0.079921,Diploderma\_yunnanense:0.079921):0.190879):0.051069):0.084967,(Pseudocalotes\_bapoensis:0.254563,Pseudocalotes\_brevipes:0.254563):0.152274):0.124952,(Acanthosaura\_armata:0.264828,Acanthosaura\_lepidogaster:0.264828):0.266961):0.03714,((Cristidorsa\_planidorsata:0.13881,Cristidorsa\_otai:0.13881):0.37372,Salea\_horsfieldii:0.51253):0.056399):0.035155,((((((Calotes\_calotes:0.182358,Calotes\_htunwini:0.182358):0.05367,Calotes\_ceylonensis:0.236027):0.03484,(Calotes\_versicolor:0.079723,Calotes\_irawadi:0.079723):0.191144):0.066547,((Calotes\_jerdoni:0.163372,Calotes\_medogensis:0.163372):0.108575,Calotes\_minor:0.271947):0.065467):0.047453,((Calotes\_emma:0.026353,Calotes\_chincollium:0.026353):0.315693,Calotes\_mystaceus:0.342046):0.042821):0.140073,((((((Sitana\_laticeps:0.074378,Sitana\_spinaecephalus:0.074378):0.054275,Sitana\_sivalensis:0.128653):0.035155,Sitana\_marudhamneydhal:0.163808):0.021143,(Sitana\_ponticeriana:0.0820570013473034,Sitana\_visiri:0.082057):0.102895):0.087281,Sarada\_deccanensis:0.272233):0.150218,Otocryptis\_beddomei:0.422451):0.102489):0.047832,(((Aphaniotis\_fusca:0.273888,Coryphophylax\_subcristatus:0.273888):0.151658,(Bronchocela\_cristatella:0.314953,Gonocephalus\_grandis:0.314953):0.110593):0.07911,(Lyriocephalus\_scutatus:0.327699,Ceratophora\_aspera:0.327699):0.176957):0.068116):0.031312):0.070299,((((((((Draco\_obscurus:0.10198,Draco\_teniopterus:0.10198):0.085852,Draco\_blanfordii:0.187832):0.025104,(Draco\_haematopogon:0.167935,Draco\_melanopogon:0.167935):0.045001):0.03119,Draco\_quinquefasciatus:0.244125):0.020618,Draco\_maximus:0.264744):0.053891,Draco\_maculatus:0.318635):0.055314,(((Draco\_cornutus:0.167187,Draco\_volans:0.167187):0.095257,Draco\_bimaculatus:0.262444):0.049308,Draco\_biaro:0.311752):0.062197):0.036828,Draco\_dussumieri:0.410777):0.025923,Draco\_lineatus:0.4367):0.10996,(((Japalura\_variegata:0.347727,Pseudocalotes\_austeniana:0.347727):0.058576,Japalura\_andersoniana:0.406303):0.03201,(Japalura\_tricarinata:0.376687,Japalura\_kumaonensis:0.376687):0.061625):0.108348):0.031404,(Ptyctolaemus\_collicristatus:0.386566,Ptyctolaemus\_gularis:0.386566):0.191498):0.096319):0.109088,Mantheyus\_phuwuanensis:0.783472):0.106602,((((((((Phrynocephalus\_raddei:0.083081,Phrynocephalus\_reticulatus:0.083081):0.07153,Phrynocephalus\_rossikowi:0.154611):0.024651,Phrynocephalus\_strauchi:0.179262):0.045876,(Phrynocephalus\_helioscopus:0.161231,Phrynocephalus\_persicus:0.161231):0.063907):0.015151,(((Phrynocephalus\_przewalskii:0.042475,Phrynocephalus\_frontalis:0.042475):0.020857,Phrynocephalus\_versicolor:0.063332):0.060514,Phrynocephalus\_guttatus:0.123846):0.07904,Phrynocephalus\_axillaris:0.202886):0.037404):0.023118,Phrynocephalus\_mystaceus:0.263407):0.021181,(((Phrynocephalus\_vlangalii:0.042869,Phrynocephalus\_erythrurus:0.042869):0.047565,Phrynocephalus\_theobaldi:0.090434):0.027167,(Phrynocephalus\_putjatia:0.036538,Phrynocephalus\_guinanensis:0.036538):0.081063):0.021183,Phrynocephalus\_forsythii:0.138785):0.145803):0.043853,(((Phrynocephalus\_arabicus:0.154113,Phrynocephalus\_maculatus:0.154113):0.103894,Phrynocephalus\_scutellatus:0.258007):0.034803,(Phrynocephalus\_interscapularis:0.212901,Phrynocephalus\_ornatus:0.212901):0.07991):0.035



63):0.194001,Stellagama\_stellio:0.522441):0.034133,((Paralaudakia\_himalayana:0.204435,Paralaudakia\_lehmanni:0.204435):0.061123,Paralaudakia\_caucasia:0.265558):0.291016):0.046346,(((Acanthocercus\_atricollis:0.17171,Xenagama\_taylori:0.17171):0.176662,Pseudotrapelus\_sinaitus:0.348373):0.156682,(Agama\_agama:0.245285,Agama\_anchietae:0.245285):0.25977):0.030672,((Trapelus\_agilis:0.093841,Trapelus\_mutabilis:0.093841):0.222546,Bufoniceps\_laungwalaensis:0.316387):0.21934):0.067193):0.046354,(((Laudakia\_tuberculata:0.220084,Laudakia\_papenfussi:0.220084):0.247137,(Laudakia\_sacra:0.073726,Laudakia\_wui:0.073726):0.393494):0.085232,(Laudakia\_nupta:0.448327,Laudakia\_melanura:0.448327):0.104125):0.096822):0.240799):0.048057,Hydrosaurus\_amboinensis:0.938131):0.026518,((((((((Tympanocryptis\_tetraporphora:0.127828,Tympanocryptis\_lineata:0.127828):0.066744,Pogona\_vitticeps:0.194572):0.020892,(Diporiphora\_nobbi:0.158108,Diporiphora\_winneckeii:0.158108):0.057355):0.020825,Rankinia\_diemensis:0.236289):0.020718,Gowidon\_temporalis:0.257007):0.018083,(Chlamydosaurus\_kingii:0.165121,Amphibolurus\_muricatus:0.165121):0.109968):0.04146,(Ctenophorus\_adelaidensis:0.247188,Ctenophorus\_isolepis:0.247188):0.069362):0.037741,Intellagama\_lesueurii:0.354291):0.021452,((Chelosania\_brunnea:0.279199,Moloch\_horridus:0.279199):0.059767,Hypsilurus\_boydii:0.338966):0.036777):0.123379,Physignathus\_cocincinus:0.499122):0.465527):0.085557,(Leiolepis\_belliana:0.259154,Leiolepis\_guttata:0.259154):0.791052):0.049546,((Uromastix\_acanthinura:0.251193,Uromastix\_aegyptia:0.251193):0.182597,Saara\_hardwickii:0.433791):0.66596);

#### **Anguidae**

((((((((Dopasia\_hainanensis:0.15496,Dopasia\_sp:0.15496):0.034935,Dopasia\_harti:0.189895):0.089765,Dopasia\_gracilis:0.27966):0.091846,(Ophisaurus\_ventralis:0.289145,Ophisaurus\_attenuatus:0.289145):0.082361):0.044481,(Anguis\_fragilis:0.27204,Pseudopus\_apodus:0.27204):0.143948):0.041828,Hyalosaurus\_koellikeri:0.457815):0.179639,(((Abroniam\_graminea:0.293464,Mesaspis\_monticola:0.293464):0.032031,Barisia\_imbricata:0.325494):0.035709,Gerrhonotus\_parvus:0.361203):0.062683,Elgaria\_kingii:0.423886):0.213568);

#### **Bufonidae**

((((((((((((((((Bufo\_aspinus:0.034532,Bufo\_cryptotympanicus:0.034532):0.026912,Bufo\_tuberospinus:0.061444):0.042135,Bufo\_tuberculatus:0.103579002618313):0.021686,((Bufo\_japonicus:0.080281,Bufo\_torrenticola:0.080281):0.021912,Bufo\_stejnegeri:0.102193):0.023072):0.015181,(Bufo\_bankorensis:0.026894,Bufo\_gargarizans:0.026894):0.113552):0.066838,(Bufo\_bufo:0.022319,Bufo\_verrucosissimus:0.022319):0.184965):0.087301,((Barbarophryne\_brongersmai:0.252178,Epidalea\_calamita:0.252178):0.028778,Sabahphrynus\_maculatus:0.280956):0.01363):0.014149,(((Ingerophrynus\_biporcatus:0.134079,Ingerophrynus\_parvus:0.134079):0.022972,Ingerophrynus\_philippinicus:0.157052):0.019457,Ingerophrynus\_divergens:0.176509):0.027184,(Ingerophrynus\_galeatus:0.133799,Ingerophrynus\_macrotis:0.133799):0.069894):0.085938,(Didynamipus\_sjostedti:0.261679,Schismaderma\_carens:0.261679):0.027952):0.019103):0.00998,((((((((Duttaphrynus\_brevirostris:0.067146,Duttaphrynus\_melanostictus:0.067146):0.015038,Duttaphrynus\_parietalis:0.082185):0.048002,(Duttaphrynus\_atukoralei:0.048006,Duttaphrynus\_scaber:0.048006):0.08218):0.01228,Duttaphrynus\_himalayanus:0.142466):0.028046,(Duttaphrynus\_crocus:0.148453,Duttaphrynus\_stuarti:0.148453):0.022059):0.038558,((Duttaphrynus\_hololius:0.086715,Duttaphrynus\_stomaticus:0.086715):0.033945,Duttaphrynus\_dhufarensis:0.12066):0.08841):0.022401,(Bufoideus\_meghalayanus:0.166909,Xanthophryne\_koynayensis:0.166909):0.064562):0.009916,Adenomus

\_kelaartii:0.241387):0.022926,Pedostibes\_tuberculosis:0.264313):0.036941,((Phrynoideis\_asper:0.123844,Phrynoideis\_juxtasper:0.123844):0.113195,Pedostibes\_hosii:0.237039):0.064215):0.007345,Leptophryne\_borbonica:0.308599):0.010116):0.00339,(((Ansonia\_hanitschi:0.216217,Ansonia\_leptopus:0.216217):0.051805,(Pelophryne\_misera:0.151099,Pelophryne\_signata:0.151099):0.116923):0.042513,(Ansonia\_ornata:0.281423,Strauchbufo\_raddei:0.281423):0.029112):0.011569):0.002563,((((Bufotes\_baturae:0.0174239997397661,Bufotes\_zamdaensis:0.017424):0.05791,(Bufotes\_boulengeri:0.029109,Bufotes\_siculus:0.029109):0.046225):0.014583,Bufotes\_balearicus:0.089917):0.037274,((Bufotes\_oblongus:0.015243,Bufotes\_pewzowi:0.015243):0.060226,Bufotes\_variabilis:0.075468):0.051722):0.04714,Bufotes\_viridis:0.174331):0.150336):0.00496,((Nectophrynoideis\_tornieri:0.111337,Nectophrynoideis\_viviparus:0.111337):0.105278,Churamiti\_maridadi:0.216614):0.113013):0.007554,((((Mertensophryne\_micranotis:0.166108,Mertensophryne\_uzunguensis:0.166108):0.054421,Poyntonophrynus\_dombensis:0.220529):0.067291,(Sclerophrys\_brauni:0.18704,Sclerophrys\_garmani:0.18704):0.10078):0.022984,((Capensibufo\_rosei:0.102099,Capensibufo\_tradouwi:0.102099):0.157731,Vandijkophrynus\_amatolicus:0.25983):0.050974):0.017133,((Nectophryne\_afra:0.240898,Werneria\_mertensiana:0.240898):0.035759,Wolterstorffina\_parvipalmata:0.276657):0.05128):0.009244):0.023192,(((Anaxyrus\_americanus:0.032126,Anaxyrus\_terrestris:0.032126):0.134079,Anaxyrus\_quercicus:0.166204):0.139675,((Incilius\_alvarius:0.239402,Incilius\_coccifer:0.239402):0.038774,Bufotes\_latastii:0.278176):0.027703):0.032174,((Rhinella\_marina:0.025028,Rhinella\_schneideri:0.025028):0.232684,Rhinella\_nattereri:0.257712):0.080341):0.02232):0.030105,(Peltophryne\_lemur:0.32656,Rhaebo\_haematiticus:0.32656):0.063918):0.037936,(Nannophryne\_apolobambica:0.301935,Nannophryne\_cophotis:0.301935):0.126478):0.053582,Dendrophryniscus\_minutus:0.481996):0.049585,((Atelopus\_peruensis:0.25548,Atelopus\_spumarius:0.25548):0.203261,Osornophryne\_guacamayo:0.458741):0.072839):0.070374,(Melanophryniscus\_klappenbachi:0.071871,Melanophryniscus\_stelzneri:0.071871):0.530082);

### **Ceratobatrachidae**

((((((((Platymantis\_indeprensus:0.029158,Platymantis\_mimulus:0.029158):0.033786,Platymantis\_naomii:0.062944):0.019221,Platymantis\_pseudodorsalis:0.082165):0.015645,(Platymantis\_cagayanensis:0.019479,Platymantis\_taylori:0.019479):0.078332):0.015872,(Platymantis\_dorsalis:0.085823,Platymantis\_paengi:0.085823):0.02786):0.032329,Platymantis\_spelaeus:0.146012):0.039644,(((Platymantis\_luzonensis:0.030234,Platymantis\_negrosensis:0.030234):0.044574,Platymantis\_rabori:0.074808):0.017032,(Platymantis\_bayani:0.061353,Platymantis\_guentheri:0.061353):0.030488):0.025539,Platymantis\_diesmosi:0.11738):0.068276):0.074103,((((Platymantis\_hazelae:0.017886,Platymantis\_panayensis:0.017886):0.045217,Platymantis\_lawtoni:0.063103):0.011775,(Platymantis\_polillensis:0.027232,Platymantis\_sierramadrensis:0.027232):0.047647):0.008003,Platymantis\_subterrestris:0.082882):0.016354,Platymantis\_isarog:0.099236):0.09965,Platymantis\_corrugatus:0.198886):0.043755,(((Platymantis\_banahao:0.085272,Platymantis\_insulatus:0.085272):0.027618,Platymantis\_pygmaeus:0.11289):0.030219,Platymantis\_levigatus:0.143109):0.099532):0.017119):0.095506,((((Cornufer\_occidentalis:0.034194,Cornufer\_pelewensis:0.034194):0.021478,Cornufer\_papuensis:0.055672):0.05877,(Cornufer\_boulengeri:0.051724,Cornufer\_gilliardi:0.051724):0.062718):0.023316,(Cornufer\_adiastolus:0.099893,Cornufer\_akarithymus:0.099893):0.037865):0.017078,Cornufer\_weberi:0.154836):0.039403,Cornufer\_solomonis:0.194239):0.032265,Cornufer\_parilis:0.226504):0.025935,(((Cornufer\_bufonulus:0.108669,Cornufer\_caesiops:0.108669):0.076067,Cornufer\_minutus:0.184736):0.04114,((Cornufer\_vertrebralis:0.058268,Cornufer\_

wolfi:0.058268):0.124282,Cornufer\_cheesemanae:0.18255):0.043326):0.026563):0.025293,((((C  
ornufer\_guppyi:0.03209,Cornufer\_hedigeri:0.03209):0.121532,Cornufer\_vitianus:0.153622):0.03  
6336,Cornufer\_myersi:0.189957):0.043956,Cornufer\_guentheri:0.233914):0.017138,(Cornufer\_b  
ufoniformis:0.097105,Cornufer\_malukuna:0.097105):0.153947):0.026681):0.077534):0.075404,((  
(Alcalus\_baluensis:0.132337,Alcalus\_mariae:0.132337):0.084014,Alcalus\_rajae:0.216351):0.095  
242,Alcalus\_tasanae:0.311593):0.119077):0.024441,(((Liurana\_xizangensis:0.032609,Liurana\_m  
edogensis:0.032609):0.105273,Liurana\_alpina:0.137882):0.061158,Liurana\_vallecula:0.19904):0.  
25607);

## **Colubridae**

((Pseudoxenodon\_stejnegeri:0.193649,(Pseudoxenodon\_bambusicola:0.126207,(Pseudoxenodon\_  
karlschmidti:0.105897,Pseudoxenodon\_macrops:0.105897):0.02031):0.067442):0.329329,(((Hyps  
iglena\_torquata:0.408453,(Thermophis\_baileyi:0.057878,Thermophis\_zhaoermii:0.057878):0.350  
575):0.076305,(Thamnophis\_sirtalis:0.416029,(((Herpetoreas\_platyceps:0.186996,(Herpetoreas\_b  
urbrinki:0.1333,Hebius\_parallelum:0.1333):0.053696):0.056524,(Hebius\_craspedogaster:0.23020  
6,(Trachischium\_monticola:0.190114,(Trachischium\_guentheri:0.159252,Trachischium\_tenuiceps:  
0.159252):0.030862):0.040092):0.013314):0.144621,(Amphiesma\_stolatum:0.342912,(((Fowlea\_  
piscator:0.19437,Fowlea\_schnurrenbergeri:0.19437):0.040626,(Atretium\_yunnanensis:0.144214,(  
Fowlea\_flavipunctatus:0.104183,Xenochrophis\_punctulatus:0.104183):0.040031):0.090782):0.08  
4238,(Rhabdophis\_himalayanus:0.234925,((Rhabdophis\_subminiatus:0.17983,(Rhabdophis\_adler  
i:0.15128,Rhabdophis\_nigrocinctus:0.15128):0.02855):0.013393,(Rhabdophis\_tigrinus:0.164031,  
(Rhabdophis\_guangdongensis:0.099139,(Rhabdophis\_pentasupralabialis:0.068931,(Rhabdophis\_l  
eonardi:0.056367,Rhabdophis\_nuchalis:0.056367):0.012564):0.030208):0.064892):0.029192):0.0  
41702):0.084309):0.023679):0.045229):0.027888):0.068729):0.02546,(((Calamaria\_pavimentata:  
0.148077,Calamaria\_yunnanensis:0.148077):0.282847,(Sibynophis\_bistrigatus:0.342688,(Sibyno  
phis\_chinensis:0.181469,(Sibynophis\_collaris:0.092891,Sibynophis\_triangularis:0.092891):0.088  
578):0.161219):0.088235):0.05933,(((Ahaetulla\_prasina:0.241556,(Ahaetulla\_pulverulenta:0.219  
426,(Ahaetulla\_fronticincta:0.16471,Ahaetulla\_nasuta:0.16471):0.054716):0.02213):0.17217,((Ch  
rysopelea\_paradisi:0.294125,Chrysopelea\_taprobatica:0.294125):0.083693,((Dendrelaphis\_bifren  
alis:0.27137,Dendrelaphis\_subocularis:0.27137):0.045157,((Dendrelaphis\_caudolineatus:0.07792  
7,Dendrelaphis\_fuliginosus:0.077927):0.20938,(Dendrelaphis\_formosus:0.264324,((Dendrelaphis  
\_striatus:0.166611,(Dendrelaphis\_ngansonensis:0.041661,Dendrelaphis\_cyanochloris:0.04166100  
02315044):0.124949):0.068927,(Dendrelaphis\_haasi:0.139101,(Dendrelaphis\_marenae:0.001273,  
Dendrelaphis\_pictus:0.001273):0.137828):0.0964369996144772):0.028786):0.022983):0.029221):  
0.061291):0.035908):0.049444,(((Archelaphe\_bella:0.317692,Oreocryptophis\_porphyraceus:0.31  
7692):0.038448,((Elaphe\_hodgsoni:0.262531,(Elaphe\_taeniura:0.244662,(Elaphe\_moellendorffi:0.  
18103,Elaphe\_cantoris:0.181030004778862):0.063632):0.01787):0.048248,((Elaphe\_quatuorlinea  
ta:0.070572,Elaphe\_sauromates:0.070572):0.151625,((Elaphe\_bimaculata:0.13451,Elaphe\_dione:  
0.13451):0.064013,(Elaphe\_climacophora:0.184757,((Elaphe\_carinata:0.068986,Elaphe\_davidi:0.  
068986):0.100033,(Elaphe\_quadrivirgata:0.1448,Elaphe\_schrenckii:0.1448):0.024219):0.015738):  
0.013765):0.023675):0.088582):0.04536):0.047115,(((Ptyas\_korros:0.297485,((Ptyas\_carinata:0.2  
11785,Ptyas\_mucosa:0.211785):0.065746,((Ptyas\_dhumnades:0.058366,Ptyas\_nigromarginata:0.0  
58366):0.195326,(Ptyas\_fusca:0.178615,Ptyas\_luzonensis:0.178615):0.075077):0.023839):0.0199  
54):0.082962,(((Boiga\_forsteni:0.149802,Boiga\_cynodon:0.149802):0.167109,(Boiga\_trigonata:0.

289911,(Boiga\_ceylonensis:0.243756,(Boiga\_barnesii:0.171844,Boiga\_beddomei:0.171844):0.071912):0.046154):0.027001):0.036534,(Oligodon\_sublineatus:0.283351,(((Oligodon\_cruentatus:0.047791,Oligodon\_theobaldi:0.047791):0.060435,(Oligodon\_planiceps:0.055402,Oligodon\_torquatus:0.055402):0.052823):0.076072,((Oligodon\_cinereus:0.111973,(Oligodon\_nagao:0.053061,Oligodon\_sp:0.053061):0.058912):0.046082,(Oligodon\_lipipengi:0.141933,(Oligodon\_maculatus:0.083415,Oligodon\_splendidus:0.083415):0.058517):0.016122):0.026243):0.053349,((Oligodon\_ornatus:0.092199,Oligodon\_lacroixi:0.092199):0.113684,((Oligodon\_chinensis:0.041358,Oligodon\_ormosanus:0.041358):0.079932,(Oligodon\_cyclurus:0.103513,(Oligodon\_octolineatus:0.095134,(Oligodon\_taeinatus:0.076277,(Oligodon\_fasciolatus:0.060182,(Oligodon\_barroni:0.026354,Oligodon\_ocellatus:0.026354):0.033827):0.016096):0.018856):0.008379):0.017778):0.084593):0.031763):0.045705):0.070094):0.027002):0.009429,((Coelognathus\_radiatus:0.309945,(Coelognathus\_helena:0.27488,(Coelognathus\_erythrurus:0.182002,(Coelognathus\_flavolineatus:0.131576,Coelognathus\_subradiatus:0.131576):0.050426):0.092878):0.035065):0.068828,(Coluber\_constrictor:0.372251,(((Gonyosoma\_janseni:0.082514,Gonyosoma\_oxyccephalum:0.082514):0.232649,(Gonyosoma\_prasinum:0.216138,(Gonyosoma\_boulengeri:0.084256,Gonyosoma\_frenatum:0.084256):0.131881):0.099025):0.045582,(Lycodon\_paucifasciatus:0.330888,((Lycodon\_carinatus:0.207808,Lycodon\_laoensis:0.207808):0.108759,((Lycodon\_ruhstrati:0.257378,(Lycodon\_dumerilii:0.180582,(Lycodon\_muelleri:0.148105,(Lycodon\_bibonius:0.037841,(Lycodon\_alcalai:0.005561,Lycodon\_chrysoprateros:0.005561):0.032281):0.110264):0.032476):0.076796):0.045754,((Lycodon\_effraensis:0.256686,(Lycodon\_jara:0.190153,(Lycodon\_aulicus:0.097792,Lycodon\_zawi:0.097792):0.092361):0.066533):0.028707,((Lycodon\_synaptor:0.187747,(Lycodon\_gongshan:0.125325,((Lycodon\_butleri:0.0824,Lycodon\_cavernicolus:0.0824):0.030815,Lycodon\_fasciatus:0.113214000617504):0.012111):0.062422):0.07142,((Lycodon\_stormi:0.188749,Lycodon\_subcinctus:0.188749):0.031287,((Lycodon\_futsingensis:0.079124,Lycodon\_septentrionalis:0.079124):0.0607,(Lycodon\_rufozonatus:0.108353,Lycodon\_meridionalis:0.108352999994278):0.031471):0.080211):0.039131):0.026225):0.01774):0.013435):0.01432):0.029857):0.011506):0.006523):0.011104):0.013377):0.059916):0.027083):0.019964):0.01276);

### **Dicroglossidae**

((((((((((((Fejervarya\_multistriata:0.064752,Fejervarya\_sakishimensis:0.064752):0.042469,Fejervarya\_iskandari:0.107221):0.038855,Fejervarya\_triora:0.146076):0.03003,Fejervarya\_limnocharis:0.176106):0.062969,Fejervarya\_cancrivora:0.239074):0.06576,(((Sphaerotheca\_breviceps:0.019135,Sphaerotheca\_pluvialis:0.019135):0.092758,Sphaerotheca\_dobsonii:0.111893):0.082088,Sphaerotheca\_rolandae:0.193981):0.110854):0.013196,(((Minervarya\_pierrei:0.063672,Minervarya\_syhadrensis:0.063672):0.057228,Minervarya\_greenii:0.120901):0.032831,Minervarya\_caperata:0.153731):0.164299):0.065577,((((Hoplobatrachus\_crassus:0.09473,Hoplobatrachus\_tigerinus:0.09473):0.030359,Hoplobatrachus\_rugulosus:0.125088):0.071106,Hoplobatrachus\_occipitalis:0.196194):0.046022,Euphlyctis\_cyanophlyctis:0.242216):0.044648,Euphlyctis\_hexadactylus:0.286864):0.047213,Nannophrys\_ceylonensis:0.334077):0.04953):0.09867,(((Limnonectes\_fujianensis:0.118888,Limnonectes\_kuhlii:0.118888):0.115431,Limnonectes\_fragilis:0.234319):0.036974,(Limnonectes\_deinodon:0.221556,Limnonectes\_limborgi:0.221556):0.049737):0.047372,(((Limnonectes\_finchi:0.155458,Limnonectes\_poilani:0.155458):0.047416,Limnonectes\_grunniens:0.202873):0.03648,(Limnonectes\_magnus:0.111681,Limnonectes\_modestus:0.111681):0.127673):0.079312):0.163611):0.021098,((((((((Nanorana\_arnoldi:0.004514,Nanorana\_chayuensis:0.004514):0.014484,Nan

orana\_maculosa:0.018998):0.014969,Nanorana\_medogensis:0.033967):0.029611,(Nanorana\_conaensis:0.045451,Nanorana\_blanfordii:0.045451):0.018128):0.021771,((Nanorana\_polunini:0.016705,Nanorana\_rostandi:0.016705):0.028359,Nanorana\_liebigii:0.045064):0.040285):0.039608,((Nanorana\_pleskei:0.041094,Nanorana\_ventripunctata:0.041094):0.034598,Nanorana\_parkeri:0.075692):0.049265):0.018532,(((Nanorana\_aenea:0.070351,Nanorana\_unculuanus:0.070351):0.032384,(Nanorana\_bourreti:0.030177,Nanorana\_yunnanensis:0.030177):0.072558):0.021804,(Nanorana\_quadranus:0.103542,Nanorana\_taihangnica:0.103542):0.020998):0.018949):0.078439,(((Quasipaa\_boulengeri:0.068885,Quasipaa\_spinosa:0.068885):0.032745,Quasipaa\_shini:0.10163):0.013537,Quasipaa\_yei:0.115167):0.035918,Quasipaa\_verrucospinosa:0.151085):0.070843):0.281447):0.06447,((((Occidozyga\_laevis:0.25994,Occidozyga\_martensii:0.25994):0.056097,Occidozyga\_baluen sis:0.316037):0.062397,Occidozyga\_lima:0.378434):0.079862,(Ingerana\_borealis:0.181083,Ingerana\_tenasserimensis:0.181083):0.277213):0.109549);

## Elapidae

((((((((((((((((Hoplocephalus\_bitorquatus:0.100408,Paroplocephalus\_atriceps:0.100408):0.039832,(Notechis\_scutatus:0.057908,Tropidechis\_carinatus:0.057908):0.082332):0.03797,Austrelaps\_sup erbus:0.178211):0.023795,Drysdalia\_coronoides:0.202006):0.039266,Echiopsis\_curta:0.241272):0.015764,Hemiaspis\_dameli:0.257037):0.021134,(((Hydrelaps\_darwiniensis:0.169631,Hydrophis\_cyanocinctus:0.169631):0.014007,(Ephalophis\_greya:0.116568,Parahydrophis\_mertoni:0.116568):0.06707):0.035262,(Aipysurus\_laevis:0.121515,Emydocephalus\_annulatus:0.121515):0.097385):0.05927):0.026387,(((Parasuta\_monachus:0.158849,Suta\_suta:0.158849):0.061776,Elapognathus\_coronatus:0.220625):0.025223,(Cryptophis\_nigrescens:0.186564,Rhinoplocephalus\_bicolor:0.186564):0.059283):0.039556,Cacophis\_squamulosus:0.285404):0.019154):0.017921,((((Denisonia\_devisi:0.213281,Pseudechis\_australis:0.213281):0.054098,(Neelaps\_calonotus:0.231136,Ver micella\_intermedia:0.231136):0.036242):0.013263,(Oxyuranus\_microlepidotus:0.18646,Pseudonaja\_textilis:0.18646):0.094183):0.010902,(Aspidomorphus\_muelleri:0.244635,Furina\_diadema:0.244635):0.04691):0.013565,Acanthophis\_praelongus:0.305109):0.007255,(Brachyurophissemifasciatus:0.251651,Simoselaps\_anomalus:0.251651):0.060714):0.010114):0.019239,(Demansia\_papue nsis:0.221266,Toxicocalamus\_preussi:0.221266):0.120452):0.016507,Micropechis\_ikaheka:0.358224):0.02155,Laticauda\_colubrina:0.379774):0.039979,((((((((Bungarus\_candidus:0.066612,Bungarus\_multicinctus:0.066612):0.061165,Bungarus\_niger:0.127777):0.051899,(Bungarus\_caeruleus:0.127587,Bungarus\_sindanus:0.127587):0.052088):0.052149,Bungarus\_fasciatus:0.231825):0.047009,Bungarus\_ceylonicus:0.278834):0.05211,(Bungarus\_bungaroides:0.098076,Bungarus\_slowi nskii:0.098076):0.232868):0.047785,Bungarus\_flaviceps:0.378729):0.041024):0.008922,((((((((N aja\_annulifera:0.03095,Naja\_haje:0.03095):0.064507,Naja\_nivea:0.095457):0.104735,((Naja\_melanoleuca:0.128735,Naja\_annulata:0.128735):0.025014,Naja\_multifasciata:0.15375):0.046443):0.033648,(((Naja\_ashei:0.04419,Naja\_mossambica:0.04419):0.018505,Naja\_nigricollis:0.062695):0.042683,Naja\_katiensis:0.105377):0.057786,(Naja\_nubiae:0.103062,Naja\_pallida:0.103062):0.060101):0.070677):0.019048,(((Naja\_atra:0.07887,Naja\_kaouthia:0.07887):0.011773,(Naja\_siamensis:0.046613,Naja\_sumatrana:0.046613):0.04403):0.02406,Naja\_naja:0.114703):0.138186):0.025765,Hemachatus\_haemachatus:0.278653):0.056257,(Aspidelaps\_scutatus:0.280203,Walterinnesia\_egyptia:0.280203):0.054708):0.065365,(((Dendroaspis\_angusticeps:0.316527,Ophiophagus\_hannah:0.316527):0.035416,Elapsoidea\_semiannulata:0.351943):0.026364,(Hemibungarus\_calligaster:0.290603,Calliophis\_bibroni:0.290603):0.087704):0.02197):0.028399):0.007257,((((Sinomicrurus

\_maccllelandi:0.168413,Sinomicrurus\_kelloggii:0.168413):0.081688,Sinomicrurus\_japonicus:0.250101):0.117122,Micrurus\_surinamensis:0.367222):0.041054,Micruroides\_euryxanthus:0.408276):0.027656):0.021212,(((Calliophis\_castoe:0.18369,Calliophis\_nigrescens:0.18369):0.123815,Calliophis\_melanurus:0.307506):0.10904,(Calliophis\_bivirgata:0.284359,Calliophis\_intestinalis:0.284359):0.132187):0.040598);

### **Gekkonidae**

((Alsophylax\_pipiens:0.759255,Microgecko\_persicus:0.759255):0.065634,(((Calodactylodes\_illingworthorum:0.746996,(Chondrodactylus\_fitzsimonsi:0.646981,Homopholis\_walbergii:0.646981):0.062535,(Phelsuma\_inexpectata:0.18113,Phelsuma\_rosagularis:0.18113):0.528386):0.03748):0.049408,(Dixonius\_vietnamensis:0.663639,Nactus\_vankampeni:0.663639):0.114176,(Gehyra\_mutilata:0.670201,(((Hemiphyllodactylus\_bintik:0.160727,Hemiphyllodactylus\_harterti:0.160727):0.275982,(Hemiphyllodactylus\_titiwangsaensis:0.28322,(Hemiphyllodactylus\_larutensis:0.106881,Hemiphyllodactylus\_teharik:0.106881):0.176339):0.153489):0.123737,(Hemiphyllodactylus\_ganoklonis:0.27536,(Hemiphyllodactylus\_insularis:0.21351,Hemiphyllodactylus\_typus:0.21351):0.06185):0.170937,(Hemiphyllodactylus\_aurantiacus:0.411384,(Hemiphyllodactylus\_banaensis:0.17604,Hemiphyllodactylus\_dushanensis:0.17604):0.207609,(Hemiphyllodactylus\_chiangmaiensis:0.188825,(Hemiphyllodactylus\_yunnanensis:0.149199,Hemiphyllodactylus\_jinpingensis:0.149199):0.039626):0.075843,(Hemiphyllodactylus\_longlingensis:0.217313,(Hemiphyllodactylus\_zayuensis:0.149772,Hemiphyllodactylus\_changningensis:0.149772):0.067541):0.047355):0.118981):0.027735):0.034913):0.114148):0.109755):0.107614):0.01859):0.017167,(((Lepidodactylus\_orientalis:0.486626,(Lepidodactylus\_lugubris:0.437388,Luperosaurus\_cumingii:0.437388):0.049238):0.162517,(Gekko\_monarchus:0.530417,(Gekko\_vittatus:0.480955,(Gecko\_smithi:0.194568,Gekko\_gecko:0.194568):0.286386):0.049462):0.118726):0.144628,(((Altiphylax\_stolickzai:0.261474,Altiphylax\_medogensis:0.261474):0.28936,(Altiphylax\_levitoni:0.495353,(Mediodactylus\_russowii:0.425595,Tropiocolotes\_nubicus:0.425595):0.069758):0.041088,(Cyrtopodion\_mansarulus:0.285239,Cyrtopodion\_scabrum:0.285239):0.118716,(Tenuidactylus\_caspicus:0.365761,(Crossobamon\_orientalis:0.322603,Cyrtopodion\_aravallensis:0.322603):0.043158):0.038194):0.132485):0.014395):0.181732,((Hemidactylus\_anamallensis:0.658436,(((Hemidactylus\_aaronbaueri:0.320593,(Hemidactylus\_depressus:0.226104,(Hemidactylus\_triedrus:0.173678,(Hemidactylus\_maculatus:0.10481,Hemidactylus\_prashadi:0.10481):0.068868):0.052426):0.094489):0.136119,(Hemidactylus\_leschenaulti:0.140406,Hemidactylus\_flaviviridis:0.140406):0.295188,(Hemidactylus\_frenatus:0.352722,(Hemidactylus\_brookii:0.245837,(Hemidactylus\_gracilis:0.154203,Hemidactylus\_imbricatus:0.154203):0.091634):0.106885):0.082871):0.021119):0.072145,(((Hemidactylus\_craspedotus:0.283712,Hemidactylus\_platyurus:0.283712):0.052897,(Hemidactylus\_karenorum:0.142528,Hemidactylus\_giganteus:0.142528):0.11895,(Hemidactylus\_garnotii:0.236527,(Hemidactylus\_aquilonius:0.102022,Hemidactylus\_bowringii:0.102022):0.134505):0.02495):0.075132):0.173431,(Hemidactylus\_fasciatus:0.443659,(Hemidactylus\_persicus:0.240134,Hemidactylus\_robustus:0.240134):0.203525):0.047251,(Hemidactylus\_angulatus:0.450801,(Hemidactylus\_mabouia:0.338735,(Hemidactylus\_palaichthus:0.275599,(Hemidactylus\_brasilianus:0.191929,Hemidactylus\_greeffii:0.191929):0.08367):0.063136):0.112066):0.040109):0.01913):0.018817):0.129579):0.027688,(((Cyrtodactylus\_tibetanus:0.233137,Cyrtodactylus\_zhaoermii:0.233137):0.320952,(((Cyrtodactylus\_battalensis:0.176653,Cyrtodactylus\_chamba:0.176653):0.038985,(Cyrtodactylus\_himalayanus:0.18346,Cyrtodactylus\_lawderanus:0.18346):0.032178):0.338451):0.061403,(((Cyrtodactylus\_russelli:0.096623,

Cyrtodactylus\_slowinskii:0.096623):0.36626,(Cyrtodactylus\_fasciolatus:0.448682,(((Cyrtodactylus\_annandalei:0.126573,Cyrtodactylus\_feae:0.126573):0.250995,(Cyrtodactylus\_sp\_Khelong:0.260491,(Cyrtodactylus\_gubernatoris:0.171309,Cyrtodactylus\_sp\_Sikkim:0.171309):0.089182):0.117077):0.040536,((Cyrtodactylus\_cayuensis:0.036395,Cyrtodactylus\_sp\_Glow:0.036395):0.32851,(Cyrtodactylus\_brevidactylus:0.336078,((Cyrtodactylus\_kazirangaensis:0.228651,((Cyrtodactylus\_ayeyarwadyensis:0.09184,Cyrtodactylus\_tripuraensis:0.09184):0.097593,(Cyrtodactylus\_khasiensis:0.161943,(Cyrtodactylus\_guwahatiensis:0.06199,Cyrtodactylus\_septentrionalis:0.06199):0.099953):0.027489):0.039219):0.086295,(Cyrtodactylus\_sp\_CHNG:0.300127,(Cyrtodactylus\_nagalensis:0.255779,(Cyrtodactylus\_gansi:0.239276,(Cyrtodactylus\_jaintiaensis:0.206237,(Cyrtodactylus\_sp\_Mizoram:0.09114,Cyrtodactylus\_montanus:0.09114):0.115096):0.033039):0.016503):0.044347):0.014819):0.021132):0.028826):0.0532):0.030577):0.014201):0.087908,((Cyrtodactylus\_jarujini:0.326911,(Cyrtodactylus\_angularis:0.295762,Cyrtodactylus\_chanhomeae:0.295762):0.03115):0.165282,(((Cyrtodactylus\_philippinicus:0.333988,(Cyrtodactylus\_paradoxus:0.007877,Cyrtodactylus\_chrysopylos:0.007877):0.326111):0.047213,((Cyrtodactylus\_jellesmae:0.311848,(Cyrtodactylus\_sadlieri:0.233526,Cyrtodactylus\_sp\_Timor:0.233526):0.078323):0.041523,(Cyrtodactylus\_quadrivirgatus:0.328104,(Cyrtodactylus\_rubidus:0.293205,(Cyrtodactylus\_tiomansensis:0.242627,(Cyrtodactylus\_semenanjungensis:0.060939,Cyrtodactylus\_adleri:0.060939):0.181687):0.050578):0.0349):0.025267):0.02783):0.075856,((Cyrtodactylus\_triedra:0.402873,(Cyrtodactylus\_deccanensis:0.29326,Cyrtodactylus\_collegalensis:0.29326):0.109614):0.036267,(((Cyrtodactylus\_bintangtinggi:0.141595,Cyrtodactylus\_pulchellus:0.141595):0.233879,(Cyrtodactylus\_elok:0.21711,Cyrtodactylus\_interdigitalis:0.21711):0.158365):0.042013,((Cyrtodactylus\_hontreensis:0.242286,Cyrtodactylus\_intermedius:0.242286):0.156054,((Cyrtodactylus\_novaeguineae:0.296774,(Cyrtodactylus\_loriae:0.245333,Cyrtodactylus\_sermowaiensis:0.245333):0.051441):0.065898,(Cyrtodactylus\_tigroides:0.283221,(Cyrtodactylus\_peguensis:0.223462,Cyrtodactylus\_oldhami:0.223462):0.059758):0.079451):0.035668):0.019148):0.021653):0.017917):0.035136):0.058598):0.064701):0.070631):0.046444):0.061204):0.0198):0.011318);

## **Megophryidae**

((((((((((((((((((Megophrys\_sangzhiensis:0.023862,Megophrys\_spinata:0.023862):0.024713,Megophrys\_binlingensis:0.048575):0.020433,(Megophrys\_binchuanensis:0.055068,Megophrys\_omeimontis:0.055068):0.013941):0.014207,Megophrys\_jingdongensis:0.083215):0.011967,Megophrys\_palpebralespinosa:0.095182):0.01349,Megophrys\_wuliangshanensis:0.108672):0.016082,Megophrys\_daweimontis:0.124755):0.03689,Megophrys\_minor:0.161645):0.017186,(((Megophrys\_brachykolos:0.067479,Megophrys\_lini:0.067479):0.021585,Megophrys\_jinggangensis:0.089064):0.021281,(Megophrys\_boettgeri:0.023198,Megophrys\_huangshanensis:0.023198):0.087147):0.013915,((Megophrys\_baolongensis:0.047318,Megophrys\_wushanensis:0.047318):0.037967,Megophrys\_tuberogranulatus:0.085286):0.038974):0.054571):0.057888,(Ophryophryne\_hansi:0.103829,Ophryophryne\_microstoma:0.103829):0.13289):0.020592,(Megophrys\_pachyproctus:0.129493,Megophrys\_vegrandis:0.129493):0.127818):0.025881,((((((((Megophrys\_mangshanensis:0.034481,Megophrys\_maosonensis:0.034481):0.050702,Megophrys\_major:0.085183):0.01744,Megophrys\_flavipunctata:0.102623):0.013694,(Megophrys\_glandulosa:0.086287,Megophrys\_periosa:0.086287):0.030029):0.016793,(((Megophrys\_medogensis:0.048168,Megophrys\_robusta:0.048168):0.050447,Megophrys\_zhangi:0.098615):0.021228,Megophrys\_himalayana:0.119843):0.013266):0.0285,Megophrys\_oreocrypta:0.16161):0.043168,(((Megophrys\_ancrae:0.105861,Megophrys\_serchhipii:0.10

5861):0.02312,(Megophrys\_oropedion:0.101222,Megophrys\_zunhebotensis:0.101222):0.027759):0.035818,Megophrys\_megacephala:0.164799):0.039978):0.02118,Megophrys\_parva:0.225957):0.032499,Megophrys\_aceras:0.258456):0.024736):0.021564,(((Borneophrys\_edwardinae:0.101334,Megophrys\_ligayae:0.101334):0.048001,Megophrys\_nasuta:0.149335):0.042604,Megophrys\_stejnegeri:0.191939):0.086514,Megophrys\_montana:0.278452):0.026303):0.015893,(((Megophrys\_gigantica:0.050284,Megophrys\_shapingensis:0.050284):0.029825,Megophrys\_wawuensis:0.080108):0.186514,(Brachytarsophrys\_carinense:0.083221,Brachytarsophrys\_feae:0.083221):0.183401):0.054026):0.101913,((((((((Scutigera\_boulengeri:0.011197,Scutigera\_mammatus:0.011197):0.040164,Scutigera\_liupanensis:0.051360009262562):0.010158,Scutigera\_tuberculatus:0.061519):0.01181,Scutigera\_glandulatus:0.073329):0.03839,Scutigera\_occidentalis:0.111719):0.015692,(((Scutigera\_nyingchiensis:0.050736,Scutigera\_gongshanensis:0.050736):0.023991,Scutigera\_spinosus:0.074728):0.029566,Scutigera\_nepalensis:0.104294):0.010076,Scutigera\_sikkimensis:0.11437):0.013042):0.015264,(Scutigera\_chintingensis:0.111392,Scutigera\_ningshanensis:0.111392):0.031283):0.055006,Scutigera\_wuguanfui:0.197682):0.098171,(((Leptobrachium\_hainanense:0.05584,Leptobrachium\_ngoehense:0.05584):0.058829,Leptobrachium\_banae:0.11467):0.103629,((Leptobrachium\_boringii:0.085528,Leptobrachium\_huashen:0.085528):0.095653,Leptobrachium\_bompu:0.181181):0.037118):0.038042,((Leptobrachium\_hasseltii:0.09162,Leptobrachium\_hendricksoni:0.09162):0.105253,Leptobrachium\_smithi:0.196873):0.059468):0.039511):0.059477,(Leptolalax\_oshanensis:0.160979,Leptolalax\_ventripunctatus:0.160979):0.194351):0.067232);

#### **Pareidae**

(((((((Pareas\_formosensis:0.050645,Pareas\_hamptoni:0.050645):0.231222995761871,((Pareas\_atayal:0.111048,Pareas\_iwasakii:0.111048):0.026257,Pareas\_komaii:0.137305):0.144562):0.129184,((Pareas\_boulengeri:0.182013,Pareas\_chinensis:0.182013):0.155858,Pareas\_stanleyi:0.337871):0.07318):0.044368,Pareas\_margaritophorus:0.455418998137474):0.057758,Pareas\_monticola:0.513178002717972):0.08866,((Pareas\_carinatus:0.377818,Pareas\_nuchalis:0.377818):0.154372,Aplopeltura\_boa:0.532191):0.069647):0.051149,((Asthenodipsas\_laevis:0.136827,Asthenodipsas\_malaccanus:0.136827):0.420271,(Asthenodipsas\_tropidonotus:0.185642,Asthenodipsas\_vertrebralis:0.185642):0.371455):0.095889);

#### **Ranidae**

((((((((((((((((Hylarana\_indica:0.046459,Hylarana\_sreeni:0.046459):0.02851,Hylarana\_caesari:0.074969):0.055357,Hylarana\_magna:0.130326):0.013426,Hylarana\_montana:0.143753):0.021781,Hylarana\_flavescens:0.165534):0.020837,((Hylarana\_aurantiaca:0.080828,Hylarana\_urbis:0.080828):0.017451,(Hylarana\_doni:0.065386,Hylarana\_intermedia:0.065386):0.032892):0.088092):0.069762,(Hylarana\_serendipi:0.192168,Hylarana\_temporalis:0.192168):0.063965):0.057653,((((Hylarana\_aurata:0.078696,Hylarana\_volkerjane:0.078696):0.021944,Hylarana\_supragrisea:0.10064):0.023581,Hylarana\_milneana:0.12422):0.047927,(Hylarana\_jimiensis:0.109959,Hylarana\_arfaki:0.109959):0.062188):0.008603,(Hylarana\_kreffti:0.05816,Hylarana\_papua:0.05816):0.12259):0.016537,((Hylarana\_garritor:0.098975,Hylarana\_waliesia:0.098975):0.075671,Hylarana\_daemeli:0.174645):0.022642):0.116499):0.014599,(((Hylarana\_mortenseni:0.007282,Hylarana\_faber:0.007282):0.219971995563745,(((Hylarana\_maosonensis:0.038402,Hylarana\_spinulosa:0.038402):0.029705,Hylarana\_latouchii:0.068107):0.092623,Hylarana\_cubitalis:0.16073):0.066525):0.04402,((Hylarana\_bahuvistara:0.014455,Hylarana\_malabaricus:0.014455):0.130477,Hylarana\_nigrovittat



a:0.144932):0.040448,Hylarana\_gracilis:0.18538):0.085894):0.038557,((Hylarana\_attigua:0.154507,Hylarana\_milleti:0.154507):0.071973,Hylarana\_galamensis:0.22648):0.083352):0.018553):0.022978,(((Pelophylax\_lateralis:0.171086,Hylarana\_miopus:0.171086):0.070929,Hylarana\_guentheri:0.242014):0.033688,Hylarana\_humeralis:0.275702):0.027585,((Hylarana\_erythraea:0.054623,Hylarana\_tytleri:0.054623):0.138927,(Hylarana\_macroductyla:0.116423,Hylarana\_taipehensis:0.116423):0.077127):0.109737):0.048075):0.007304,(((((((Hylarana\_grandocula:0.038167,Hylarana\_similis:0.038167):0.037682,Hylarana\_melanomenta:0.075849):0.057434,(Hylarana\_mangyanum:0.057307,Hylarana\_moellendorffi:0.057307):0.075976):0.074486,(Hylarana\_picturata:0.091376,Hylarana\_signata:0.091376):0.116392):0.026361,(Hylarana\_banjarana:0.192993,Hylarana\_siberu:0.192993):0.041137):0.033209,(((Hylarana\_glandulosa:0.006796,Hylarana\_baramica:0.006796):0.059468,Hylarana\_laterimaculata:0.066264):0.134461,Hylarana\_rawa:0.200725):0.066613):0.024167,(((Hylarana\_amicola:0.090667,Hylarana\_darlingi:0.090667):0.053301,Hylarana\_albolabris:0.143968):0.056886,Hylarana\_lepus:0.200854):0.090651):0.04151,(((((((Hylarana\_chalconota:0.018626,Hylarana\_megalonesa:0.018626):0.006451,Hylarana\_eschatia:0.025076):0.038002,Hylarana\_parvaccola:0.063079):0.082078,Hylarana\_mocquardi:0.145156):0.047518,Hylarana\_rufipes:0.192674):0.092409,Hylarana\_nicobariensis:0.285083):0.047932):0.025652):0.00894,Hylarana\_leptoglossa:0.367606):0.011184,((Babina\_chapaensis:0.106296,Babina\_okinavana:0.106296):0.067393,Babina\_pleuraden:0.173688):0.205102):0.015981,((((Glandirana\_emeljanovi:0.139745,Glandirana\_rugosa:0.139745):0.05985,Glandirana\_tientaiensis:0.199595):0.098721,(Sanguirana\_luzonensis:0.1667,Sanguirana\_sanguinea:0.1667):0.131616):0.046996,Abavorana\_luctuosa:0.345312):0.049459):0.013845,((((((((Odorrana\_amamiensis:0.03513,Odorrana\_narina:0.03513):0.031073,Odorrana\_supranarina:0.066203):0.052859,(Odorrana\_swinhoana:0.044523,Odorrana\_utsunomiyaorum:0.044523):0.074539):0.05008,(((Odorrana\_exiliversabilis:0.043825,Odorrana\_nasuta:0.043825):0.066413,Odorrana\_tormota:0.110238):0.02447,(Odorrana\_nasica:0.053895,Odorrana\_versabilis:0.053895):0.080813):0.034434):0.026583,((((Odorrana\_aureola:0.045005,Odorrana\_livida:0.045005):0.030096,Odorrana\_chloronota:0.075101):0.015305,(Odorrana\_graminea:0.078031,Odorrana\_leporipes:0.078031):0.012376):0.04022,Odorrana\_hosii:0.130627):0.041131,(Odorrana\_morafkai:0.139727,Odorrana\_banaorum:0.139727):0.032031):0.023967):0.017045,Odorrana\_tiannanensis:0.21277):0.026335,((((Odorrana\_hejiangensis:0.013795,Odorrana\_nanjiangensis:0.013795):0.055324,Odorrana\_bacboensis:0.069119):0.051193,(Odorrana\_fengkaiensis:0.02341,Odorrana\_hainanensis:0.02341):0.096902):0.02612,(Odorrana\_huanggangensis:0.044936,Odorrana\_tianmuyii:0.044936):0.101496):0.024116,Odorrana\_schmackeri:0.170548):0.068557):0.016412,((((Odorrana\_andersonii:0.023563,Odorrana\_jingdongensis:0.023563):0.019753,Odorrana\_junlianensis:0.0433159995943308):0.022785,Odorrana\_margaretae:0.066101):0.013762,Odorrana\_kuangwuensis:0.079863):0.055335,(Odorrana\_mutschmanni:0.084499,Odorrana\_wuchuanensis:0.084499):0.050699):0.037918,(((Odorrana\_anlungensis:0.075369,Odorrana\_yizhangensis:0.075369):0.015689,Odorrana\_lungshengensis:0.091058):0.05051,Odorrana\_lipuensis:0.141567):0.031549):0.046597,(Odorrana\_chapaensis:0.145767,Odorrana\_geminata:0.145767):0.073946):0.035804):0.024355,Odorrana\_ishikawae:0.279873):0.023115,Odorrana\_absita:0.302988):0.079028,(((Rana\_catesbeianus:0.161843,Rana\_septentrionalis:0.161843):0.096886,(Rana\_pipiens:0.177412,Rana\_tlaloci:0.177412):0.081318):0.058739,(Rana\_kukunoris:0.209132,Rana\_temporaria:0.209132):0.108336):0.024366,Pseudorana\_weiningensis:0.341834):0.040182):0.0266):0.026761,((Pelophylax\_ridibundus:0.267273,Pelophylax\_saharicus:0.267273):0.121221,Pelophylax\_nigromaculatus:0.388494):0.046882):0.011757,((((((((Amolops\_iriodes:0.019238,Amolops\_mengyangensis:0.019238):0.01328,

Amolops\_daorum:0.032518):0.055072,(Amolops\_akhaorum:0.069636,Amolops\_archotaphus:0.069636):0.017954):0.037051,(((Amolops\_compotrix:0.040044,Amolops\_cucae:0.040044):0.039348,Amolops\_vitreus:0.079392):0.032659,Amolops\_chunganensis:0.112051):0.012591):0.012894,((Amolops\_bellulus:0.058083,Amolops\_nyingchiensis:0.058083):0.052814,Amolops\_aniqiaoensis:0.110896):0.026639):0.033933,((((Amolops\_jinjiangensis:0.021779,Amolops\_tuberodepressus:0.021779):0.017018,Amolops\_loloensis:0.038797):0.013546,Amolops\_mantzorum:0.052343):0.07308,Amolops\_liangshanensis:0.059651):0.057053,(Amolops\_granulosus:0.008827,Amolops\_lifanensis:0.008827):0.107877):0.027541,Amolops\_chayuensis:0.144245):0.027223):0.024131,((Amolops\_viridimaculatus:0.076585,Amolops\_beibengensis:0.076585):0.043919,Amolops\_medogensis:0.120505):0.075094):0.023611,(((Amolops\_sp.:0.070998,Amolops\_gyirongensis:0.070998):0.023378,Amolops\_wangyufani:0.094376):0.012049,Amolops\_deng:0.106426):0.112784):0.114817,((((Amolops\_indoburmanensis:0.115254,Amolops\_afghanus:0.115254):0.064079,Amolops\_marmoratus:0.179333):0.034874,Amolops\_yarlungzangbo:0.214207):0.038116,Amolops\_panghai:0.252323):0.081704):0.018944,(Amolops\_larutensis:0.259894,Amolops\_cremnobatus:0.259894):0.093076):0.025588,((((Amolops\_ricketti:0.054304,Amolops\_albispinus:0.054304):0.049632,Amolops\_wuyiensis:0.103936):0.133322,(Amolops\_daiyunensis:0.079541,Amolops\_hongkongensis:0.079541):0.157717):0.065708,(Amolops\_hainanensis:0.140627,Amolops\_torrentis:0.140627):0.16234):0.041795,Amolops\_spinapectoralis:0.344761):0.033797):0.068576):0.016422,((((Meristogenys\_dyscritus:0.068077,Meristogenys\_maryatiae:0.068077):0.018227,Meristogenys\_stigmachilus:0.086304):0.011159,Meristogenys\_poecilus:0.097463):0.011106,(Meristogenys\_amoropalamus:0.084831,Meristogenys\_stenocephalus:0.084831):0.023738):0.231069,(Huia\_cavitympanum:0.0935900013751984,Huia\_masonii:0.093589):0.246048):0.027229,((Clinotarsus\_alticola:0.147843,Clinotarsus\_curtipes:0.147843):0.16937,Huia\_melasma:0.317213):0.049653):0.09669):0.05106,((Stauroids\_guttatus:0.133828,Stauroids\_natator:0.133828):0.049804,Stauroids\_latopalmatum:0.183631):0.330985);

### **Rhacophoridae**

((((((((((((((((((((Raorchestes\_luteolus:0.039224,Raorchestes\_travancoricus:0.039224):0.078659,(Raorchestes\_agasthyaensis:0.057299,Raorchestes\_kadalarensis:0.057299):0.060583):0.011013,Raorchestes\_chlorosomma:0.128896):0.023342,(((Raorchestes\_kaikatti:0.045451,Raorchestes\_kakachi:0.045451):0.036441,Raorchestes\_sushili:0.081892):0.035215,Raorchestes\_anili:0.117107):0.03513):0.023252,(((Raorchestes\_beddomii:0.051797,Raorchestes\_theuerkaufi:0.051797):0.058988,Raorchestes\_munnarensis:0.110785):0.009511,Raorchestes\_resplendens:0.120296):0.0232,Raorchestes\_dubois:0.143497):0.031993):0.016945,(((Raorchestes\_chalazodes:0.030836,Raorchestes\_flaviocularis:0.030836):0.019813,Raorchestes\_ochlandrae:0.050649):0.105645,(Raorchestes\_mahari:0.04021,Raorchestes\_uthamani:0.04021):0.116084):0.036141):0.040888,((Raorchestes\_blandus:0.147332,Raorchestes\_arceos:0.147332):0.037926,Raorchestes\_chotta:0.185257):0.048065):0.023935,((((Raorchestes\_glandulosus:0.07336,Raorchestes\_jayarami:0.07336):0.026669,Raorchestes\_bobingeri:0.100029):0.029463,Raorchestes\_akroparallagi:0.129492):0.03997,(Raorchestes\_graminirupes:0.080313,Raorchestes\_johnceei:0.080313):0.089149):0.012694,Raorchestes\_crustai:0.182156):0.038448,Raorchestes\_nerostagona:0.220604):0.036653):0.035286,((((((((Raorchestes\_menglaensis:0.056806,Raorchestes\_parvulus:0.056806):0.027918,Raorchestes\_gryllus:0.084724):0.01057,Raorchestes\_longchuanensis:0.095295):0.039324,((Raorchestes\_bombayensis:0.069776,Raorchestes\_leucolatus:0.069776):0.019843,Raorchestes\_tuberohumerus:0.089619):0.044999):

0.024457,Raorchestes\_ghatei:0.159075):0.034731,((Raorchestes\_hassanensis:0.051004,Raorchestes\_ponmudi:0.051004):0.041384,Raorchestes\_flaviventris:0.092389):0.101418):0.0121,Raorchestes\_indigo:0.205906):0.020747,Raorchestes\_echinatus:0.226654):0.011413,((((Raorchestes\_aureus:0.057913,Raorchestes\_lechiya:0.057913):0.055562,Raorchestes\_signatus:0.113475):0.022165,(Raorchestes\_chromasynchysi:0.060257,Raorchestes\_silentvalley:0.060257):0.075383):0.015682,(Raorchestes\_primarrumpfi:0.055661,Raorchestes\_tinniens:0.055661):0.09566):0.043736,(((Raorchestes\_charius:0.065508,Raorchestes\_honnametti:0.065508):0.042623,Raorchestes\_griet:0.108131):0.019773,Raorchestes\_coonoorensis:0.127903):0.046938,Raorchestes\_markii:0.174842):0.020216):0.043009):0.054477):0.033894,(((((((Pseudophilautus\_amboli:0.01198,Pseudophilautus\_leucorhinus:0.01198):0.03794,Pseudophilautus\_wynaadensis:0.04992):0.036579,Pseudophilautus\_kani:0.0865):0.061954,Pseudophilautus\_folicola:0.148454):0.035476,((Pseudophilautus\_limbus:0.132027,Pseudophilautus\_zorro:0.132027):0.037128,(Pseudophilautus\_schneideri:0.085003,Pseudophilautus\_simba:0.085003):0.084152):0.014775):0.027367,((((Pseudophilautus\_asankai:0.024861,Pseudophilautus\_hoffmanni:0.024861):0.074865,Pseudophilautus\_pleurotaenia:0.099726):0.038674,Pseudophilautus\_ocularis:0.1384):0.02627,(Pseudophilautus\_decoris:0.030508,Pseudophilautus\_mittermeieri:0.030508):0.134161):0.017971,Pseudophilautus\_tanu:0.18264):0.028657):0.023768,(((((((Pseudophilautus\_hankeni:0.032732,Pseudophilautus\_dilmah:0.032732):0.01603,Pseudophilautus\_schmarda:0.048763):0.055179,Pseudophilautus\_lunatus:0.103941):0.017938,Pseudophilautus\_sarasinorum:0.12188):0.008333,((Pseudophilautus\_alto:0.089686,Pseudophilautus\_stuarti:0.089686):0.017031,Pseudophilautus\_popularis:0.106717):0.023495):0.023988,Pseudophilautus\_cavirostris:0.154201):0.011903,Pseudophilautus\_bambaradeniyai:0.166103):0.03241,((Pseudophilautus\_mooreorum:0.043738,Pseudophilautus\_poppiae:0.043738):0.075407,Pseudophilautus\_stellatus:0.119145):0.079368):0.036553):0.015802,((Pseudophilautus\_microtympanum:0.058305,Pseudophilautus\_steineri:0.058305):0.065143,Pseudophilautus\_papillosus:0.123448):0.12742):0.07557):0.010244,Mercurana\_myristicapalustris:0.336682):0.027413,Beddomixalus\_bijui:0.364095):0.040705,((((Kurixalus\_baliogaster:0.020296,Kurixalus\_bisacculus:0.020296):0.035805,Kurixalus\_odontotarsus:0.056101):0.059284,(Kurixalus\_naso:0.05482,Kurixalus\_verrucosus:0.05482):0.060564):0.070441,((Kurixalus\_banaensis:0.114474,Kurixalus\_viridescens:0.114474):0.051778,Kurixalus\_motokawai:0.166252):0.019573):0.051377,(((Kurixalus\_berylliniris:0.069776,Kurixalus\_effingeri:0.069776):0.022275,Kurixalus\_wangi:0.09205):0.06831,Kurixalus\_idiootocus:0.160361):0.076842):0.057831,Kurixalus\_appendiculatus:0.295033):0.109766):0.009731,(Nasutixalus\_jerdonii:0.179873,Nasutixalus\_medogensis:0.179873):0.234658):0.017578,((((((((Philautus\_juliandringi:0.087469,Philautus\_umbra:0.087469):0.023355,Philautus\_mjobergi:0.110824):0.032214,(Philautus\_amoenus:0.098163,Philautus\_nephophilus:0.098163):0.044875):0.031373,Philautus\_kakipanjang:0.174411):0.019853,(((Philautus\_acutirostris:0.014316,Philautus\_worcesteri:0.014316):0.099187,Philautus\_surdus:0.113502):0.072107,(Philautus\_petersi:0.139612,Philautus\_refugii:0.139612):0.045998):0.008654):0.021992,(Philautus\_davidlabangi:0.063086,Philautus\_disgregus:0.063086):0.153169):0.018102,(((Philautus\_abditus:0.091823,Philautus\_vermiculatus:0.091823):0.038435,(Philautus\_acutus:0.055953,Philautus\_aurantium:0.055953):0.074305):0.013763,(Philautus\_bunitus:0.021947,Philautus\_kerangae:0.021947):0.122074):0.090337):0.013103,Philautus\_aurifasciatus:0.247461):0.011503,(Philautus\_macroscelis:0.142054,Philautus\_everetti:0.142054):0.11691):0.009721,((Philautus\_hosii:0.103654,Philautus\_ingeri:0.103654):0.1086,Philautus\_tectus:0.212255):0.05643):0.046021,Philautus\_cornutus:0.314705):0.117404):0.021569,((((((((((((Rhacophorus\_dugritei:0.012047,Rhacophorus\_hui:0.012047):0.026007,Rhacophorus\_minimus:0.038055):0.

005323,Rhacophorus\_hongchibaensis:0.043378):0.012292,((Rhacophorus\_hungfuensis:0.019356, Rhacophorus\_wui:0.019356):0.026606,Rhacophorus\_puerensis:0.045962):0.009708):0.021342,Rhacophorus\_schlegelii:0.077012):0.015215,((Rhacophorus\_duboisii:0.0209,Rhacophorus\_omeimontis:0.0209):0.045188,Rhacophorus\_burmanus:0.066088):0.026139):0.011588,(Rhacophorus\_smaragdinus:0.083406,Rhacophorus\_arboreus:0.083406):0.020409):0.016942,((Rhacophorus\_lishuensis:0.021939,Rhacophorus\_zhoukaiyae:0.021939):0.039123,Rhacophorus\_dorsoviridis:0.061062):0.059695):0.010891,Rhacophorus\_moltrechti:0.131648):0.026436,Rhacophorus\_feae:0.158085):0.013122,((Rhacophorus\_nigropunctatus:0.071193,Rhacophorus\_pinglongensis:0.071193):0.03698, Rhacophorus\_chenfui:0.108173):0.063033):0.01857,Rhacophorus\_dennysi:0.189777):0.05424,Rhacophorus\_vampyrus:0.244017):0.044545,(Rhacophorus\_achantharrhena:0.085892,Rhacophorus\_dulitensis:0.085892):0.20267):0.033881,((((Rhacophorus\_belalongensis:0.051207,Rhacophorus\_gauni:0.051207):0.011577,Rhacophorus\_gadingensis:0.062784):0.024186,Rhacophorus\_bimaculatus:0.08697):0.041157,(Rhacophorus\_angulirostris:0.084695,Rhacophorus\_penanorum:0.084695):0.043432):0.14018,(((Rhacophorus\_fasciatus:0.017671,Rhacophorus\_harrissoni:0.017671):0.025379,Rhacophorus\_rufipes:0.04305):0.165251,Rhacophorus\_monticola:0.208301):0.034643,Rhacophorus\_cyanopunctatus:0.242944):0.025363):0.054136):0.030746,(((((((Rhacophorus\_norhayatii:0.060592,Rhacophorus\_reinwardti:0.060592):0.030747,Rhacophorus\_borneensis:0.091339):0.038516,Rhacophorus\_bipunctatus:0.129854):0.020592,(Rhacophorus\_kio:0.078887,Rhacophorus\_helena:0.078887):0.071559):0.014421,Rhacophorus\_rhodopus:0.164866999091148):0.084251,((Rhacophorus\_malabaricus:0.103441,Rhacophorus\_pseudomalabaricus:0.103441):0.071118,Rhacophorus\_pardalis:0.174559):0.043236,(Rhacophorus\_annamensis:0.10372,Rhacophorus\_exechopygus:0.10372):0.114075):0.031324):0.022998,((Rhacophorus\_bengkuluensis:0.120572,Rhacophorus\_catamitus:0.120572):0.084479,(Rhacophorus\_indonesiensis:0.165388,Rhacophorus\_robertingeri:0.165388):0.039663):0.034265,Rhacophorus\_poecilnotus:0.239316):0.0328):0.015419,((((Rhacophorus\_orlovi:0.092067,Rhacophorus\_tuberculatus:0.092067):0.102882,Rhacophorus\_calcanus:0.194949):0.019419,(Rhacophorus\_baluensis:0.163841,Rhacophorus\_nigropalmatus:0.163841):0.050528):0.019066,Rhacophorus\_translineatus:0.233435):0.016366,Rhacophorus\_lateralis:0.249801):0.037735):0.065652):0.057508,((((((((Polypedates\_leucomystax:0.028919,Polypedates\_teraiensis:0.028919):0.021283,Polypedates\_megacephalus:0.050201):0.011762,Polypedates\_impresus:0.061964):0.060358,(Polypedates\_braueri:0.063324,Polypedates\_mutus:0.063324):0.036733,Polypedates\_macrodis:0.100056):0.022266):0.024021,(Polypedates\_cruciger:0.091527,Polypedates\_maculatus:0.091527):0.054816):0.014417,Polypedates\_discantus:0.16076):0.017091,Polypedates\_pseudocruciger:0.177851):0.023157,Polypedates\_colletti:0.201008):0.069579,Polypedates\_otlophus:0.270587):0.02932,((Taruga\_fastigo:0.05932,Taruga\_longinasus:0.05932):0.022993,Taruga\_eques:0.082313):0.217594):0.069435,((Ghatixalus\_asterops:0.139811,Ghatixalus\_variabilis:0.139811):0.041462,Ghatixalus\_magnus:0.181274):0.188069):0.023127,((Feihyla\_hansena:0.143975,Feihyla\_vittata:0.143975):0.157705,Feihyla\_palpebralis:0.30168):0.034161,Feihyla\_kajau:0.335841):0.056629):0.018227):0.011945,((Chiromantis\_petersii:0.08395,Chiromantis\_xerampelina:0.08395):0.094454,Chiromantis\_rufescens:0.178403):0.091318,(Chiromantis\_doriae:0.121793,Chiromantis\_nongkhorensis:0.121793):0.147928):0.152921):0.011585,Gracixalus\_medogensis:0.434226):0.019451):0.01693,((((Gracixalus\_quangi:0.053458,Gracixalus\_supercornutus:0.053458):0.043391,Gracixalus\_gracilipes:0.096849):0.032292,Gracixalus\_seesom:0.129141):0.048054,Gracixalus\_quyeti:0.177194):0.078506,Gracixalus\_lumarius:0.2557):0.046469,((Gracixalus\_nonggangensis:0.052751,Gracixalus\_waza:0.052751):0.063093,Gracixalus\_sapaensis:0.115844):0.014359,(

Gracixalus\_jinxiuensis:0.109225,Gracixalus\_jinggangensis:0.109225):0.020978):0.171966):0.168439):0.009446,((((((((Theلودerma\_baibungense:0.0916459981703758,Theلودerma\_pyaukkya:0.091646):0.028175,Theلودerma\_asperum:0.119821):0.029204,Theلودerma\_licin:0.149025):0.009238,Theلودerma\_petilum:0.158264):0.030163,Theلودerma\_albopunctatum:0.188427):0.051885,(Theلودerma\_phrynoderma:0.129856,Theلودerma\_ryabovi:0.129856):0.028084,Theلودerma\_moloch:0.15794):0.082371):0.042025,Theلودerma\_leporosum:0.282337):0.026304,((((((((Theلودerma\_laeve:0.121659,Theلودerma\_truongsonense:0.121659):0.029374,Theلودerma\_nebulosum:0.151033):0.036269,Theلودerma\_anna:0.187302):0.057331,(Theلودerma\_bicolor:0.151719,Theلودerma\_corticale:0.151719):0.053409,Theلودerma\_gordoni:0.205128):0.039505):0.016924,Theلودerma\_rhododiscus:0.261557):0.013489,Theلودerma\_palliatum:0.275046):0.014293,(Theلودerma\_lateriticum:0.145131,Theلودerma\_lacustrinum:0.145131):0.144208):0.019302):0.022418,(Theلودerma\_horridum:0.08133,Theلودerma\_stellatum:0.08133):0.055693,Theلودerma\_vietnamense:0.137023):0.194036):0.031181,(Nyxixalus\_pictus:0.204058,Nyxixalus\_spinosus:0.204058):0.046637,Nyxixalus\_margaritifer:0.250696):0.111544):0.117813):0.019894,((((Liuixalus\_calcarius:0.022565,Liuixalus\_ocellatus:0.022565):0.011682,Liuixalus\_romeri:0.034247):0.009876,Liuixalus\_shiwandashan:0.044123):0.014417,Liuixalus\_feii:0.05854):0.012924,Liuixalus\_hainanus:0.071464):0.428483):0.044736,(((Buergeria\_oxyccephala:0.178761,Buergeria\_robusta:0.178761):0.054573,Buergeria\_buergeri:0.233333):0.097542,Buergeria\_japonica:0.330875):0.213808);

### Scincidae

((Typhlosaurus\_lomia:0.203951,Acontias\_meleagris:0.203951):0.508416,((((Eumeces\_schneideri:0.233269,Scincus\_mitranus:0.233269):0.238766,(Ophiomorus\_punctatissimus:0.418765,Eurylepis\_taniolata:0.418765):0.053269):0.036706,(Chalcides\_ocellatus:0.118784,(Chalcides\_sexlineatus:0.071672,Chalcides\_viridanus:0.071672):0.047112):0.286159,(Feylinia\_polylepis:0.307215,Scelotes\_mirus:0.307215):0.07393,(Madascincus\_melanopleura:0.315113,Amphiglossus\_reticulatus:0.315113):0.066031):0.023799):0.103797):0.038083,((Brachymeles\_miriamae:0.285945,(Brachymeles\_bonitae:0.16073,(Brachymeles\_talinis:0.109124,(Brachymeles\_gracilis:0.077319,Brachymeles\_bicolor:0.077319):0.031805):0.051607):0.125214):0.233641,(Plestiodon\_chinensis:0.266953,((Plestiodon\_fasciatus:0.051654,Plestiodon\_kishinouyei:0.051654):0.139112,(Plestiodon\_laticeps:0.142318,(Plestiodon\_egregius:0.113775,Plestiodon\_skiltonianus:0.113775):0.028543):0.048449):0.045382,(Plestiodon\_quadri-lineatus:0.202906,(Plestiodon\_stimpsonii:0.097382,(Plestiodon\_elegans:0.08119,(Plestiodon\_marginatus:0.051842,Plestiodon\_tamdaoensis:0.051842):0.029348):0.016192):0.043739,(Plestiodon\_barbouri:0.125793,(Plestiodon\_latiscutatus:0.107976,(Plestiodon\_japonicus:0.025624,(Plestiodon\_capito:0.007416,Plestiodon\_tunganus:0.007416):0.018208):0.082352):0.017817):0.015329):0.061785):0.033242):0.030805):0.252632):0.027238):0.066988,((Ristella\_rurkii:0.54598,(Tribolonotus\_novaeguineae:0.524623,((Mesoscincus\_schwartzei:0.419002,(Lamprolepis\_smaragdina:0.341903,((Lygosoma\_koratense:0.1939,Lygosoma\_quadupes:0.1939):0.109336,(Lygosoma\_albopunctatum:0.253215,(Lygosoma\_punctata:0.227771,(Lygosoma\_bowringii:0.190314,Lygosoma\_lineolatum:0.190314):0.037457):0.025443):0.050021):0.038667):0.077099):0.056996,((Emoia\_caeruleocauda:0.249456,(Emoia\_cyanura:0.187752,Emoia\_atrocostata:0.187752):0.061704):0.110098,((Leptosiphos\_vigintiserierum:0.290563,(Carlia\_fusca:0.164809,Lygisaurus\_novaeguineae:0.164809):0.125754):0.032192,(Eugongylus\_rufescens:0.294058,(Nannoscincus\_mariei:0.230909,(Oligosoma\_lichenigera:0.160789,Oligosoma\_aeneum:0.160789):0.07012):0.06315):0.028696):0.0368):0.116443):0.020624,((Tiliqua\_scincoides:0.30919,Egernia\_stokesi

i:0.30919):0.157675,(((Trachylepis\_perrotetii:0.285623,Mabuya\_mabouya:0.285623):0.04425,(Heremites\_vittatus:0.197695,Heremites\_auratus:0.197695):0.132178):0.030352,(Eutropis\_dissimilis:0.304851,(Dasia\_olivacea:0.232587,(Dasia\_grisea:0.177753,Dasia\_vittata:0.177753):0.054834):0.072265):0.055373):0.040968,(Eutropis\_longicaudata:0.362188,((Eutropis\_multifasciata:0.266171,(Eutropis\_macrophthalma:0.149736,Eutropis\_rudis:0.149736):0.116436):0.068925,(Eutropis\_tytleri:0.325061,((Eutropis\_macularia:0.036768,Eutropis\_rugifera:0.036768):0.268144,((Eutropis\_multicarinata:0.129777,(Eutropis\_cumingi:0.088597,Eutropis\_indepressa:0.088597):0.04118):0.140281,((Eutropis\_carinata:0.198088,(Eutropis\_beddomei:0.080887,(Eutropis\_nagarjunensis:0.042418,Eutropis\_trivittata:0.042418):0.038469):0.117201):0.056924,((Eutropis\_bibronii:0.178977,Eutropis\_quadricarinata:0.178977):0.058597,(Eutropis\_madaraszi:0.185763,(Eutropis\_allapallensis:0.104907,Eutropis\_clivicola:0.104907):0.080856):0.051811):0.017438):0.015046):0.034854):0.020149):0.010034):0.027092):0.039005):0.065672):0.029756):0.028001):0.021358):0.032038,(Sphenomorphus\_praesignis:0.527611,(((Asymblepharus\_nyingchiensis:0.245778,Asymblepharus\_medogensis:0.245778):0.157691,(Ablepharus\_pannonicus:0.305691,(Asymblepharus\_alaicus:0.246246,Asymblepharus\_sp:0.246246):0.059445):0.097778):0.110728,(((Tropidophorus\_baconi:0.206808,Tropidophorus\_grayi:0.206808):0.122512,(Tropidophorus\_cocincinensis:0.242411,Tropidophorus\_microlepis:0.242411):0.086909):0.049632,(Tropidophorus\_brookei:0.20076,(Tropidophorus\_beccarii:0.153797,(Tropidophorus\_misaminus:0.074171,Tropidophorus\_partelloi:0.074171):0.079626):0.046962):0.178192):0.107143,((Isopachys\_anguinoides:0.405989,(Tythoscincus\_aesculeti cola:0.378345,(Sphenomorphus\_stellatus:0.268706,((Tythoscincus\_atrigularis:0.182867,Tythoscincus\_hallieri:0.182867):0.044777,(Tythoscincus\_parvus:0.14421,Sphenomorphus\_buenloicus:0.14421):0.083434):0.041062):0.109638):0.027645):0.053339,((Larutia\_seribuatensis:0.432162,(((Sphenomorphus\_indicus:0.322728,Sphenomorphus\_maculatus:0.322728004582405):0.049744,(Sphenomorphus\_simus:0.3368,((Sphenomorphus\_cyanolaemus:0.077137,Sphenomorphus\_sabanus:0.077137):0.185154,(Sphenomorphus\_multisquamatus:0.185532,Sphenomorphus\_variegatus:0.185532):0.076759):0.074509):0.035672):0.051513,((Scincella\_reevesii:0.376797,((Insulasaurus\_arborens:0.233323,(Insulasaurus\_wrighti:0.179217,Insulasaurus\_victoria:0.179217):0.054106):0.106205,(Lipinia\_pulchella:0.29429,(Lipinia\_noctua:0.227152,Papuascincus\_stanleyanus:0.227152):0.067138):0.045238):0.037269):0.022002,(Scincella\_doriae:0.385144,(Lipinia\_vittigera:0.364168,(Scincella\_rupicola:0.351437,((Scincella\_vandenburghi:0.258603,(Scincella\_huanrenensis:0.092033,Scincella\_tsinlingensis:0.092033):0.166569):0.065368,(Scincella\_lateralis:0.279777,(Scincella\_assata:0.198374,(Scincella\_cherriei:0.092925,Scincella\_potanini:0.0929250024995804):0.105449):0.081403):0.044194):0.027466):0.012731):0.020976):0.013655):0.025186):0.008177):0.012345,((Sphenomorphus\_concinnatus:0.34042,(Sphenomorphus\_melanopogon:0.298693,((Sphenomorphus\_jobiensis:0.187414,Sphenomorphus\_muelleri:0.187414):0.087727,((Sphenomorphus\_solomonis:0.06082,Sphenomorphus\_scutatus:0.06082):0.174739,(Sphenomorphus\_fasciatus:0.097528,(Sphenomorphus\_leptofasciatus:0.068629,(Sphenomorphus\_cranei:0.029803,Sphenomorphus\_mairdroni:0.029803):0.038826):0.028899):0.138031):0.039582):0.023552):0.041727):0.060049,(((Lerista\_neander:0.258977,Ctenotus\_labillardieri:0.258977):0.067384,((Anomalopus\_swansoni:0.255416,Calyptotis\_scutirostrum:0.255416):0.058513,(Hemiergis\_peronii:0.279576,(Eulamprus\_kosciuskoi:0.139008,Eulamprus\_quoyii:0.139008):0.140568):0.034353):0.012431):0.056993,(Otosaurus\_cumingi:0.358792,((Sphenomorphus\_diwata:0.255039,(Sphenomorphus\_acutus:0.241044,(Parvoscincus\_steerei:0.159998,Parvoscincus\_tagapayo:0.159998):0.081046):0.013996):0.042291,((Tropidophorus\_berdmorei:0.188915,(Tropidophorus\_laticutatus:0.091164,Tropidophorus\_matsuii:

0.091164):0.097752):0.051102,((Tropidophorus\_murphyi:0.107893,(Tropidophorus\_baviensis:0.064144,Tropidophorus\_hainanus:0.064144):0.043749):0.101941,(Tropidophorus\_sinicus:0.185532,(Tropidophorus\_robinsoni:0.123048,Tropidophorus\_thai:0.123048):0.062483):0.024302):0.030184):0.057313):0.061462):0.024561):0.017115):0.044039):0.014821):0.026766):0.028104):0.013413):0.050408):0.035794):0.098555);

## Viperidae

((((((((((((((Protobothrops\_elegans:0.067677,Protobothrops\_mucrosquamatus:0.067677):0.014036,(Protobothrops\_maolanensis:0.050089,Protobothrops\_trungkhanhensis:0.050089):0.031623):0.054702,(Protobothrops\_flavoviridis:0.036487,Protobothrops\_tokarensis:0.036487):0.099928):0.007474,(((Protobothrops\_jerdonii:0.037299,Protobothrops\_xiangchengensis:0.037299):0.05249,Protobothrops\_dabieshanensis:0.089789):0.028843,Protobothrops\_cornutus:0.118632):0.025257):0.042039,Protobothrops\_mangshanensis:0.185928):0.026276,((Protobothrops\_himalayanus:0.079082,Protobothrops\_kaulbacki:0.079082):0.074663,Protobothrops\_sieversorum:0.153745):0.058459):0.036404,(((Ovophis\_convictus:0.129411,Ovophis\_monticola:0.129411):0.043336,Ovophis\_zayuensis:0.172747):0.010407,(Ovophis\_makazayazaya:0.137348,Ovophis\_tonkinensis:0.137348):0.045806):0.065454):0.030122,((((Gloydius\_monticola:0.067493,Gloydius\_huangi:0.067493):0.01537,Gloydius\_rubromaculatus:0.082863):0.016442,(Gloydius\_angusticeps:0.078024,Gloydius\_strauchii:0.078024):0.021281):0.012634,(Gloydius\_liupanensis:0.092725,Gloydius\_qinlinensis:0.092725):0.019214):0.024424,((Gloydius\_blohmhoffi:0.045877,Gloydius\_tsushimaensis:0.045877):0.053494,(Gloydius\_brevicaudus:0.018939,Gloydius\_ussuriensis:0.018939):0.080432):0.036992):0.008804,((((Gloydius\_intermedius:0.016254,Gloydius\_shedaoensis:0.016254):0.018075,Gloydius\_halys:0.034328):0.004653,Gloydius\_stejnegeri:0.038982):0.007399,Gloydius\_cognatus:0.046381):0.098785996981144):0.133563):0.021975,((((((((Bothrops\_asper:0.088421,Bothrops\_brazili:0.088421):0.035317,(Bothrops\_erythromelas:0.091421,Bothrops\_jararaca:0.091421):0.032318):0.011829,Bothrops\_chloromelas:0.135568):0.022821,Bothrops\_ammodytoides:0.158388):0.018907,Bothrops\_pictus:0.177296):0.060457,(Atropoides\_picadoi:0.143439,Cerrophidion\_tzotzilorum:0.143439):0.04255,(Porthidium\_ophryomegas:0.124876,Porthidium\_yucatanicum:0.124876):0.061113):0.051763):0.013191,(((Mixcoatlus\_browni:0.111687,Mixcoatlus\_melanurus:0.111687):0.015369,Mixcoatlus\_barbouri:0.127056):0.051709,Ophryacus\_undulatus:0.178765):0.072178):0.014011,((Bothriechis\_lateralis:0.136536,Bothriechis\_nigroviridis:0.136536):0.081809,Bothriechis\_schlegelii:0.218346):0.046609):0.011645,((((Crotalus\_basiliscus:0.110042,Crotalus\_pricei:0.110042):0.023255,(Crotalus\_eno:0.101112,Crotalus\_willardi:0.101112):0.032185):0.01599,(Crotalus\_adamanteus:0.114667,Crotalus\_ruber:0.114667):0.03462):0.022214,Crotalus\_cerastes:0.1715):0.026574,(Sistrurus\_catenatus:0.146901,Sistrurus\_miliarius:0.146901):0.051174):0.060429,(Agkistrodon\_contortrix:0.144917,Agkistrodon\_piscivorus:0.144917):0.113587):0.018096):0.007024,Lachesis\_acrochorda:0.283624):0.01708):0.006967,(Ovophis\_okinavensis:0.140521,Trimeresurus\_gracilis:0.140521):0.16715):0.014563,((((((((Trimeresurus\_erythrurus:0.017731,Trimeresurus\_purpureomaculatus:0.017731):0.010122,Trimeresurus\_cantori:0.027852):0.009196,Trimeresurus\_andersonii:0.037049):0.029261,Trimeresurus\_albolabris:0.06631):0.015621,Trimeresurus\_septentrionalis:0.08193):0.015616,(Trimeresurus\_fasciatus:0.048057,Trimeresurus\_insularis:0.048057):0.049489):0.068704,((Trimeresurus\_macrops:0.050043,Trimeresurus\_venustus:0.050043):0.025566,Trimeresurus\_kanburiensis:0.075609):0.090641):0.018822,((((Trimeresurus\_gumprechtii:0.053008,Trimeresurus\_stejnegeri:0.053008):0.029021,Trimeresurus\_truongsonensis:0.082029):0.011609,Trimeresurus\_

surus\_vogeli:0.093639):0.023666,Trimeresurus\_yunnanensis:0.117304):0.009162,Trimeresurus\_medoensis:0.126466):0.058606):0.00961,Trimeresurus\_sichuanensis:0.194682):0.015301,(((Trimeresurus\_flavomaculatus:0.02389,Trimeresurus\_mcgregori:0.02389):0.083327,(Trimeresurus\_schultzei:0.08427,Trimeresurus\_sumatranus:0.08427):0.022947):0.01919,Trimeresurus\_malcolmi:0.126406):0.039775,Trimeresurus\_hageni:0.166181):0.043802):0.016792,((Trimeresurus\_popeiorum:0.074359,Trimeresurus\_sabahi:0.074359):0.110693,Trimeresurus\_tibetanus:0.185051):0.041724):0.055712,(((Trimeresurus\_borneensis:0.126783,Trimeresurus\_wiroti:0.126783):0.058094,Trimeresurus\_puniceus:0.184877):0.051404,((Trimeresurus\_gramineus:0.09954,Trimeresurus\_trigonocephalus:0.09954):0.057734,Trimeresurus\_malabaricus:0.157274):0.079007):0.046206):0.039747):0.047264,(((Hypnale\_hypnale:0.124461,Hypnale\_zara:0.124461):0.051554,Hypnale\_nepa:0.176016):0.086055,Calloselasma\_rhodostoma:0.26207):0.090027,(((Tropidolaemus\_subannulatus:0.181675,Tropidolaemus\_wagleri:0.181675):0.116911,Deinagkistrodon\_acutus:0.298586):0.026586,Garrhthius\_chaseni:0.325172):0.026925):0.017401):0.044439,Azemiops\_feae:0.413937):0.076838,((((((((((((Vipera\_dinniki:0.004376,Vipera\_renardi:0.004376):0.010058,Vipera\_lotievi:0.014433):0.014156,Vipera\_eriwanensis:0.02859):0.019292,Vipera\_ursinii:0.047882):0.009325,Vipera\_orlovi:0.057206):0.021506,(Vipera\_anatolica:0.061283,Vipera\_kaznakovi:0.061283):0.01743):0.023703,(((Vipera\_berus:0.017635,Vipera\_barani:0.017635):0.0151,Vipera\_nikolskii:0.032736):0.032401,Vipera\_seoanei:0.065137):0.037279):0.05538,(Vipera\_aspis:0.085084,Vipera\_latastei:0.085084):0.072711):0.034899,(Vipera\_ammodytes:0.077665,Vipera\_transcaucasiana:0.077665):0.115029):0.081541,((Daboia\_mauritanica:0.153101001127243,Daboia\_palaestinae:0.153101):0.055699,Daboia\_siamensis:0.2088):0.065435):0.028376,((((Montivipera\_albizona:0.031112,Montivipera\_wagneri:0.031112):0.009687,Montivipera\_bornmuelleri:0.040798):0.023297,Montivipera\_xanthina:0.064095):0.03855,(Montivipera\_latifii:0.02616,Montivipera\_raddei:0.02616):0.076485):0.067347,(Macrovipera\_lebetina:0.035178,Macrovipera\_schweizeri:0.035178):0.134815):0.132619):0.036368,(((Pseudocerastes\_persicus:0.10702,Pseudocerastes\_urarachnoides:0.10702):0.058245,Pseudocerastes\_fieldi:0.165265):0.075247,Eristicophis\_macmahoni:0.240512):0.098467):0.065213,((((Echis\_leucogaster:0.033682,Echis\_pyramidum:0.033682):0.062176,Echis\_borkini:0.095858):0.024117,Echis\_khosatzkii:0.119975):0.099633,(Echis\_coloratus:0.103214,Echis\_omanensis:0.103214):0.116393):0.027481,(Echis\_jogeri:0.096743,Echis\_ocellatus:0.096743):0.150345):0.016766,Echis\_carinatus:0.263854):0.120908,(((Causus\_resimus:0.142287,Causus\_rhombeatus:0.142287):0.019133,Causus\_defilippii:0.16142):0.05938,Causus\_lichtensteini:0.220801):0.124122,((Cerastes\_cerastes:0.13493,Cerastes\_gasperettii:0.13493):0.078572,Cerastes\_vipera:0.213501):0.131421):0.039839):0.019431):0.012482,((((((((Bitis\_cornuta:0.069743,Bitis\_rubida:0.069743):0.049242,Bitis\_atropos:0.118985):0.050894,Bitis\_xeropaga:0.16988):0.061481,(Bitis\_caudalis:0.08039,Bitis\_peringueyi:0.08039):0.150971):0.043845,((Bitis\_gabonica:0.032677,Bitis\_rhinoceros:0.032677):0.090733,Bitis\_nasicornis:0.12341):0.151796):0.021336,Bitis\_worthingtoni:0.296541):0.03016,Bitis\_arietans:0.326701):0.060597,(((Atheris\_nitschei:0.122891,Atheris\_desaixi:0.122891):0.03023,(Atheris\_squamigera:0.060738,Atheris\_hispida:0.060738):0.092383):0.022425,((Atheris\_ceratophora:0.03995,Atheris\_matildae:0.03995):0.091442,Atheris\_barbouri:0.131392):0.044154):0.030024,Atheris\_chlorechis:0.20557):0.181728):0.029377):0.012456,Proatheris\_superciliaris:0.42913):0.061644);



**Data S2.**

Densities for calibrated nodes from **Table S5**. “Prior” means the marginal prior, and “Posterior” means the marginal posterior. For the majority of calibrated nodes, the incomplete overlap of prior and posterior distributions suggested the data contain sufficient information to overrule the priors for these parameters.

# Agamidae

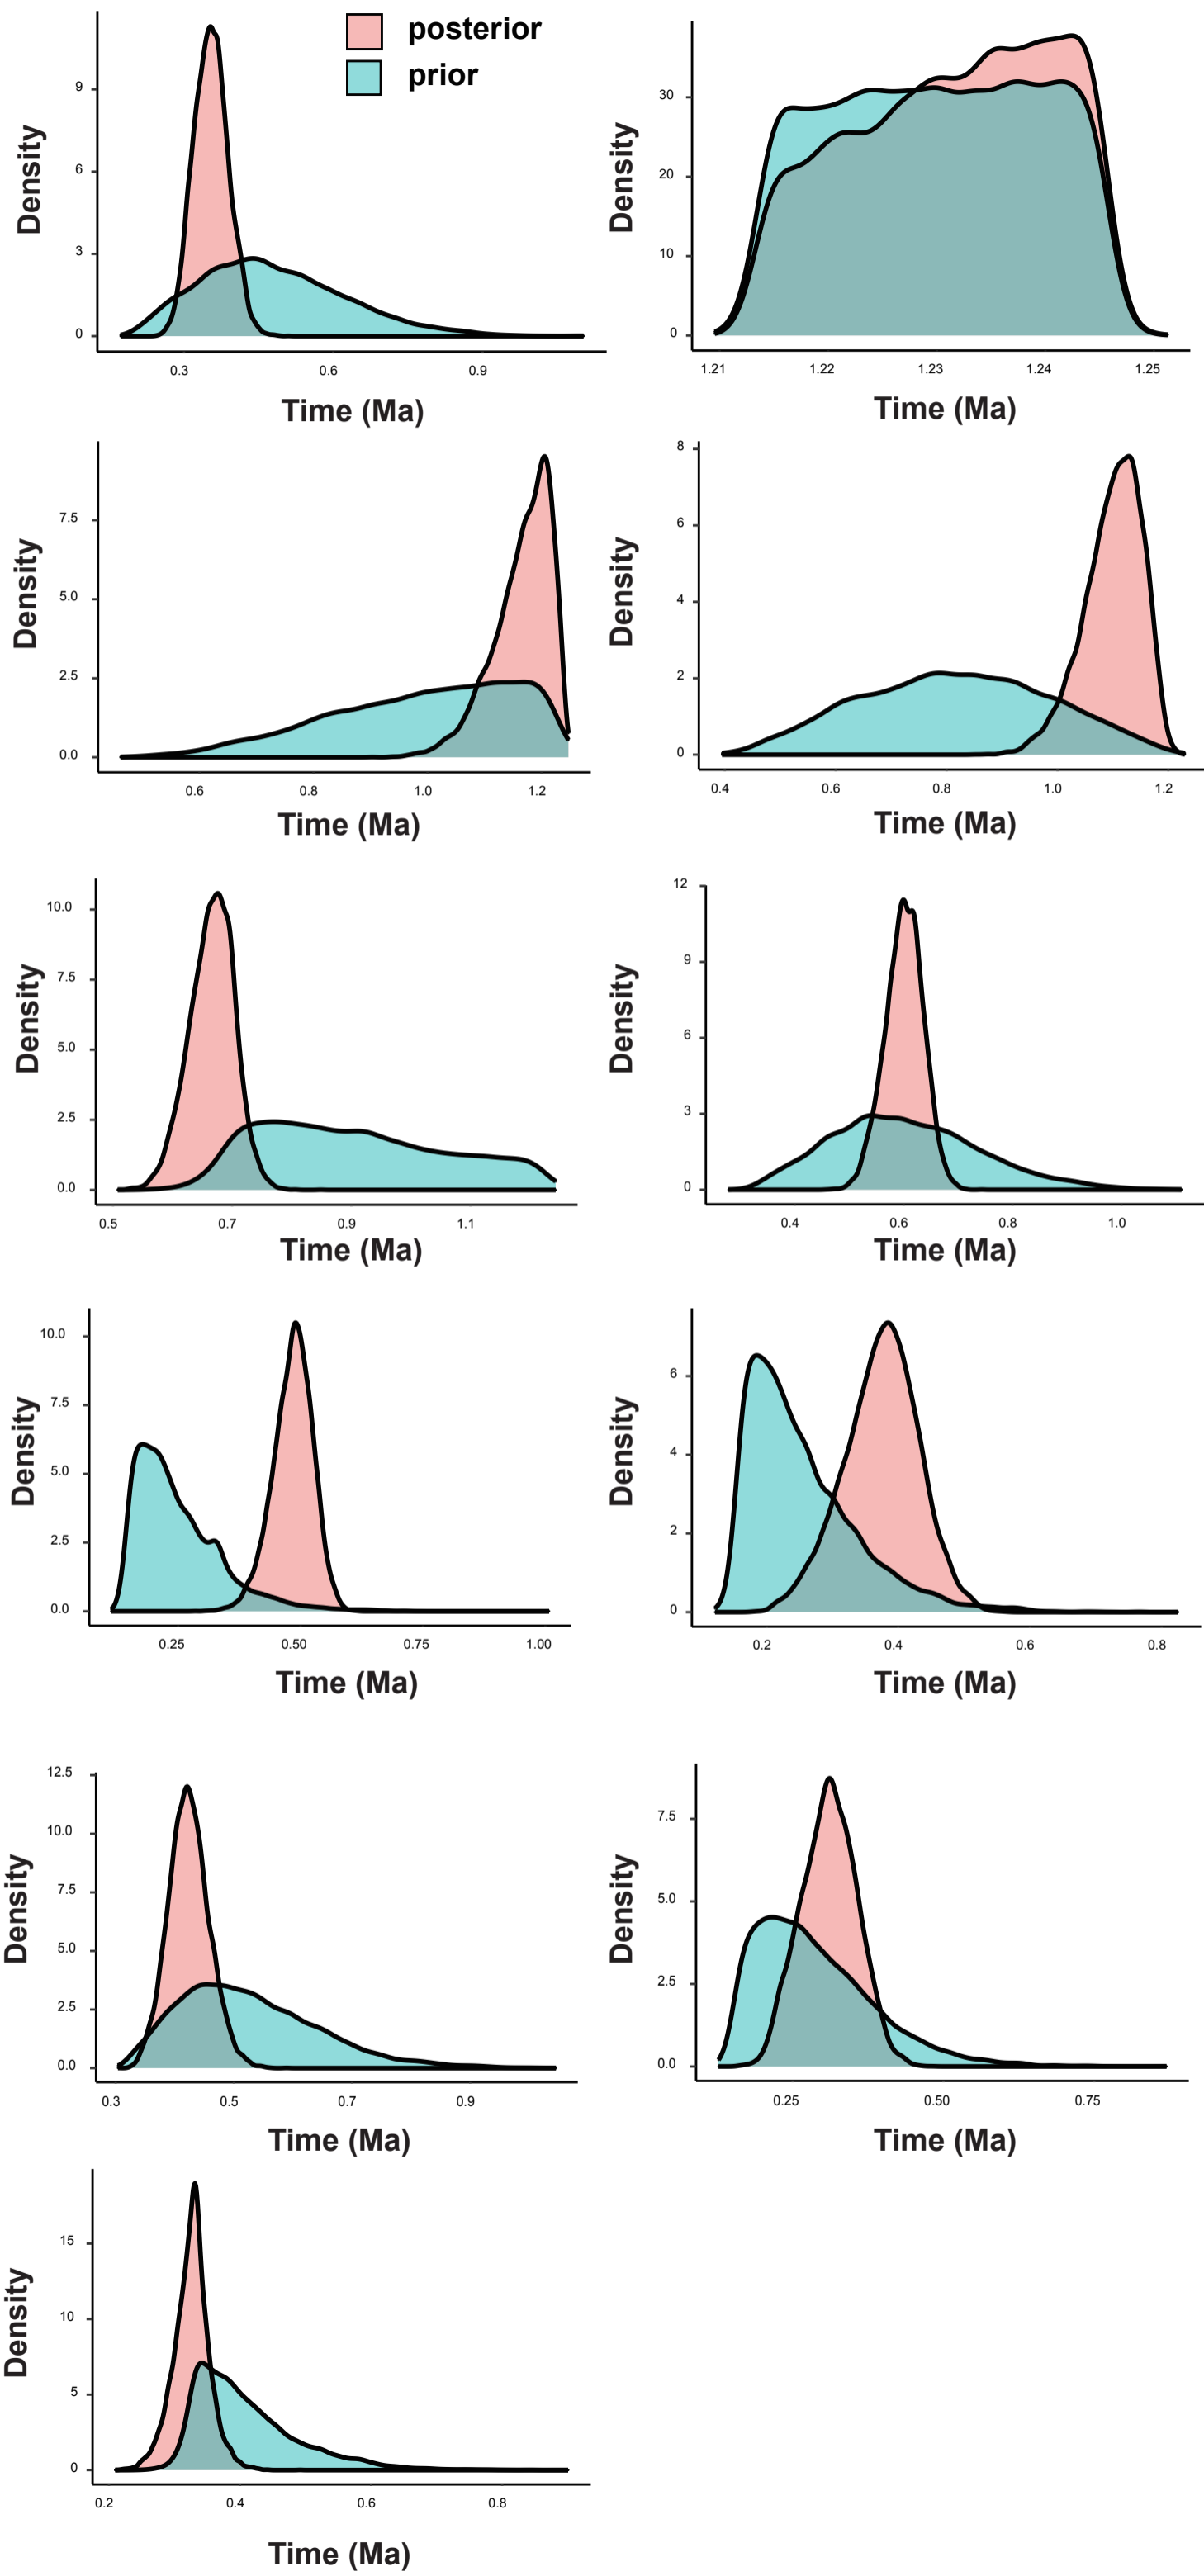

# Anguidae

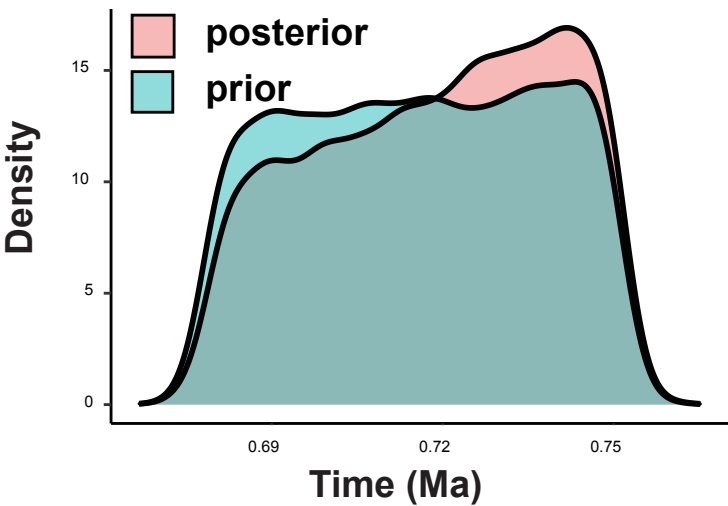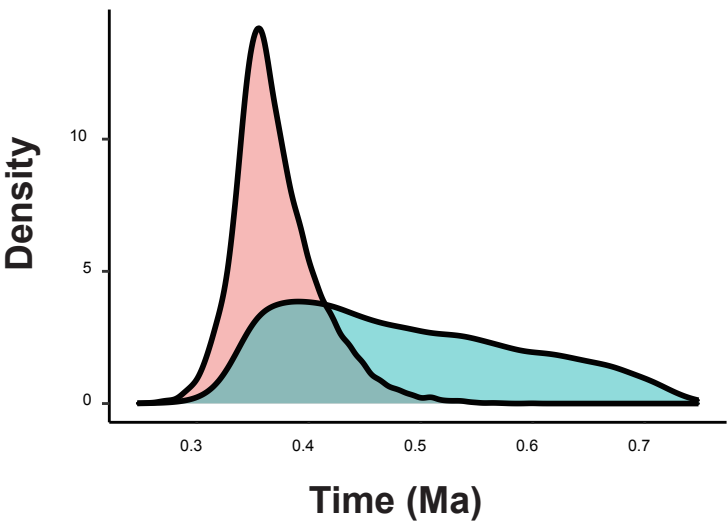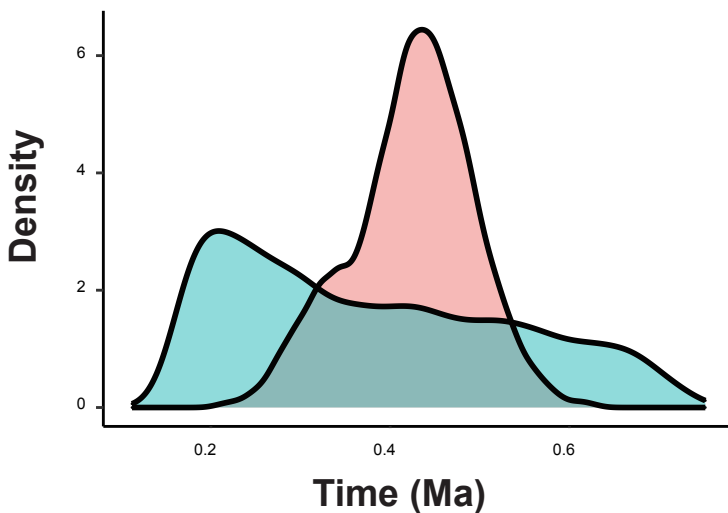

# Bufo

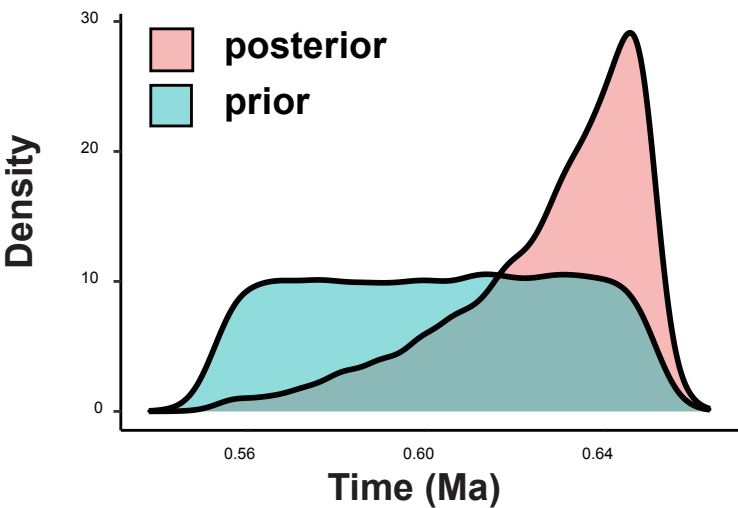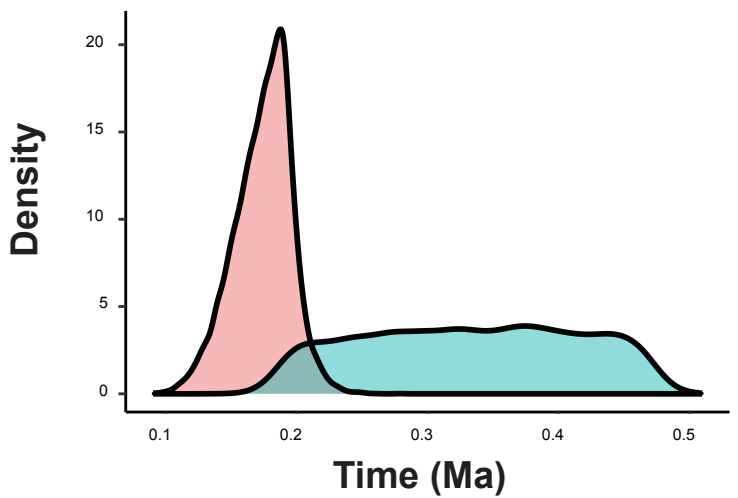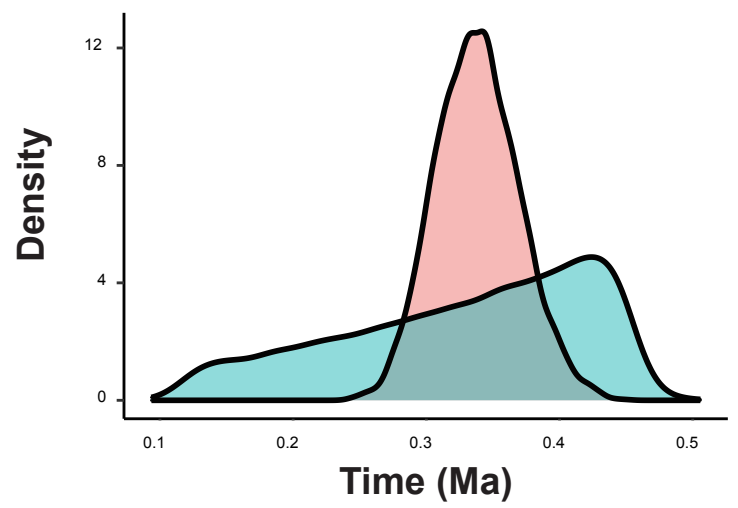

# Colubridae

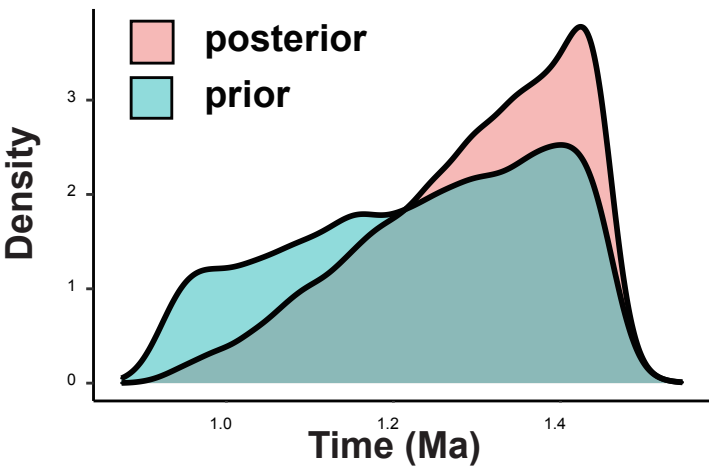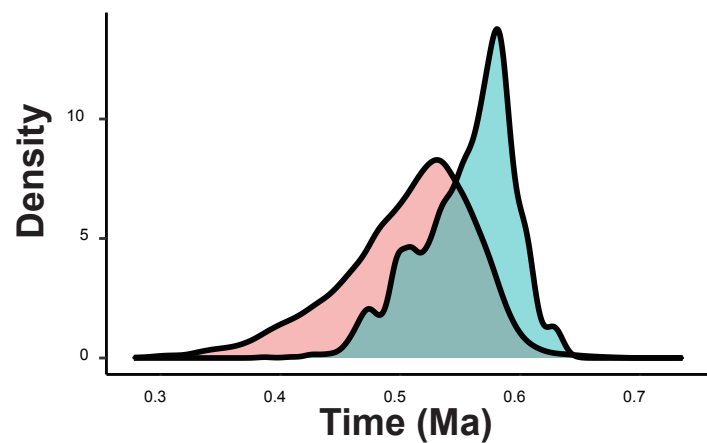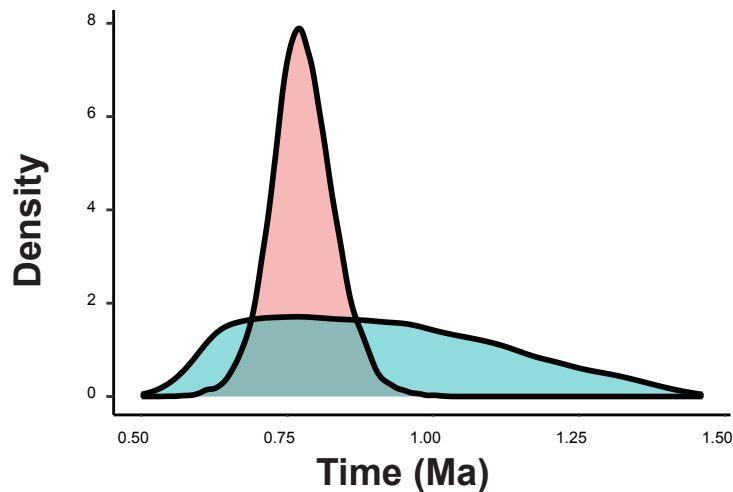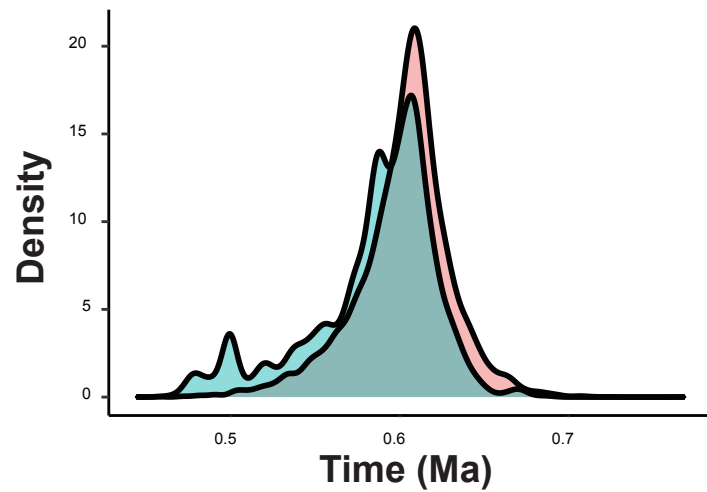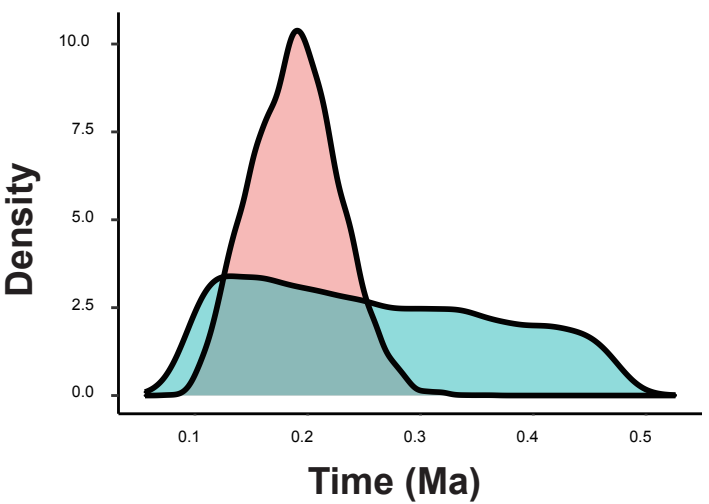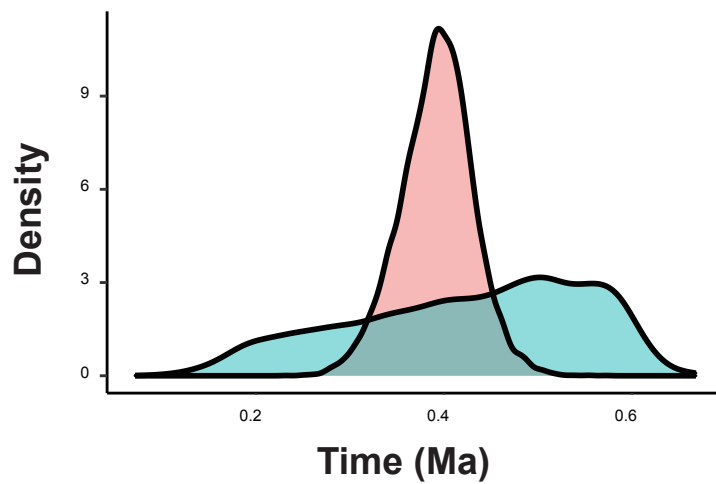

# Dicroglossidae

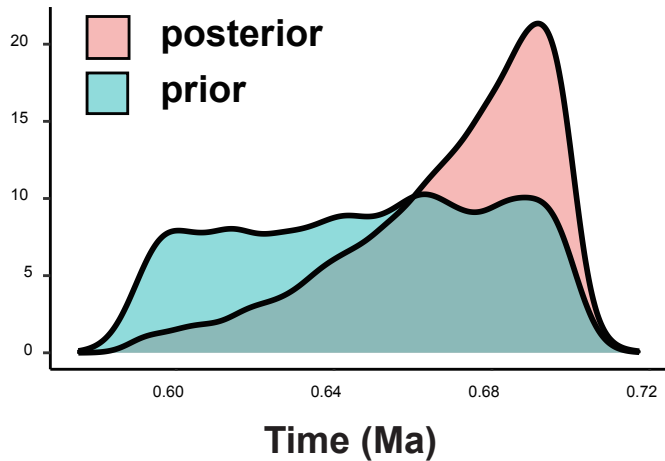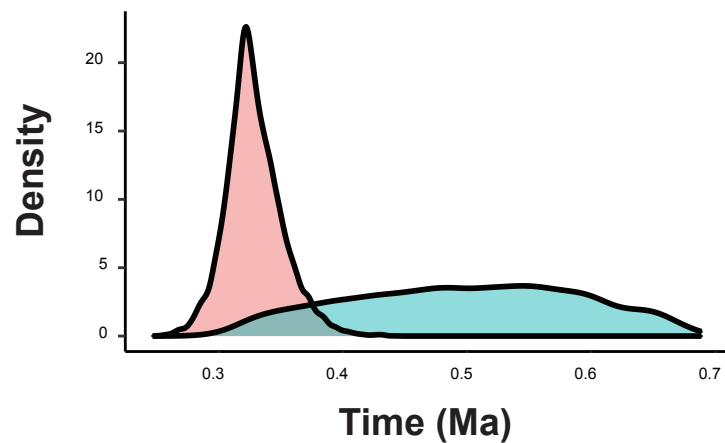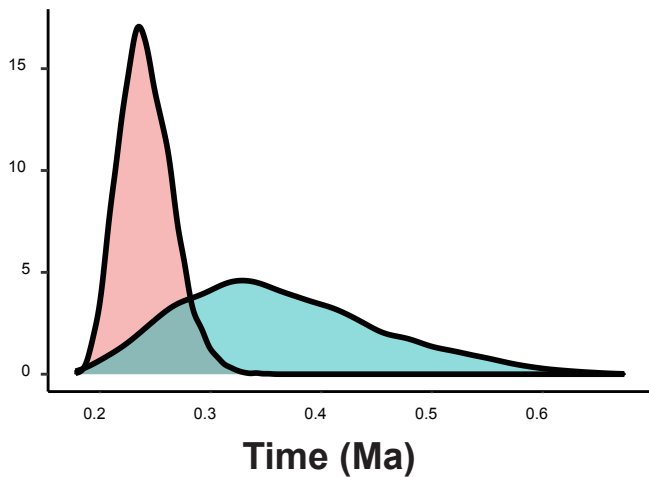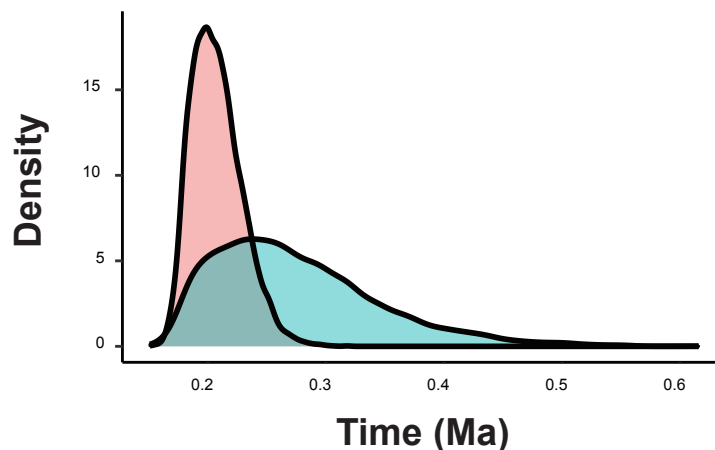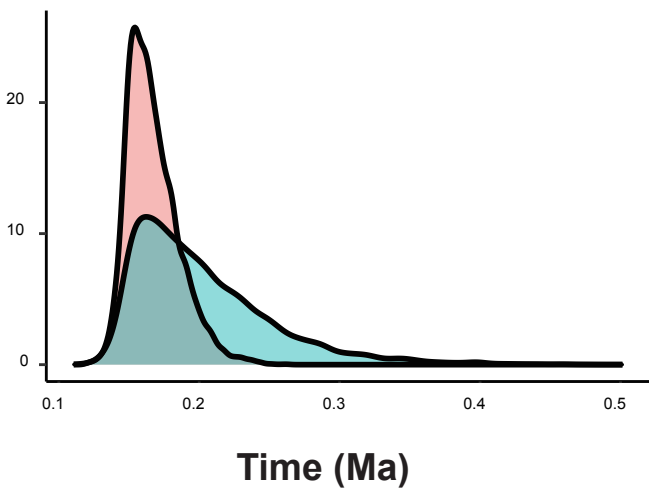

# Elapidae

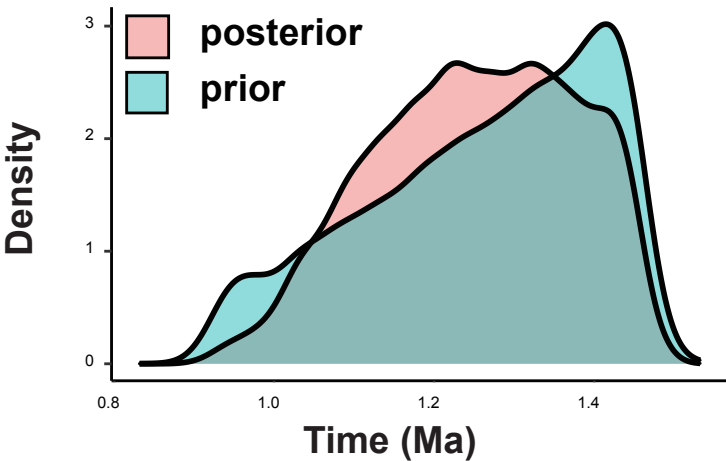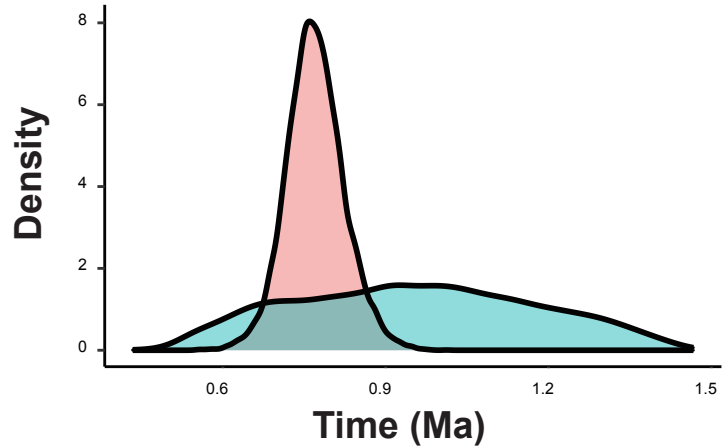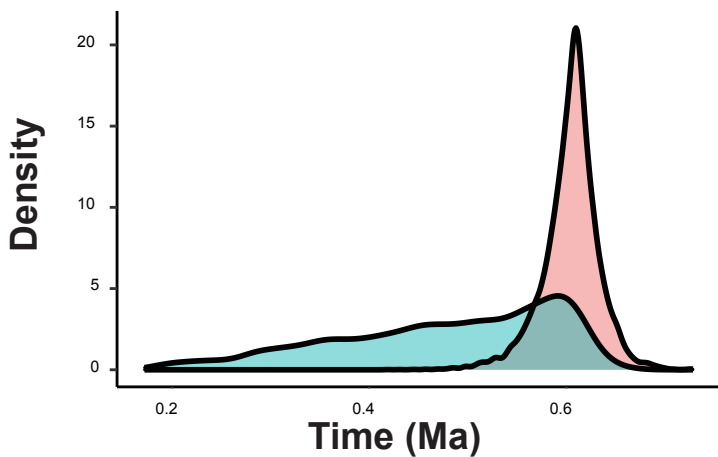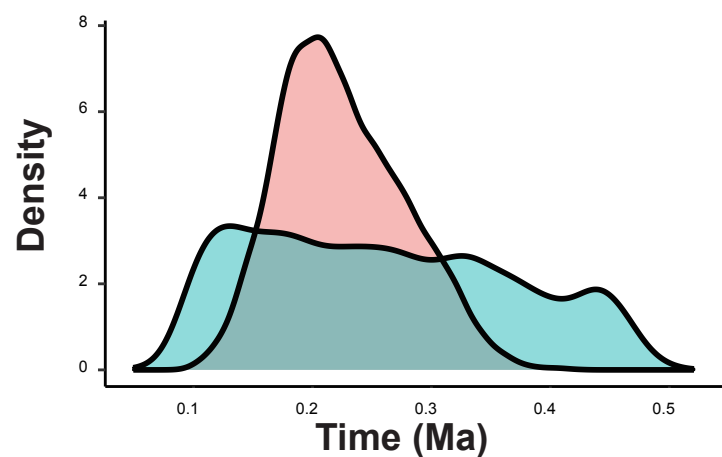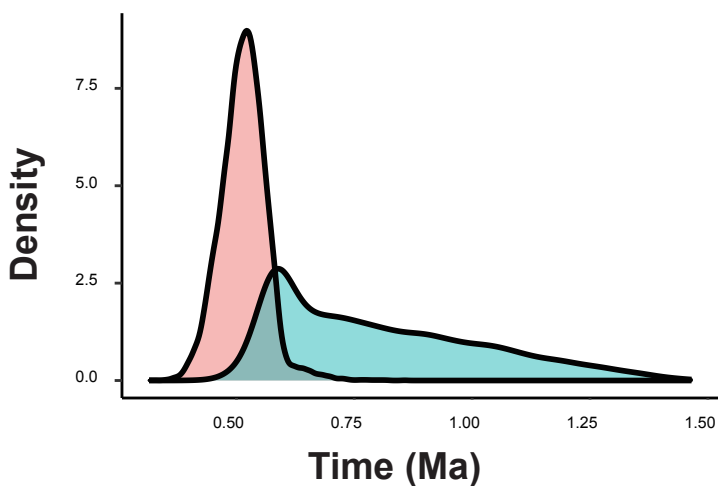

# Gekkonidae

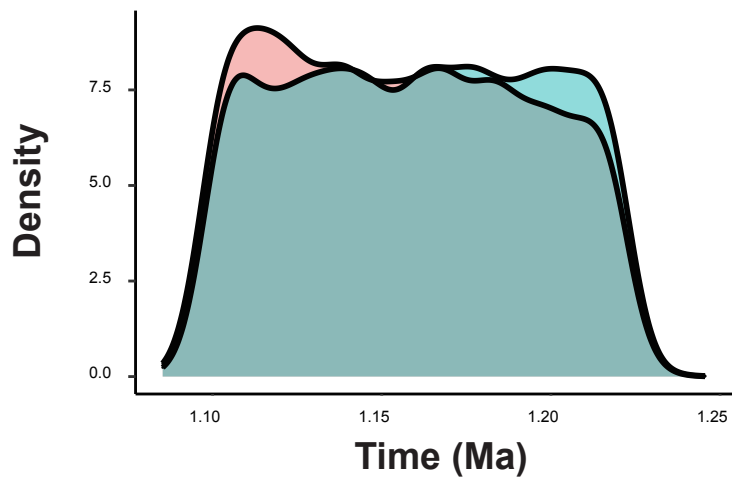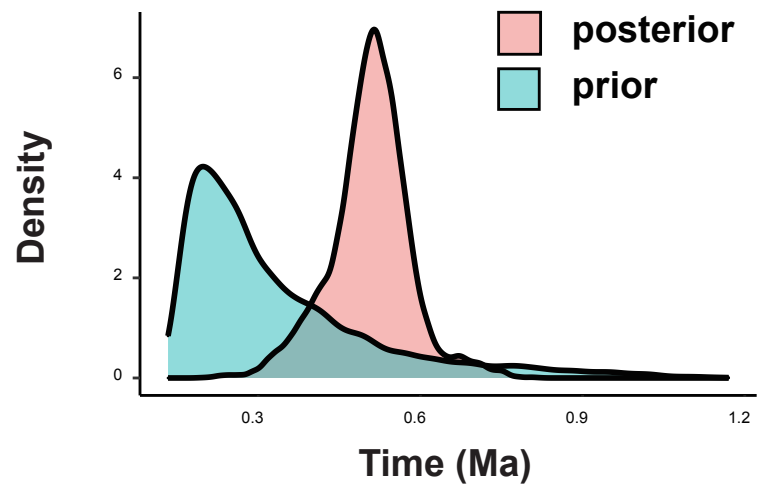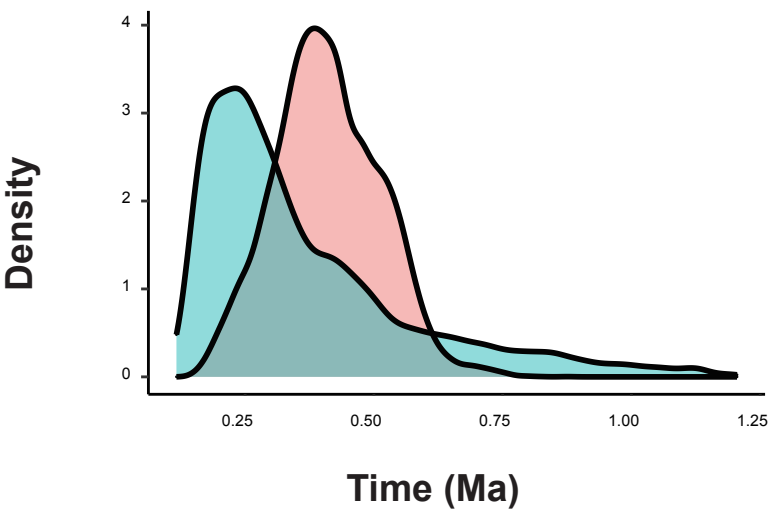



# Megophryidae

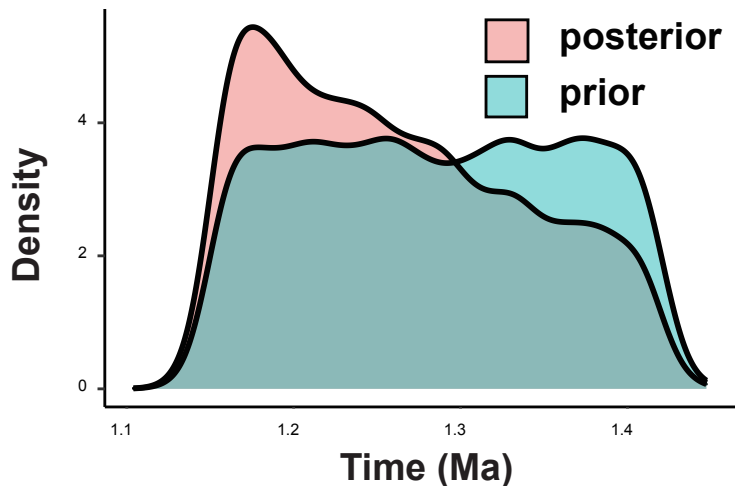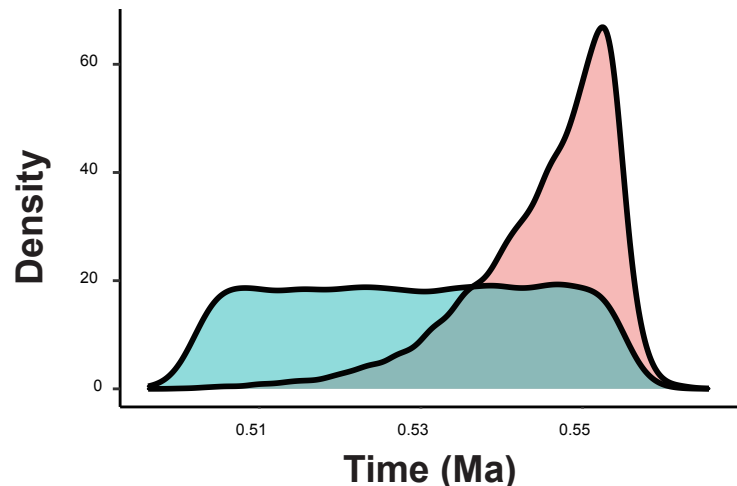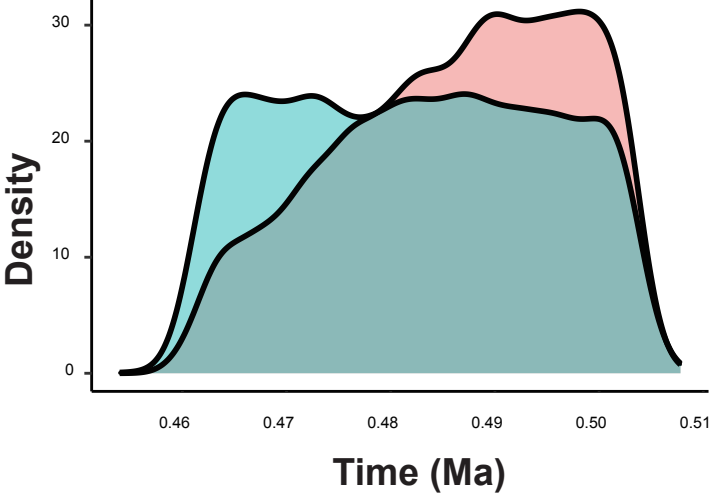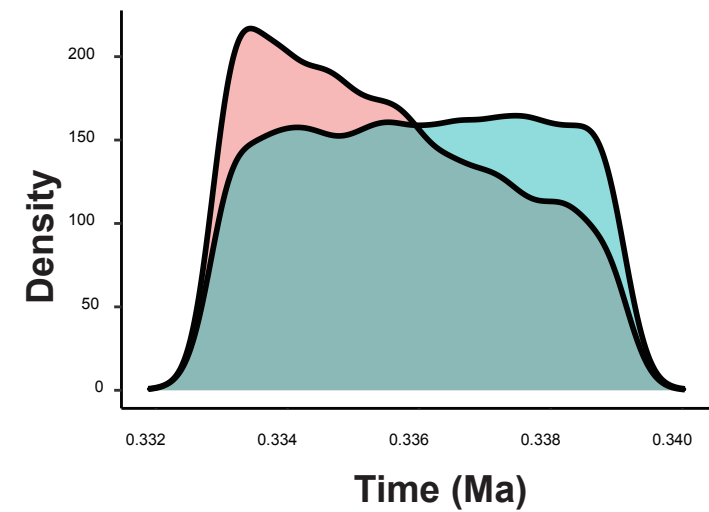

# Pareidae

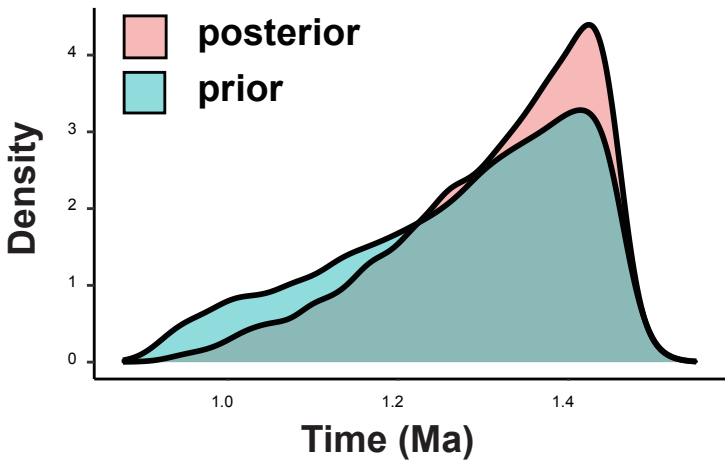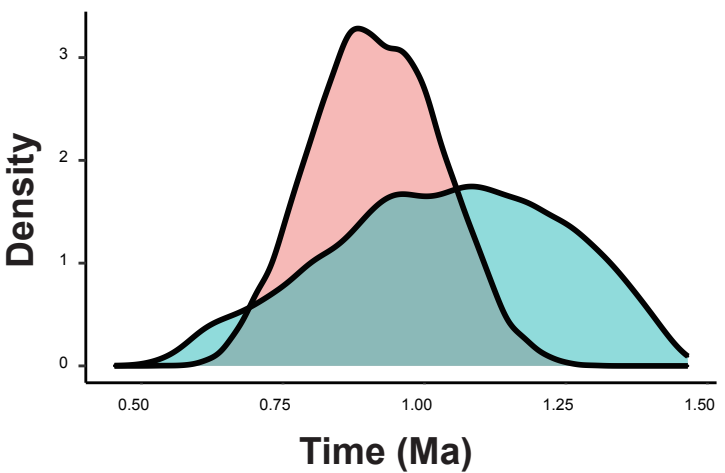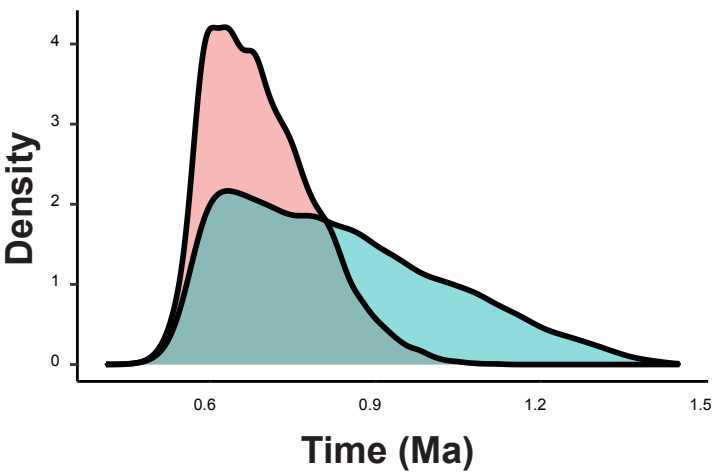

# Ranidae

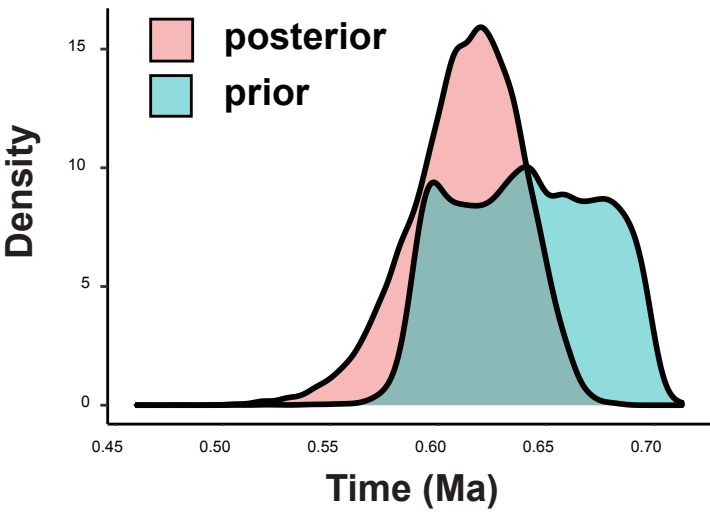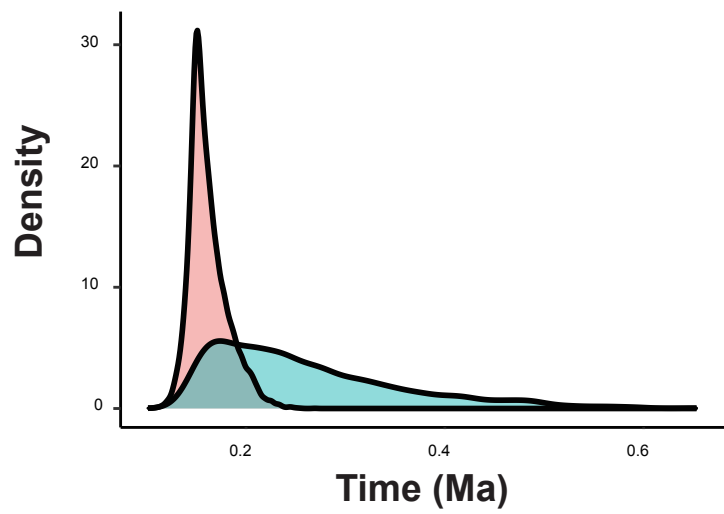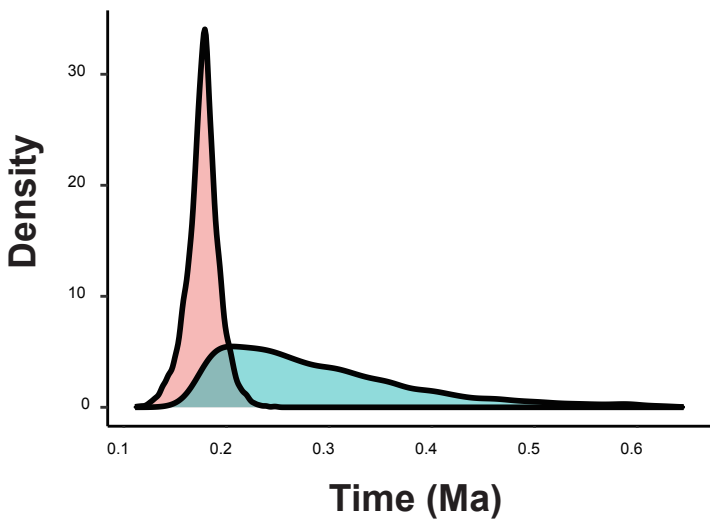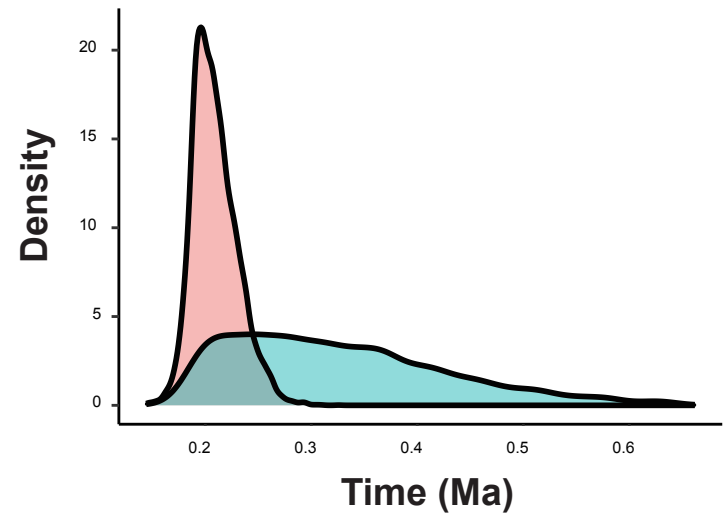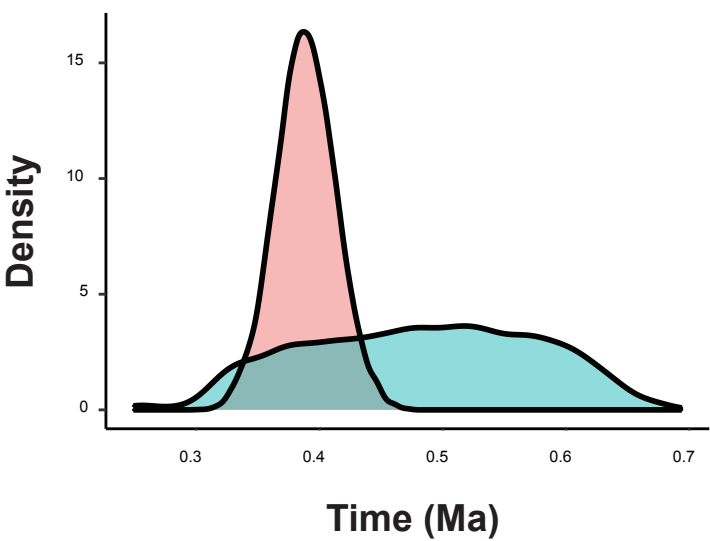

# Scincidae

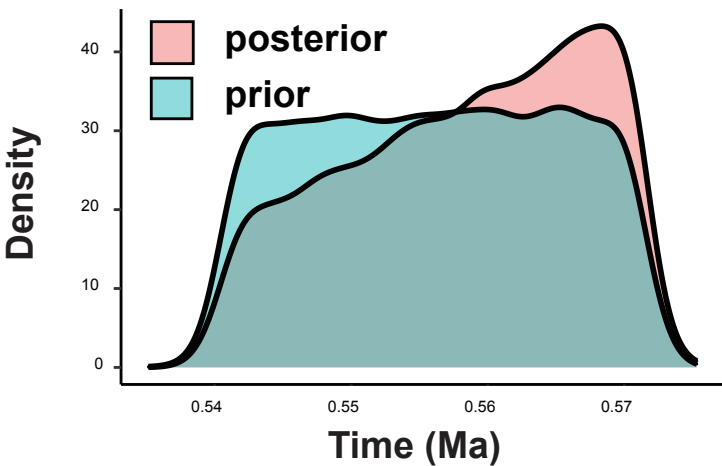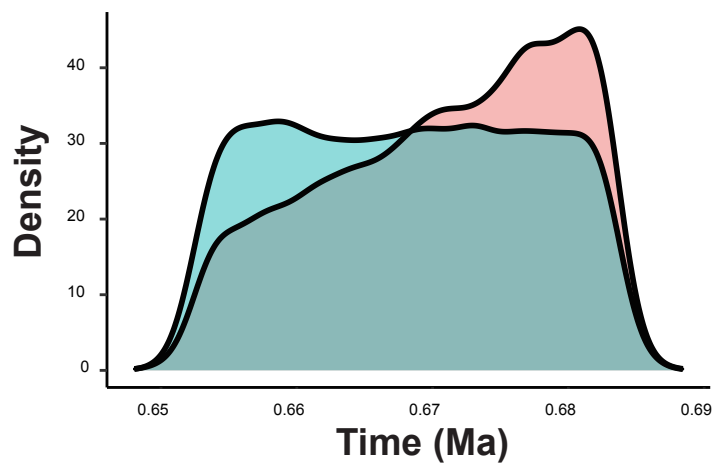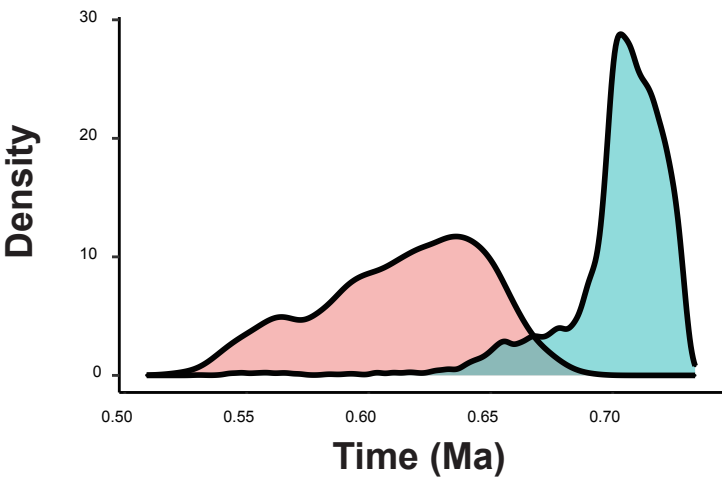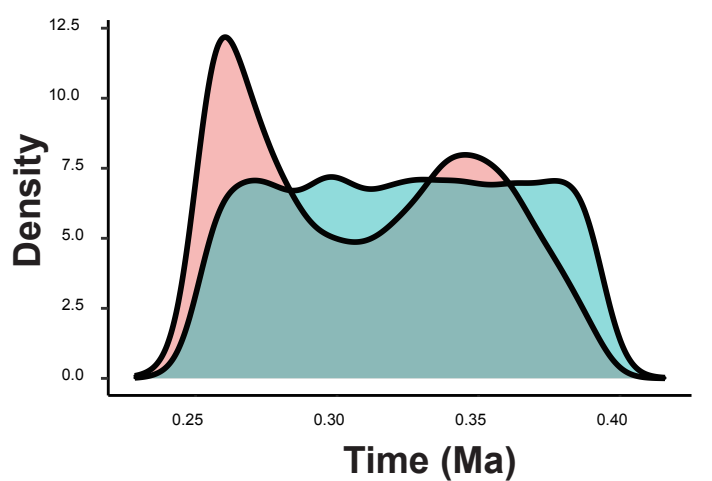

# Rhacophoridae

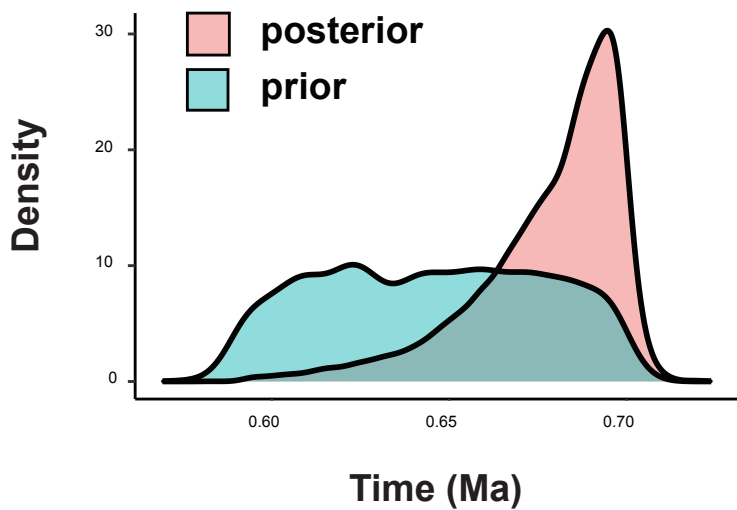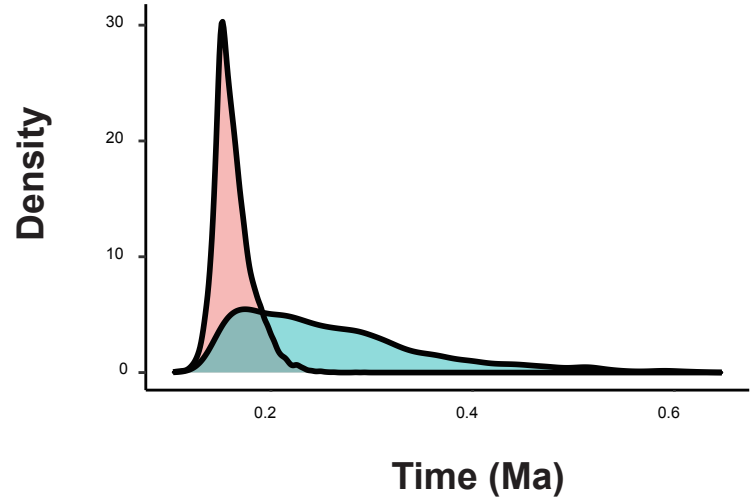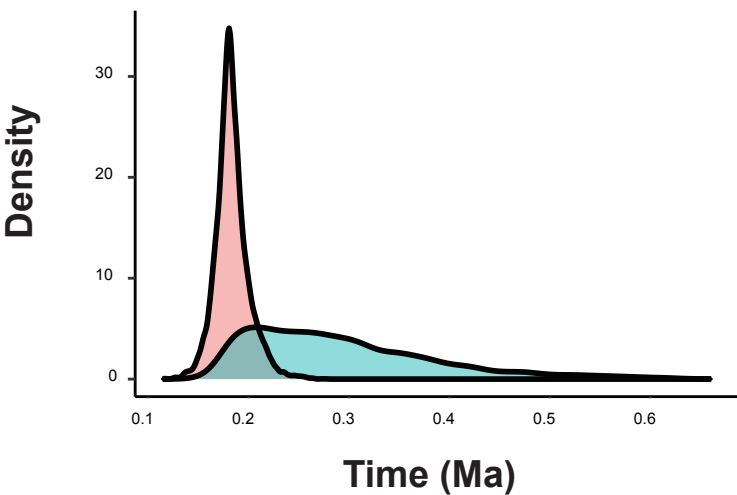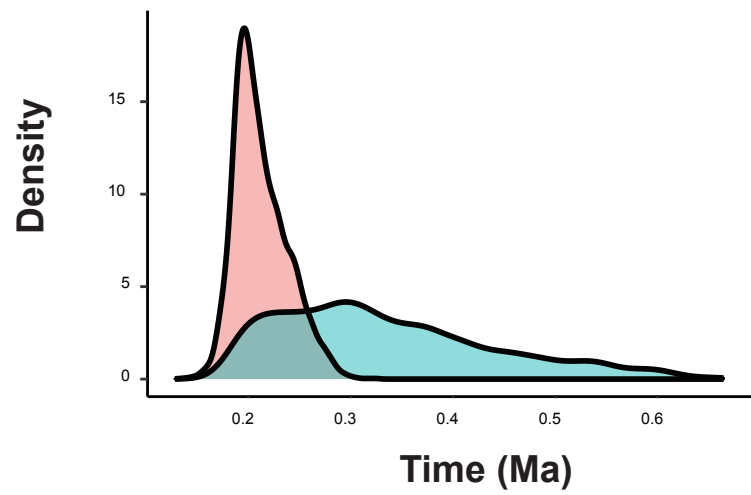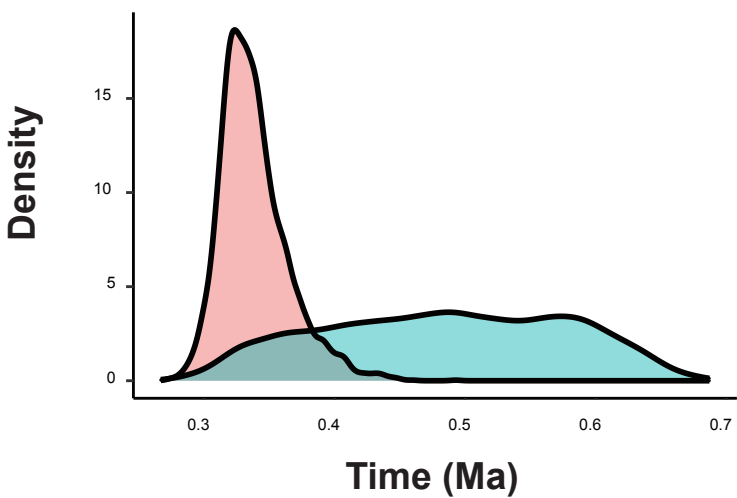

# Viperidae

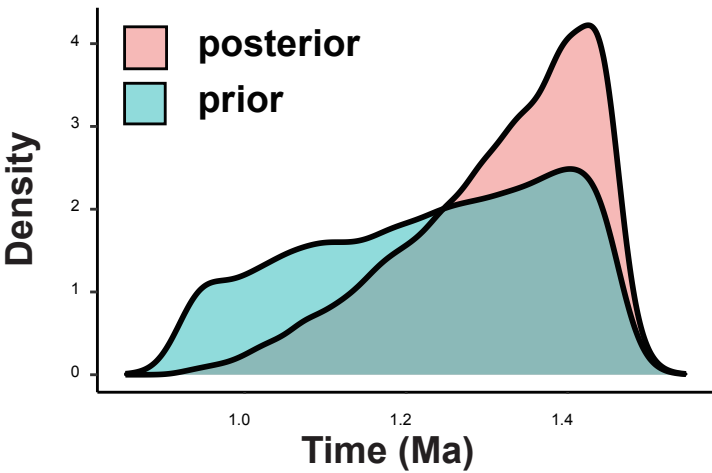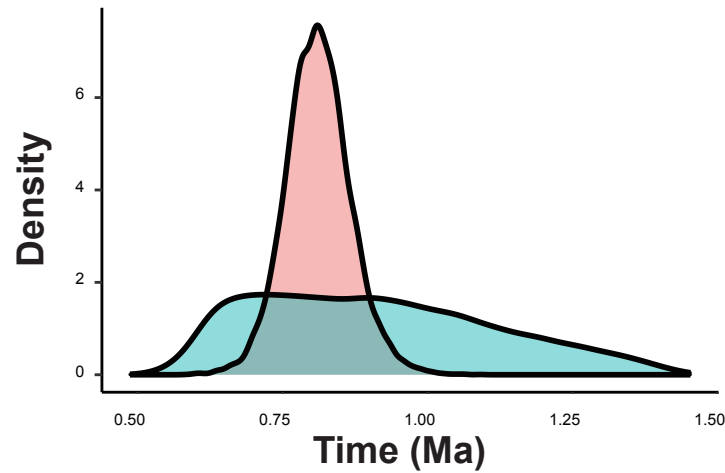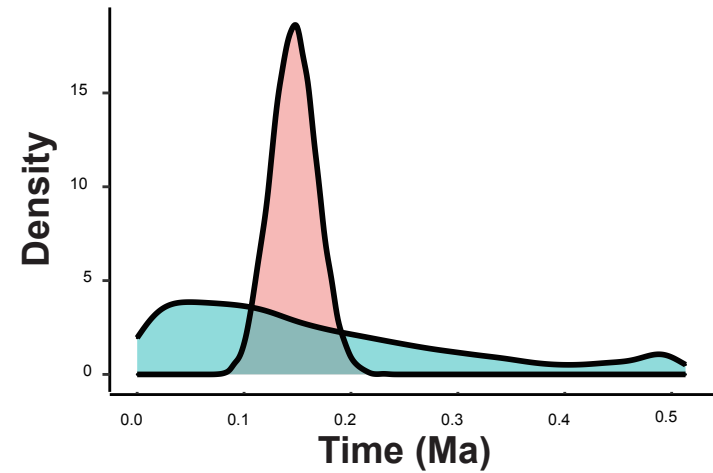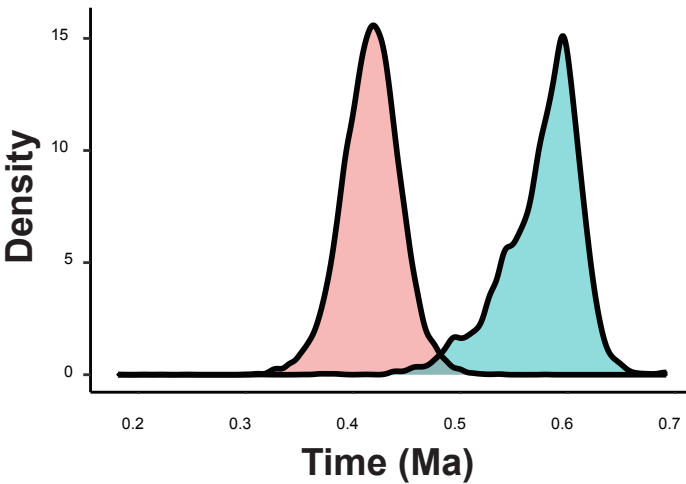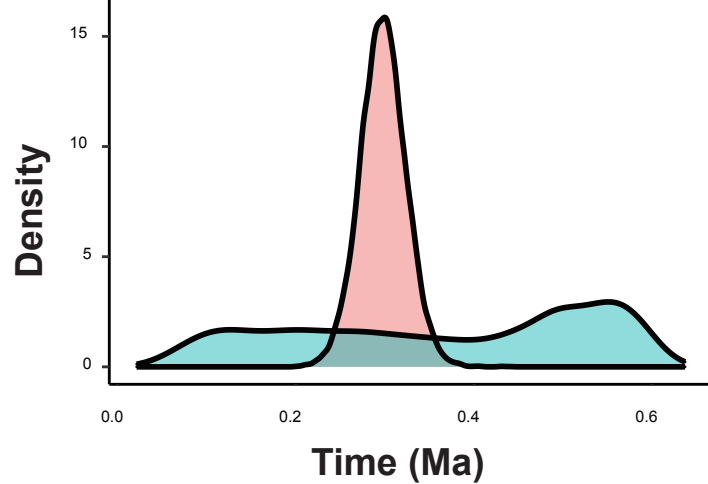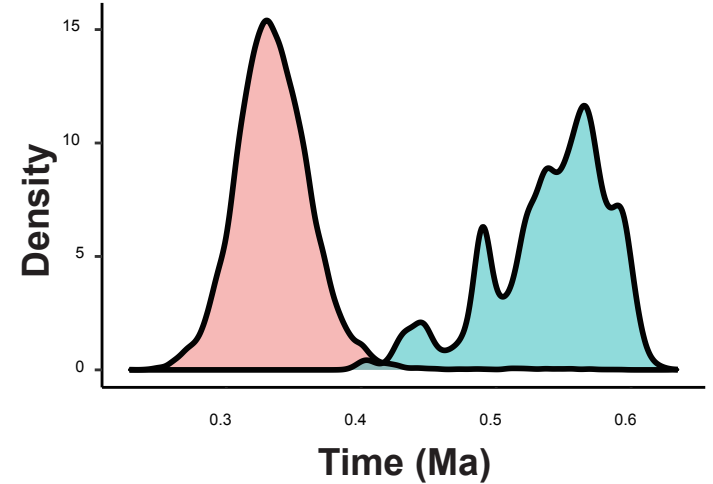

# Ceratobatrachidae

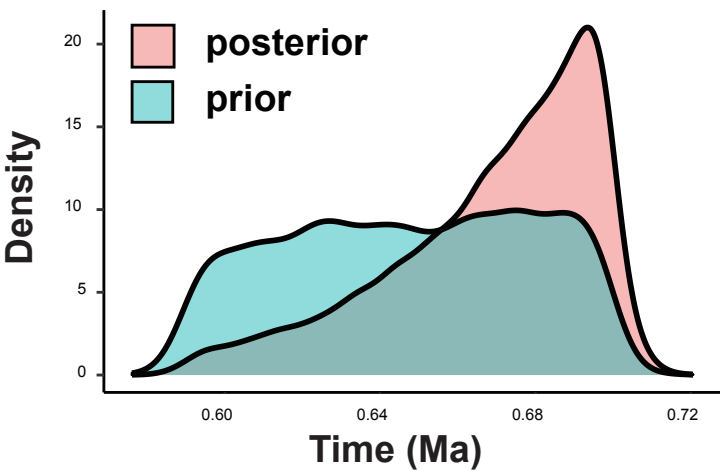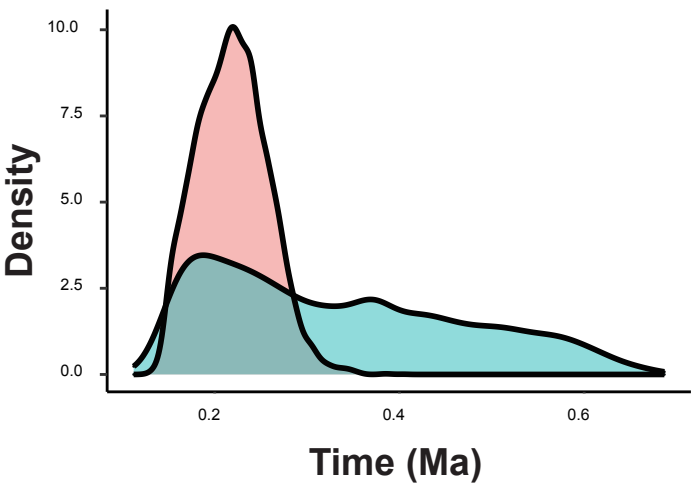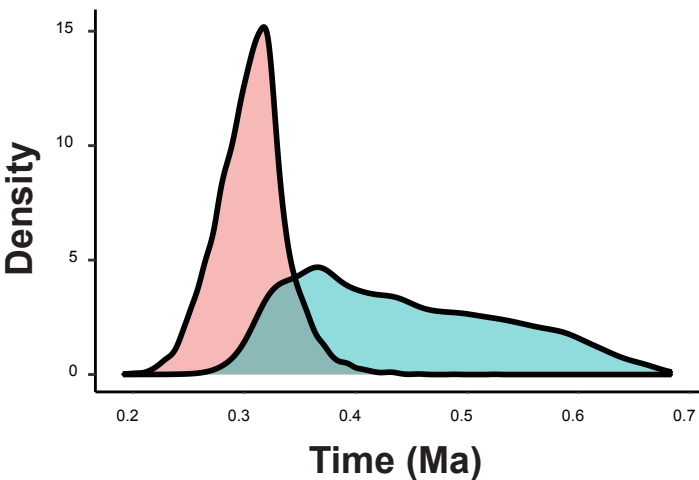

**Data S3.**

BioGeoBEARS analysis results based on two regions. Ancestral areas for reconstructed nodes are indicated by the following colors and letters: Red (A): the Himalaya; blue (B): non-Himalayan regions; black (AB): both regions; Red branches represent *in situ* diversification events, blue branches represent dispersal events, and gray branches were ambiguous. Black branches are not related to Himalayan diversification.



# Agamidae

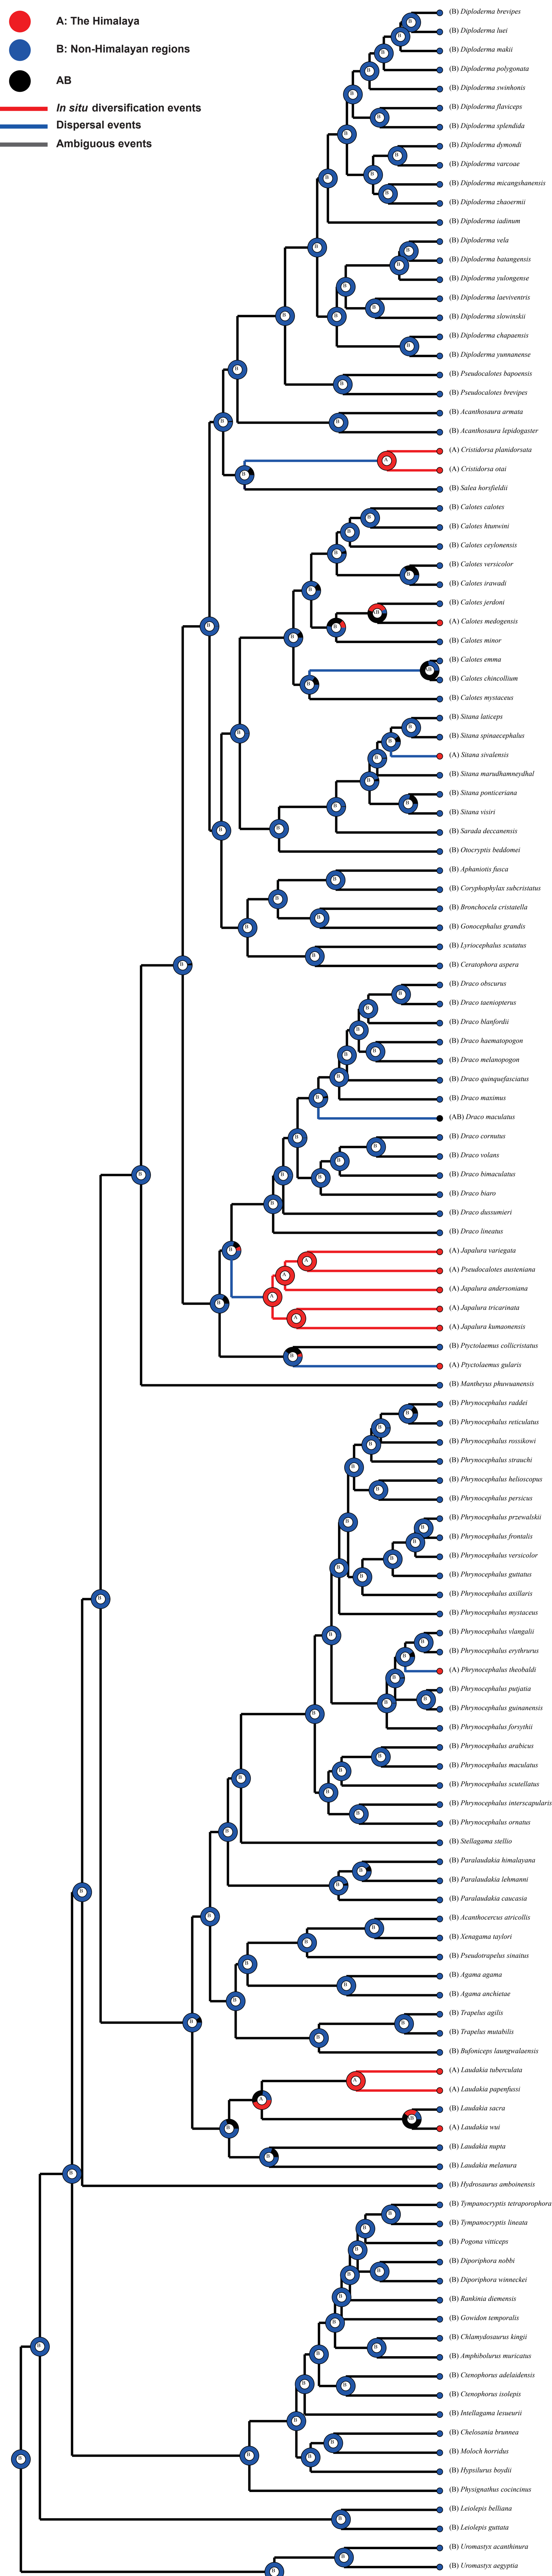

# Anguidae

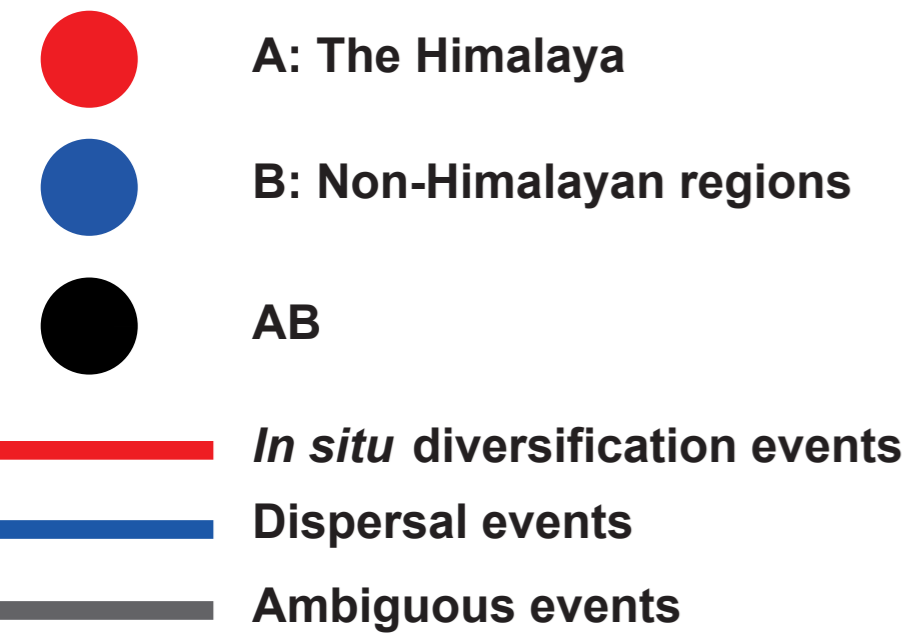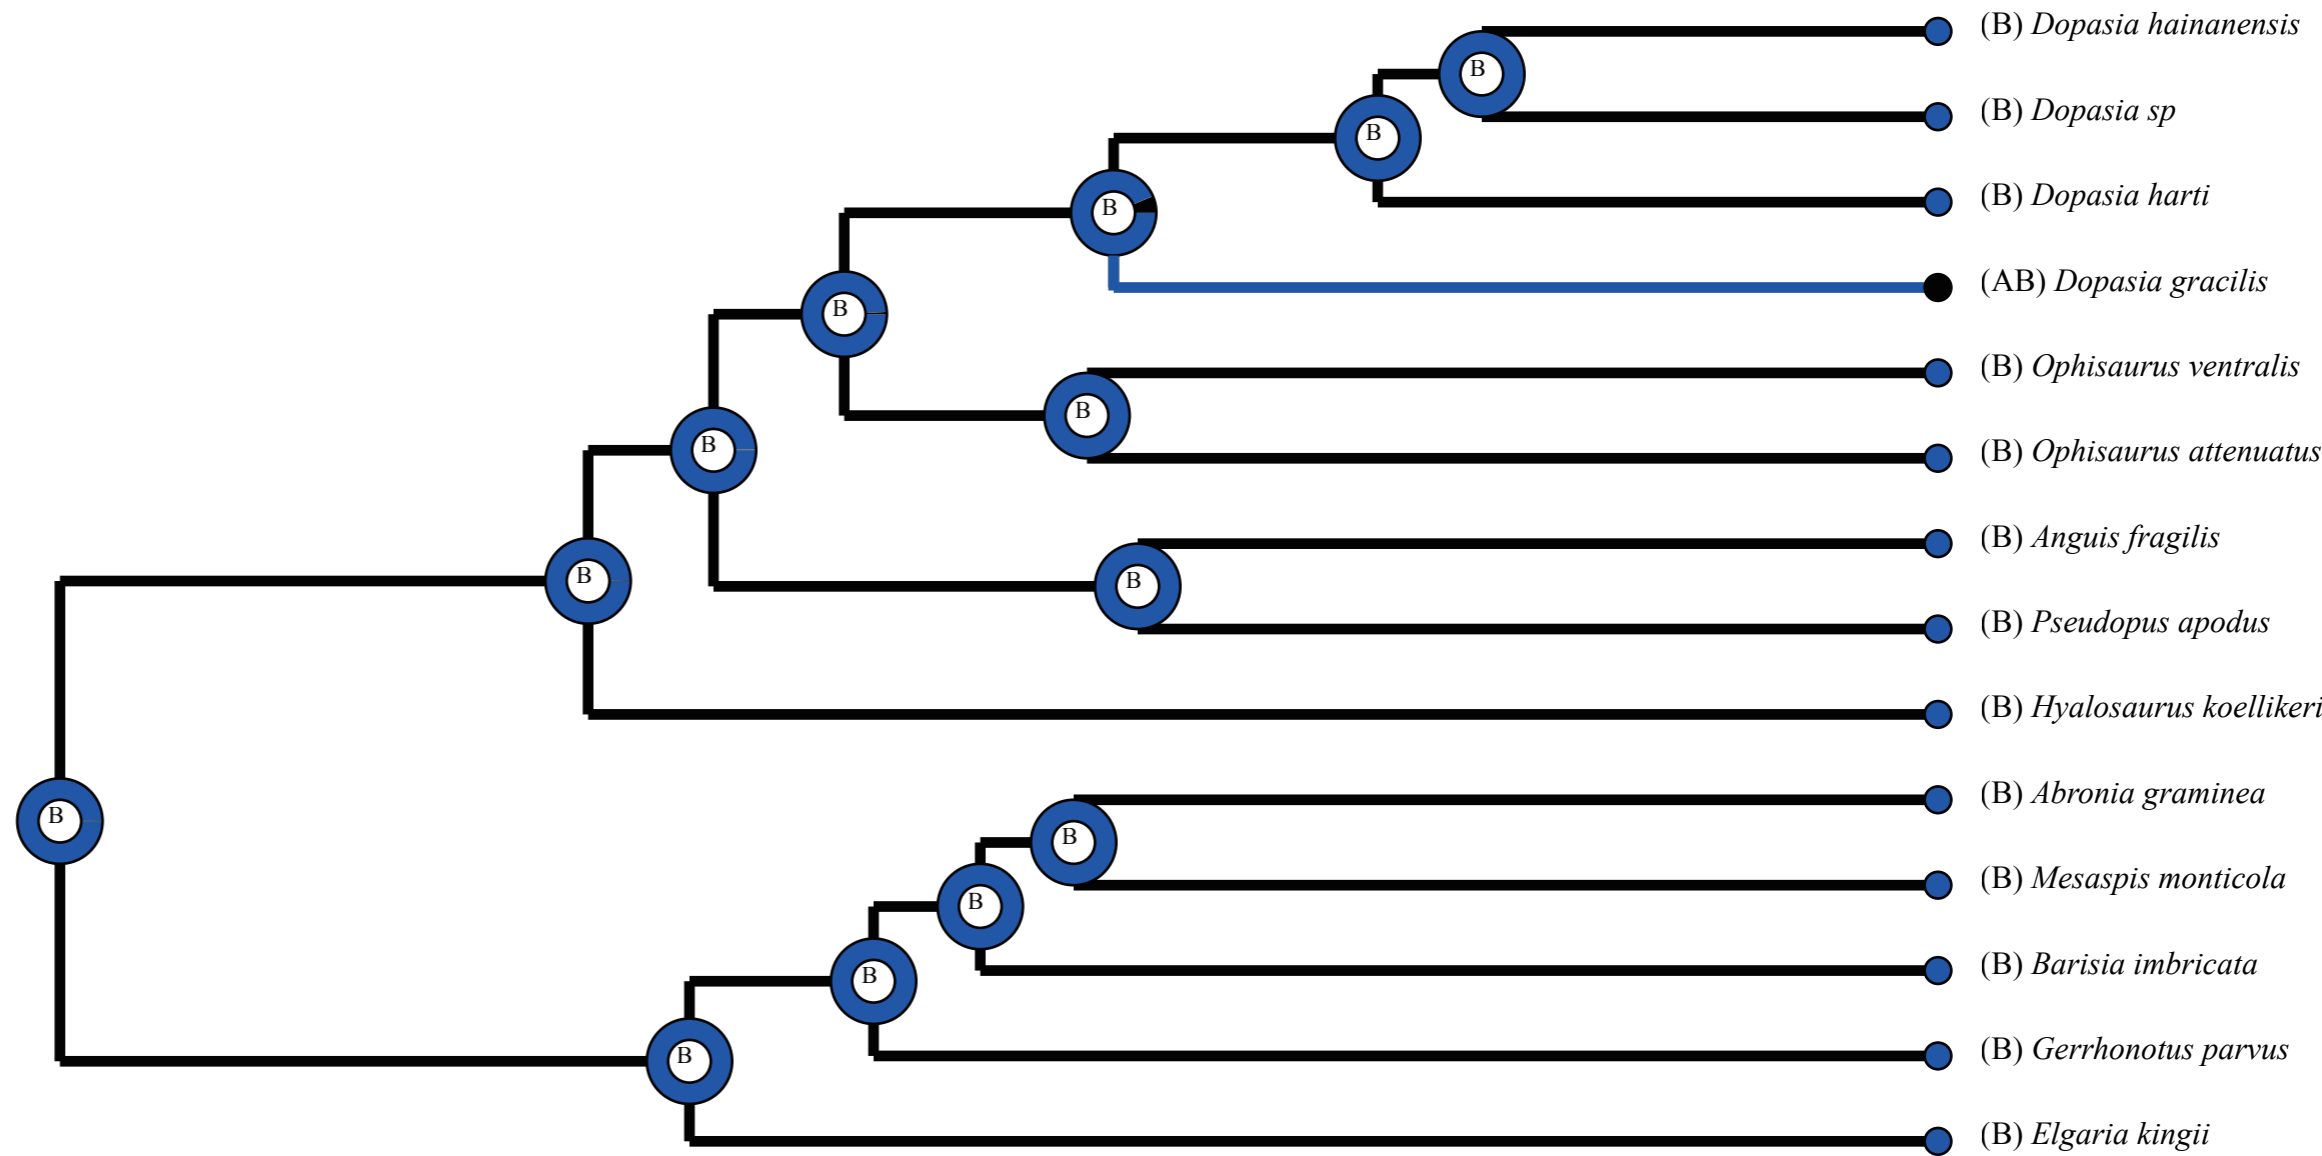

# Bufo

- **A: The Himalaya**
- **B: Non-Himalayan regions**
- **AB**
- **In situ diversification events**
- **Dispersal events**
- **Ambiguous events**

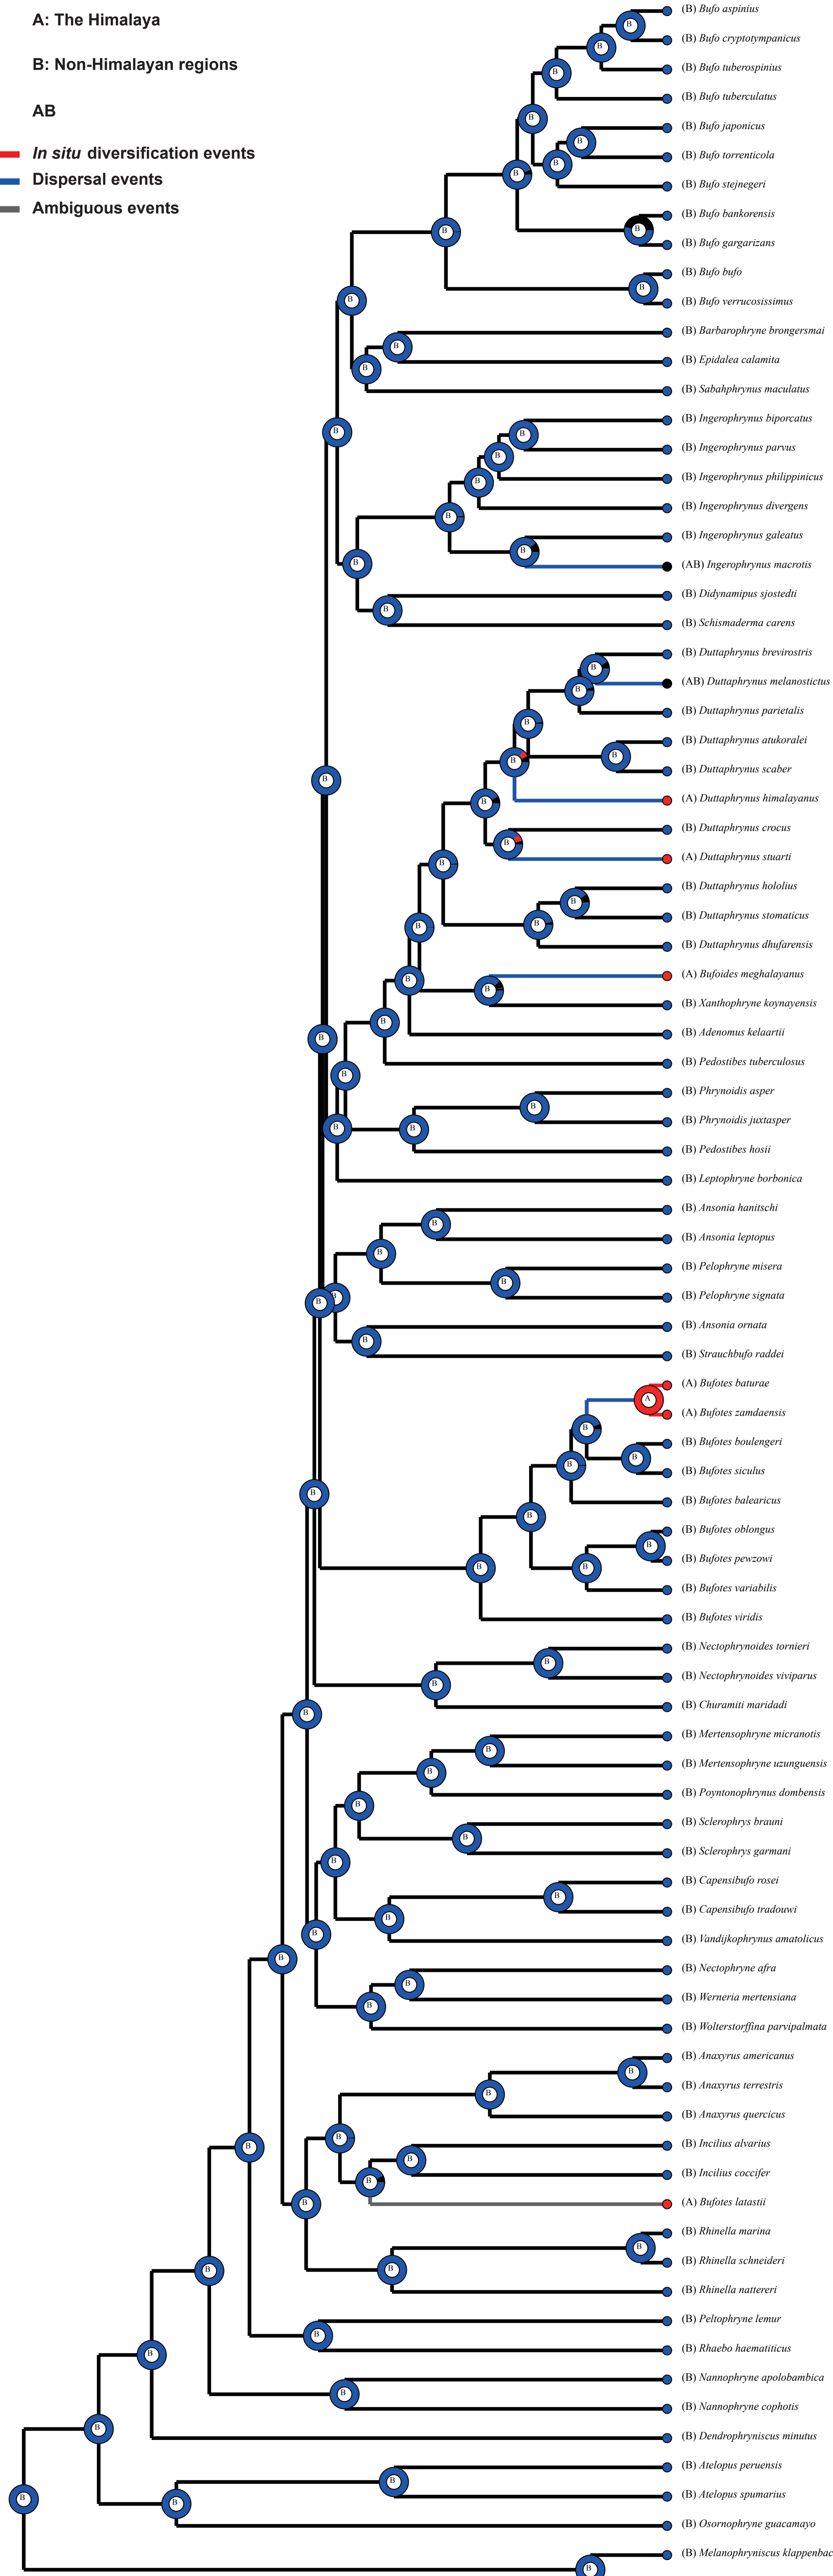

# Ceratobatrachidae

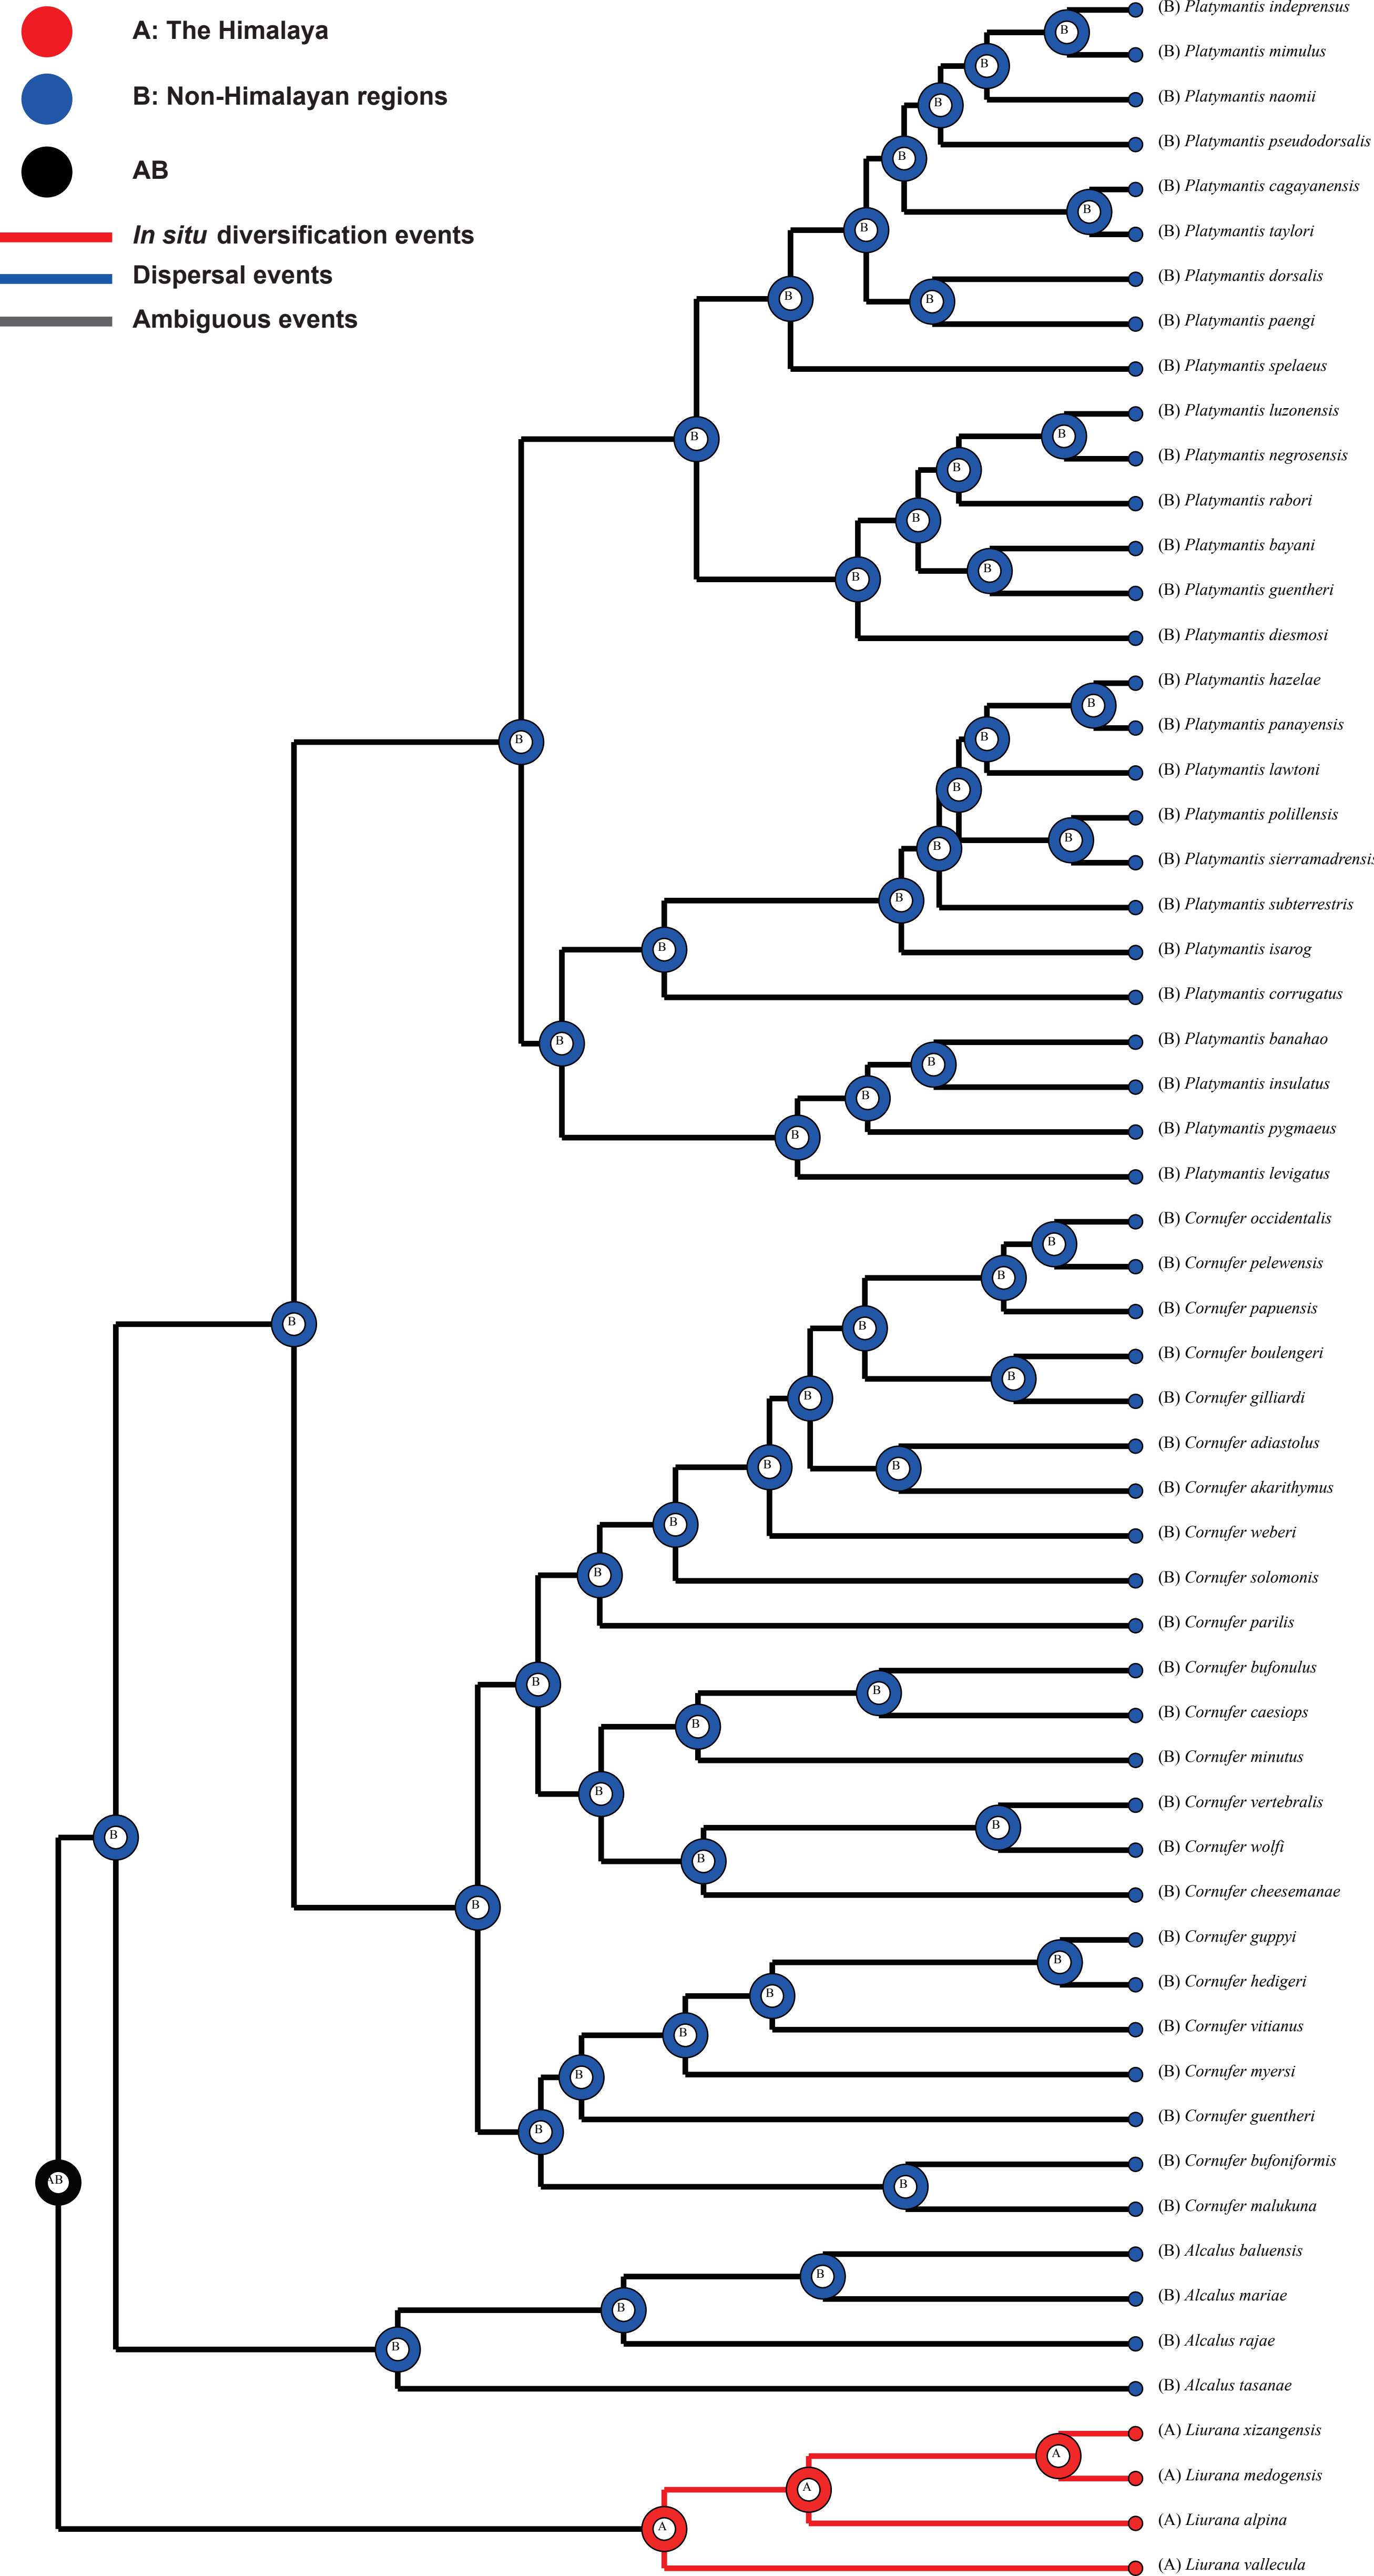

# Colubridae

● **A: The Himalaya**  
● **B: Non-Himalayan regions**  
● **AB**  
— **In situ diversification events**  
— **Dispersal events**  
— **Ambiguous events**

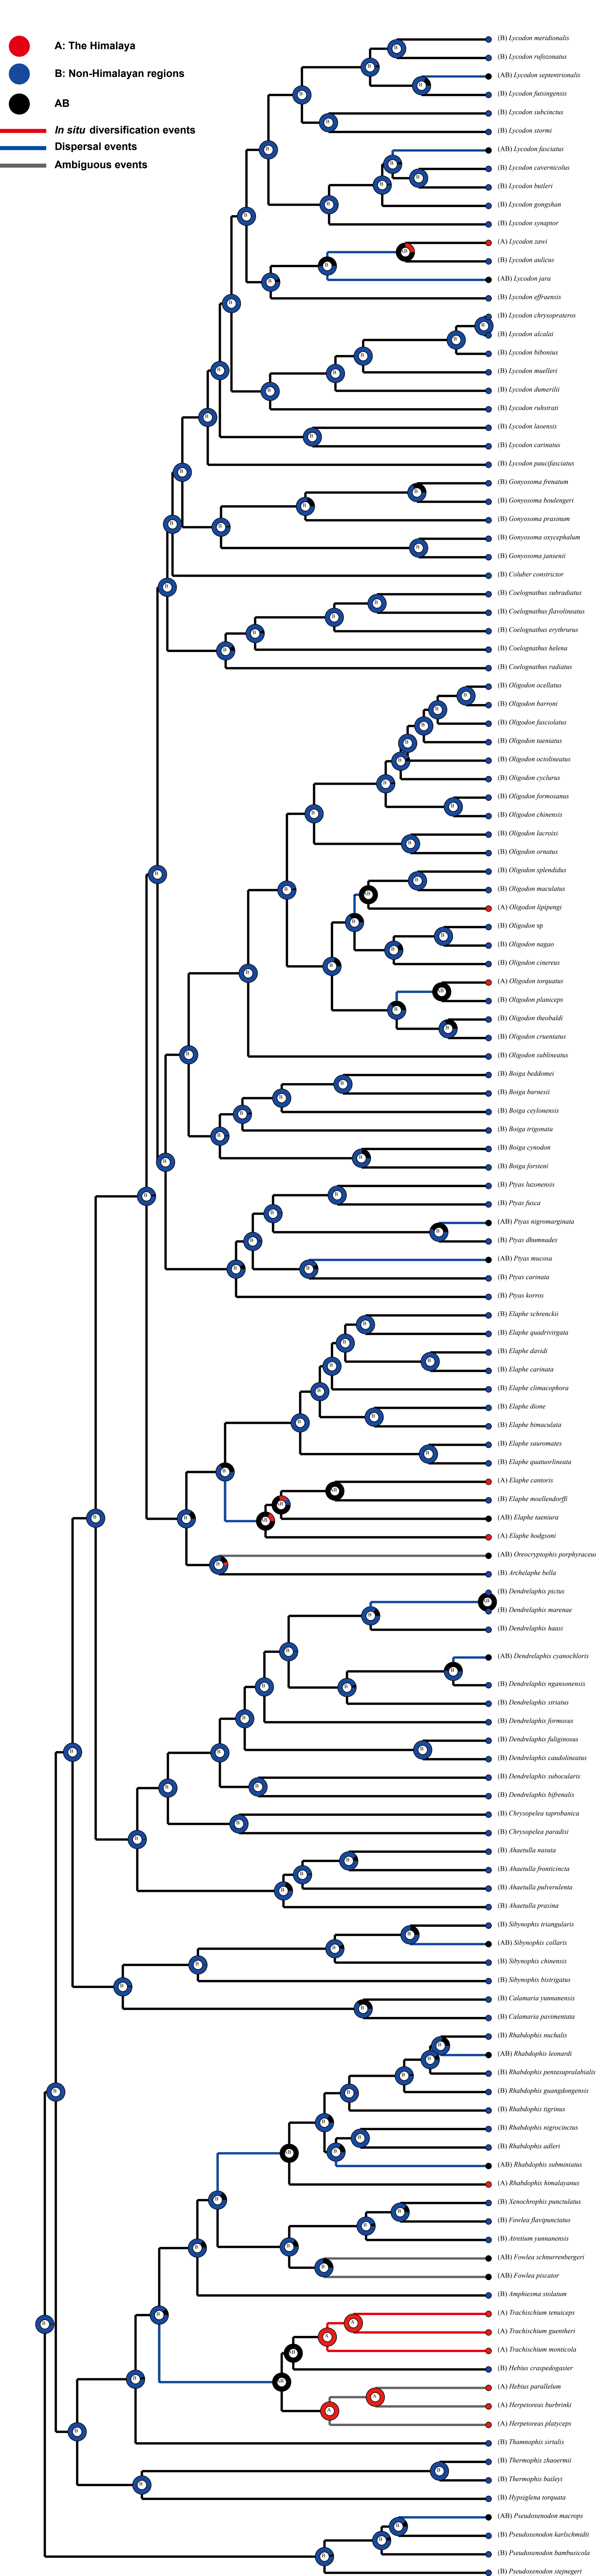

# Dicroglossidae

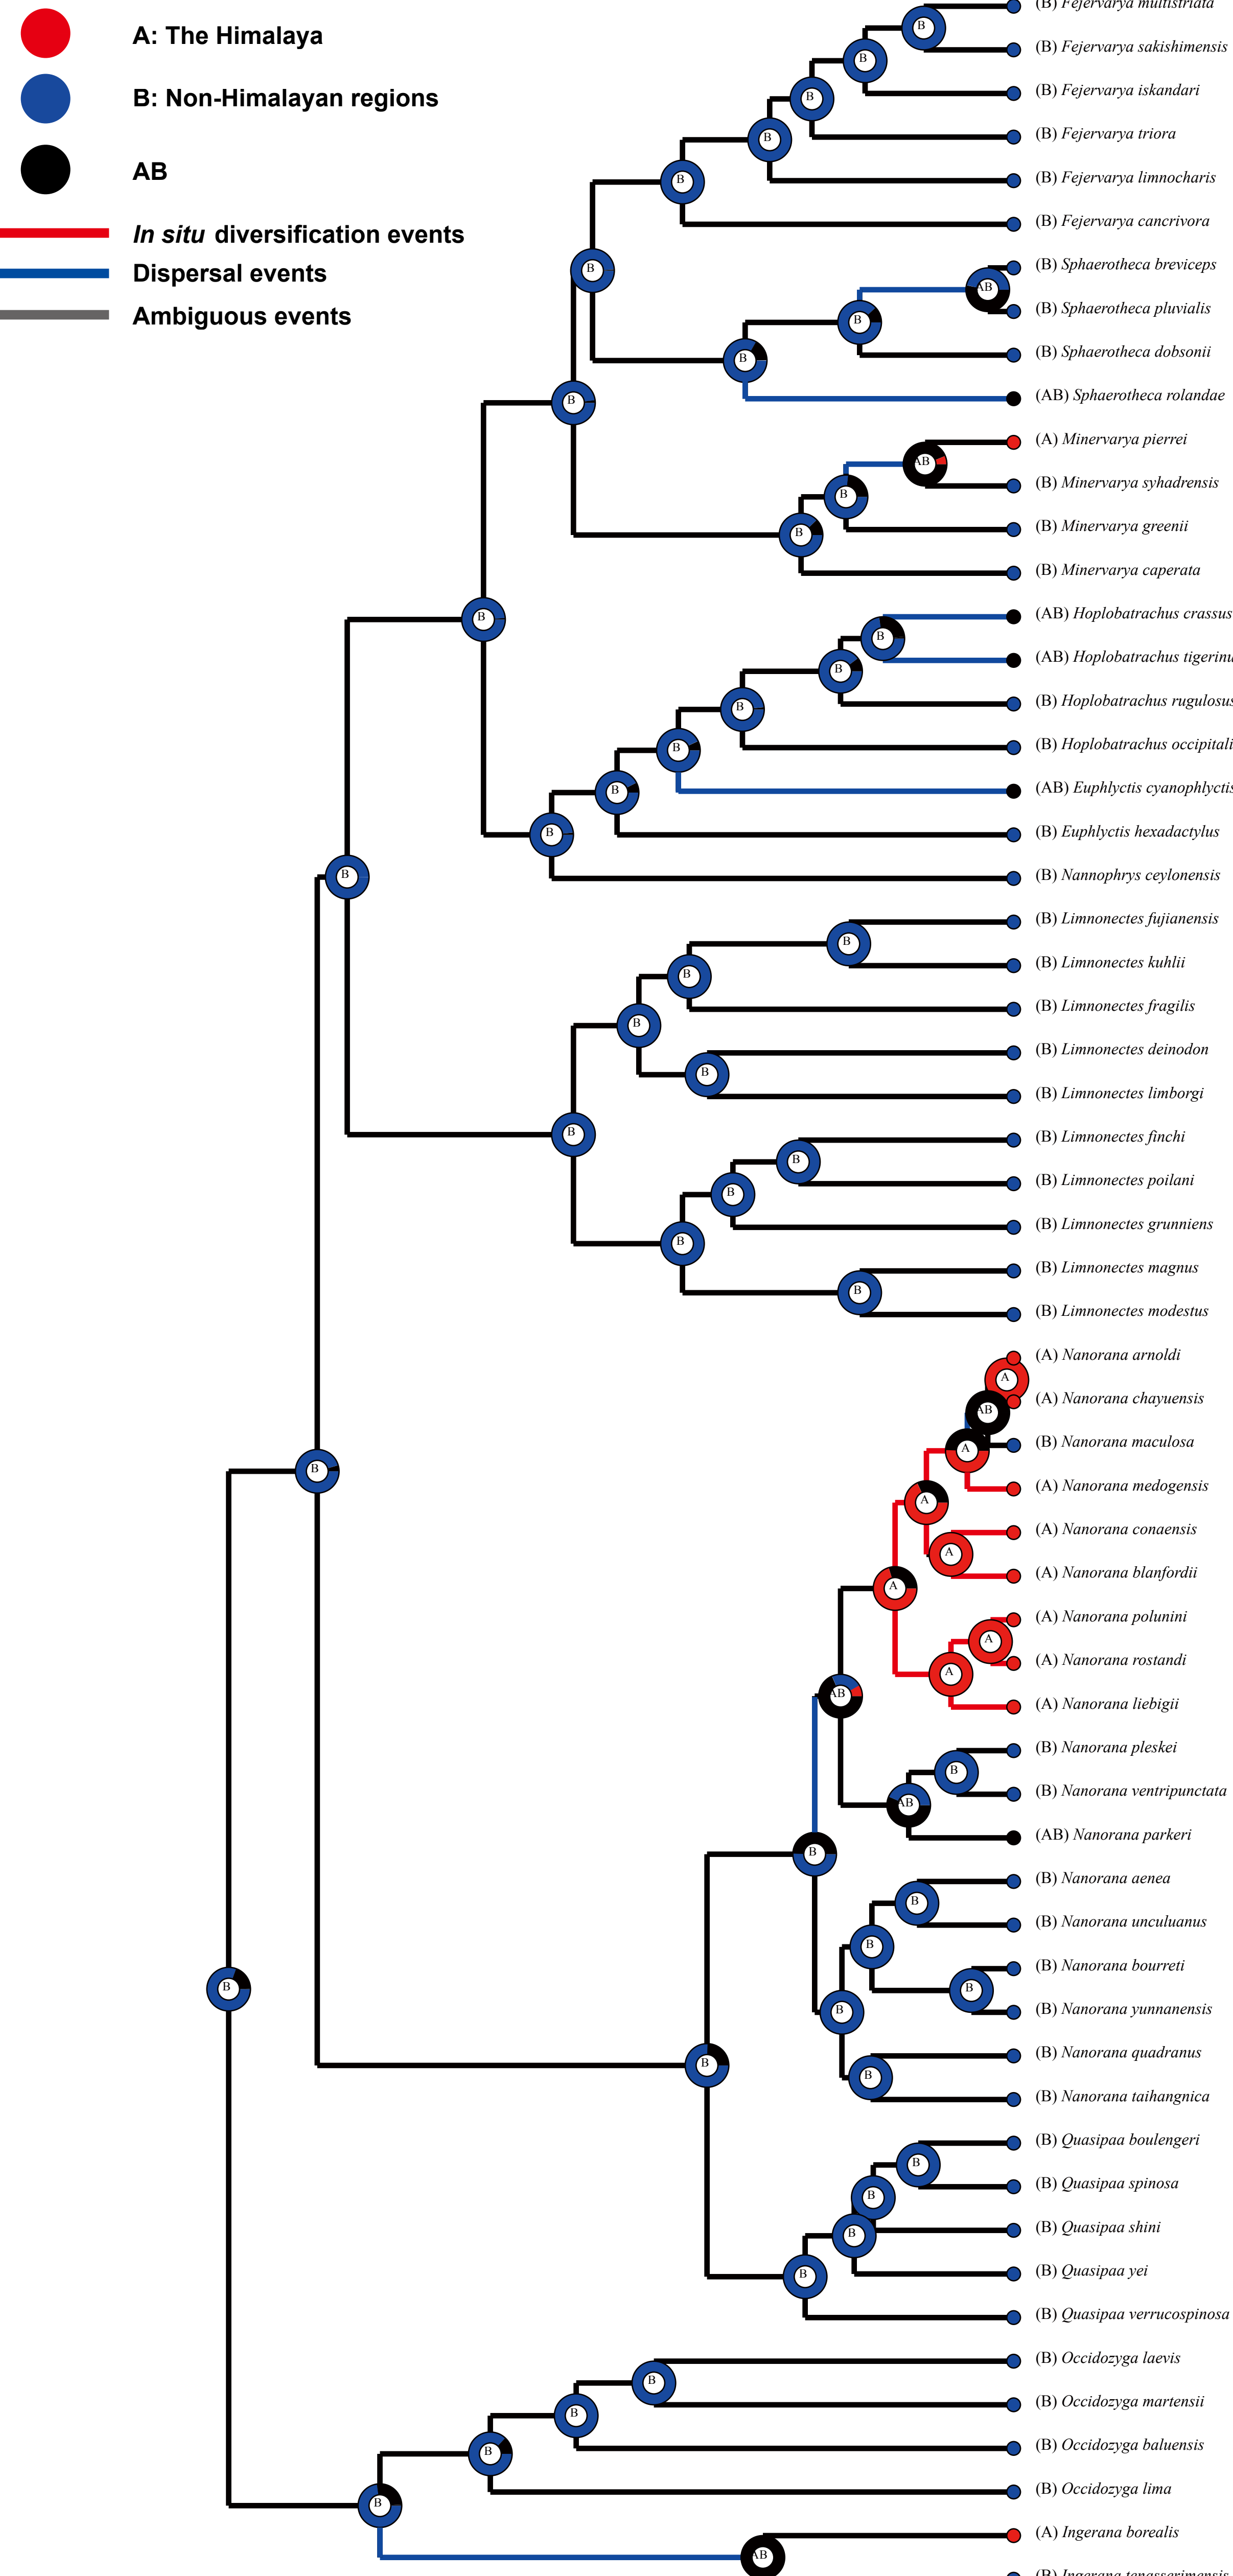

# Elapidae

● **A: The Himalaya**  
● **B: Non-Himalayan regions**  
● **AB**  
— **In situ diversification events**  
— **Dispersal events**  
— **Ambiguous events**

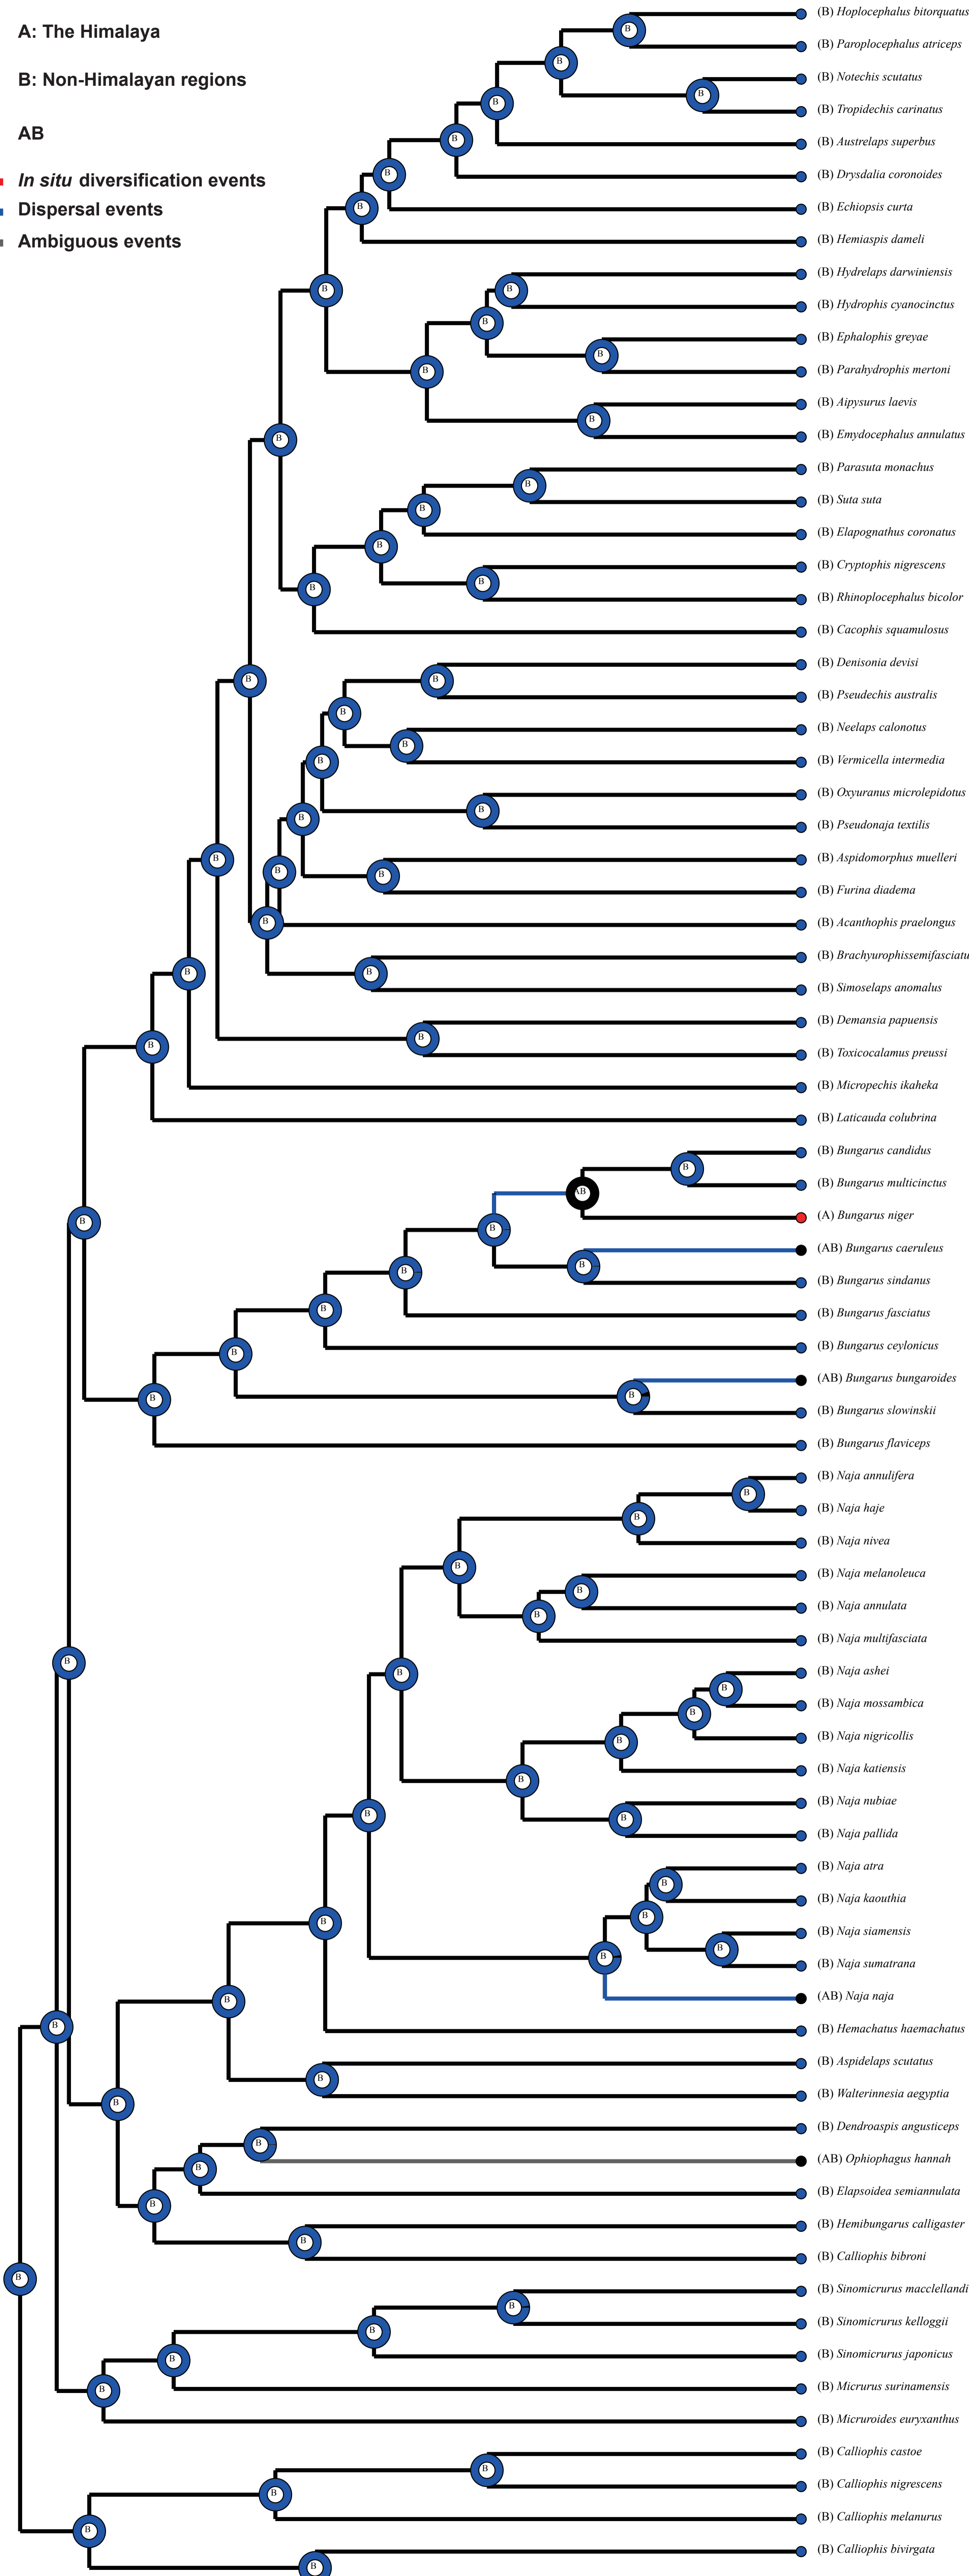

# Gekkonidae

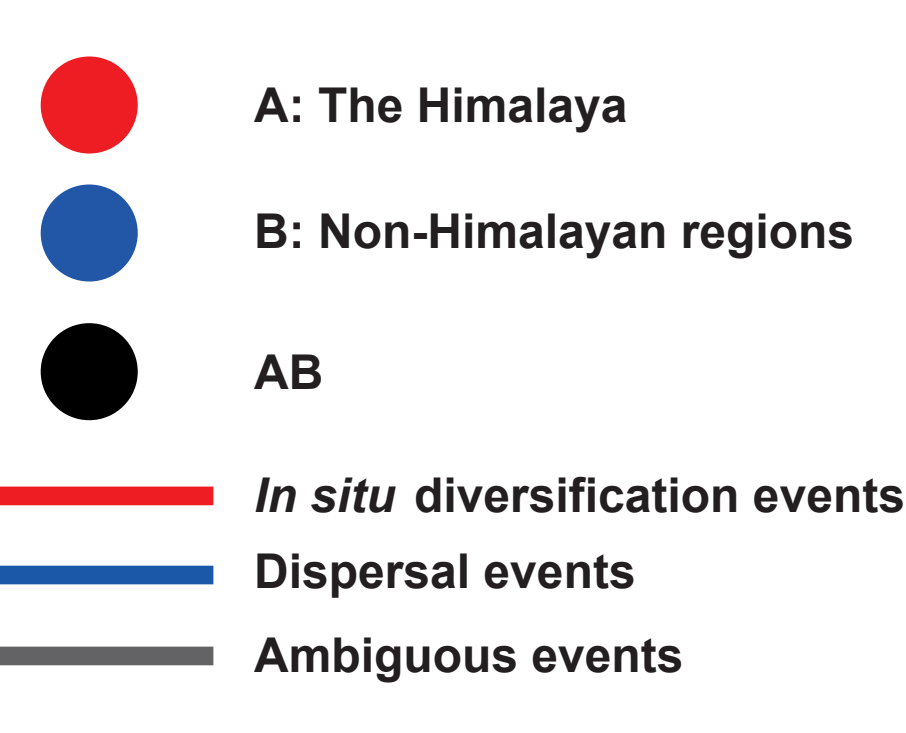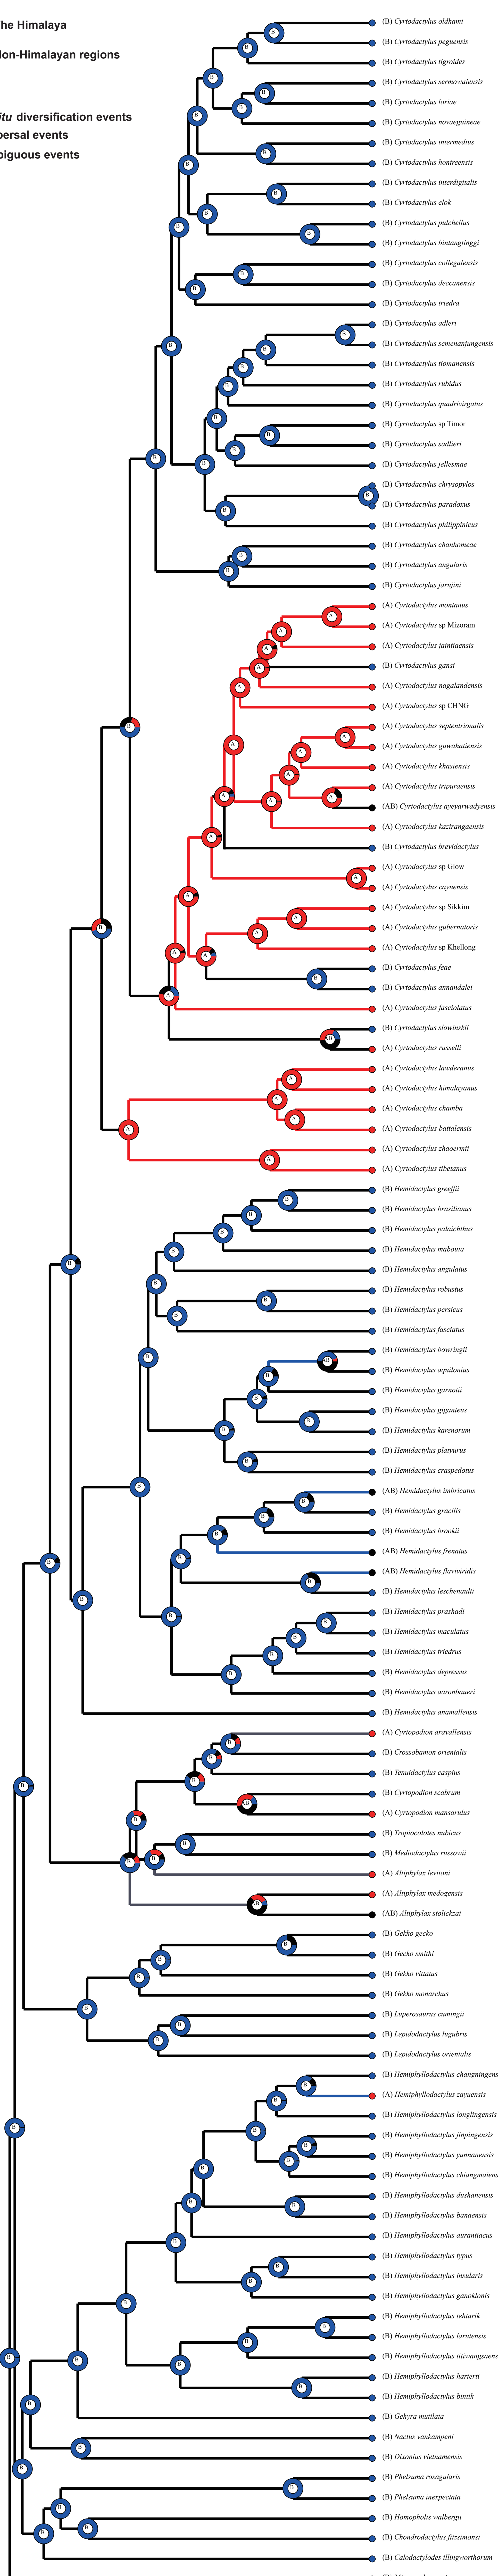



# Megophryidae

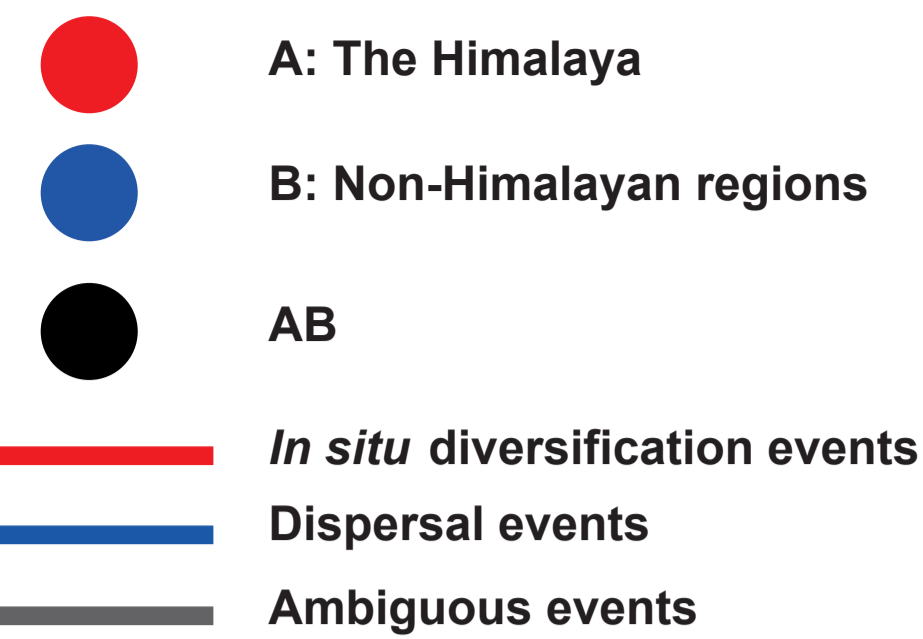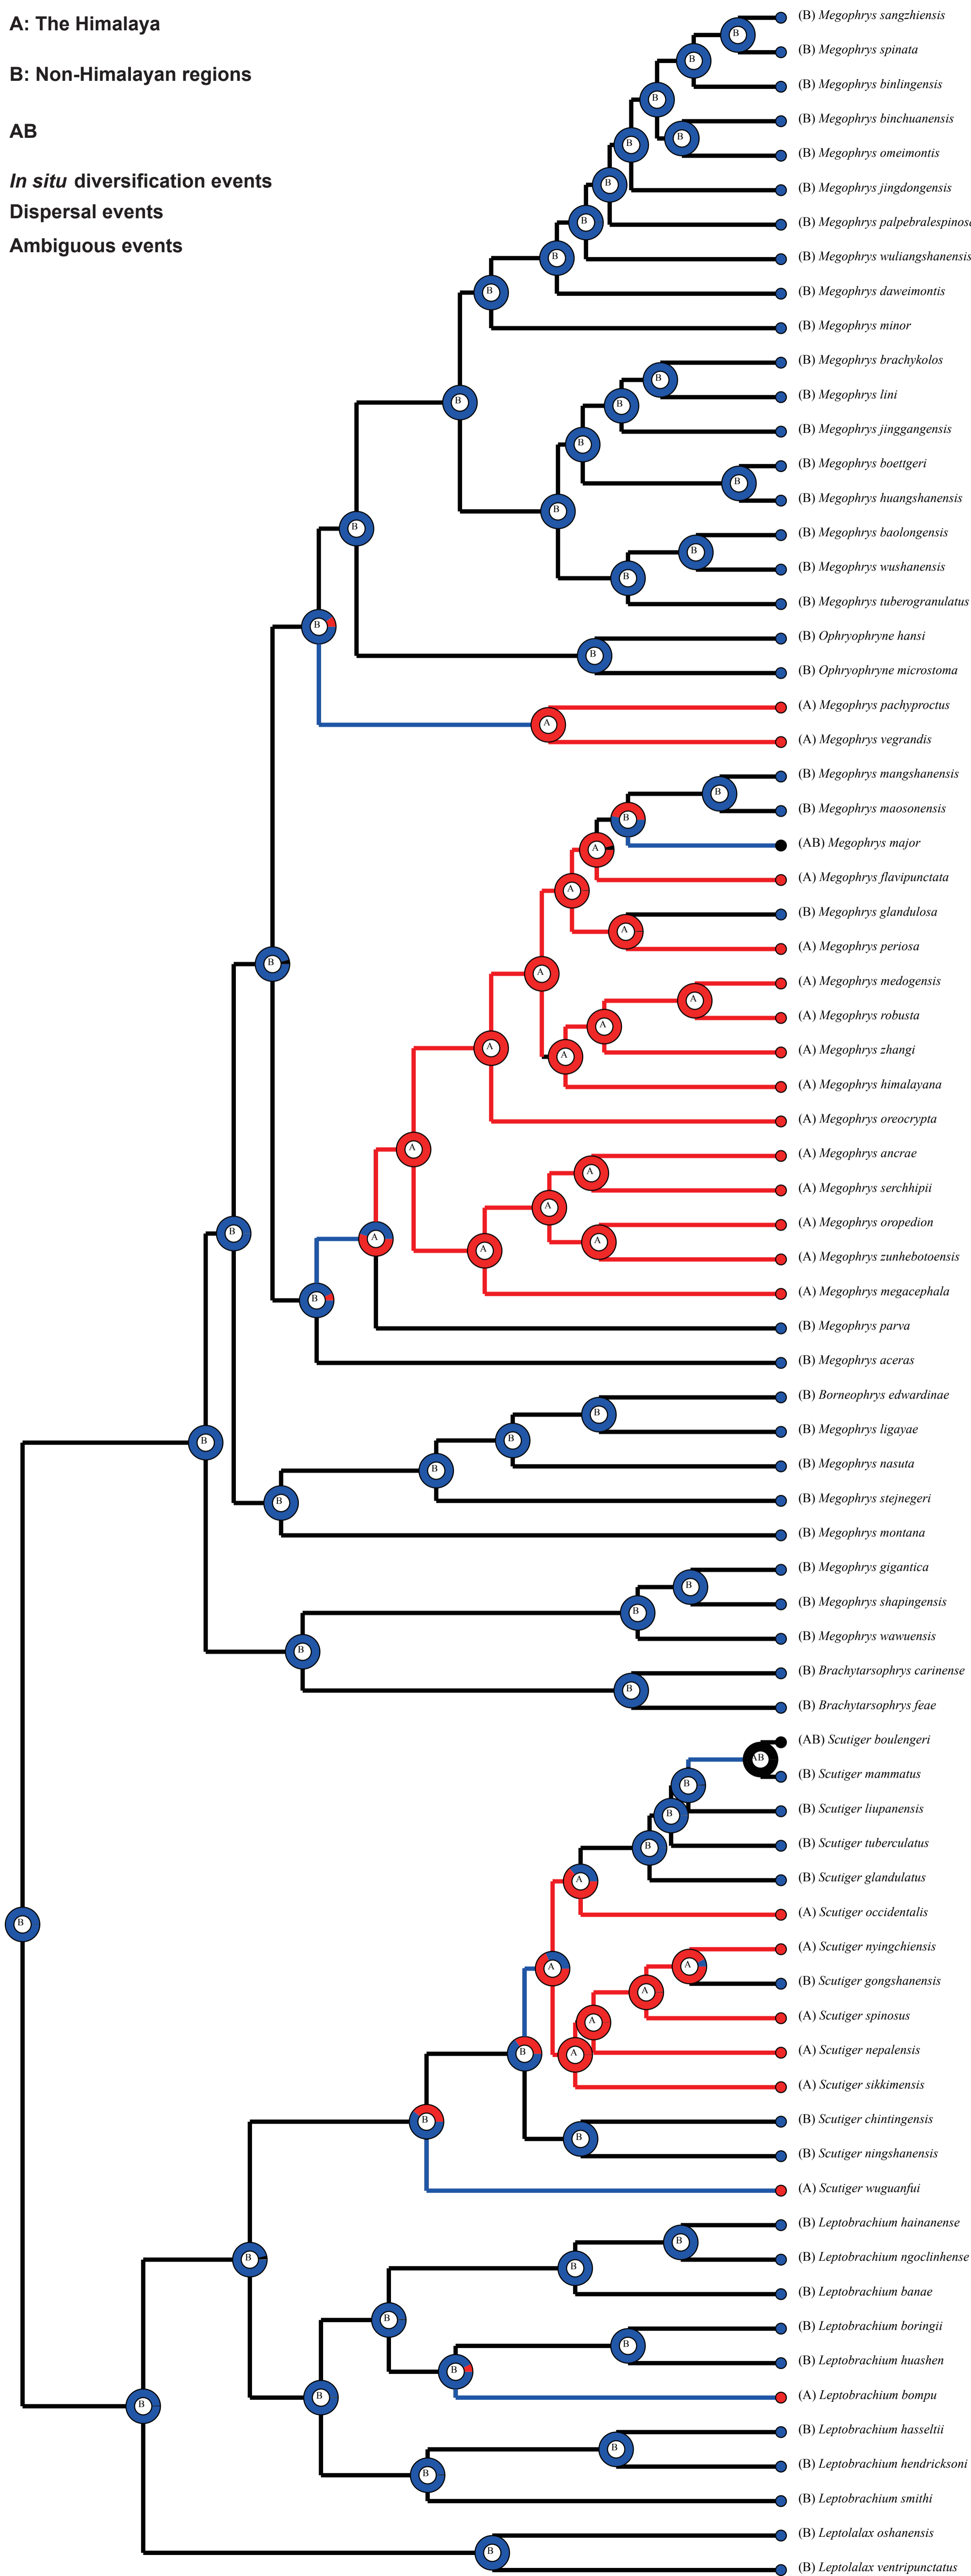

# Pareidae

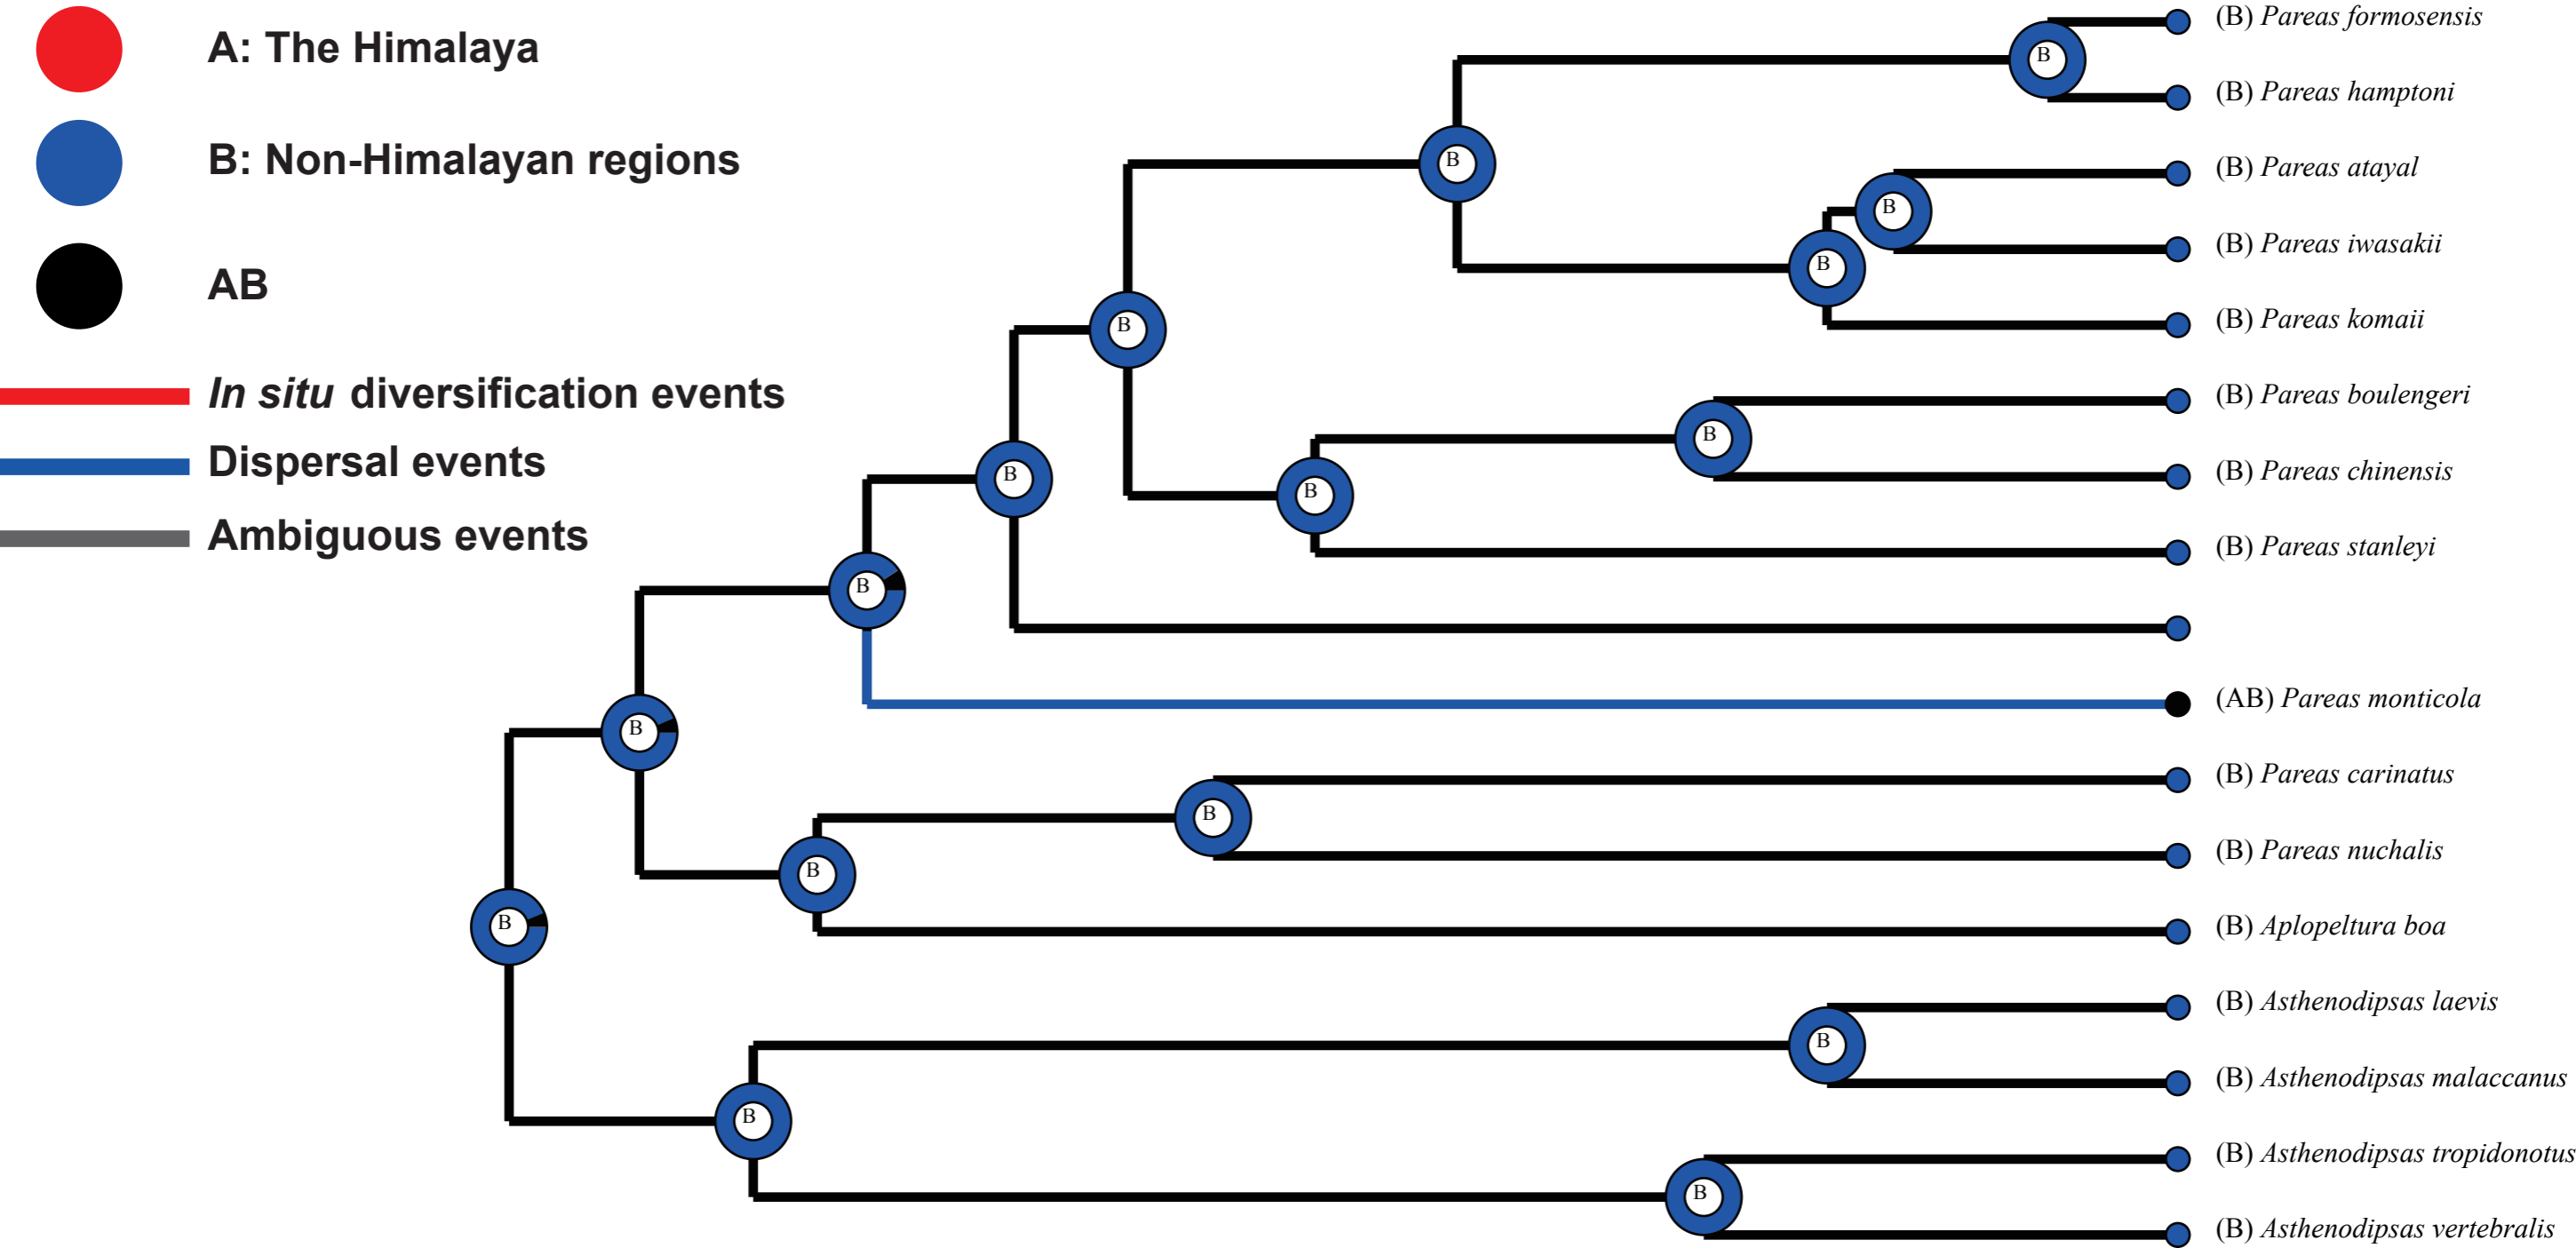

# Ranidae

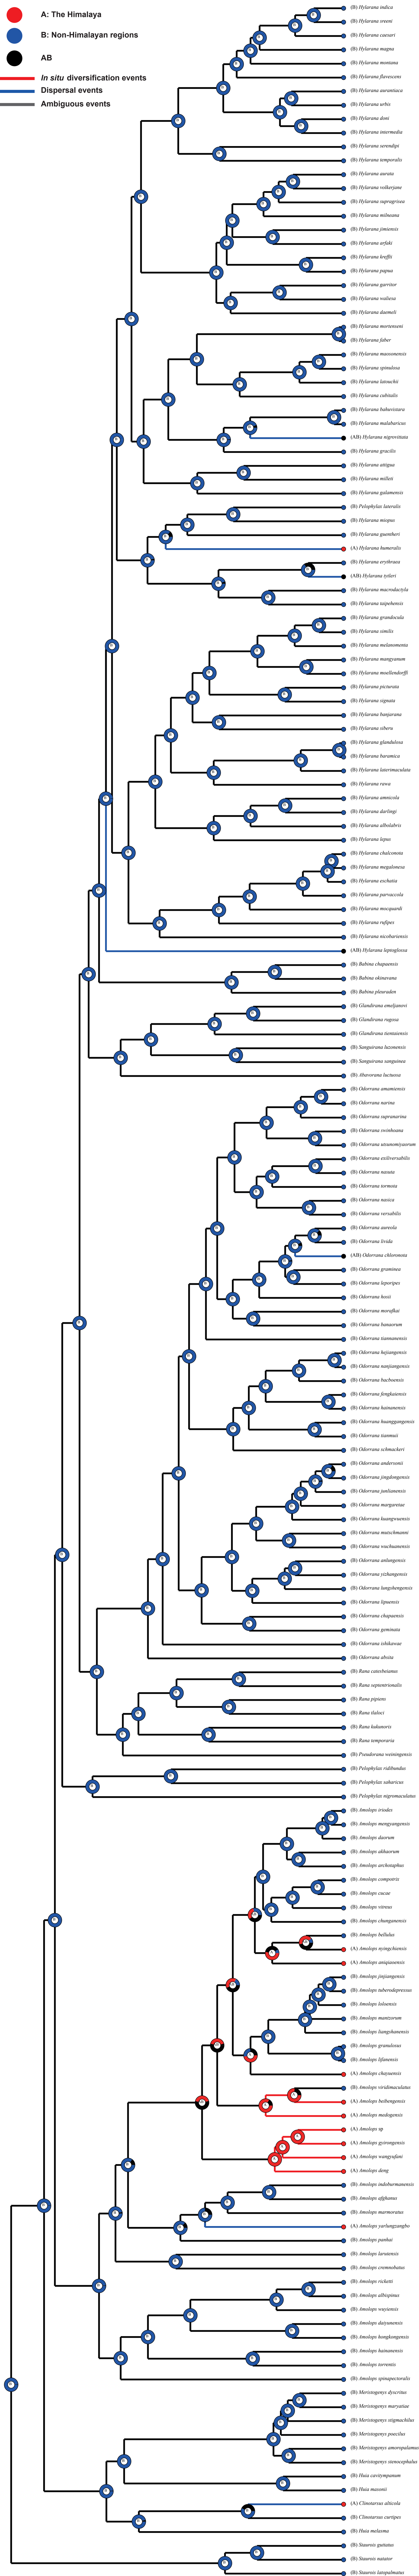

# Rhacophoridae

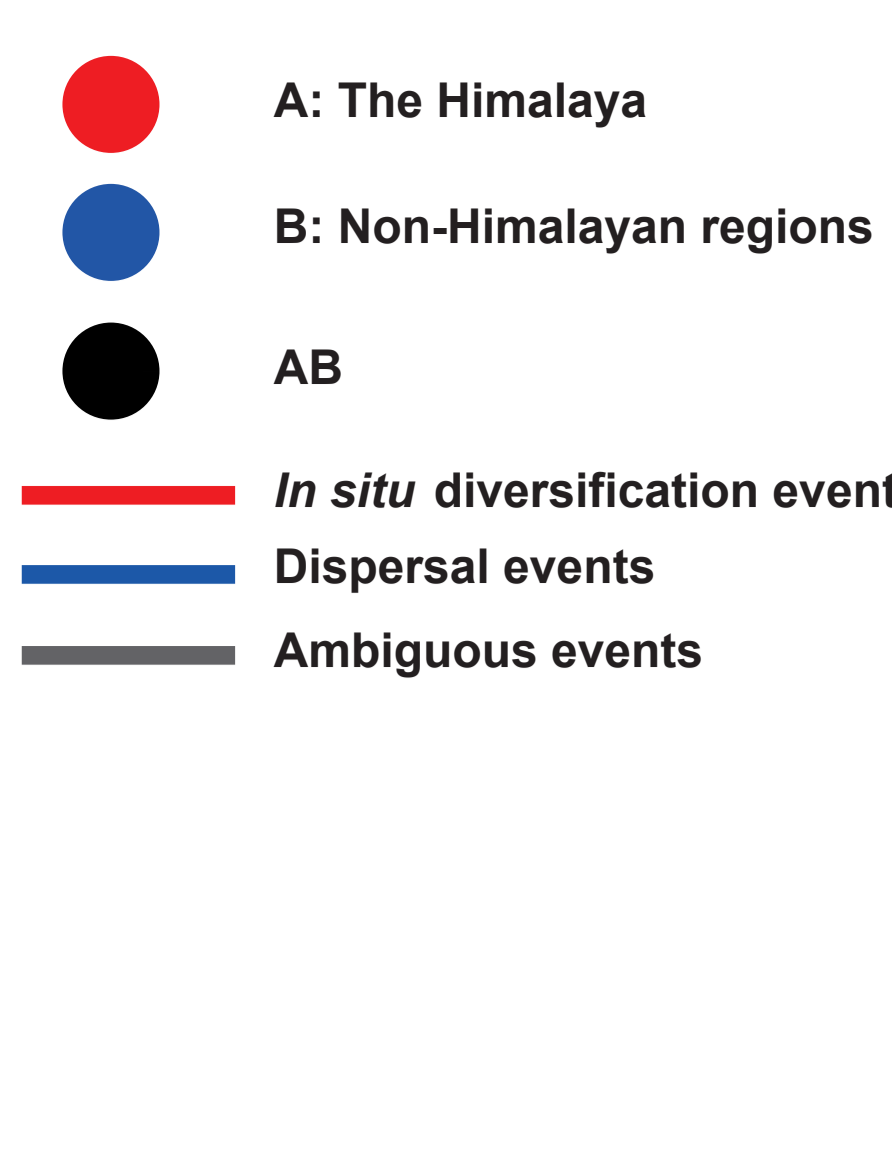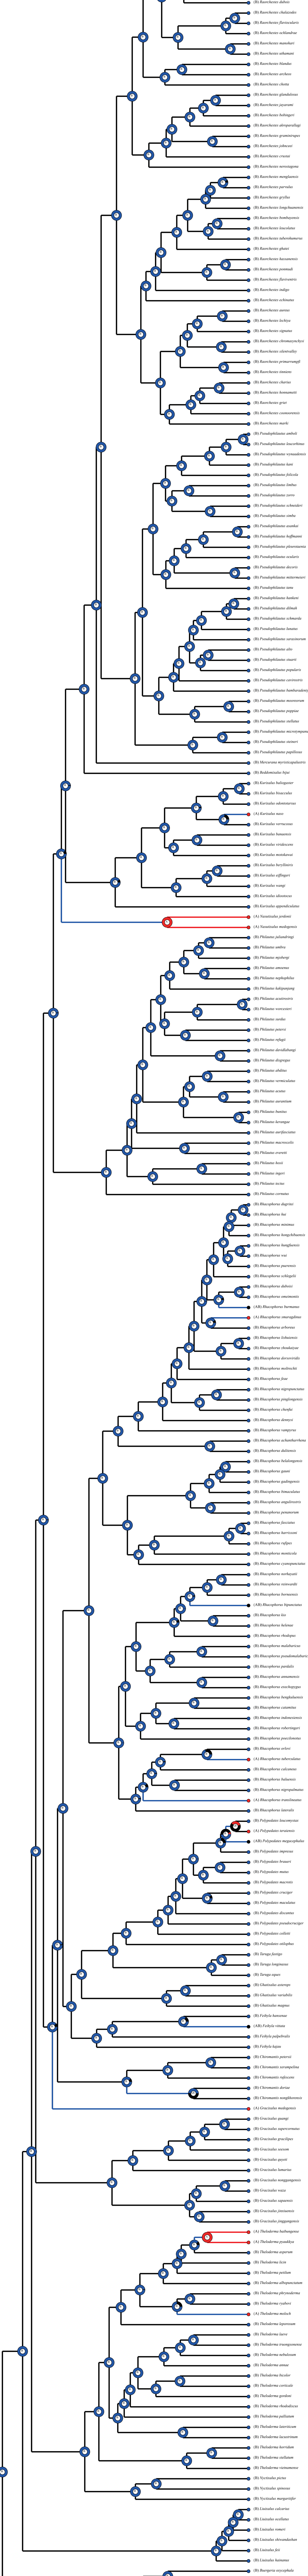

# Scinidae

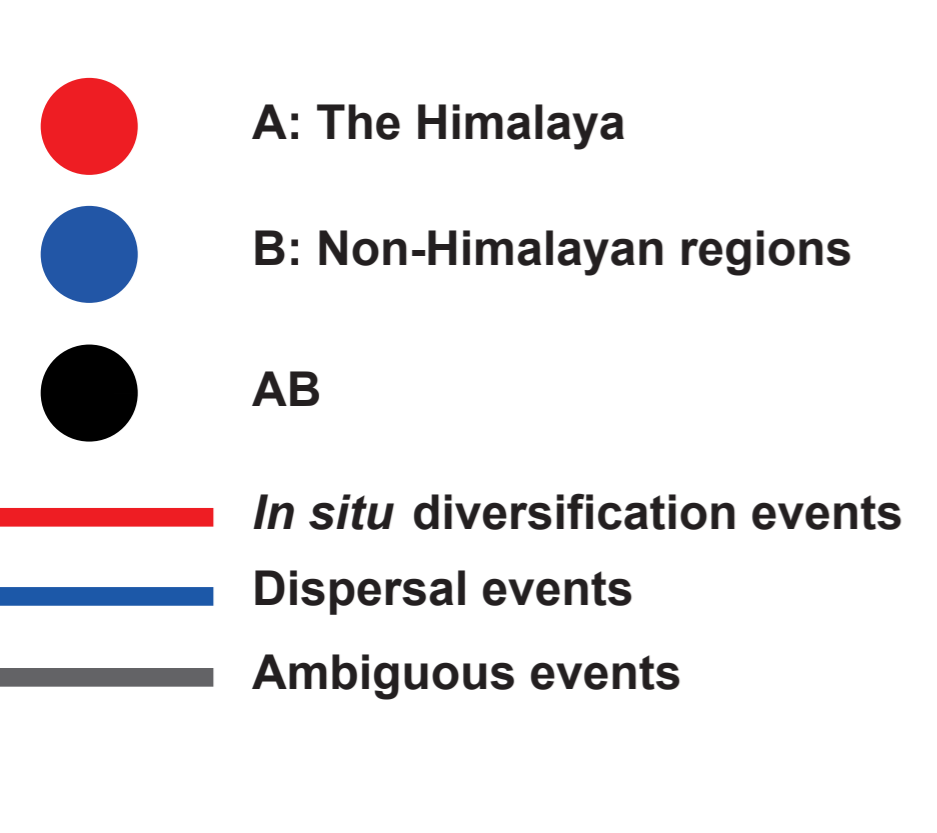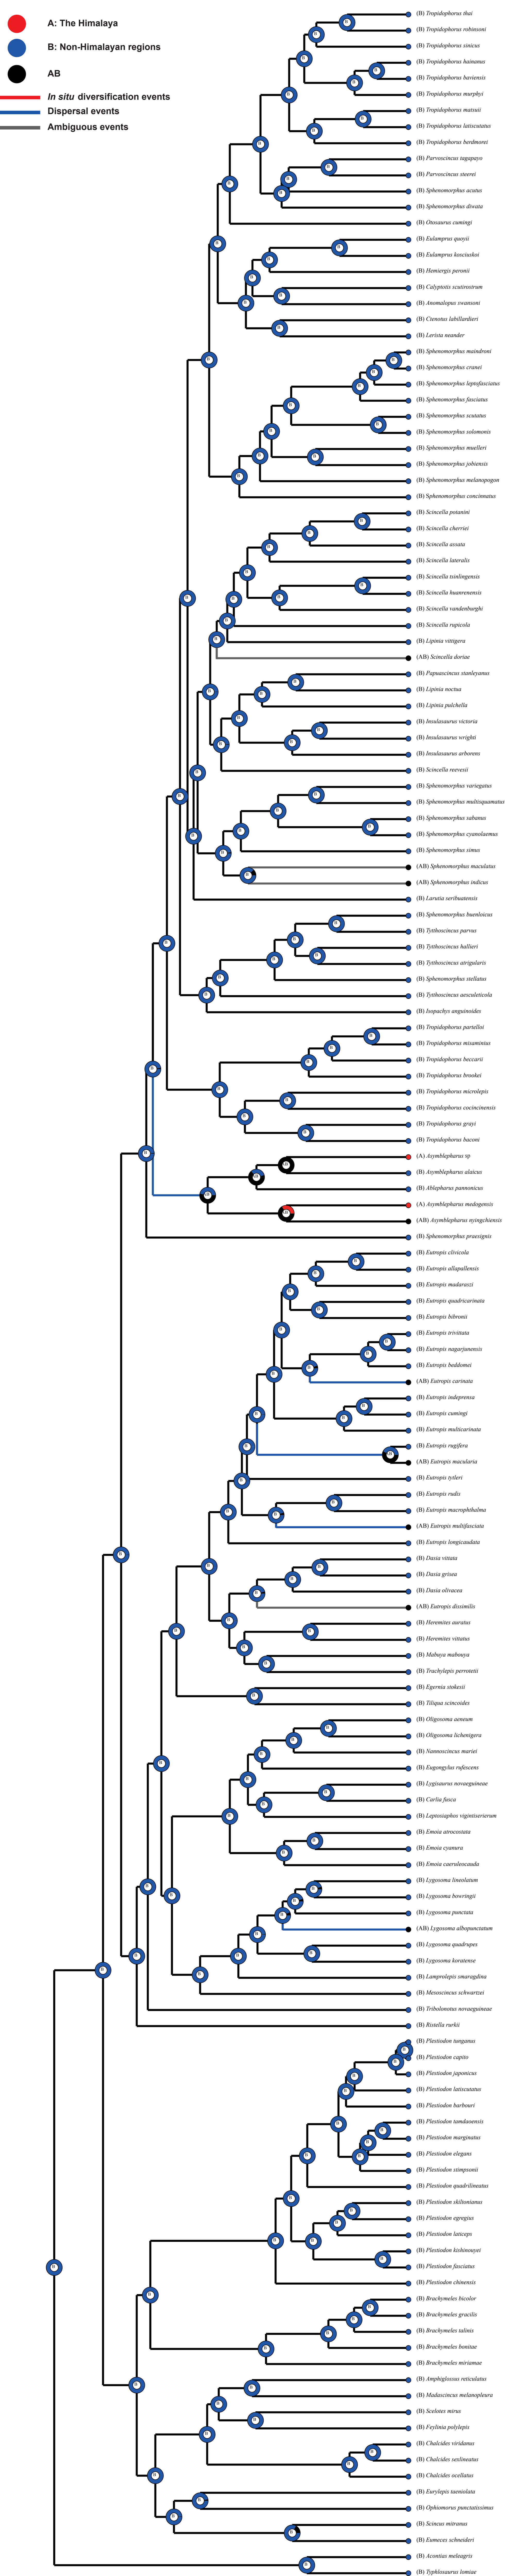

# Viperidae

● A: The Himalaya  
● B: Non-Himalayan regions  
● AB

— *In situ* diversification events  
— Dispersal events  
— Ambiguous events

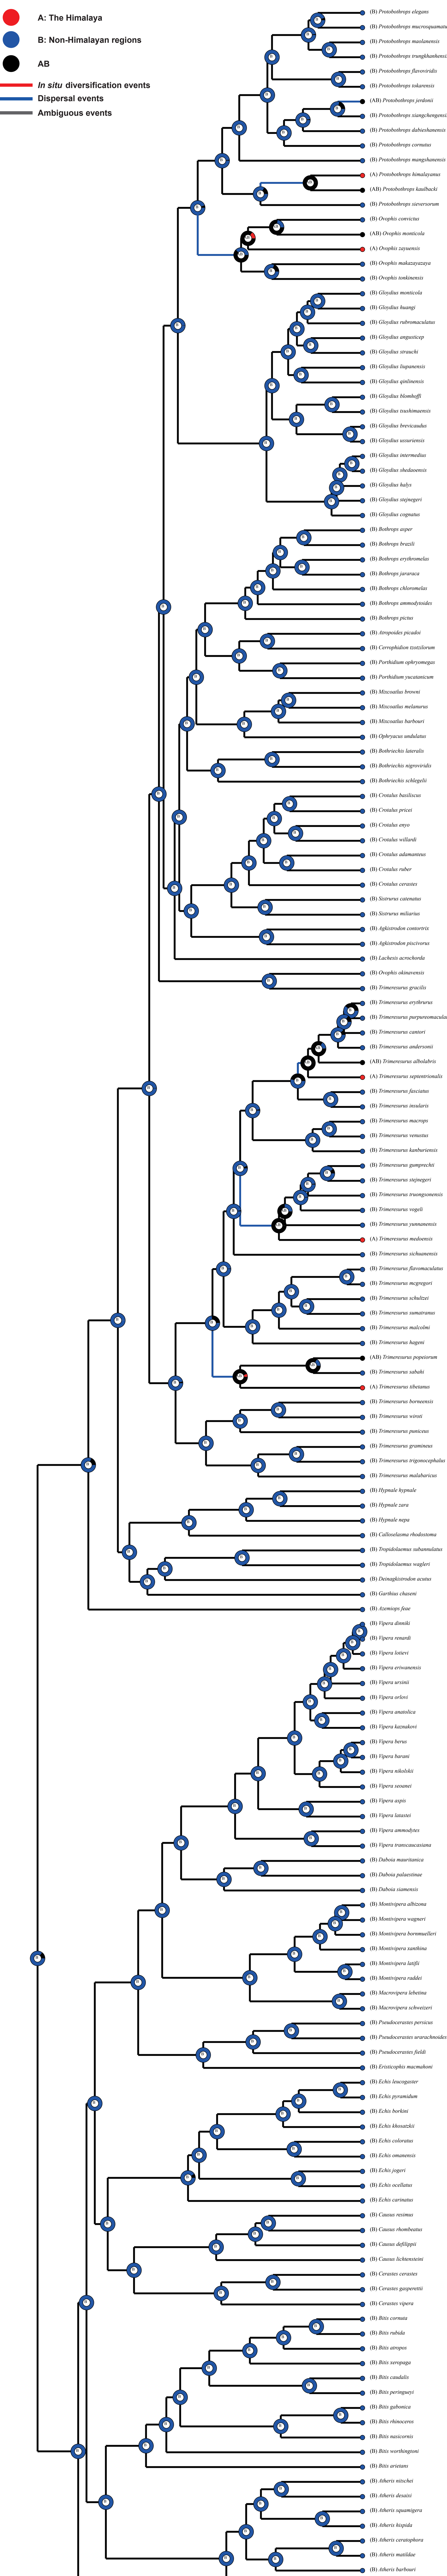

#### **Data S4.**

BioGeoBEARS analysis results based on nine regions. Trees with ancestral nodes reconstructed for specific biogeographic regions, indicated by the following letters and colors: Red (A): the Himalaya; red (B): Southeast Asia, including tropical regions of China, Malesia, and Papuasia; cyan (C): East Asia, the eastern boreal part of Russia and temperate regions of East Asia, including Japan and Taiwan; dark green (D): South Asia, south of the Himalaya, including Sri Lanka; purple (E): Central–West Asia, including the Pakistan, Uzbekistan, Tajikistan, The Arabia Peninsula countries); orange (F): Australia (and New Zealand); gray (G): Europe. light green (H): Africa; blue (I): America (north and south America); black: combined regions (the Himalaya and other regions like AB); white: other regions (etc., BCD). Red branches represent “dispersal into the Himalaya” events, black branches were not related to Himalayan diversification.

# Agamidae

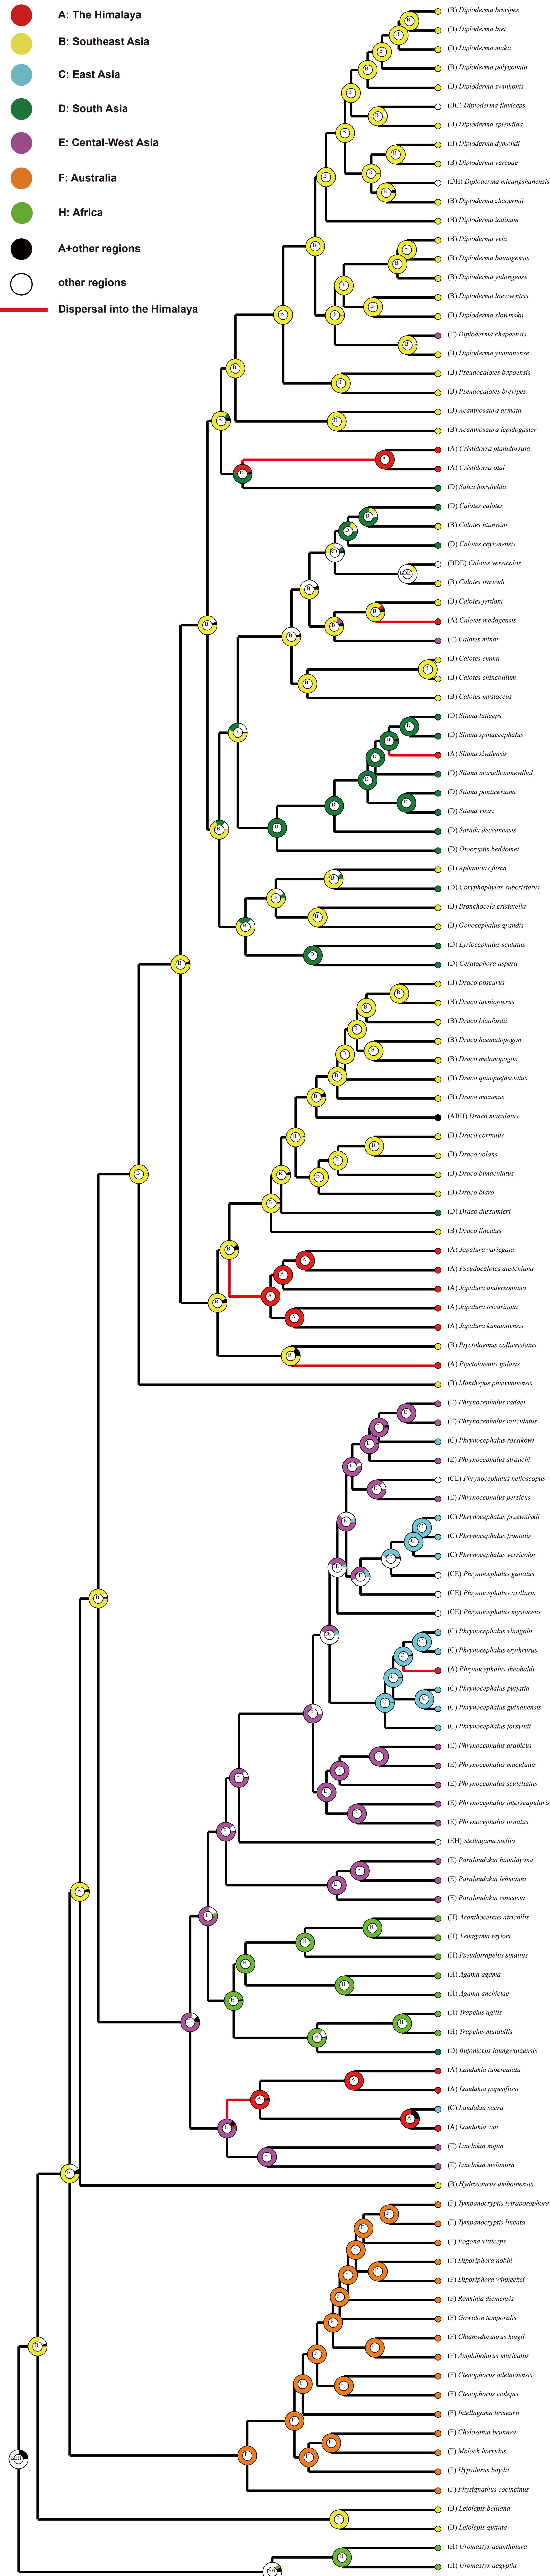



# Anguidae

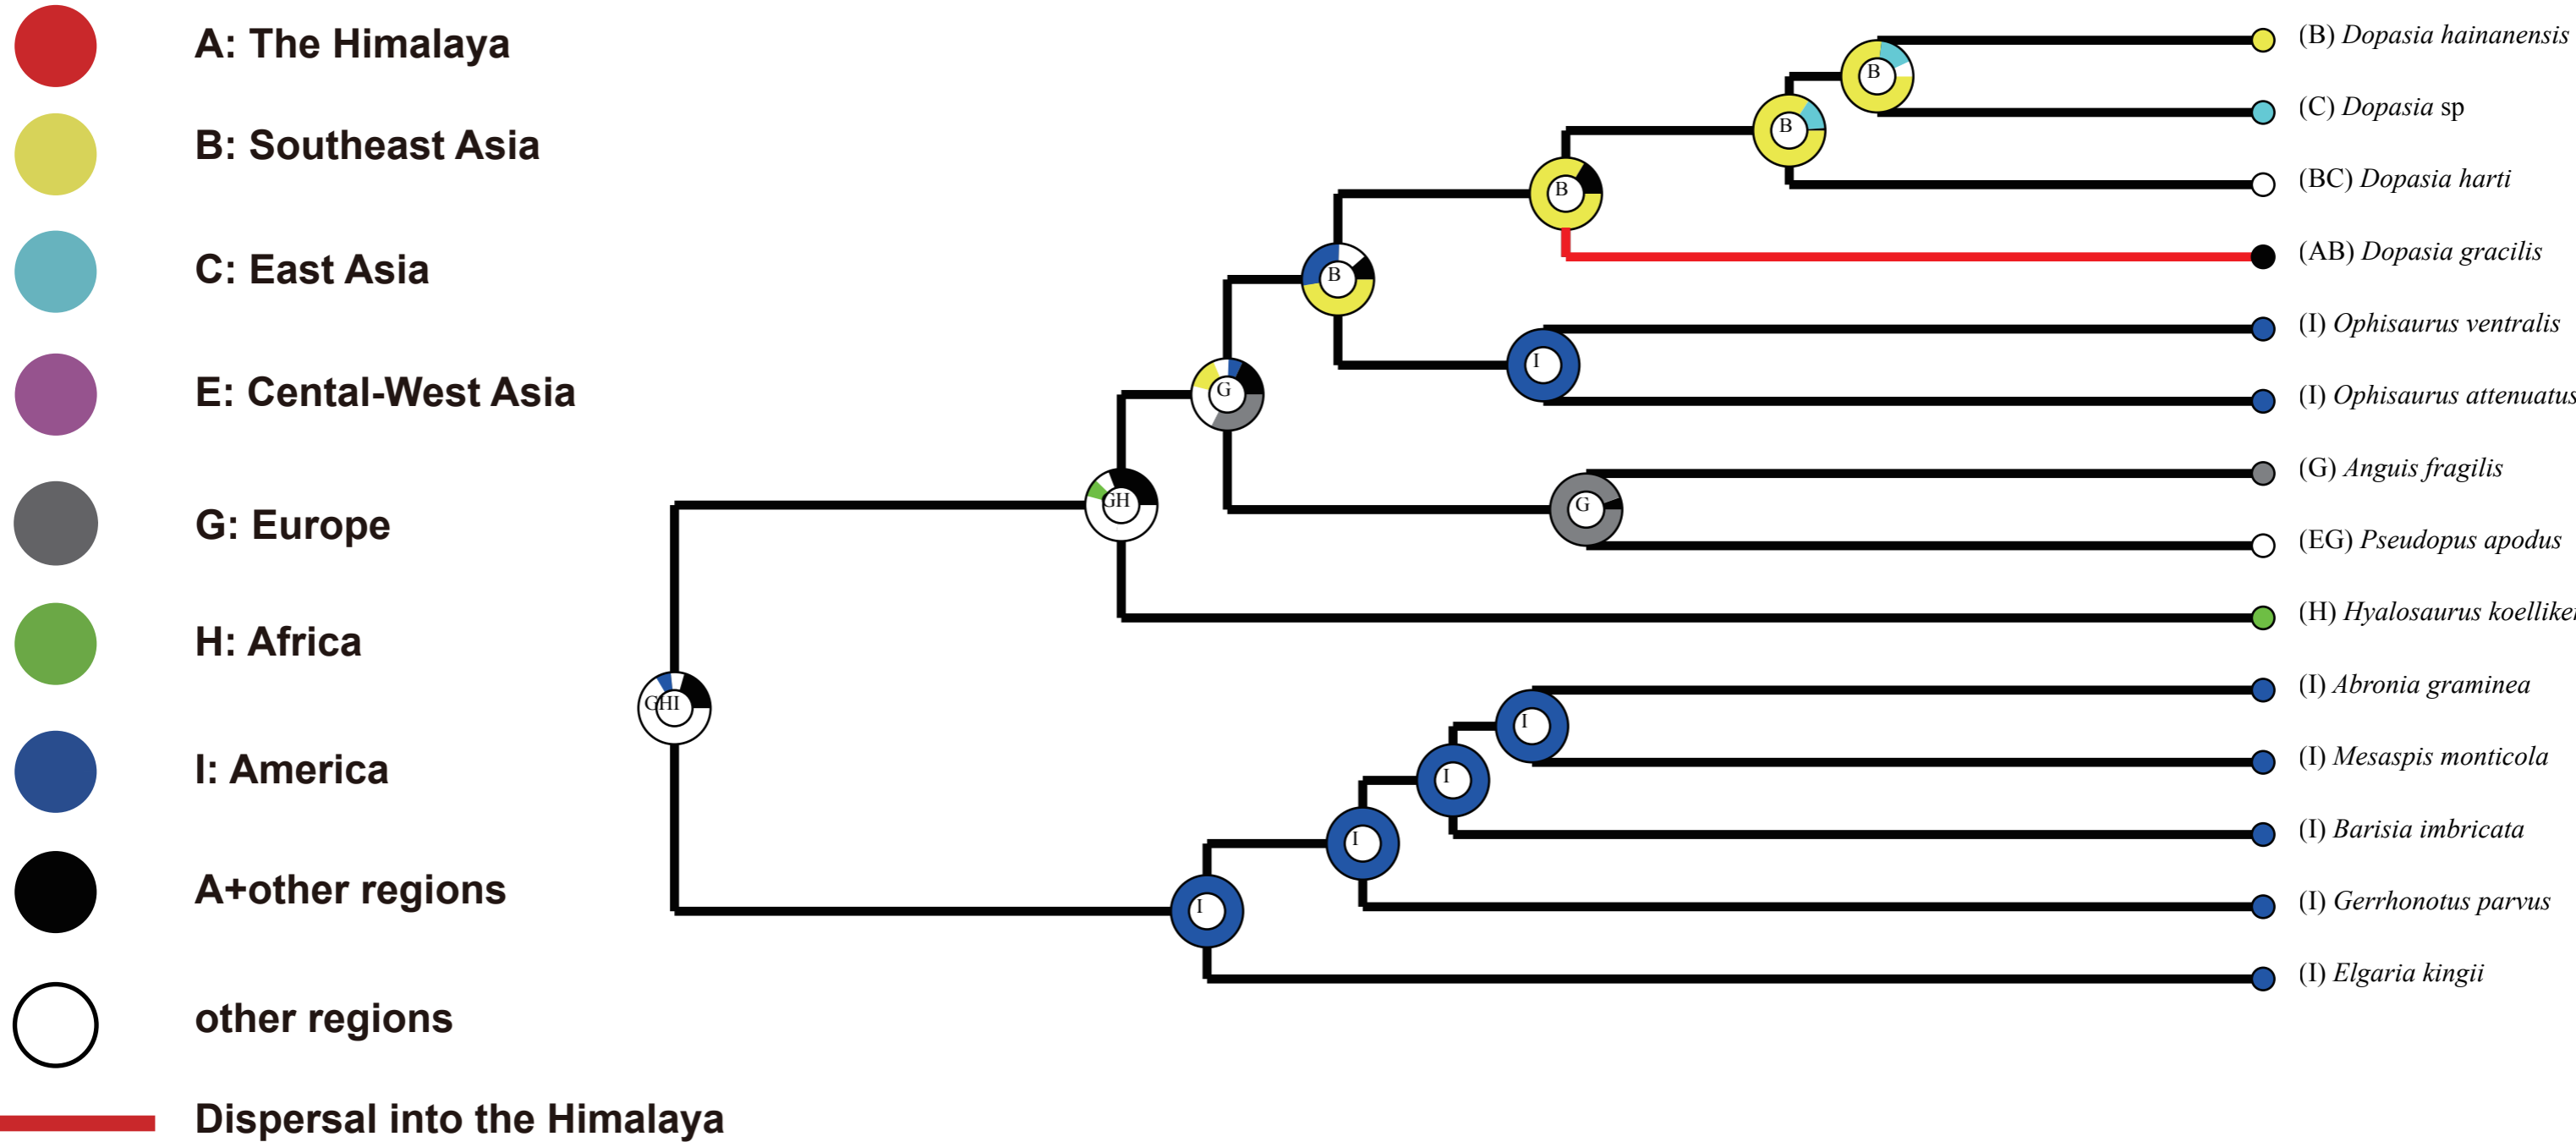

# Bufonidae

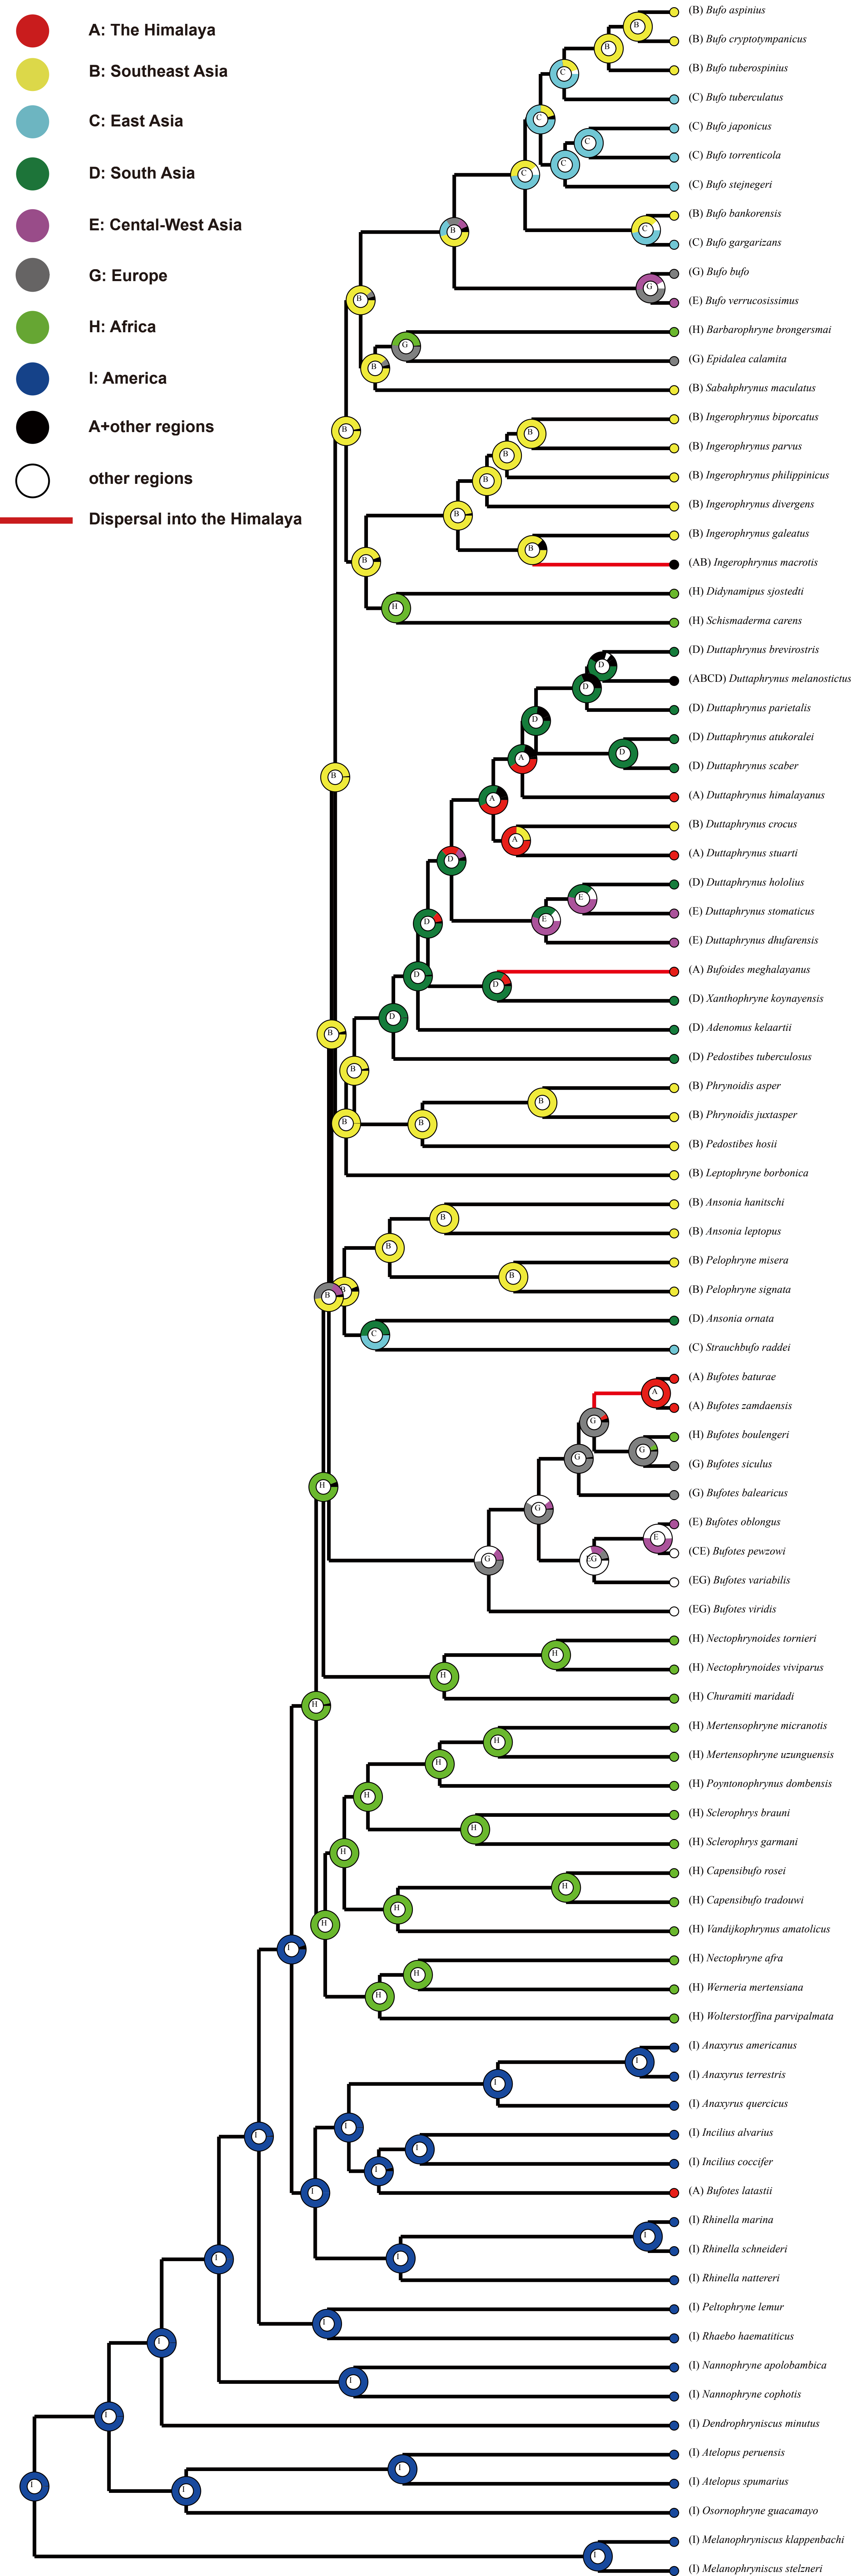

# Ceratobatrachidae

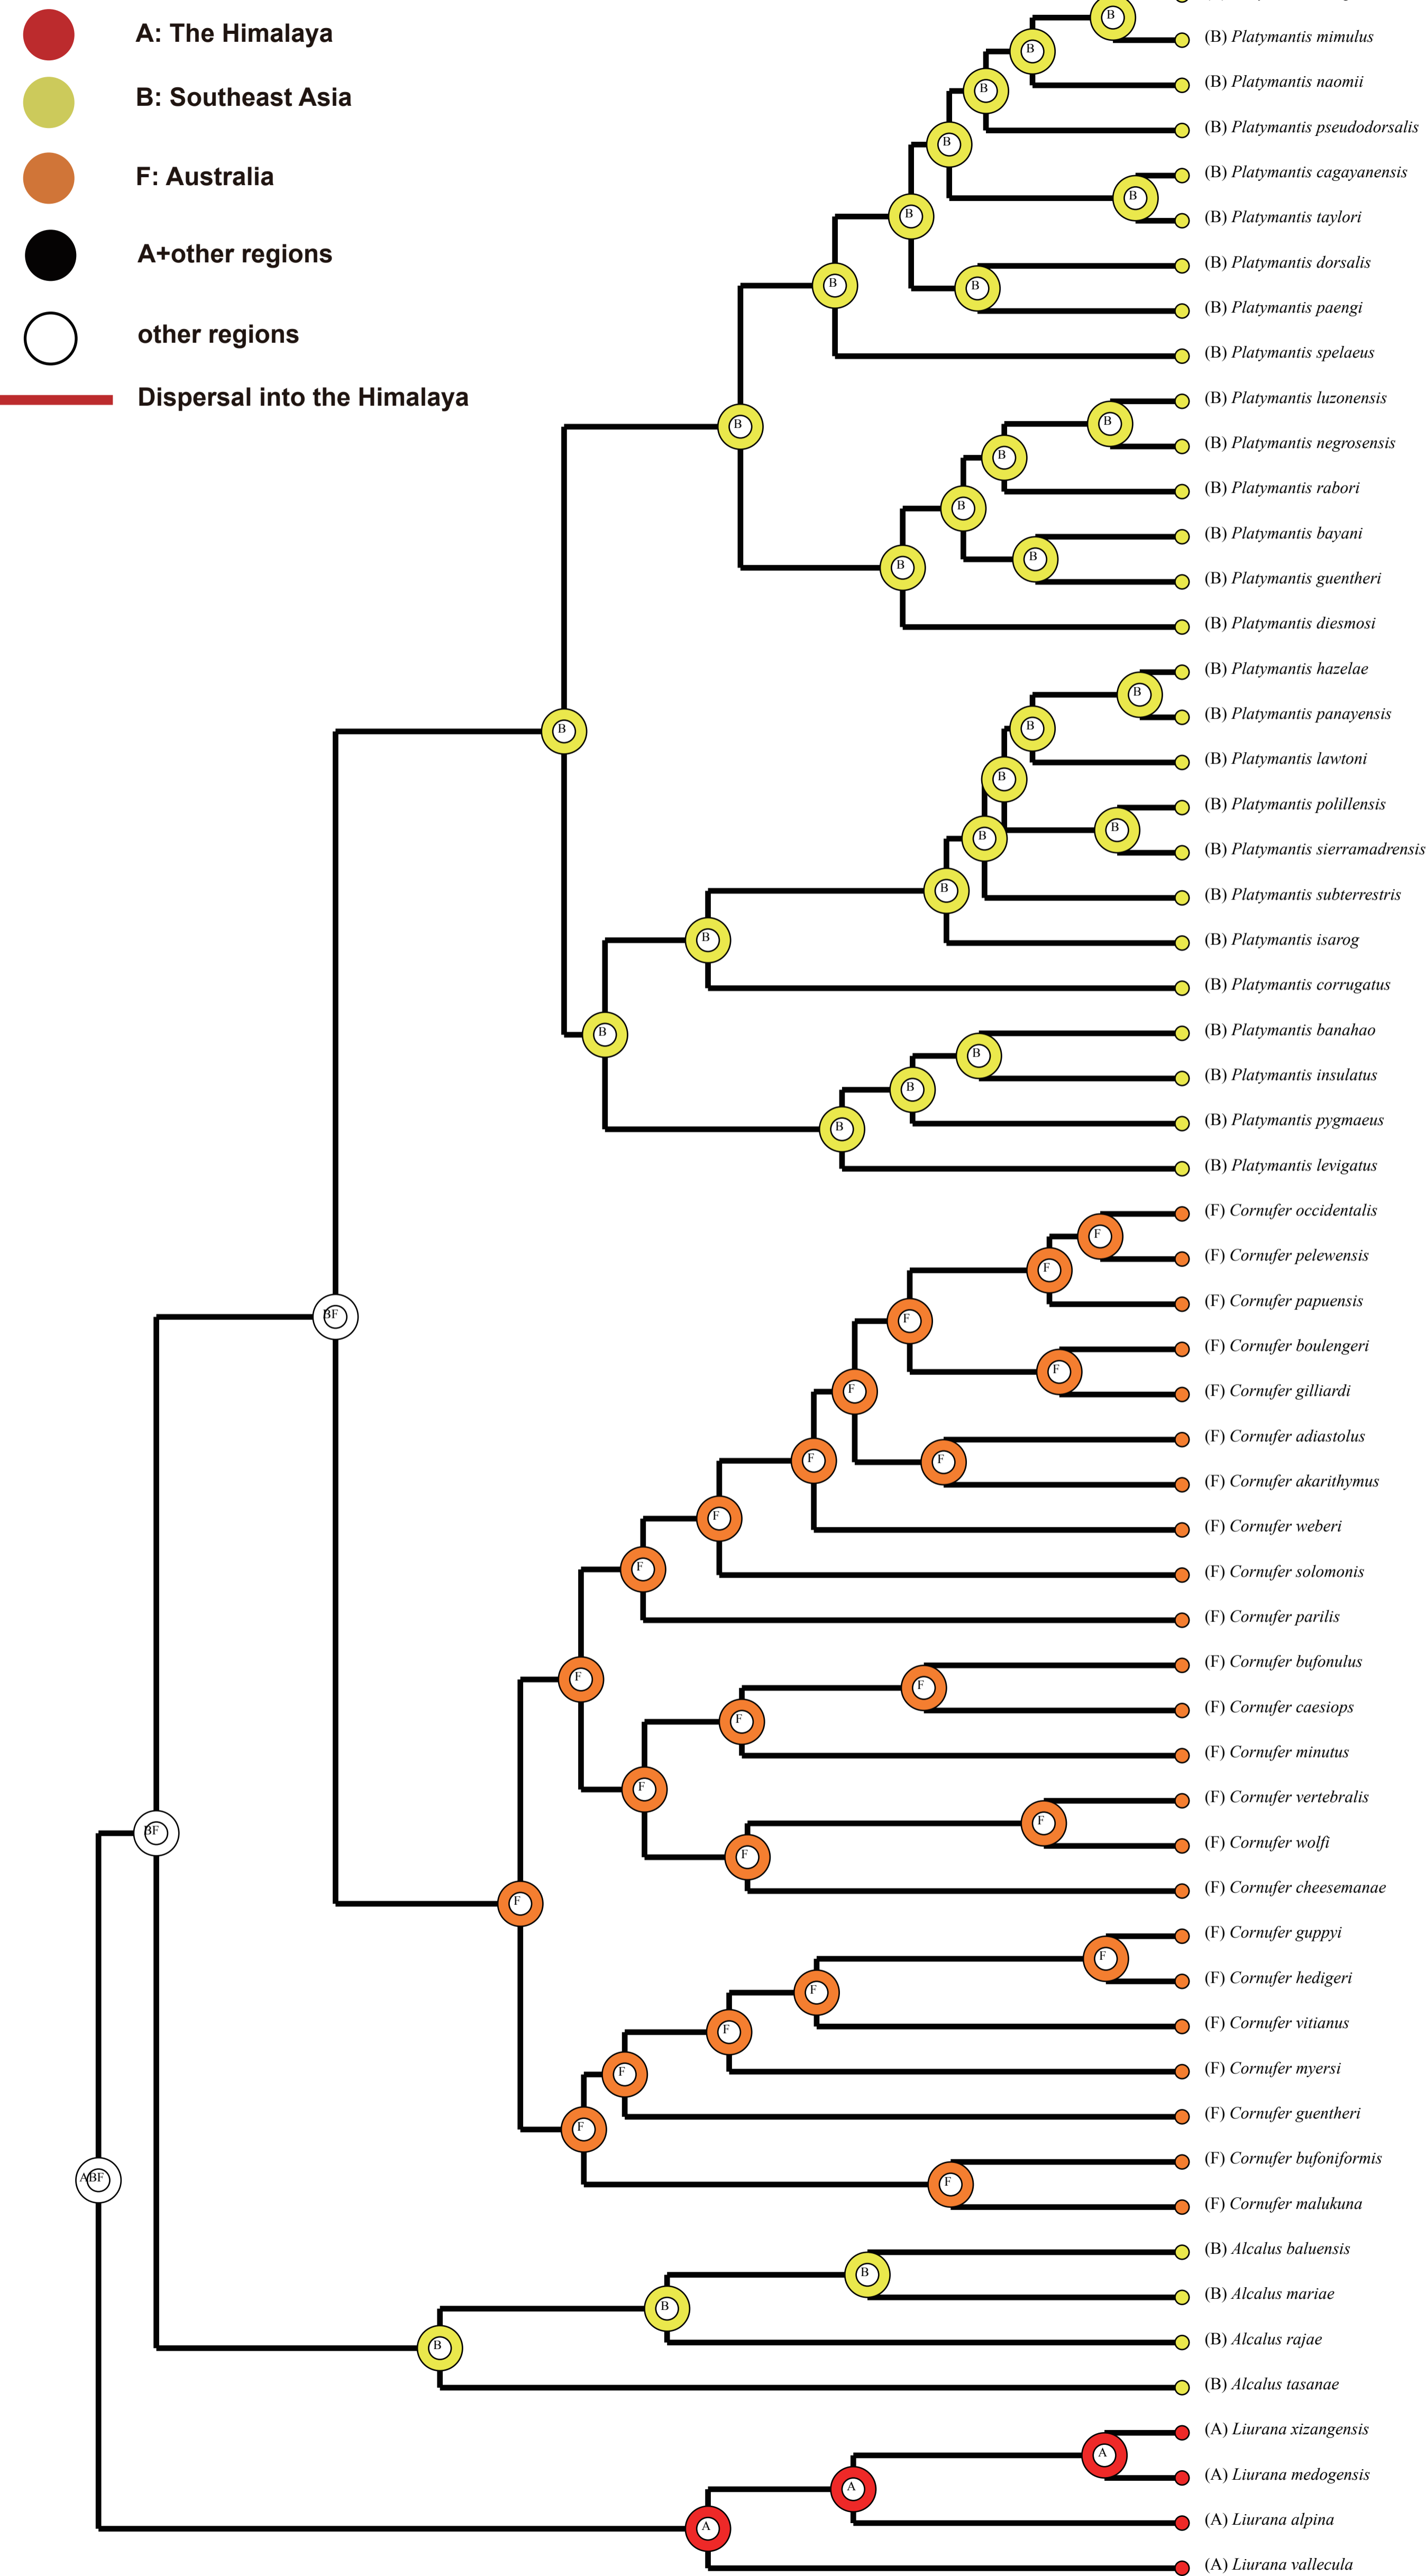

# Colubridae

- **A: The Himalaya**
- **B: Southeast Asia**
- **C: East Asia**
- **D: South Asia**
- **E: Cental-West Asia**
- **G: Europe**
- **I: America**
- **A+other regions**
- other regions**
- **Dispersal into the Himalaya**

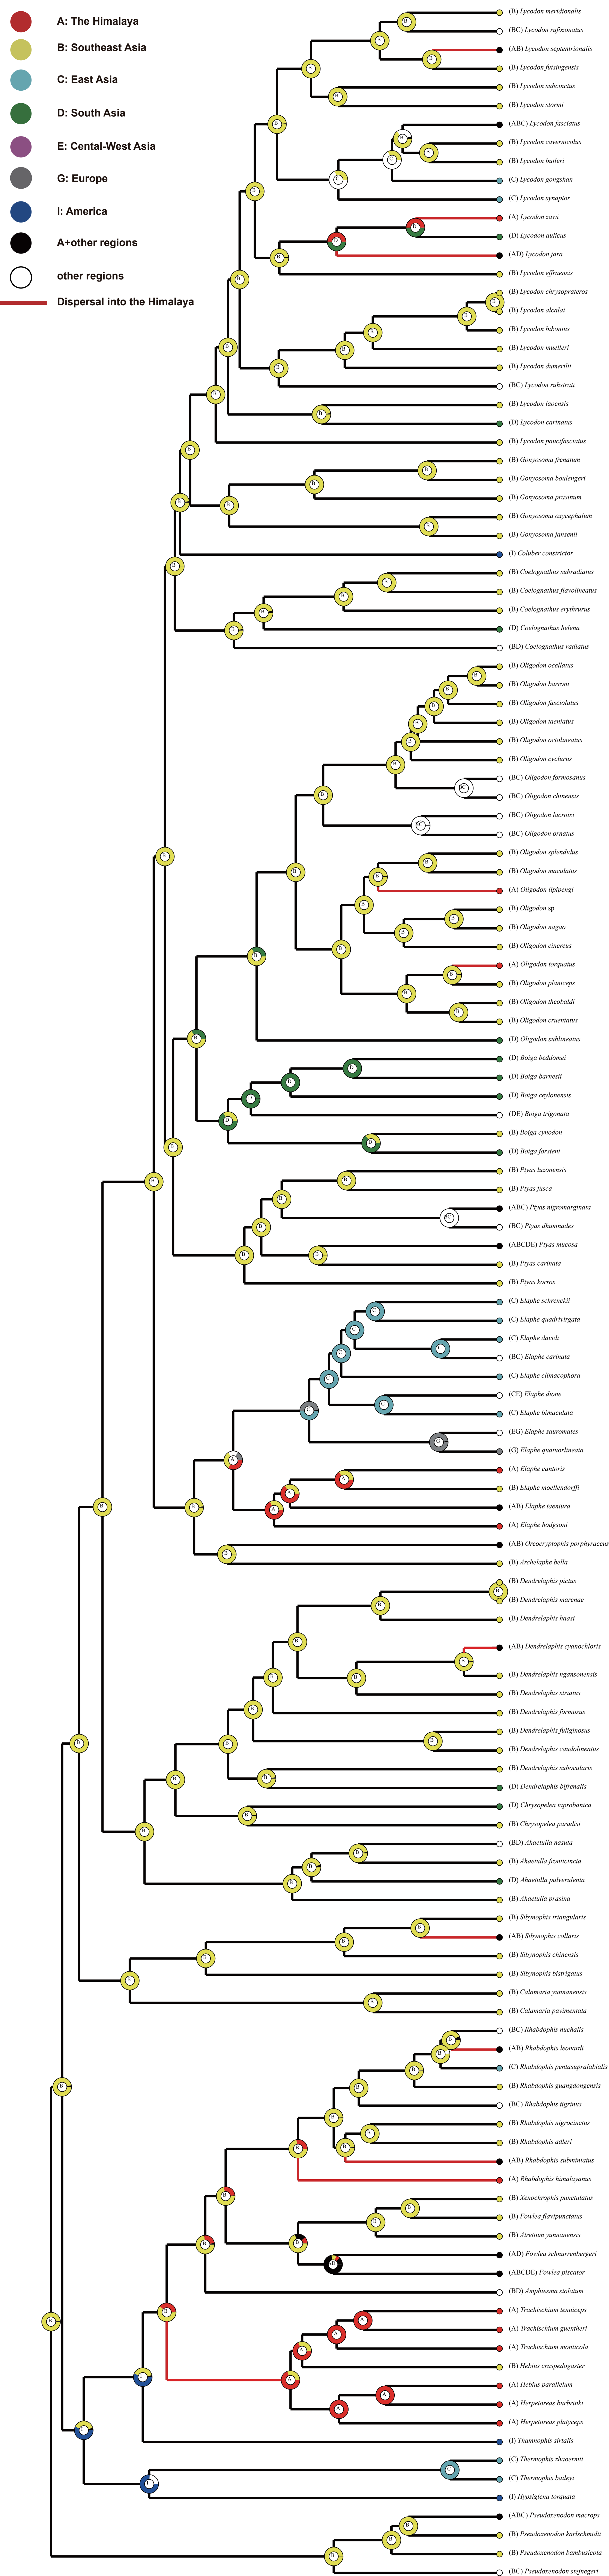

# Dicroglossidae

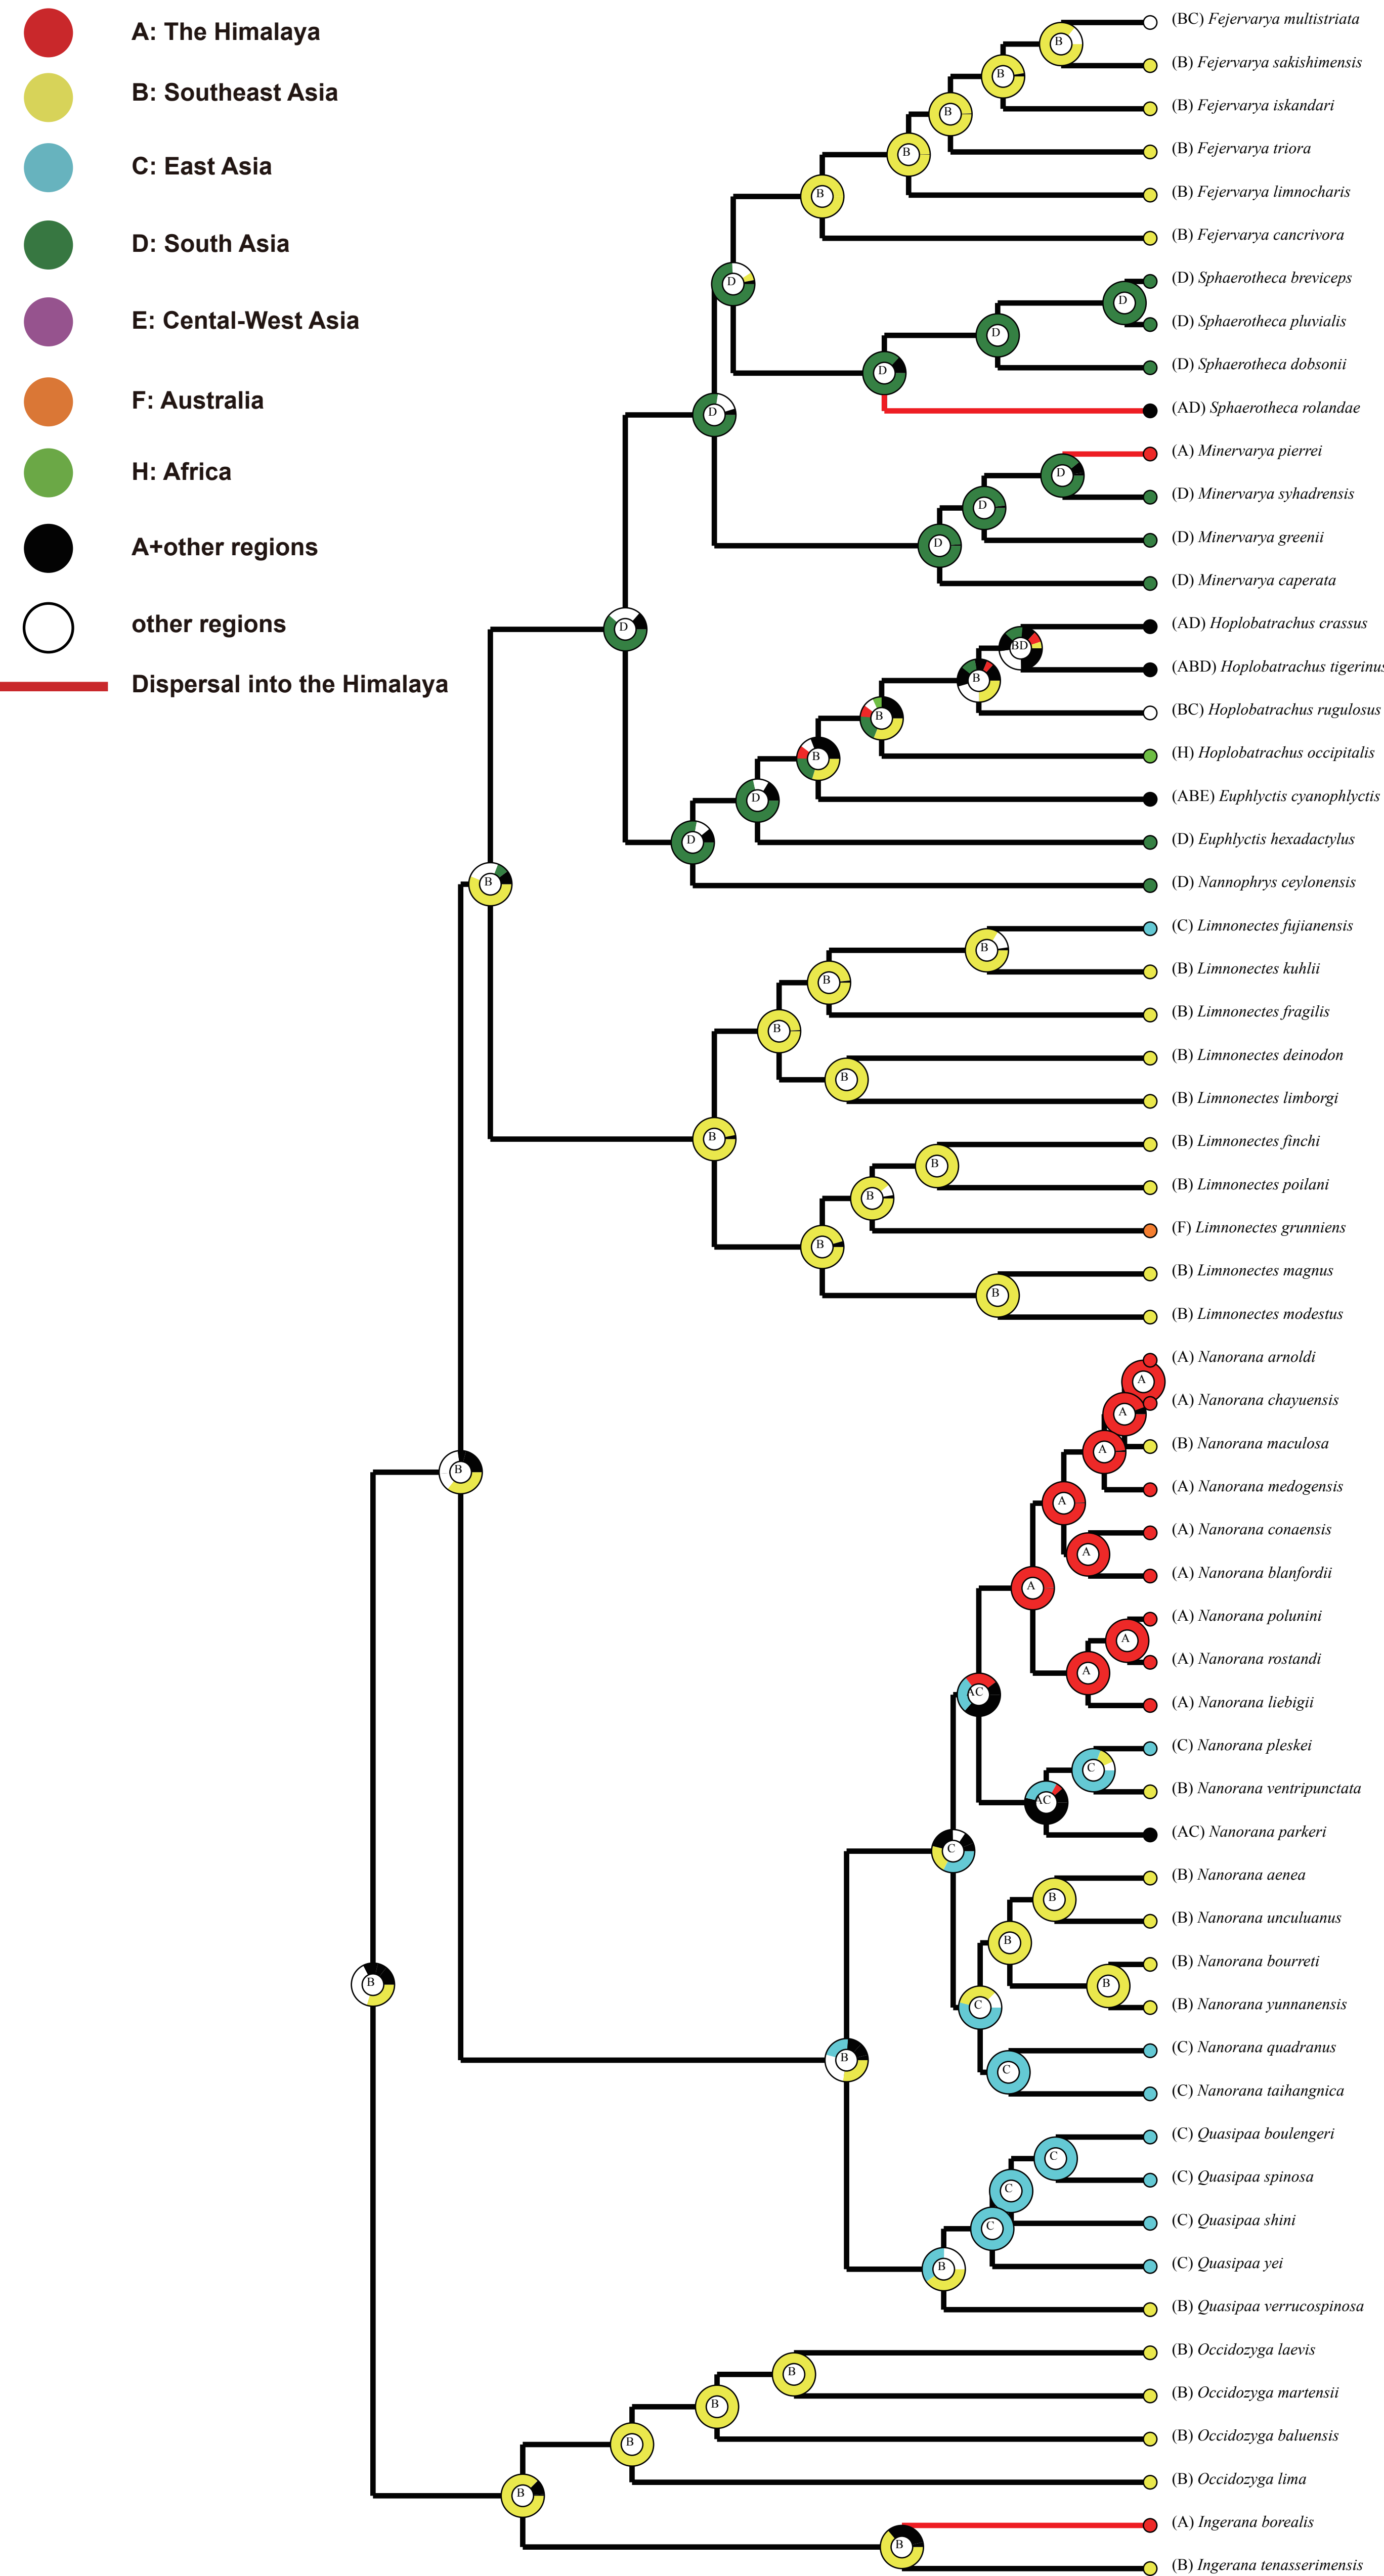

# Elapidae

- **A: The Himalaya**
- **B: Southeast Asia**
- **C: East Asia**
- **D: South Asia**
- **E: Cental-West Asia**
- **F: Australia**
- **H: Africa**
- **I: America**
- **A+other regions**
- other regions**
- **Dispersal into the Himalaya**

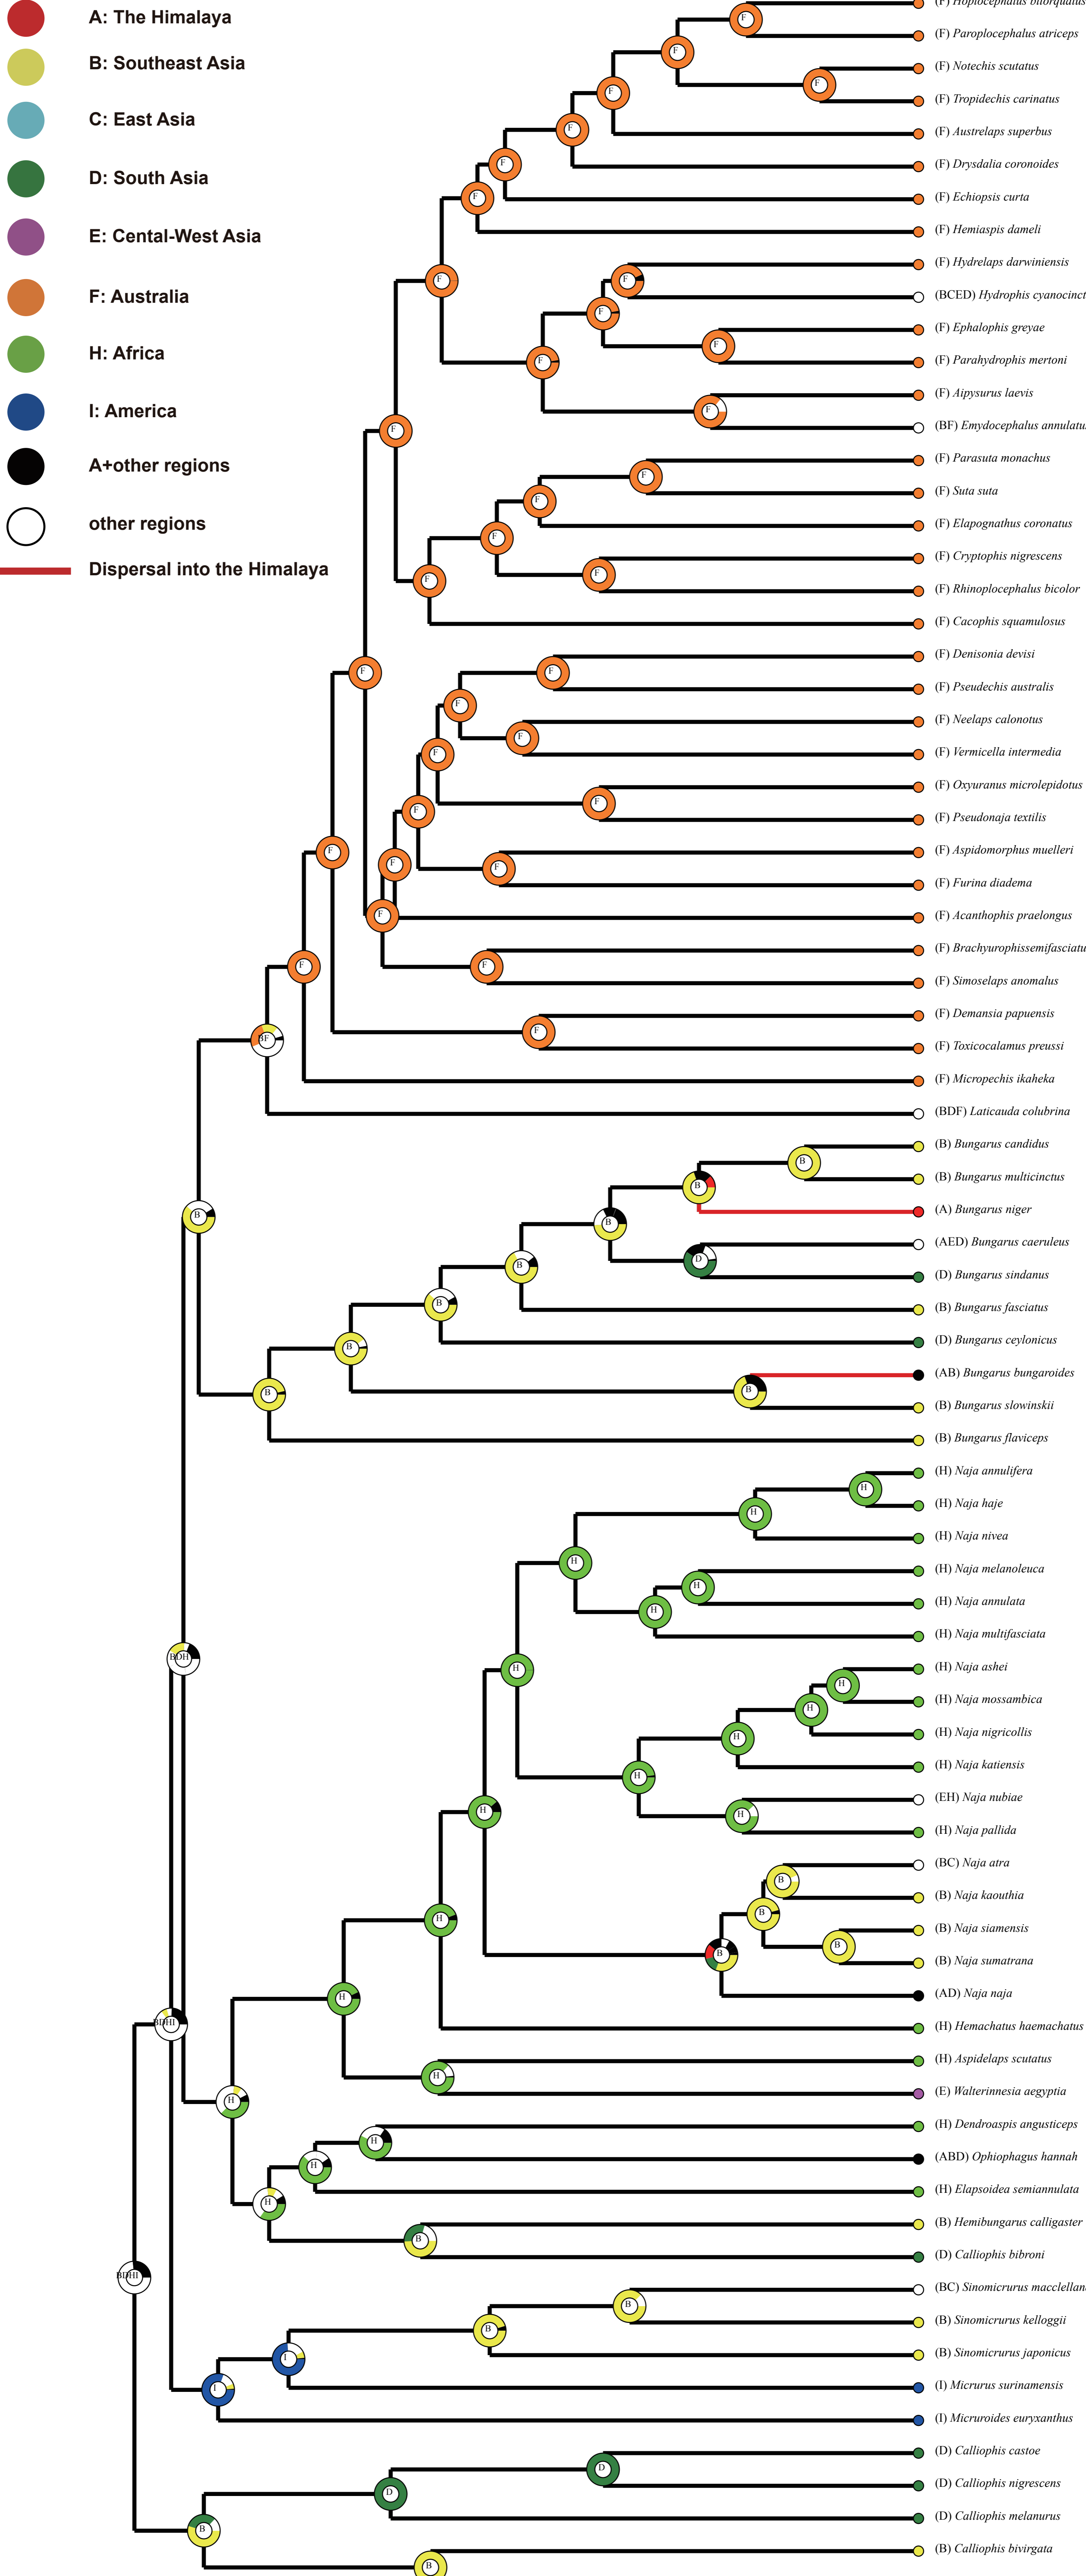

# Gekkonidae

- **A: The Himalaya**
- **B: Southeast Asia**
- **C: East Asia**
- **D: South Asia**
- **E: Cental-West Asia**
- **F: Australia**
- **H: Africa**
- **I: America**
- **A+other regions**
- other regions**
- Dispersal into the Himalaya**

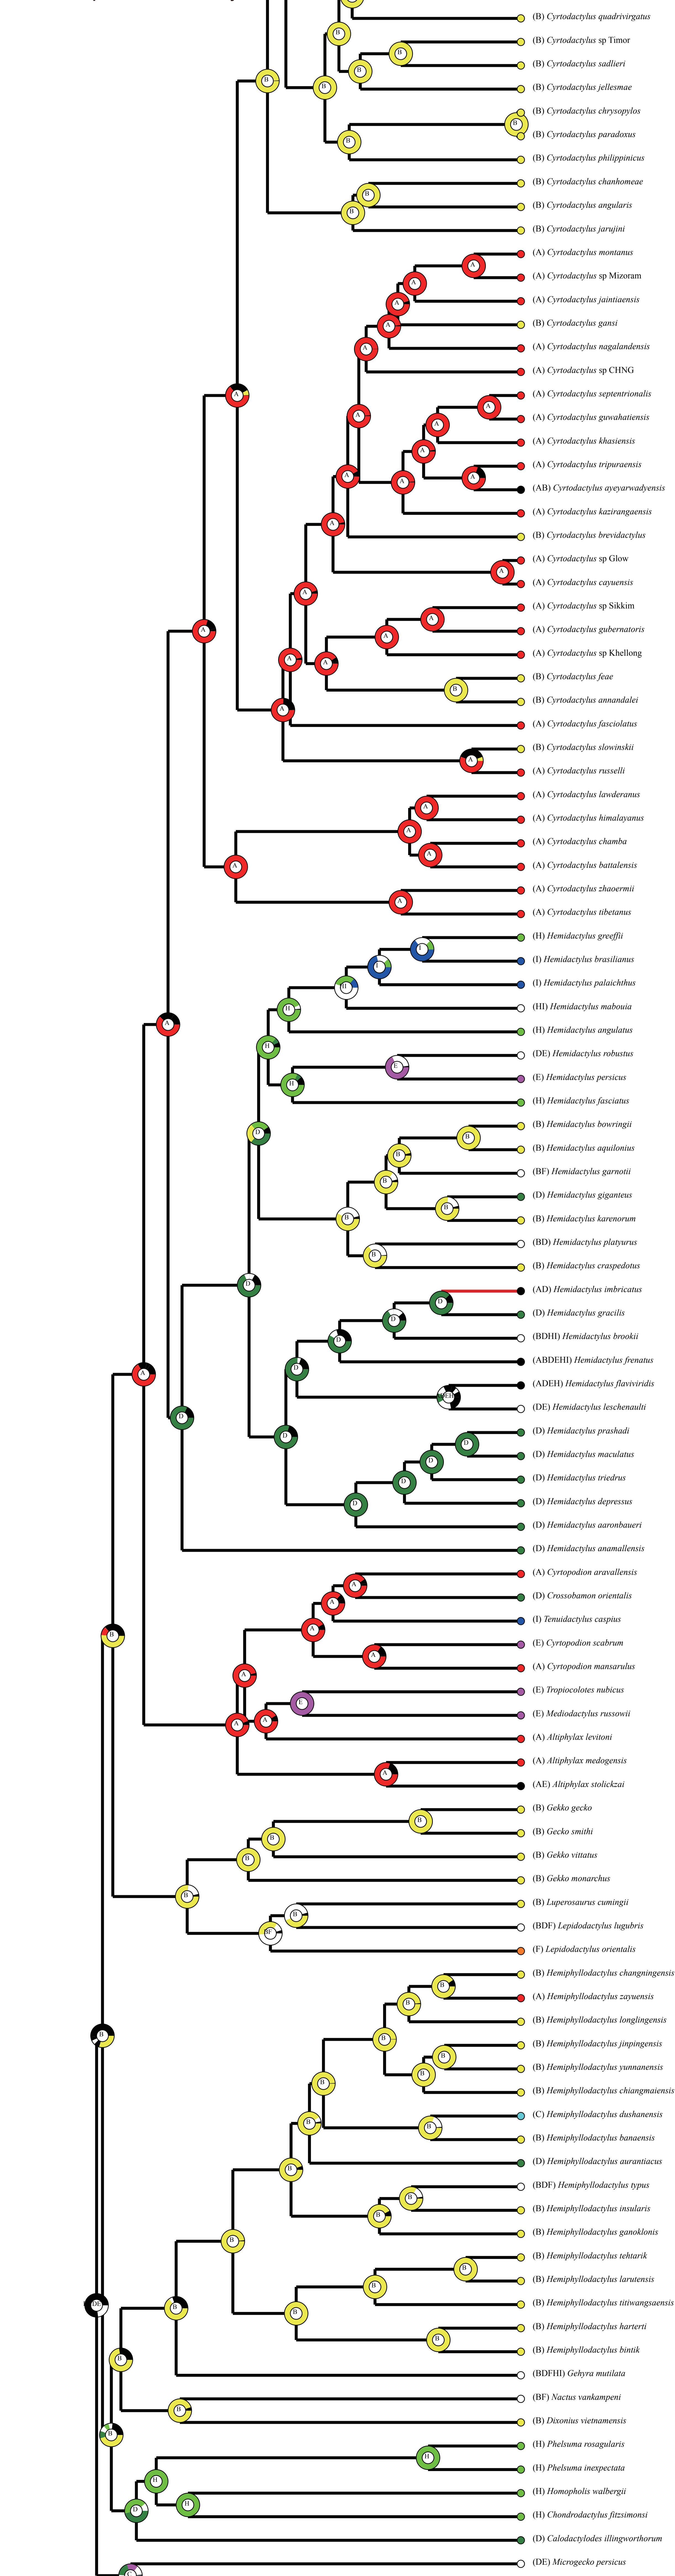

# Megophryidae

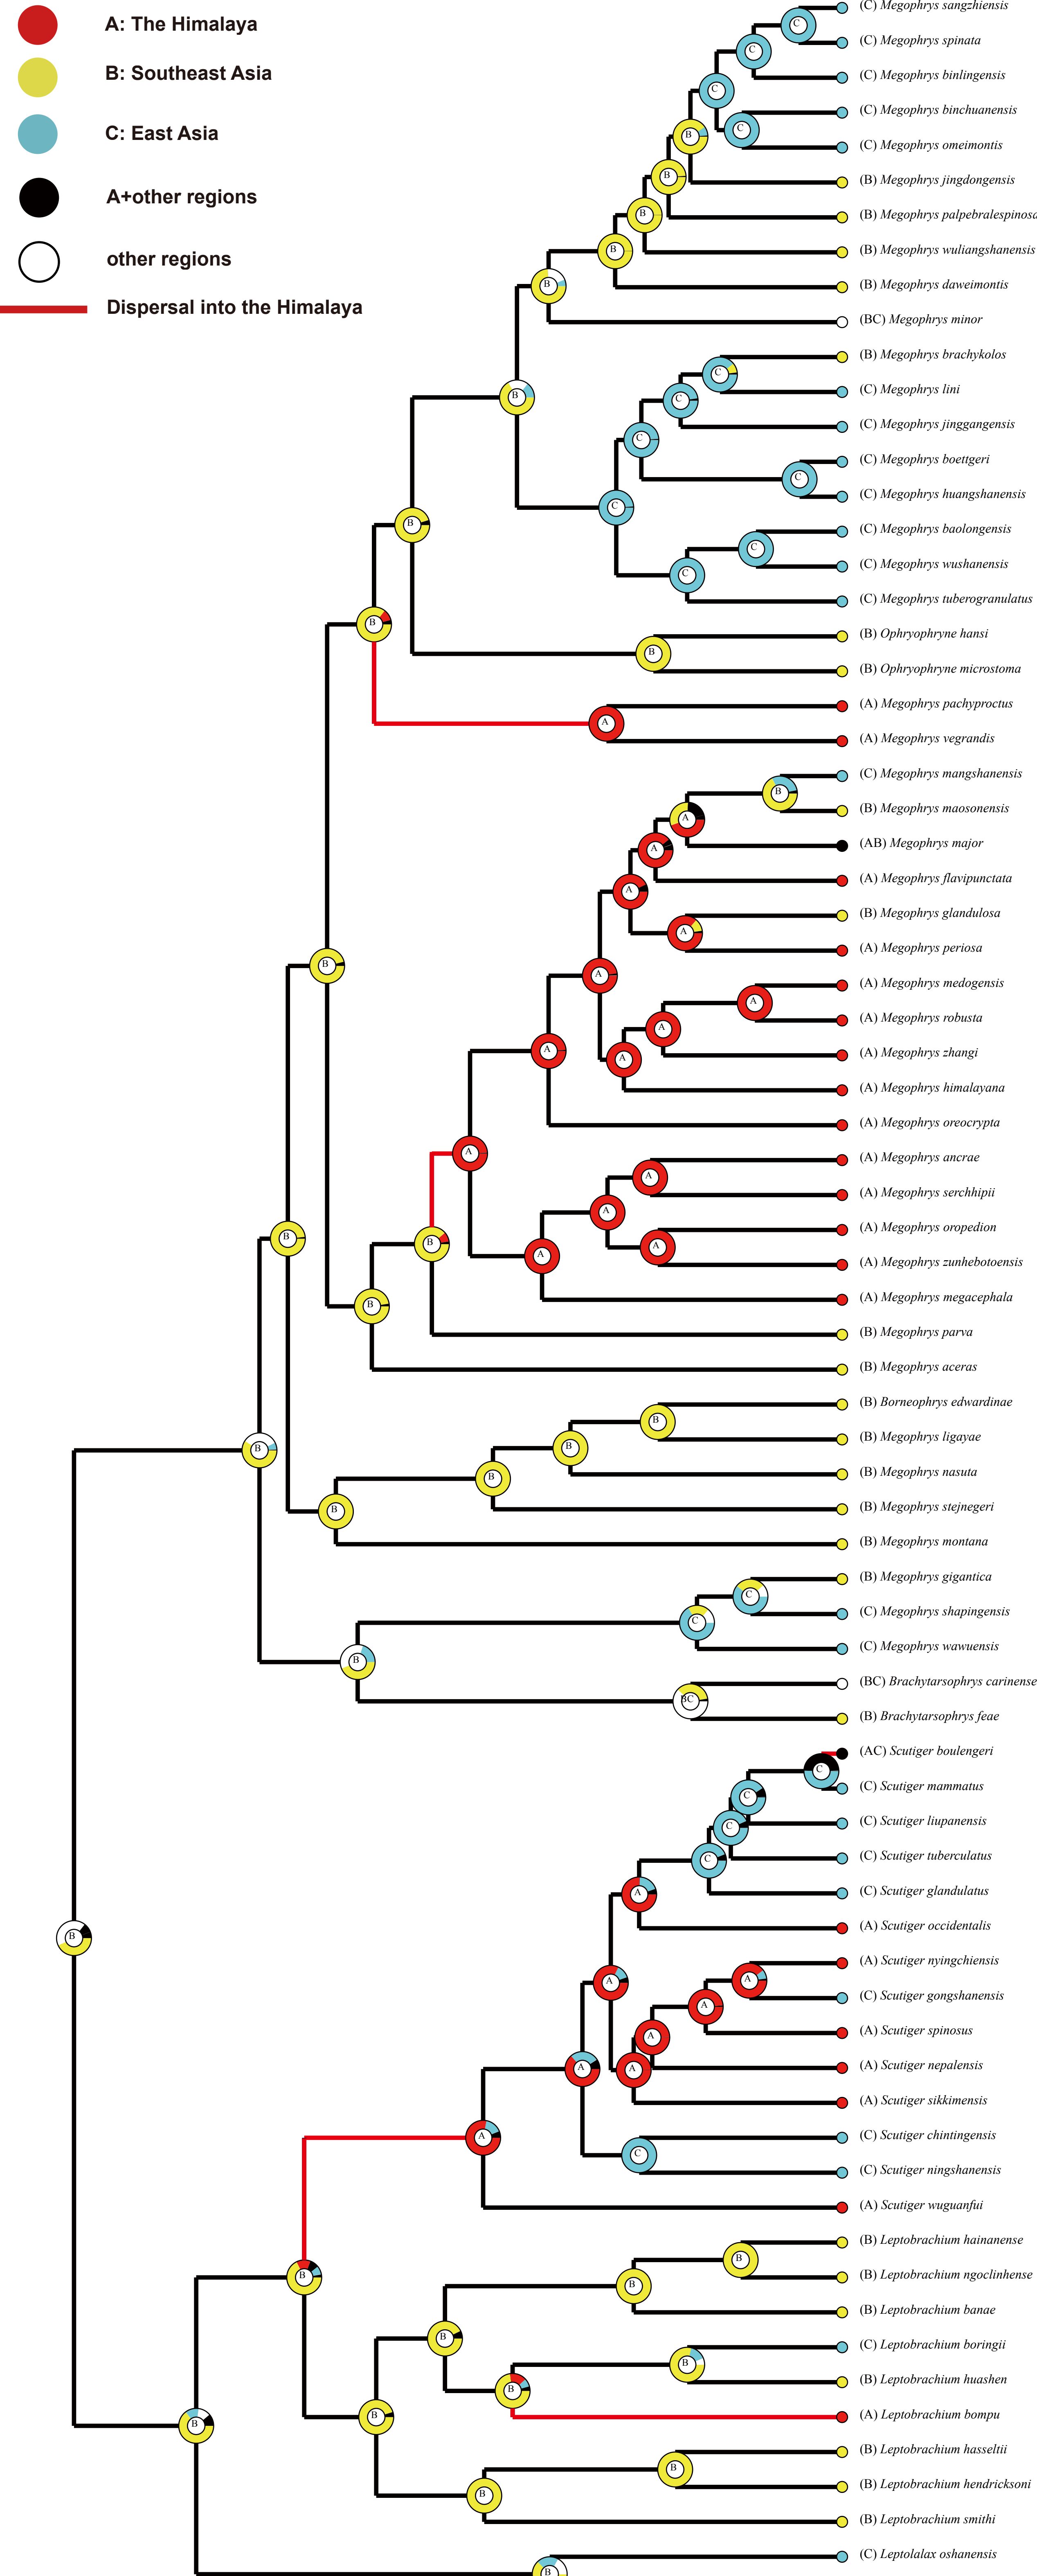



# Pareidae

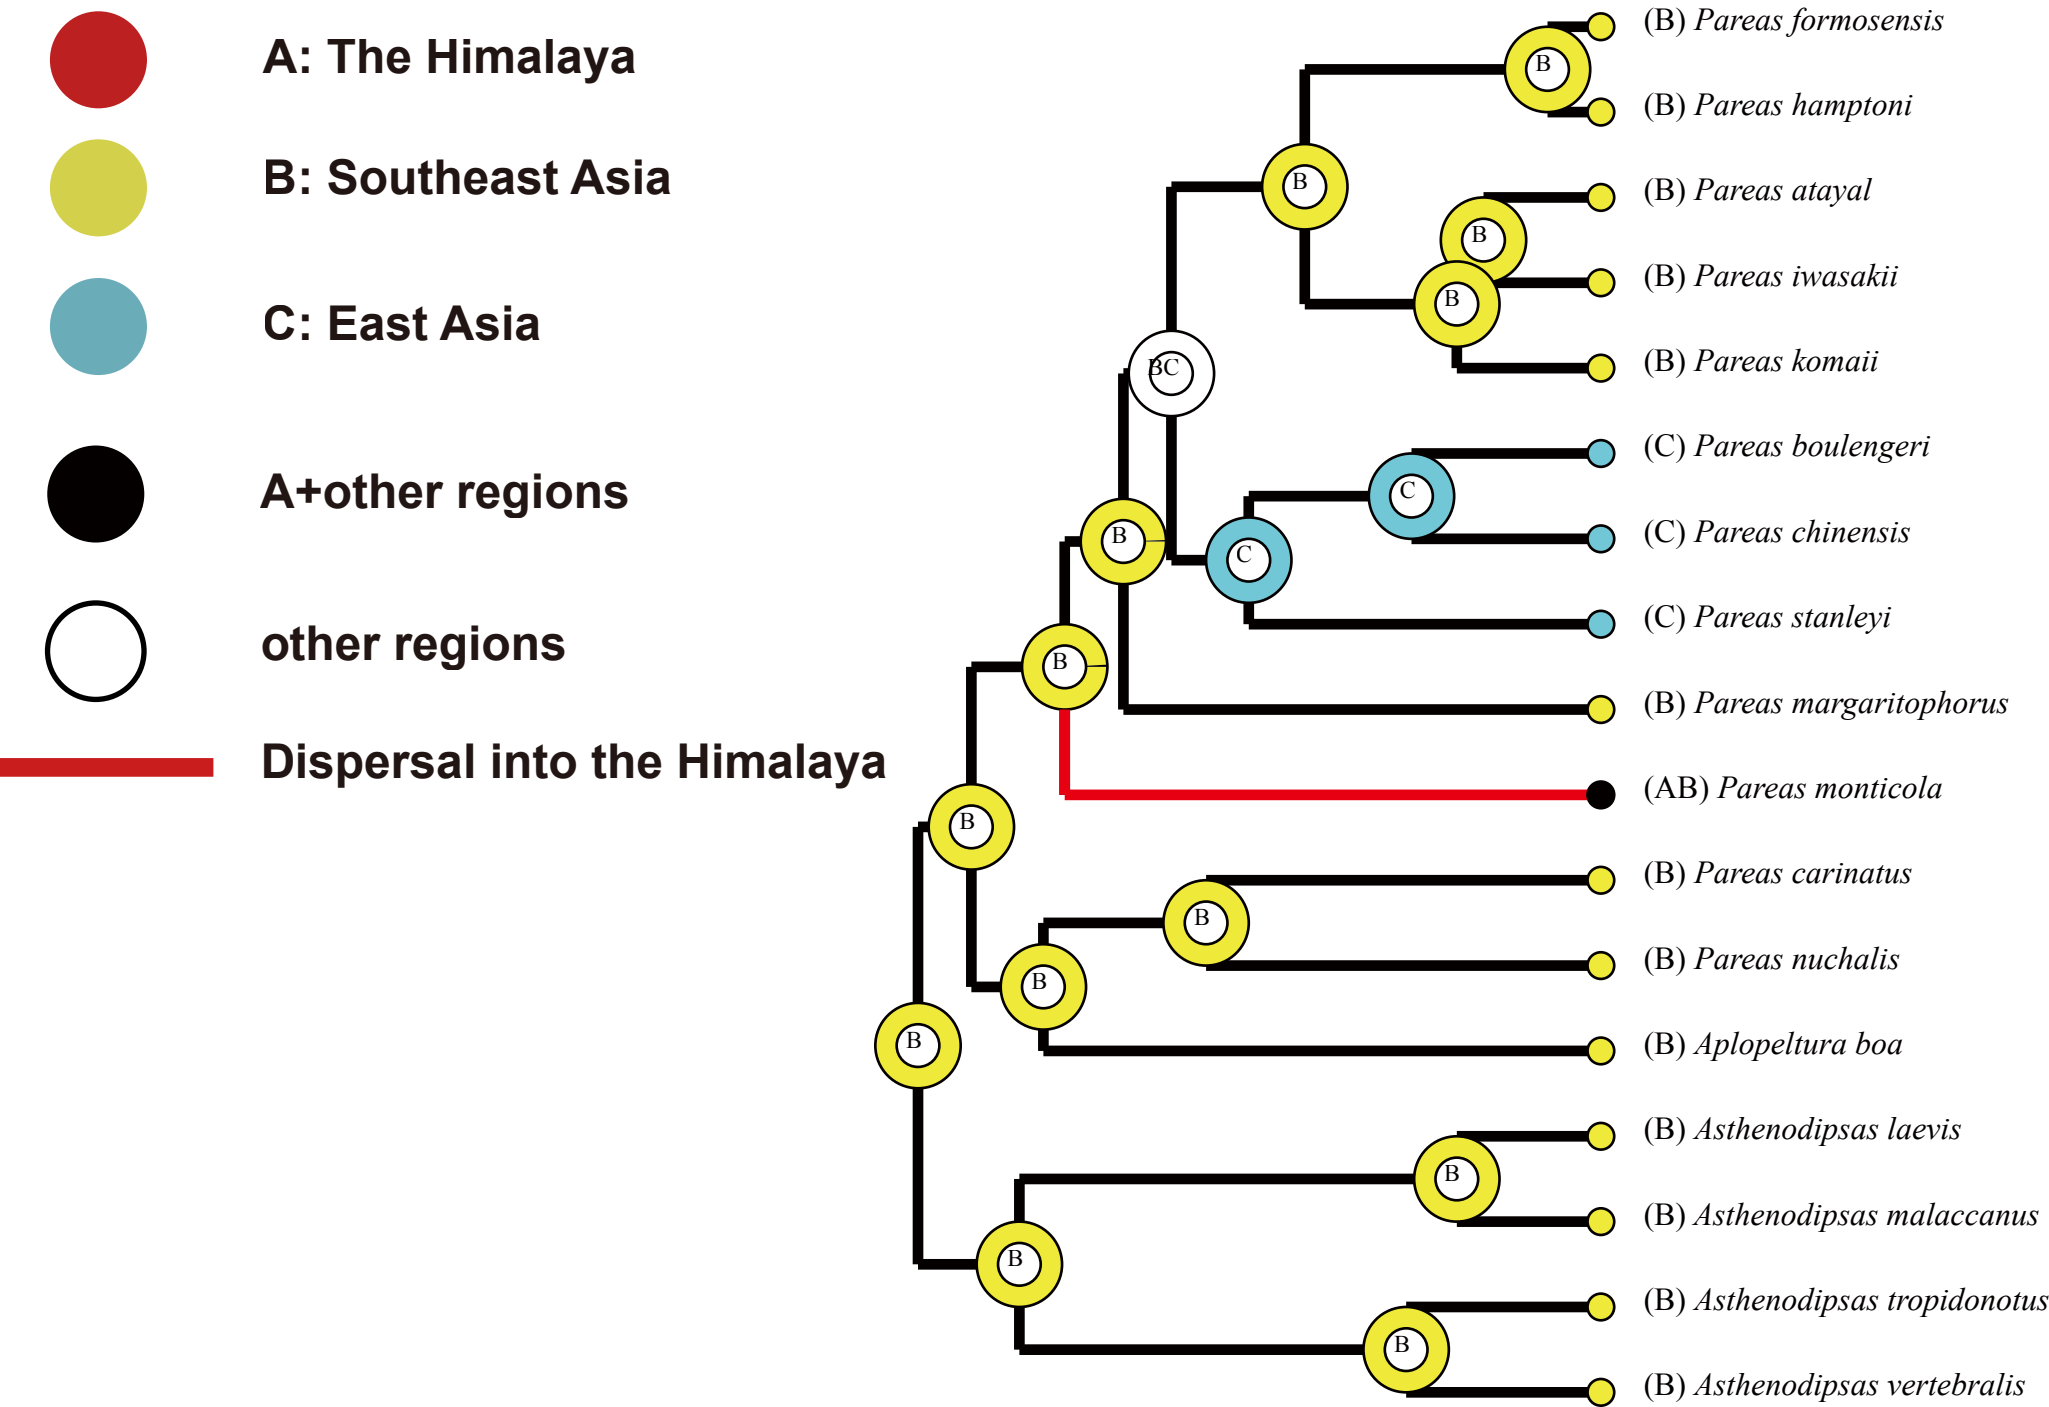

# Ranidae

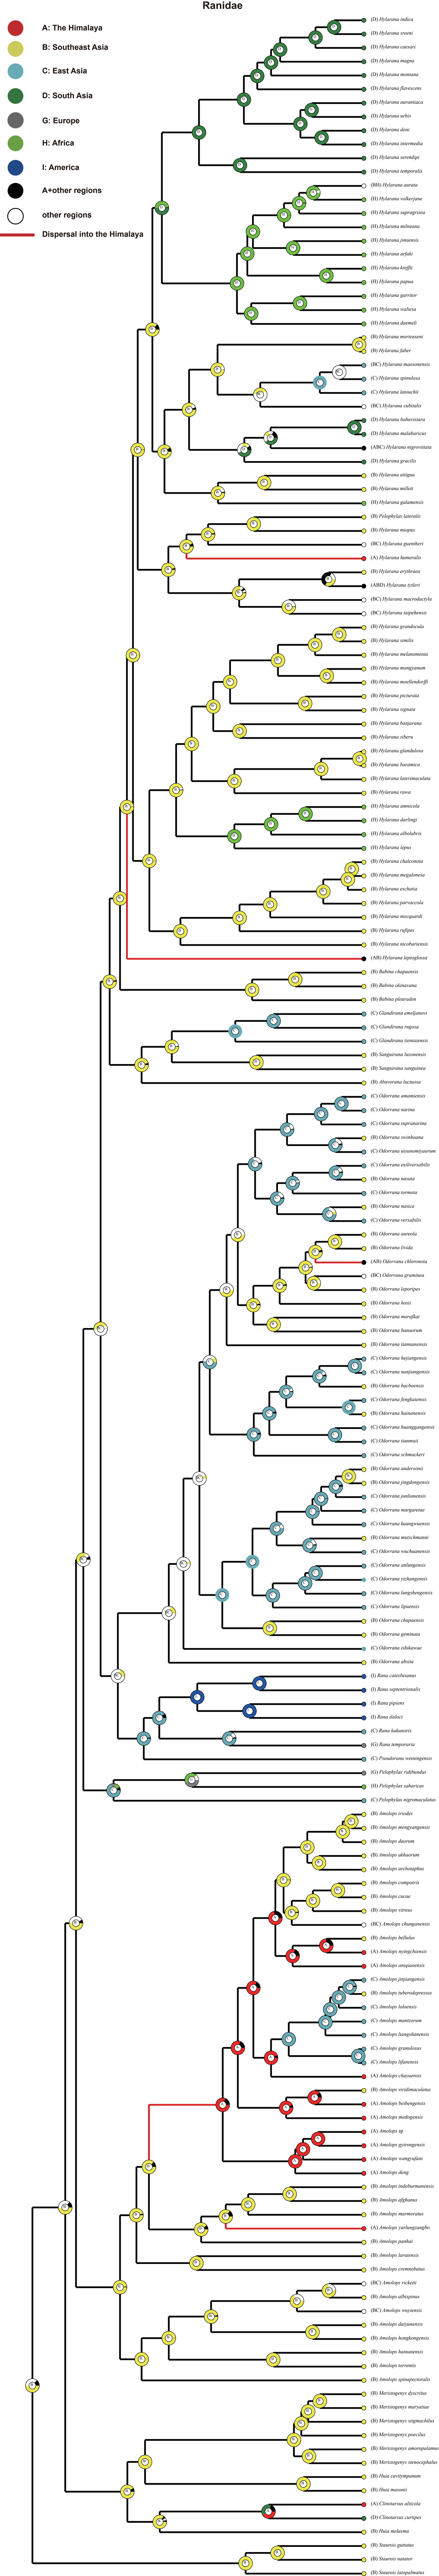

# Rhacophoridae

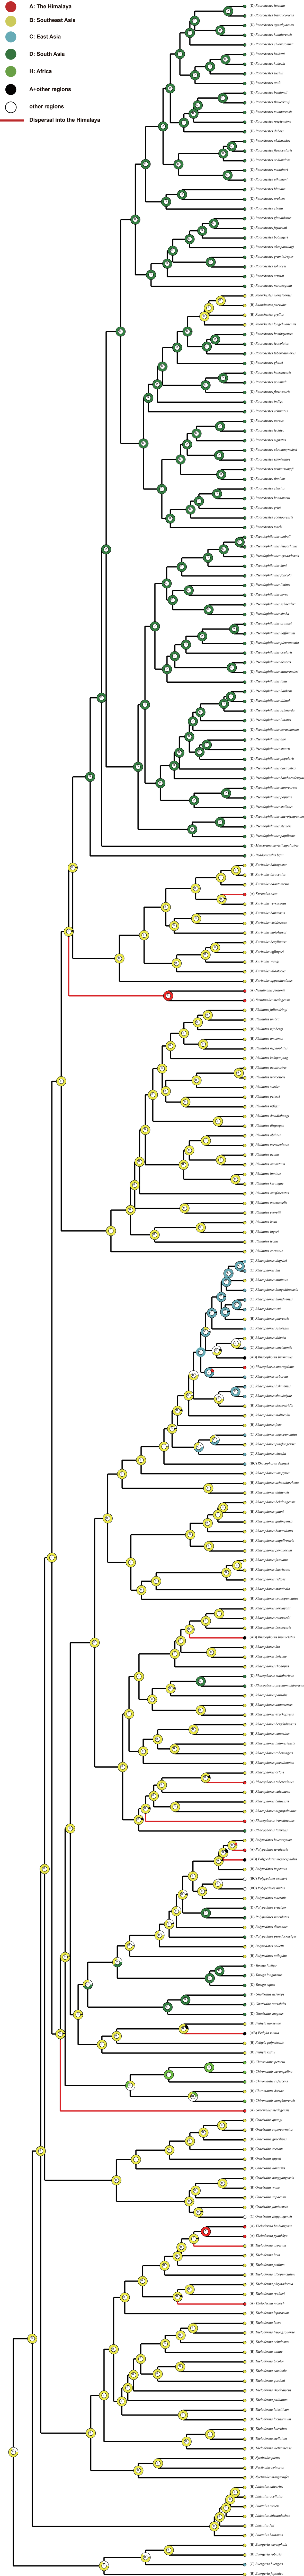

# Scinidae

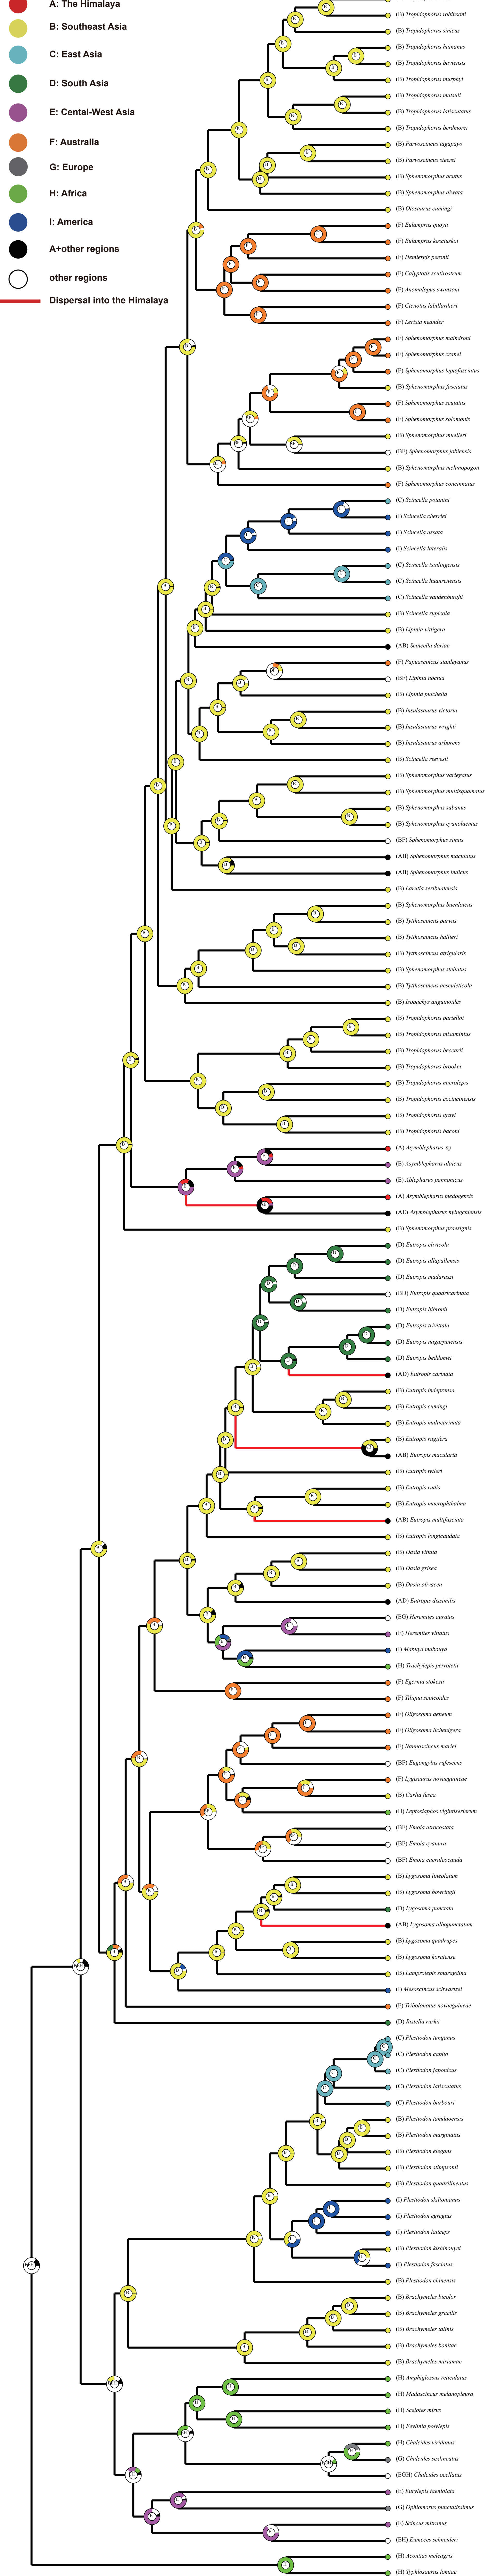

# Viperidae

- **A: The Himalaya**
- **B: Southeast Asia**
- **C: East Asia**
- **D: South Asia**
- **E: Cental-West Asia**
- **G: Europe**
- **H: Africa**
- **I: America**
- **A+other regions**
- other regions**
- **Dispersal into the Himalaya**

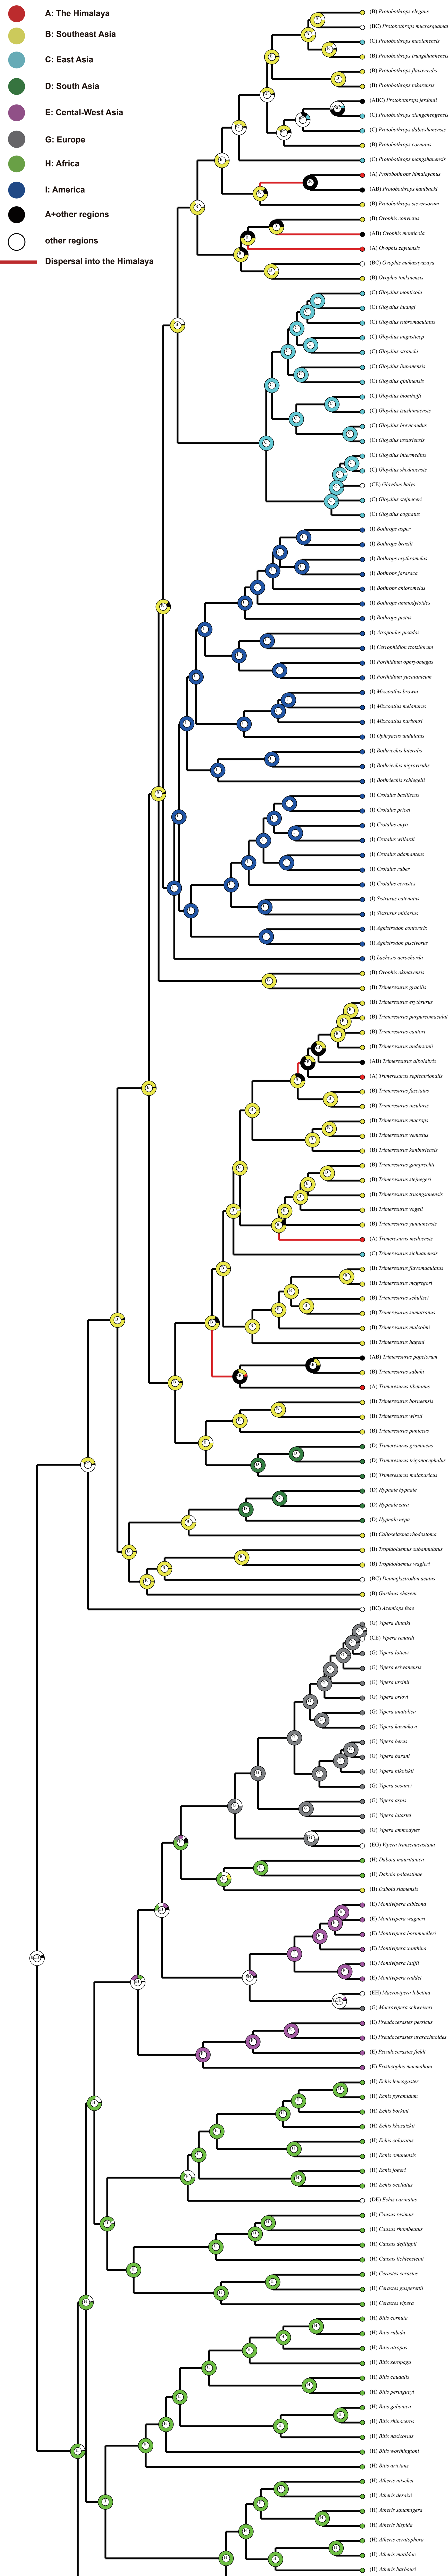

**Data S5.**

Sequences information in this study divided by family. Sequences obtained newly in this study are marked in bold.

**Ranidae**

| <b>Species</b>          | <b>16s</b>      | <b>COI</b> | <b>ND3</b> | <b>ND2</b>      | <b>12s</b> |
|-------------------------|-----------------|------------|------------|-----------------|------------|
| Abavorana_luctuosa      | KY982539        | -          | -          | -               | KF477635   |
| Amnirana_albolabris     | KR264062        | -          | -          | -               | -          |
| Amnirana_amicola        | KX289630        | -          | -          | -               | -          |
| Amnirana_darlingi       | KR264121        | -          | -          | -               | -          |
| Amnirana_galamensis     | KF991278        | -          | -          | -               | -          |
| Amnirana_lepus          | KR264067        | -          | -          | -               | -          |
| Amnirana_nicobariensis  | AB530582        | -          | -          | -               | KP298048   |
| Amolops_afghanus        | MN953654        | -          | -          | MN958713        | -          |
| Amolops_akhaorum        | FJ417158        | -          | -          | FJ417207        | -          |
| Amolops_albispinus      | KX507312        | KX507332   | -          | -               | -          |
| Amolops_aniqiaoensis    | MN953655        | KU243073   | -          | MN958714        | -          |
| Amolops_aniqiaoensis    | MN953656        | -          | -          | MN958715        | -          |
| Amolops_archotaphus     | MN953659        | -          | -          | MN958718        | -          |
| Amolops_beibengensis    | MN953662        | -          | -          | MN958721        | -          |
| Amolops_bellulus        | DQ204473        | KU243079   | FJ417225   | FJ417176        | DQ204429   |
| Amolops_chayuensis      | MN953666        | KU243075   | -          | MN958725        | -          |
| Amolops_chunganensis    | KX507310        | KX507330   | KX645666   | KX645666        | KX645666   |
| Amolops_compotrix       | FJ417141        | -          | FJ417239   | FJ417190        | -          |
| Amolops_cremnobatus     | MN953672        | -          | FJ417241   | MN958730        | -          |
| Amolops_cucae           | FJ417145        | -          | FJ417243   | FJ417194        | -          |
| Amolops_daiyunensis     | <b>MW023599</b> | KX507328   | -          | <b>MW111442</b> | MG991855   |
| Amolops_daorum          | MN953678        | -          | FJ417249   | MN958736        | AF206101   |
| Amolops_granulosus      | MN953680        | -          | -          | MN958738        | DQ204436   |
| Amolops_gyirongensis    | MN953682        | -          | -          | MN958739        | -          |
| Amolops_gyirongensis    | MN953683        | -          | -          | MN958740        | -          |
| Amolops_hainanensis     | MN953688        | KX507342   | -          | MN958745        | MG991858   |
| Amolops_hongkongensis   | MN953689        | MG991921   | -          | MN958746        | MG991861   |
| Amolops_indoburmanensis | MN953692        | -          | -          | MN958749        | MG909644   |
| Amolops_deng            | MN953695        | -          | -          | MN958752        | -          |
| Amolops_deng            | <b>MW023600</b> | -          | -          | <b>MW111443</b> | -          |
| Amolops_iriodes         | FJ417152        | -          | FJ417250   | FJ417201        | -          |
| Amolops_jinjiangensis   | MN953700        | -          | -          | MN958757        | EF453726   |
| Amolops_larutensis      | AB211484        | -          | -          | -               | AB211461   |
| Amolops_liangshanensis  | EF453743        | -          | -          | MN958812        | EF453728   |
| Amolops_lifanensis      | MN953702        | JN700797   | -          | MN958760        | -          |
| Amolops_loloensis       | MN953757        | NC_029250  | NC_029250  | MN958814        | DQ204439   |
| Amolops_mantzorum       | <b>MW023601</b> | NC_024180  | FJ417253   | <b>MW111444</b> | NC_024180  |
| Amolops_marmoratus      | MN953708        | MG935420   | EU861515   | MN958766        | MG909645   |
| Amolops_medogensis      | MN953710        | KU243076   | -          | MN958768        | -          |
| Amolops_medogensis      | MN953711        | -          | -          | MN958769        | -          |
| Amolops_mengyangensis   | KR827703        | KR087618   | -          | -               | -          |

|                         |                 |           |           |                 |           |
|-------------------------|-----------------|-----------|-----------|-----------------|-----------|
| Amolops_nyingchiensis   | MN953715        | KU243071  | -         | MN958773        | -         |
| Amolops_nyingchiensis   | MN953716        | -         | -         | MN958774        | -         |
| Amolops_panhai          | MN953720        | KR087621  | -         | MN958778        | MG909646  |
| Amolops_ricketti        | <b>MW023602</b> | NC_023949 | NC_023949 | <b>MW111445</b> | NC_023949 |
| Amolops_sp              | <b>MW023603</b> | -         | -         | <b>MW111446</b> | -         |
| Amolops_spinapectoralis | MN953769        | -         | FJ417259  | MN958826        | DQ204444  |
| Amolops_torrentis       | EF453744        | MG991932  | -         | MN958784        | MG991872  |
| Amolops_tuberodepressus | MN953729        | KR559270  | FJ417260  | MN958786        | KR559270  |
| Amolops_viridimaculatus | MN953731        | -         | -         | MN958788        | DQ204446  |
| Amolops_vitreus         | FJ417163        | -         | FJ417261  | FJ417212        | -         |
| Amolops_wangyufani      | MN953741        | -         | -         | MN958797        | -         |
| Amolops_wangyufani      | MN953740        | -         | -         | MN958796        | -         |
| Amolops_wuyiensis       | <b>MW023604</b> | KX507325  | KM282625  | <b>MW111447</b> | KM282625  |
| Amolops_yarlungzangbo   | MN953744        | -         | -         | MN958800        | -         |
| Amolops_yarlungzangbo   | MN953745        | -         | -         | MN958801        | -         |
| Babina_chapaensis       | KU840598        | KR087625  | -         | -               | KU840523  |
| Babina_okinavana        | NC_022872       | NC_022872 | NC_022872 | NC_022872       | NC_022872 |
| Babina_pleuraden        | KR264059        | HQ395351  | KF771303  | -               | -         |
| Chalcorana_chalconota   | AB530588        | -         | -         | -               | -         |
| Chalcorana_eschatia     | KR264083        | -         | -         | -               | -         |
| Chalcorana_megalonesa   | KR264085        | -         | -         | -               | -         |
| Chalcorana_mocquardi    | KR264100        | -         | -         | -               | -         |
| Chalcorana_parvaccola   | KR264082        | -         | -         | -               | -         |
| Chalcorana_rufipes      | KR264081        | -         | -         | -               | -         |
| Clinotarsus_alticola    | MG909604        | -         | -         | -               | MG909673  |
| Clinotarsus_curtipes    | KM069013        | KM069121  | -         | -               | -         |
| Glandirana_emeljanovi   | KF771343        | KF771343  | KF771343  | KF771343        | KF771343  |
| Glandirana_rugosa       | KF771341        | KF771341  | KF771341  | KF771341        | KF771341  |
| Glandirana_tientaiensis | KF771342        | KF771342  | KF771342  | KF771342        | KF771342  |
| Huia_cavitympanum       | KU840576        | -         | FJ417216  | FJ417167        | MG909681  |
| Huia_cavitympanum       | AB211489        | -         | -         | -               | AB211466  |
| Huia_masonii            | KP298037        | -         | -         | -               | KP298037  |
| Huia_melasma            | MG909601        | -         | -         | -               | MG909675  |
| Humerana_humeralis      | KU589224        | -         | -         | -               | -         |
| Humerana_miopus         | KR827778        | KR087686  | -         | -               | -         |
| Hydrophylax_bahuvistara | KT334413        | -         | -         | -               | -         |
| Hydrophylax_gracilis    | KM068934        | KM069041  | -         | -               | -         |
| Hydrophylax_leptoglossa | AB530527        | -         | -         | -               | -         |
| Hydrophylax_malabaricus | KM068968        | KM069075  | -         | -               | -         |
| Hylarana_attigua        | EU754872        | -         | -         | -               | -         |
| Hylarana_erythraea      | KR827794        | -         | -         | -               | -         |
| Hylarana_latouchii      | KF771284        | KF771284  | -         | -               | -         |
| Hylarana_macroductyla   | KR264120        | -         | -         | -               | -         |
| Hylarana_taipehensis    | KR264041        | -         | -         | -               | -         |



|                            |           |           |           |           |           |
|----------------------------|-----------|-----------|-----------|-----------|-----------|
| Hylarana_tytleri           | KR264119  | -         | -         | -         | -         |
| Indosylvirana_caesari      | KM068915  | KM069022  | -         | -         | -         |
| Indosylvirana_aurantiaca   | KM068907  | KM069014  | -         | -         | -         |
| Indosylvirana_doni         | KM068922  | KM069029  | -         | -         | -         |
| Indosylvirana_flavescens   | KM068930  | KM069037  | -         | -         | -         |
| Indosylvirana_indica       | KM068943  | KM069050  | -         | -         | -         |
| Indosylvirana_intermedia   | KM068956  | KM069063  | -         | -         | -         |
| Indosylvirana_magna        | KM068964  | KM069071  | -         | -         | -         |
| Indosylvirana_milleti      | KR827825  | -         | -         | -         | -         |
| Indosylvirana_montana      | KM068972  | KM069079  | -         | -         | -         |
| Indosylvirana_serendipi    | KM068979  | KM069086  | -         | -         | -         |
| Indosylvirana_sreeni       | KM068987  | KM069095  | -         | -         | -         |
| Indosylvirana_temporalis   | KM069000  | KM069108  | -         | -         | -         |
| Indosylvirana_urbis        | KM069006  | KM069114  | -         | -         | -         |
| Meristogenys_amoropalamus  | AB526619  | -         | -         | AB526619  | AB360011  |
| Meristogenys_dyscritus     | AB526616  | -         | -         | AB526616  | AB526616  |
| Meristogenys_maryatiae     | AB526611  | -         | -         | AB526611  | AB360046  |
| Meristogenys_poecilus      | AB526610  | -         | -         | -         | AB526610  |
| Meristogenys_stenocephalus | AB526612  | -         | -         | -         | AB526612  |
| Meristogenys_stigmachilus  | AB526614  | -         | -         | -         | AB526614  |
| Odorrana_absita            | EU861542  | -         | EU861516  | EU861568  | -         |
| Odorrana_amamiensis        | AB200947  | -         | -         | -         | AB200923  |
| Odorrana_andersonii        | KF185057  | JN700826  | KF771312  | -         | DQ359965  |
| Odorrana_anlungensis       | KF185049  | -         | -         | -         | KF185013  |
| Odorrana_aureola           | DQ650568  | -         | DQ650437  | DQ650504  | -         |
| Odorrana_bacboensis        | DQ650569  | -         | -         | -         | -         |
| Odorrana_banaorum          | DQ650586  | -         | DQ650455  | DQ650522  | -         |
| Odorrana_chapaensis        | KX893901  | KR087835  | EU861527  | EU861579  | DQ204431  |
| Odorrana_chloronota        | DQ283394  | -         | -         | -         | DQ283394  |
| Odorrana_exiliversabilis   | KF185056  | -         | -         | -         | KF185020  |
| Odorrana_fengkaiensis      | KT315375  | -         | -         | -         | KT315354  |
| Odorrana_geminata          | EU861546  | -         | EU861520  | EU861572  | -         |
| Odorrana_graminea          | KF185038  | -         | -         | -         | KF185002  |
| Odorrana_hainanensis       | NC_034984 | NC_034984 | NC_034984 | NC_034984 | NC_034984 |
| Odorrana_hejiangensis      | KF185052  | -         | -         | -         | KF185016  |
| Odorrana_hosii             | MG935960  | MG935666  | DQ650471  | DQ650539  | KU840535  |
| Odorrana_huanggangensis    | KF185059  | -         | -         | -         | KF185023  |
| Odorrana_ishikawae         | AB511282  | AB511282  | AB511282  | AB511282  | AB511282  |
| Odorrana_jingdongensis     | KF185050  | KR087840  | -         | -         | KF185014  |
| Odorrana_jingdongensis     | FJ417120  | -         | FJ417218  | FJ417169  | -         |
| Odorrana_junlianensis      | KF185058  | -         | -         | -         | KF185022  |
| Odorrana_kuangwuensis      | KF185034  | -         | -         | -         | KF184998  |
| Odorrana_leporipes         | KF185036  | -         | -         | -         | KF185000  |
| Odorrana_lipuensis         | KM388699  | -         | -         | -         | -         |

|                                  |          |          |          |          |          |
|----------------------------------|----------|----------|----------|----------|----------|
| <i>Odorrana livida</i>           | DQ650615 | -        | -        | -        | -        |
| <i>Odorrana lungshengensis</i>   | KF185054 | -        | -        | -        | KF185018 |
| <i>Odorrana margaretae</i>       | EU861566 | KR087843 | EU861540 | EU861592 | KT315371 |
| <i>Odorrana morafkai</i>         | DQ650632 | -        | DQ650498 | DQ650562 | KU840526 |
| <i>Odorrana mutschmanni</i>      | KU356765 | -        | -        | -        | KU356761 |
| <i>Odorrana nanjiangensis</i>    | KF185042 | -        | -        | -        | KF185006 |
| <i>Odorrana narina</i>           | AB511287 | -        | -        | -        | AB511287 |
| <i>Odorrana nasica</i>           | DQ283345 | -        | -        | -        | DQ283345 |
| <i>Odorrana nasuta</i>           | KF185053 | -        | -        | -        | KF185017 |
| <i>Odorrana schmackeri</i>       | KF185047 | KP732086 | KP732086 | KP732086 | KF185011 |
| <i>Odorrana supranarina</i>      | AB200950 | -        | -        | -        | AB200926 |
| <i>Odorrana swinhoana</i>        | AB200953 | -        | -        | -        | AB200929 |
| <i>Odorrana tianmuui</i>         | KF185040 | -        | -        | -        | KF185004 |
| <i>Odorrana tiannanensis</i>     | EF453751 | KR087851 | -        | -        | EF453736 |
| <i>Odorrana tormota</i>          | DQ835616 | DQ835616 | DQ835616 | DQ835616 | DQ835616 |
| <i>Odorrana utsunomiyaorum</i>   | AB200952 | -        | -        | -        | AB200928 |
| <i>Odorrana versabilis</i>       | KF185055 | -        | -        | -        | KF185019 |
| <i>Odorrana wuchuanensis</i>     | KF185043 | KU680791 | KU680791 | KU680791 | KF185007 |
| <i>Odorrana yizhangensis</i>     | KF185048 | -        | -        | -        | KF185012 |
| <i>Papurana daemeli</i>          | KR264056 | -        | -        | -        | -        |
| <i>Papurana arfaki</i>           | KR264048 | -        | -        | -        | -        |
| <i>Papurana aurata</i>           | KR264101 | -        | -        | -        | -        |
| <i>Papurana garritor</i>         | KR264042 | -        | -        | -        | -        |
| <i>Papurana jimienensis</i>      | KR264053 | -        | -        | -        | EU004610 |
| <i>Papurana krefftii</i>         | KR264050 | -        | -        | -        | -        |
| <i>Papurana milneana</i>         | KR264044 | -        | -        | -        | -        |
| <i>Papurana papua</i>            | KR264054 | -        | -        | -        | -        |
| <i>Papurana supragrisea</i>      | KR264058 | -        | -        | -        | -        |
| <i>Papurana volkerjane</i>       | KR264105 | -        | -        | -        | -        |
| <i>Papurana waliesia</i>         | KR264046 | -        | -        | -        | -        |
| <i>Pelophylax lateralis</i>      | KF991279 | MG935537 | -        | -        | AF206098 |
| <i>Pelophylax nigromaculatus</i> | KT878718 | KT878718 | KT878718 | KT878718 | KT878718 |
| <i>Pelophylax ridibundus</i>     | MH410481 | KT879314 | MH410361 | KJ160682 | AB640897 |
| <i>Pelophylax saharicus</i>      | KP177671 | KP177812 | GU812242 | GU812146 | -        |
| <i>Pseudorana weiningensis</i>   | DQ359996 | -        | -        | KX269432 | KX269217 |
| <i>Pulchrana banjarana</i>       | KF477645 | -        | -        | -        | KF477645 |
| <i>Pulchrana baramica</i>        | KF052066 | -        | -        | -        | -        |
| <i>Pulchrana glandulosa</i>      | AB719226 | -        | -        | -        | AB719209 |
| <i>Pulchrana grandocula</i>      | KF477662 | -        | -        | -        | KF477662 |
| <i>Pulchrana laterimaculata</i>  | AB719228 | -        | -        | -        | AB719211 |
| <i>Pulchrana mangyanum</i>       | KF477685 | -        | -        | -        | KF477685 |
| <i>Pulchrana melanomenta</i>     | KF477692 | -        | -        | -        | KF477692 |
| <i>Pulchrana moellendorffi</i>   | KF477696 | -        | -        | -        | KF477696 |
| <i>Pulchrana picturata</i>       | KR264070 | -        | -        | -        | -        |

|                              |             |             |            |             |             |
|------------------------------|-------------|-------------|------------|-------------|-------------|
| Pulchrana_rawa               | AB719222    | -           | -          | -           | AB719205    |
| Pulchrana_siberu             | KF477741    | -           | -          | -           | KF477741    |
| Pulchrana_signata            | KF052074    | -           | -          | -           | -           |
| Pulchrana_similis            | KR264078    | -           | -          | -           | -           |
| Rana_catesbeianus            | NC_022696   | NC_022696   | NC_022696  | NC_022696   | NC_022696   |
| Rana_kukunoris               | KX269185    | NC_035804   | NC_035804  | KX269401    | KX269185    |
| Rana_pipiens                 | X86284      | EF525892    | -          | -           | Y10945      |
| Rana_septentrionalis         | KX269179    | EF525899    | -          | AY206487    | KX269179    |
| Rana_temporaria              | AB058882    | KP697915    | -          | AF314018    | AB058864    |
| Rana_tlaloci                 | AY779234    | -           | -          | KX269393    | AY779234    |
| Sanguirana_luzonensis        | KT881700    | -           | -          | -           | KP298050    |
| Sanguirana_sanguinea         | KP298051    | -           | -          | -           | KP298051    |
| Staurois_guttatus            | MG909607    | -           | -          | -           | MG909682    |
| Staurois_latopalmodus        | FJ417117    | -           | FJ417215   | FJ417166    | -           |
| Staurois_natator             | DQ347312    | -           | -          | -           | -           |
| Sylvirana_cubitalis          | KR264077    | -           | -          | -           | -           |
| Sylvirana_faber              | KR827803    | KR087706    | -          | -           | -           |
| Sylvirana_guentheri          | NC_024748   | NC_024748   | NC_024748  | NC_024748   | NC_024748   |
| Sylvirana_maosonensis        | KR827809    | -           | -          | -           | -           |
| Sylvirana_mortenseni         | MG606638    | -           | MG607315   | MG606971    | KU840542    |
| Sylvirana_nigrovittata       | KF739002    | -           | -          | -           | -           |
| Sylvirana_spinulosa          | KR264093    | -           | -          | -           | -           |
| <b>Outgroup</b>              |             |             |            |             |             |
| Buergeria_oxycephalus        | KU244359    | KU244459    | -          | -           | -           |
| Cacosternum_magnaglandiferus | KJ461733    | -           | -          | DQ251462    | DQ022321    |
| Conraua_crassipes            | DQ022355    | KY079583    | -          | -           | DQ022324    |
| Cornufer_guentheri           | KP298021    | AY883979    | -          | -           | DQ283198    |
| Mantidactylus_guttulatus     | FJ559237    | KF611529    | -          | -           | -           |
| Phrynomantis_anelectus       | AF215377.2  | EF396060    | -          | -           | -           |
| Odontobatrachus_natator      | KP284863    | -           | -          | -           | KP005222    |
| Phrynodon_sandersoni         | DQ283083    | -           | -          | -           | DQ283083    |
| Ptychadena_cooperi           | -           | KF380535    | -          | -           | -           |
|                              |             |             |            |             | EU979664-   |
| Quasipaa_delacouri           | EU979810    | -           | -          | -           | EU979750    |
| Kurixalus_verrucosus         | KX554502    | KX554568    | -          | -           | KC465825    |
| Theloderma_corticale         | KU244365    | KU244453    | -          | -           | -           |
| <b>Species</b>               | <b>Cytb</b> | <b>RAG1</b> | <b>Tyr</b> | <b>RAG2</b> | <b>Rhod</b> |
| Abavorana_luctuosa           | -           | KR264407    | KR264482   | -           | -           |
| Amnirana_albolabris          | KR264152    | -           | -          | -           | -           |
| Amnirana_amicola             | -           | -           | -          | -           | -           |
| Amnirana_darlingi            | KR264208    | KR264430    | KR264506   | -           | -           |
| Amnirana_galamensis          | -           | -           | -          | -           | -           |
| Amnirana_lepus               | KR264157    | KR264390    | KR264458   | -           | -           |
| Amnirana_nicobariensis       | KR264189    | KU840721    | KU840777   | -           | KU840659    |

|                         |           |                 |                 |          |          |
|-------------------------|-----------|-----------------|-----------------|----------|----------|
| Amolops_afghanus        | -         | <b>MW111381</b> | <b>MW111304</b> | -        | -        |
| Amolops_akhaorum        | -         | FJ417291        | FJ417324        | -        | -        |
| Amolops_albispinus      | -         | -               | -               | -        | -        |
| Amolops_aniqiaoensis    | -         | <b>MW111382</b> | <b>MW111305</b> | -        | -        |
| Amolops_aniqiaoensis    | -         | <b>MW111383</b> | <b>MW111306</b> | -        | -        |
| Amolops_archotaphus     | -         | <b>MW111384</b> | <b>MW111307</b> | -        | -        |
| Amolops_beibengensis    | -         | <b>MW111385</b> | <b>MW111308</b> | -        | -        |
| Amolops_bellulus        | -         | FJ417267        | FJ417300        | -        | -        |
| Amolops_chayuensis      | -         | <b>MW111386</b> | <b>MW111309</b> | -        | -        |
| Amolops_chunganensis    | KX645666  | <b>MW111387</b> | <b>MW111310</b> | -        | -        |
| Amolops_compotrix       | -         | EF088235        | EU076757        | -        | -        |
| Amolops_cremnobatus     | -         | <b>MW111388</b> | <b>MW111311</b> | -        | -        |
| Amolops_cucae           | -         | FJ417284        | FJ417317        | -        | -        |
| Amolops_daiyunensis     | -         | <b>MW111389</b> | <b>MW111312</b> | -        | -        |
| Amolops_daorum          | -         | <b>MW111390</b> | <b>MW111313</b> | -        | -        |
| Amolops_granulosus      | -         | <b>MW111391</b> | <b>MW111314</b> | -        | -        |
| Amolops_gyirongensis    | -         | <b>MW111392</b> | <b>MW111315</b> | -        | -        |
| Amolops_gyirongensis    | -         | <b>MW111393</b> | <b>MW111316</b> | -        | -        |
| Amolops_hainanensis     | -         | <b>MW111394</b> | <b>MW111317</b> | DQ019518 | KU840677 |
| Amolops_hongkongensis   | -         | <b>MW111395</b> | <b>MW111318</b> | -        | -        |
| Amolops_indoburmanensis | -         | <b>MW111396</b> | <b>MW111319</b> | -        | -        |
| Amolops_deng            | -         | <b>MW111397</b> | <b>MW111320</b> | -        | -        |
| Amolops_deng            | -         | <b>MW111398</b> | <b>MW111321</b> | -        | -        |
| Amolops_iriodes         | -         | FJ417289        | FJ417322        | -        | -        |
| Amolops_jinjiangensis   | -         | <b>MW111399</b> | <b>MW111322</b> | -        | -        |
| Amolops_larutensis      | -         | DQ347279        | DQ347186        | -        | -        |
| Amolops_liangshanensis  | -         | <b>MW111400</b> | <b>MW111323</b> | -        | -        |
| Amolops_lifanensis      | -         | <b>MW111401</b> | <b>MW111324</b> | -        | -        |
| Amolops_loloensis       | NC_029250 | <b>MW111402</b> | <b>MW111325</b> | -        | -        |
| Amolops_mantzorum       | NC_024180 | <b>MW111403</b> | <b>MW111326</b> | -        | -        |
| Amolops_marmoratus      | AB259738  | <b>MW111404</b> | <b>MW111327</b> | -        | -        |
| Amolops_medogensis      | -         | <b>MW111405</b> | <b>MW111328</b> | -        | -        |
| Amolops_medogensis      | -         | <b>MW111406</b> | <b>MW111329</b> | -        | -        |
| Amolops_mengyangensis   | -         | -               | -               | -        | -        |
| Amolops_ningchiensis    | -         | <b>MW111407</b> | <b>MW111330</b> | -        | -        |
| Amolops_ningchiensis    | -         | <b>MW111408</b> | <b>MW111331</b> | -        | -        |
| Amolops_panhai          | -         | <b>MW111409</b> | <b>MW111332</b> | -        | -        |
| Amolops_ricketti        | NC_023949 | <b>MW111410</b> | <b>MW111333</b> | -        | DQ360009 |
| Amolops_sp              | -         | <b>MW111411</b> | <b>MW111334</b> | -        | -        |
| Amolops_spinapectoralis | -         | <b>MW111412</b> | <b>MW111335</b> | -        | -        |
| Amolops_torrentis       | -         | <b>MW111413</b> | <b>MW111336</b> | -        | -        |
| Amolops_tuberodepressus | KR559270  | <b>MW111414</b> | <b>MW111337</b> | -        | -        |
| Amolops_viridimaculatus | -         | <b>MW111415</b> | <b>MW111338</b> | -        | -        |
| Amolops_vitreus         | -         | FJ417295        | FJ417328        | -        | -        |

|                          |           |                 |                 |   |          |
|--------------------------|-----------|-----------------|-----------------|---|----------|
| Amolops_wangyufani       | -         | <b>MW111416</b> | <b>MW111339</b> | - | -        |
| Amolops_wangyufani       | -         | <b>MW111417</b> | <b>MW111340</b> | - | -        |
| Amolops_wuyiensis        | KM282625  | <b>MW111418</b> | <b>MW111341</b> | - | -        |
| Amolops_yarlungzangbo    | -         | <b>MW111419</b> | <b>MW111342</b> | - | -        |
| Amolops_yarlungzangbo    | -         | <b>MW111420</b> | <b>MW111343</b> | - | -        |
| Babina_chapaensis        | KR264164  | KR264393        | DQ282981        | - | DQ283987 |
| Babina_okinavana         | NC_022872 | -               | -               | - | -        |
| Babina_pleuraden         | KR264150  | KR264384        | KR264453        | - | -        |
| Chalcorana_chalconota    | -         | -               | -               | - | -        |
| Chalcorana_eschatia      | KR264174  | KR264402        | KR264476        | - | -        |
| Chalcorana_megalonesa    | -         | -               | -               | - | -        |
| Chalcorana_mocquardi     | KR264191  | KR264418        | KR264494        | - | -        |
| Chalcorana_parvaccola    | KR264173  | KR264401        | KR264475        | - | -        |
| Chalcorana_rufipes       | KR264172  | KR264400        | KR264474        | - | -        |
| Clinotarsus_alticola     | -         | MG909641        | MG909717        | - | -        |
| Clinotarsus_curtipes     | KM069226  | KM069261        | AF249180        | - | AF249117 |
| Glandirana_emeljanovi    | KF771343  | -               | -               | - | -        |
| Glandirana_rugosa        | KF771341  | -               | -               | - | -        |
| Glandirana_tientaiensis  | KF771342  | -               | -               | - | -        |
| Huia_cavitympanum        | -         | EF088246        | MG909710        | - | KU840634 |
| Huia_cavitympanum        | -         | -               | -               | - | -        |
| Huia_masonii             | -         | EF088247        | EU076770        | - | -        |
| Huia_melasma             | -         | MG909637        | MG909715        | - | -        |
| Humerana_humeralis       | -         | -               | -               | - | -        |
| Humerana_miopus          | KR264171  | -               | -               | - | -        |
| Hydrophylax_bahuvistara  | -         | -               | -               | - | -        |
| Hydrophylax_gracilis     | KM069149  | KM069232        | -               | - | -        |
| Hydrophylax_leptoglossa  | -         | -               | -               | - | -        |
| Hydrophylax_malabaricus  | KM069182  | KM069242        | -               | - | -        |
| Hylarana_attigua         | -         | -               | -               | - | -        |
| Hylarana_erythraea       | -         | -               | -               | - | -        |
| Hylarana_latouchii       | -         | -               | -               | - | -        |
| Hylarana_macroductyla    | KR264207  | KR264429        | KR264505        | - | -        |
| Hylarana_taipehensis     | KR264132  | KR264366        | -               | - | -        |
| Hylarana_tytleri         | KR264206  | KR264428        | -               | - | -        |
| Indosylvirana_caesari    | KM069130  | KM069228        | -               | - | -        |
| Indosylvirana_aurantiaca | KM069122  | -               | -               | - | -        |
| Indosylvirana_doni       | KM069137  | KM069229        | -               | - | -        |
| Indosylvirana_flavescens | KM069145  | KM069230        | -               | - | -        |
| Indosylvirana_indica     | KM069158  | KM069235        | -               | - | -        |
| Indosylvirana_intermedia | KM069170  | KM069238        | -               | - | -        |
| Indosylvirana_magna      | KM069178  | -               | -               | - | -        |
| Indosylvirana_milleti    | -         | -               | -               | - | -        |
| Indosylvirana_montana    | KM069186  | KM069245        | -               | - | -        |

|                            |           |          |          |   |          |
|----------------------------|-----------|----------|----------|---|----------|
| Indosylvirana_serendipi    | KM069193  | KM069248 | -        | - | -        |
| Indosylvirana_sreeni       | KM069201  | KM069249 | -        | - | -        |
| Indosylvirana_temporalis   | KM069214  | KM069254 | -        | - | -        |
| Indosylvirana_urbis        | KM069219  | KM069256 | -        | - | -        |
| Meristogenys_amoropalamus  | AB360107  | AB526673 | -        | - | AB360222 |
| Meristogenys_dyscritus     | AB526628  | AB526670 | -        | - | AB360216 |
| Meristogenys_maryatiae     | AB526623  | AB526665 | -        | - | AB360231 |
| Meristogenys_poecilus      | AB526622  | AB526664 | -        | - | -        |
| Meristogenys_stenocephalus | AB526624  | AB526666 | -        | - | -        |
| Meristogenys_stigmachilus  | AB526626  | AB526668 | -        | - | AB360235 |
| Odorrana_absita            | -         | EF088245 | EU076768 | - | -        |
| Odorrana_amamiensis        | -         | -        | -        | - | -        |
| Odorrana_andersonii        | KR264154  | KR264387 | KR264455 | - | DQ360018 |
| Odorrana_anlungensis       | -         | -        | -        | - | -        |
| Odorrana_aureola           | -         | -        | -        | - | -        |
| Odorrana_bacboensis        | -         | -        | -        | - | -        |
| Odorrana_banaorum          | -         | -        | -        | - | -        |
| Odorrana_chapaensis        | -         | EF088255 | EU076778 | - | DQ283992 |
| Odorrana_chloronota        | -         | -        | -        | - | -        |
| Odorrana_exiliversabilis   | -         | -        | -        | - | -        |
| Odorrana_fengkaiensis      | -         | -        | -        | - | -        |
| Odorrana_geminata          | -         | -        | -        | - | -        |
| Odorrana_graminea          | -         | -        | -        | - | -        |
| Odorrana_hainanensis       | NC_034984 | KU840725 | -        | - | KU840664 |
| Odorrana_hejiangensis      | -         | -        | -        | - | -        |
| Odorrana_hosii             | KR264179  | KU840732 | KU840785 | - | KU840633 |
| Odorrana_huanggangensis    | -         | -        | -        | - | -        |
| Odorrana_ishikawae         | AB511282  | -        | -        | - | -        |
| Odorrana_jingdongensis     | -         | -        | -        | - | -        |
| Odorrana_jingdongensis     | -         | EF088258 | EU076781 | - | -        |
| Odorrana_junlianensis      | -         | -        | -        | - | -        |
| Odorrana_kuangwuensis      | -         | -        | -        | - | -        |
| Odorrana_leporipes         | -         | -        | -        | - | -        |
| Odorrana_lipuensis         | -         | -        | -        | - | -        |
| Odorrana_livida            | -         | -        | -        | - | -        |
| Odorrana_lungshengensis    | -         | -        | -        | - | -        |
| Odorrana_margaretae        | KU217312  | EF088261 | EU076785 | - | DQ360017 |
| Odorrana_morafkai          | -         | EF088263 | EU076787 | - | KU840630 |
| Odorrana_mutschmanni       | -         | -        | -        | - | -        |
| Odorrana_nanjiangensis     | -         | -        | -        | - | -        |
| Odorrana_narina            | -         | -        | -        | - | -        |
| Odorrana_nasica            | -         | -        | -        | - | -        |
| Odorrana_nasuta            | -         | -        | -        | - | -        |
| Odorrana_schmackeri        | KP732086  | -        | -        | - | -        |

|                           |           |          |          |          |          |
|---------------------------|-----------|----------|----------|----------|----------|
| Odorrana_supranarina      | -         | -        | -        | -        | -        |
| Odorrana_swinhoana        | -         | -        | -        | -        | -        |
| Odorrana_tianmuis         | -         | -        | -        | -        | -        |
| Odorrana_tiannanensis     | -         | -        | -        | -        | -        |
| Odorrana_tormota          | DQ835616  | EU076750 | EU076766 | -        | -        |
| Odorrana_utsunomiyaorum   | -         | -        | -        | -        | -        |
| Odorrana_versabilis       | -         | -        | -        | -        | -        |
| Odorrana_wuchuanensis     | KU680791  | -        | -        | -        | -        |
| Odorrana_yizhangensis     | -         | -        | -        | -        | -        |
| Papurana_daemeli          | KR264147  | KR264381 | KR264452 | -        | -        |
| Papurana_arfaki           | KR264139  | KR264373 | KR264447 | -        | -        |
| Papurana_aurata           | KR264192  | KR264419 | KR264495 | -        | -        |
| Papurana_garritor         | KR264133  | KR264367 | KR264441 | -        | -        |
| Papurana_jimiensis        | KR264144  | KR264377 | -        | -        | -        |
| Papurana_kreffti          | KR264141  | KR264375 | KR264448 | -        | -        |
| Papurana_milneana         | KR264135  | KR264369 | KR264443 | -        | -        |
| Papurana_papua            | KR264145  | KR264379 | KR264450 | -        | -        |
| Papurana_supragrisea      | KR264149  | KR264383 | -        | -        | -        |
| Papurana_volkerjane       | KR264196  | KR264421 | KR264498 | -        | -        |
| Papurana_waliesa          | KR264137  | KR264371 | KR264445 | -        | -        |
| Pelophylax_lateralis      | KF991320  | EF088273 | EU076800 | -        | -        |
| Pelophylax_nigromaculatus | KT878718  | HQ902533 | DQ282932 | -        | KU840635 |
| Pelophylax_ridibundus     | MG575226  | -        | KT879356 | -        | -        |
| Pelophylax_saharicus      | GU799108  | KP177854 | KT879338 | -        | AY148014 |
| Pseudorana_weiningensis   | KX269362  | KX269582 | DQ360050 | KX269657 | DQ360019 |
| Pulchrana_banjarana       | -         | -        | KF477517 | -        | -        |
| Pulchrana_baramica        | -         | -        | -        | -        | -        |
| Pulchrana_glandulosa      | -         | -        | -        | -        | -        |
| Pulchrana_grandocula      | -         | -        | KF477534 | -        | -        |
| Pulchrana_laterimaculata  | -         | -        | -        | -        | -        |
| Pulchrana_mangyanum       | -         | -        | KF477555 | -        | -        |
| Pulchrana_melanomenta     | -         | -        | KF477562 | -        | -        |
| Pulchrana_moellendorffi   | -         | -        | KF477566 | -        | -        |
| Pulchrana_picturata       | KR264159  | KR264433 | KR264461 | -        | -        |
| Pulchrana_rawa            | -         | -        | -        | -        | -        |
| Pulchrana_siberu          | -         | -        | KF477591 | -        | -        |
| Pulchrana_signata         | -         | -        | -        | -        | -        |
| Pulchrana_similis         | KR264168  | -        | KR264468 | -        | -        |
| Rana_catesbeianus         | NC_022696 | AB612037 | AB612039 | AB612038 | -        |
| Rana_kukunoris            | KX269332  | KX269550 | KX269778 | KX269625 | -        |
| Rana_pipiens              | KM396244  | -        | EU769542 | -        | DQ283831 |
| Rana_septentrionalis      | AY083273  | KX269529 | KX269757 | KX269605 | -        |
| Rana_temporaria           | MF624355  | AY323776 | KC800261 | AY323803 | -        |
| Rana_tlaloci              | KX269323  | KX269540 | KX269768 | KX269616 | -        |

|                                     |             |             |               |              |              |
|-------------------------------------|-------------|-------------|---------------|--------------|--------------|
| <i>Sanguirana luzonensis</i>        | KR264202    | KT881670    | KR264502      | -            | DQ347351     |
| <i>Sanguirana sanguinea</i>         | -           | KT881675    | KT881866      | -            | DQ347392     |
| <i>Staurois guttatus</i>            | -           | MG909642    | MG909718      | -            | KU840657     |
| <i>Staurois latopalmatius</i>       | -           | EF088277    | EU076805      | -            | -            |
| <i>Staurois natator</i>             | AB259736    | DQ347250    | DQ347155      | -            | DQ347371     |
| <i>Sylvirana cubitalis</i>          | KR264167    | KR264396    | KR264467      | -            | -            |
| <i>Sylvirana faber</i>              | -           | -           | -             | -            | -            |
| <i>Sylvirana guentheri</i>          | NC_024748   | KX208782    | KR264440      | KX208921     | KU840653     |
| <i>Sylvirana maosonensis</i>        | -           | -           | -             | -            | -            |
| <i>Sylvirana mortenseni</i>         | KR264166    | KU840712    | -             | -            | KU840650     |
| <i>Sylvirana nigrovittata</i>       | -           | -           | -             | -            | -            |
| <i>Sylvirana spinulosa</i>          | KR264185    | KR264411    | KR264487      | -            | -            |
| <b>Outgroup</b>                     |             |             |               |              |              |
| <i>Buergeria oxycephalus</i>        | -           | -           | KU244357      | -            | KU244313     |
| <i>Cacosternum magnaglandiferus</i> | -           | -           | KF144577      | -            | -            |
| <i>Conraua crassipes</i>            | -           | DQ019498    | -             | KX208877     | -            |
| <i>Cornufer guentheri</i>           | -           | DQ019496    | DQ283024      | DQ019522     | DQ283881     |
| <i>Mantidactylus guttulatus</i>     | JN133020    | -           | -             | -            | -            |
| <i>Phrynomantis annectens</i>       | -           | EF396099    | EF395985      | EF396139     | -            |
| <i>Odontobatrachus natator</i>      | KP005427    | KP005354    | -             | KX208908     | -            |
| <i>Phrynodon sandersoni</i>         | -           | GU457749    | DQ282973      | -            | DQ283975     |
| <i>Ptychadena cooperi</i>           | -           | MF078097    | MF078140      | -            | DQ283792     |
| <i>Quasipaa delacouri</i>           | -           | -           | EU979991      | -            | EU979900     |
| <i>Kurixalus verrucosus</i>         | -           | KX554766    | KX554671      | -            | -            |
| <i>Theلودerma corticale</i>         | -           | -           | KU244353      | -            | KU244315     |
| <b>Species</b>                      | <b>BDNF</b> | <b>POMC</b> | <b>SLC8A3</b> | <b>CXCR4</b> | <b>C-myc</b> |
| <i>Abavorana luctuosa</i>           | -           | -           | -             | -            | KR264252     |
| <i>Amnirana albolabris</i>          | -           | -           | -             | -            | -            |
| <i>Amnirana amnicola</i>            | -           | -           | -             | -            | -            |
| <i>Amnirana darlingi</i>            | -           | -           | -             | KR264356     | -            |
| <i>Amnirana galamensis</i>          | -           | -           | -             | -            | -            |
| <i>Amnirana lepus</i>               | -           | -           | -             | KR264310     | -            |
| <i>Amnirana nicobariensis</i>       | -           | -           | -             | -            | KR264245     |
| <i>Amolops afghanus</i>             | -           | -           | -             | -            | -            |
| <i>Amolops akhaorum</i>             | -           | -           | -             | -            | -            |
| <i>Amolops albispinus</i>           | -           | -           | -             | -            | -            |
| <i>Amolops aniqiaoensis</i>         | -           | -           | -             | -            | -            |
| <i>Amolops aniqiaoensis</i>         | -           | -           | -             | -            | -            |
| <i>Amolops archotaphus</i>          | -           | -           | -             | -            | -            |
| <i>Amolops beibengensis</i>         | -           | -           | -             | -            | -            |
| <i>Amolops bellulus</i>             | -           | -           | -             | -            | -            |
| <i>Amolops chayuensis</i>           | -           | -           | -             | -            | -            |
| <i>Amolops chunganensis</i>         | -           | -           | -             | -            | -            |
| <i>Amolops compotrix</i>            | -           | -           | -             | -            | -            |



|                         |   |   |   |          |          |
|-------------------------|---|---|---|----------|----------|
| Amolops_cremnobatus     | - | - | - | -        | -        |
| Amolops_cucae           | - | - | - | -        | -        |
| Amolops_daiyunensis     | - | - | - | -        | -        |
| Amolops_daorum          | - | - | - | -        | -        |
| Amolops_granulosus      | - | - | - | -        | -        |
| Amolops_gyirongensis    | - | - | - | -        | -        |
| Amolops_gyirongensis    | - | - | - | -        | -        |
| Amolops_hainanensis     | - | - | - | -        | -        |
| Amolops_hongkongensis   | - | - | - | -        | -        |
| Amolops_indoburmanensis | - | - | - | -        | -        |
| Amolops_deng            | - | - | - | -        | -        |
| Amolops_deng            | - | - | - | -        | -        |
| Amolops_iriodes         | - | - | - | -        | -        |
| Amolops_jinjiangensis   | - | - | - | -        | -        |
| Amolops_larutensis      | - | - | - | -        | -        |
| Amolops_liangshanensis  | - | - | - | -        | -        |
| Amolops_lifanensis      | - | - | - | -        | -        |
| Amolops_loloensis       | - | - | - | -        | -        |
| Amolops_mantzorum       | - | - | - | -        | -        |
| Amolops_marmoratus      | - | - | - | -        | -        |
| Amolops_medogensis      | - | - | - | -        | -        |
| Amolops_medogensis      | - | - | - | -        | -        |
| Amolops_mengyangensis   | - | - | - | -        | -        |
| Amolops_nyingchiensis   | - | - | - | -        | -        |
| Amolops_nyingchiensis   | - | - | - | -        | -        |
| Amolops_panhai          | - | - | - | -        | -        |
| Amolops_ricketti        | - | - | - | -        | -        |
| Amolops_sp              | - | - | - | -        | -        |
| Amolops_spinapectoralis | - | - | - | -        | -        |
| Amolops_torrentis       | - | - | - | -        | -        |
| Amolops_tuberodepressus | - | - | - | -        | -        |
| Amolops_viridimaculatus | - | - | - | -        | -        |
| Amolops_vitreus         | - | - | - | -        | -        |
| Amolops_wangyufani      | - | - | - | -        | -        |
| Amolops_wangyufani      | - | - | - | -        | -        |
| Amolops_wuyiensis       | - | - | - | -        | -        |
| Amolops_yarlungzangbo   | - | - | - | -        | -        |
| Amolops_yarlungzangbo   | - | - | - | -        | -        |
| Babina_chapaensis       | - | - | - | KR264317 | KR264238 |
| Babina_okinavana        | - | - | - | -        | -        |
| Babina_pleuraden        | - | - | - | KR264303 | KR264228 |
| Chalcorana_chalconota   | - | - | - | -        | -        |
| Chalcorana_eschatia     | - | - | - | KR264326 | KR264248 |
| Chalcorana_megalonesa   | - | - | - | -        | -        |

|                            |   |          |          |          |          |
|----------------------------|---|----------|----------|----------|----------|
| Chalcorana_mocquardi       | - | -        | -        | KR264341 | KR264261 |
| Chalcorana_parvaccola      | - | -        | -        | KR264325 | KR264247 |
| Chalcorana_rufipes         | - | -        | -        | KR264324 | KR264246 |
| Clinotarsus_alticola       | - | -        | -        | -        | -        |
| Clinotarsus_curtipes       | - | -        | -        | -        | -        |
| Glandirana_emeljanovi      | - | -        | -        | -        | -        |
| Glandirana_rugosa          | - | -        | -        | -        | -        |
| Glandirana_tientaiensis    | - | -        | -        | -        | -        |
| Huia_cavitympanum          | - | -        | -        | -        | -        |
| Huia_cavitympanum          | - | -        | -        | -        | -        |
| Huia_masonii               | - | -        | -        | -        | -        |
| Huia_melasma               | - | -        | -        | -        | -        |
| Humerana_humeralis         | - | -        | -        | -        | -        |
| Humerana_miopus            | - | -        | -        | -        | -        |
| Hydrophylax_bahuvistara    | - | -        | -        | -        | -        |
| Hydrophylax_gracilis       | - | -        | -        | -        | -        |
| Hydrophylax_leptoglossa    | - | -        | -        | -        | -        |
| Hydrophylax_malabaricus    | - | -        | -        | -        | -        |
| Hylarana_attigua           | - | -        | -        | -        | -        |
| Hylarana_erythraea         | - | -        | -        | -        | -        |
| Hylarana_latouchii         | - | -        | -        | -        | -        |
| Hylarana_macroductyla      | - | -        | -        | KR264355 | KR264276 |
| Hylarana_taipehensis       | - | -        | -        | KR264285 | KR264215 |
| Hylarana_tytleri           | - | -        | -        | -        | KR264275 |
| Indosylvirana_caesari      | - | -        | -        | -        | -        |
| Indosylvirana_aurantiaca   | - | -        | -        | -        | -        |
| Indosylvirana_doni         | - | -        | -        | -        | -        |
| Indosylvirana_flavescens   | - | -        | -        | -        | -        |
| Indosylvirana_indica       | - | -        | -        | -        | -        |
| Indosylvirana_intermedia   | - | -        | -        | -        | -        |
| Indosylvirana_magna        | - | -        | -        | -        | -        |
| Indosylvirana_milleti      | - | -        | -        | -        | -        |
| Indosylvirana_montana      | - | -        | -        | -        | -        |
| Indosylvirana_serendipi    | - | -        | -        | -        | -        |
| Indosylvirana_sreeni       | - | -        | -        | -        | -        |
| Indosylvirana_temporalis   | - | -        | -        | -        | -        |
| Indosylvirana_urbis        | - | -        | -        | -        | -        |
| Meristogenys_amoropalamus  | - | AB526659 | AB526687 | -        | -        |
| Meristogenys_dyscritus     | - | AB360155 | AB526684 | -        | -        |
| Meristogenys_maryatiae     | - | AB526651 | AB526679 | -        | -        |
| Meristogenys_poecilus      | - | B526650  | AB526678 | -        | -        |
| Meristogenys_stenocephalus | - | AB526652 | AB526680 | -        | -        |
| Meristogenys_stigmachilus  | - | AB526654 | AB526682 | -        | -        |
| Odorrana_absita            | - | -        | -        | -        | -        |

|                          |   |   |   |          |          |
|--------------------------|---|---|---|----------|----------|
| Odorrana_amamiensis      | - | - | - | -        | -        |
| Odorrana_andersonii      | - | - | - | -        | -        |
| Odorrana_anlungensis     | - | - | - | -        | -        |
| Odorrana_aureola         | - | - | - | -        | -        |
| Odorrana_bacboensis      | - | - | - | -        | -        |
| Odorrana_banaorum        | - | - | - | -        | -        |
| Odorrana_chapaensis      | - | - | - | -        | -        |
| Odorrana_chloronota      | - | - | - | -        | -        |
| Odorrana_exiliversabilis | - | - | - | -        | -        |
| Odorrana_fengkaiensis    | - | - | - | -        | -        |
| Odorrana_geminata        | - | - | - | -        | -        |
| Odorrana_graminea        | - | - | - | -        | -        |
| Odorrana_hainanensis     | - | - | - | -        | -        |
| Odorrana_hejiangensis    | - | - | - | -        | -        |
| Odorrana_hosii           | - | - | - | KR264331 | KR264251 |
| Odorrana_huanggangensis  | - | - | - | -        | -        |
| Odorrana_ishikawae       | - | - | - | -        | -        |
| Odorrana_jingdongensis   | - | - | - | -        | -        |
| Odorrana_jingdongensis   | - | - | - | -        | -        |
| Odorrana_junlianensis    | - | - | - | -        | -        |
| Odorrana_kuangwuensis    | - | - | - | -        | -        |
| Odorrana_leporipes       | - | - | - | -        | -        |
| Odorrana_lipuensis       | - | - | - | -        | -        |
| Odorrana_livida          | - | - | - | -        | -        |
| Odorrana_lungshengensis  | - | - | - | -        | -        |
| Odorrana_margaretae      | - | - | - | -        | -        |
| Odorrana_morafkai        | - | - | - | -        | -        |
| Odorrana_mutschmanni     | - | - | - | -        | -        |
| Odorrana_nanjiangensis   | - | - | - | -        | -        |
| Odorrana_narina          | - | - | - | -        | -        |
| Odorrana_nasica          | - | - | - | -        | -        |
| Odorrana_nasuta          | - | - | - | -        | -        |
| Odorrana_schmackeri      | - | - | - | -        | -        |
| Odorrana_supranarina     | - | - | - | -        | -        |
| Odorrana_swinhoana       | - | - | - | -        | -        |
| Odorrana_tianmuyi        | - | - | - | -        | -        |
| Odorrana_tiannanensis    | - | - | - | -        | -        |
| Odorrana_tormota         | - | - | - | -        | -        |
| Odorrana_utsunomiyaorum  | - | - | - | -        | -        |
| Odorrana_versabilis      | - | - | - | -        | -        |
| Odorrana_wuchuanensis    | - | - | - | -        | -        |
| Odorrana_yizhangensis    | - | - | - | -        | -        |
| Papurana_daemeli         | - | - | - | KR264300 | -        |
| Papurana_arfaki          | - | - | - | KR264292 | KR264220 |

|                           |          |          |          |          |          |
|---------------------------|----------|----------|----------|----------|----------|
| Papurana_aurata           | -        | -        | -        | KR264342 | -        |
| Papurana_garritor         | -        | -        | -        | KR264286 | -        |
| Papurana_jimiensis        | -        | -        | -        | KR264297 | -        |
| Papurana_kreffti          | -        | -        | -        | KR264294 | KR264222 |
| Papurana_milneana         | -        | -        | -        | KR264288 | KR264216 |
| Papurana_papua            | -        | -        | -        | KR264298 | KR264224 |
| Papurana_supragrisea      | -        | -        | -        | KR264302 | KR264227 |
| Papurana_volkerjane       | -        | -        | -        | -        | KR264264 |
| Papurana_waliesa          | -        | -        | -        | KR264290 | KR264218 |
| Pelophylax_lateralis      | KF991301 | -        | -        | -        | -        |
| Pelophylax_nigromaculatus | KX269291 | -        | -        | -        | -        |
| Pelophylax_ridibundus     | -        | -        | -        | -        | -        |
| Pelophylax_saharicus      | -        | -        | -        | -        | -        |
| Pseudorana_weiningensis   | KX269292 | -        | -        | -        | -        |
| Pulchrana_banjarana       | -        | KF477787 | -        | -        | -        |
| Pulchrana_baramica        | -        | -        | -        | -        | -        |
| Pulchrana_glandulosa      | -        | -        | -        | -        | -        |
| Pulchrana_grandocula      | -        | -        | -        | -        | -        |
| Pulchrana_laterimaculata  | -        | -        | -        | -        | -        |
| Pulchrana_mangyanum       | -        | KF477823 | -        | -        | -        |
| Pulchrana_melanomenta     | -        | KF477830 | -        | -        | -        |
| Pulchrana_moellendorffi   | -        | -        | -        | -        | -        |
| Pulchrana_picturata       | -        | -        | -        | KR264313 | -        |
| Pulchrana_rawa            | -        | -        | -        | -        | -        |
| Pulchrana_siberu          | -        | -        | -        | -        | -        |
| Pulchrana_signata         | -        | -        | -        | -        | -        |
| Pulchrana_similis         | -        | -        | -        | KR264321 | KR264241 |
| Rana_catesbeianus         | AB612040 | AY819103 | AB777225 | AB612041 | AY819188 |
| Rana_kukunoris            | KX269260 | KX269474 | KX269702 | -        | -        |
| Rana_pipiens              | -        | -        | -        | -        | -        |
| Rana_septentrionalis      | KX269240 | KX269454 | KX269681 | -        | -        |
| Rana_temporaria           | KC800199 | KC800339 | EF107369 | EF017988 | -        |
| Rana_tlaloci              | KX269251 | KX269465 | KX269692 | -        | -        |
| Sanguirana_luzonensis     | -        | -        | -        | KR264350 | -        |
| Sanguirana_sanguinea      | -        | -        | -        | KT881648 | -        |
| Staurois_guttatus         | -        | -        | -        | -        | -        |
| Staurois_latopalmodus     | -        | -        | -        | -        | -        |
| Staurois_natator          | -        | -        | -        | -        | -        |
| Sylvirana_cubitalis       | -        | -        | -        | KR264320 | -        |
| Sylvirana_faber           | -        | -        | -        | -        | -        |
| Sylvirana_guentheri       | -        | -        | -        | KR264284 | KR264214 |
| Sylvirana_maosonensis     | -        | -        | -        | -        | -        |
| Sylvirana_mortenseni      | -        | MG606304 | -        | KR264319 | KR264240 |
| Sylvirana_nigrovittata    | -        | -        | -        | -        | -        |

|                                     |            |             |   |          |          |
|-------------------------------------|------------|-------------|---|----------|----------|
| <i>Sylvirana spinulosa</i>          | -          | -           | - | KR264336 | KR264257 |
| <b>Outgroup</b>                     |            |             |   |          |          |
| <i>Buergeria oxycephalus</i>        | KU244396   | -           | - | -        | -        |
| <i>Cacosternum magnaglandiferus</i> | -          | -           | - | -        | -        |
| <i>Conraua crassipes</i>            | -          | -           | - | KX200444 | -        |
| <i>Cornufer guentheri</i>           | -          | KP298156    | - | -        | -        |
| <i>Mantidactylus guttulatus</i>     | -          | -           | - | -        | -        |
| <i>Phrynomantis annectens</i>       | EF396025   | -           | - | -        | -        |
| <i>Odontobatrachus natator</i>      | KF693490   | -           | - | -        | -        |
| <i>Phrynodon sandersoni</i>         | -          | -           | - | -        | -        |
| <i>Ptychadena cooperi</i>           | -          | -           | - | MF078275 | -        |
| <i>Quasipaa delacouri</i>           | -          | -           | - | -        | -        |
| <i>Kurixalus verrucosus</i>         | KX554863   | -           | - | -        | -        |
| <i>Theلودerma corticale</i>         | KU244394   | -           | - | -        | -        |
| <b>Species</b>                      | <b>RH1</b> | <b>NCX1</b> |   |          |          |
| <i>Abavorana luctuosa</i>           | -          | -           |   |          |          |
| <i>Amnirana albolabris</i>          | -          | -           |   |          |          |
| <i>Amnirana amnicola</i>            | -          | -           |   |          |          |
| <i>Amnirana darlingi</i>            | -          | -           |   |          |          |
| <i>Amnirana galamensis</i>          | -          | -           |   |          |          |
| <i>Amnirana lepus</i>               | -          | -           |   |          |          |
| <i>Amnirana nicobariensis</i>       | -          | -           |   |          |          |
| <i>Amolops afghanus</i>             | -          | -           |   |          |          |
| <i>Amolops akhaorum</i>             | -          | -           |   |          |          |
| <i>Amolops albispinus</i>           | -          | -           |   |          |          |
| <i>Amolops aniqiaoensis</i>         | -          | -           |   |          |          |
| <i>Amolops aniqiaoensis</i>         | -          | -           |   |          |          |
| <i>Amolops archotaphus</i>          | -          | -           |   |          |          |
| <i>Amolops beibengensis</i>         | -          | -           |   |          |          |
| <i>Amolops bellulus</i>             | -          | -           |   |          |          |
| <i>Amolops chayuensis</i>           | -          | -           |   |          |          |
| <i>Amolops chunganensis</i>         | -          | -           |   |          |          |
| <i>Amolops compotrix</i>            | -          | -           |   |          |          |
| <i>Amolops cremnobatus</i>          | -          | -           |   |          |          |
| <i>Amolops cucae</i>                | -          | -           |   |          |          |
| <i>Amolops daiyunensis</i>          | -          | -           |   |          |          |
| <i>Amolops daorum</i>               | -          | -           |   |          |          |
| <i>Amolops granulosus</i>           | -          | -           |   |          |          |
| <i>Amolops gyirongensis</i>         | -          | -           |   |          |          |
| <i>Amolops gyirongensis</i>         | -          | -           |   |          |          |
| <i>Amolops hainanensis</i>          | -          | -           |   |          |          |
| <i>Amolops hongkongensis</i>        | -          | -           |   |          |          |
| <i>Amolops indoburmanensis</i>      | -          | -           |   |          |          |
| <i>Amolops deng</i>                 | -          | -           |   |          |          |

|                         |   |   |
|-------------------------|---|---|
| Amolops_deng            | - | - |
| Amolops_iriodes         | - | - |
| Amolops_jinjiangensis   | - | - |
| Amolops_larutensis      | - | - |
| Amolops_liangshanensis  | - | - |
| Amolops_lifanensis      | - | - |
| Amolops_loloensis       | - | - |
| Amolops_mantzorum       | - | - |
| Amolops_marmoratus      | - | - |
| Amolops_medogensis      | - | - |
| Amolops_medogensis      | - | - |
| Amolops_mengyangensis   | - | - |
| Amolops_nyingchiensis   | - | - |
| Amolops_nyingchiensis   | - | - |
| Amolops_panghai         | - | - |
| Amolops_ricketti        | - | - |
| Amolops_sp              | - | - |
| Amolops_spinapectoralis | - | - |
| Amolops_torrentis       | - | - |
| Amolops_tuberodepressus | - | - |
| Amolops_viridimaculatus | - | - |
| Amolops_vitreus         | - | - |
| Amolops_wangyufani      | - | - |
| Amolops_wangyufani      | - | - |
| Amolops_wuyiensis       | - | - |
| Amolops_yarlungzangbo   | - | - |
| Amolops_yarlungzangbo   | - | - |
| Babina_chapaensis       | - | - |
| Babina_okinavana        | - | - |
| Babina_pleuraden        | - | - |
| Chalcorana_chalconota   | - | - |
| Chalcorana_eschatia     | - | - |
| Chalcorana_megalonesa   | - | - |
| Chalcorana_mocquardi    | - | - |
| Chalcorana_parvaccola   | - | - |
| Chalcorana_rufipes      | - | - |
| Clinotarsus_alticola    | - | - |
| Clinotarsus_curtipes    | - | - |
| Glandirana_emeljanovi   | - | - |
| Glandirana_rugosa       | - | - |
| Glandirana_tientaiensis | - | - |
| Huia_cavitympanum       | - | - |
| Huia_cavitympanum       | - | - |
| Huia_masonii            | - | - |

|                            |          |          |
|----------------------------|----------|----------|
| Huia_melasma               | -        | -        |
| Humerana_humeralis         | -        | -        |
| Humerana_miopus            | -        | -        |
| Hydrophylax_bahuvistara    | -        | -        |
| Hydrophylax_gracilis       | -        | -        |
| Hydrophylax_leptoglossa    | -        | -        |
| Hydrophylax_malabaricus    | -        | -        |
| Hylarana_attigua           | -        | -        |
| Hylarana_erythraea         | -        | -        |
| Hylarana_latouchii         | -        | -        |
| Hylarana_macroductyla      | -        | -        |
| Hylarana_taipehensis       | -        | -        |
| Hylarana_tytleri           | -        | -        |
| Indosylvirana_caesari      | -        | -        |
| Indosylvirana_aurantiaca   | -        | -        |
| Indosylvirana_doni         | -        | -        |
| Indosylvirana_flavescens   | -        | -        |
| Indosylvirana_indica       | -        | -        |
| Indosylvirana_intermedia   | -        | -        |
| Indosylvirana_magna        | -        | -        |
| Indosylvirana_milleti      | -        | -        |
| Indosylvirana_montana      | -        | -        |
| Indosylvirana_serendipi    | -        | -        |
| Indosylvirana_sreeni       | -        | -        |
| Indosylvirana_temporalis   | -        | -        |
| Indosylvirana_urbis        | -        | -        |
| Meristogenys_amoropalamus  | AB526701 | AB526645 |
| Meristogenys_dyscritus     | AB526698 | AB526642 |
| Meristogenys_maryatiae     | AB526693 | AB526637 |
| Meristogenys_poecilus      | AB526692 | AB526636 |
| Meristogenys_stenocephalus | AB526694 | AB526638 |
| Meristogenys_stigmachilus  | AB526696 | AB526640 |
| Odorrana_absita            | -        | -        |
| Odorrana_amamiensis        | -        | -        |
| Odorrana_andersonii        | -        | -        |
| Odorrana_anlungensis       | -        | -        |
| Odorrana_aureola           | -        | -        |
| Odorrana_bacboensis        | -        | -        |
| Odorrana_banaorum          | -        | -        |
| Odorrana_chapaensis        | -        | -        |
| Odorrana_chloronota        | -        | -        |
| Odorrana_exiliversabilis   | -        | -        |
| Odorrana_fengkaiensis      | -        | -        |
| Odorrana_geminata          | -        | -        |

|                           |   |   |
|---------------------------|---|---|
| Odorrana_graminea         | - | - |
| Odorrana_hainanensis      | - | - |
| Odorrana_hejiangensis     | - | - |
| Odorrana_hosii            | - | - |
| Odorrana_huanggangensis   | - | - |
| Odorrana_ishikawae        | - | - |
| Odorrana_jingdongensis    | - | - |
| Odorrana_jingdongensis    | - | - |
| Odorrana_junlianensis     | - | - |
| Odorrana_kuangwuensis     | - | - |
| Odorrana_leporipes        | - | - |
| Odorrana_lipuensis        | - | - |
| Odorrana_livida           | - | - |
| Odorrana_lungshengensis   | - | - |
| Odorrana_margaretae       | - | - |
| Odorrana_morafkai         | - | - |
| Odorrana_mutschmanni      | - | - |
| Odorrana_nanjiangensis    | - | - |
| Odorrana_narina           | - | - |
| Odorrana_nasica           | - | - |
| Odorrana_nasuta           | - | - |
| Odorrana_schmackeri       | - | - |
| Odorrana_supranarina      | - | - |
| Odorrana_swinhoana        | - | - |
| Odorrana_tianmuyi         | - | - |
| Odorrana_tiannanensis     | - | - |
| Odorrana_tormota          | - | - |
| Odorrana_utsunomiyaorum   | - | - |
| Odorrana_versabilis       | - | - |
| Odorrana_wuchuanensis     | - | - |
| Odorrana_yizhangensis     | - | - |
| Papurana_daemeli          | - | - |
| Papurana_arfaki           | - | - |
| Papurana_aurata           | - | - |
| Papurana_garritor         | - | - |
| Papurana_jimiensis        | - | - |
| Papurana_kreffti          | - | - |
| Papurana_milneana         | - | - |
| Papurana_papua            | - | - |
| Papurana_supragrisea      | - | - |
| Papurana_volkerjane       | - | - |
| Papurana_waliesa          | - | - |
| Pelophylax_lateralis      | - | - |
| Pelophylax_nigromaculatus | - | - |



|                              |   |          |
|------------------------------|---|----------|
| Pelophylax_ridibundus        | - | -        |
| Pelophylax_saharicus         | - | -        |
| Pseudorana_weiningensis      | - | -        |
| Pulchrana_banjarana          | - | -        |
| Pulchrana_baramica           | - | -        |
| Pulchrana_glandulosa         | - | -        |
| Pulchrana_grandocula         | - | -        |
| Pulchrana_laterimaculata     | - | -        |
| Pulchrana_mangyanum          | - | -        |
| Pulchrana_melanomenta        | - | -        |
| Pulchrana_moellendorffi      | - | -        |
| Pulchrana_picturata          | - | -        |
| Pulchrana_rawa               | - | -        |
| Pulchrana_siberu             | - | -        |
| Pulchrana_signata            | - | -        |
| Pulchrana_similis            | - | -        |
| Rana_catesbeianus            | - | AB612042 |
| Rana_kukunoris               | - | -        |
| Rana_pipiens                 | - | -        |
| Rana_septentrionalis         | - | -        |
| Rana_temporaria              | - | EF018012 |
| Rana_tlaloci                 | - | -        |
| Sanguirana_luzonensis        | - | -        |
| Sanguirana_sanguinea         | - | -        |
| Staurois_guttatus            | - | -        |
| Staurois_latopalmatum        | - | -        |
| Staurois_natator             | - | -        |
| Sylvirana_cubitalis          | - | -        |
| Sylvirana_faber              | - | -        |
| Sylvirana_guentheri          | - | -        |
| Sylvirana_maosonensis        | - | -        |
| Sylvirana_mortenseni         | - | MG605971 |
| Sylvirana_nigrovittata       | - | -        |
| Sylvirana_spinulosa          | - | -        |
| <b>Outgroup</b>              |   |          |
| Buergeria_oxycephalus        | - | -        |
| Cacosternum_magnaglandiferus | - | -        |
| Conraua_crassipes            | - | EF018016 |
| Cornufer_guentheri           | - | AY948830 |
| Mantidactylus_guttulatus     | - | -        |
| Phrynomantis_annectens       | - | -        |
| Odontobatrachus_natator      | - | -        |
| Phrynodon_sandersoni         | - | -        |
| Ptychadena_cooperi           | - | MF078178 |

|                      |   |   |
|----------------------|---|---|
| Quasipaa_delacouri   | - | - |
| Kurixalus_verrucosus | - | - |
| Theلودerma_corticale | - | - |

---

## Rhacophoridae

| Species                      | ND1 | COI      | 12s      | 16s             | Cytb     |
|------------------------------|-----|----------|----------|-----------------|----------|
| Ghatixalus_asterops          | -   | -        | EU178098 | EU178091        | -        |
| Ghatixalus_variabilis        | -   | -        | KU170006 | KU169981        | -        |
| Ghatixalus_magnus            | -   | -        | KT359618 | KT359624        | -        |
| Mercurana_myristicapalustris | -   | -        | KC594293 | KC594294        | -        |
| Nasutixalus_jerdonii         | -   | -        | KU230457 | KU170001        | -        |
| Nasutixalus_medogensis       | -   | -        | GQ285679 | GQ285679        | -        |
| Beddomixalus_bijui           | -   | -        | KC594289 | KC594290        | -        |
| Taruga_eques                 | -   | -        | AY141800 | GQ204689        | GQ204505 |
| Taruga_fastigo               | -   | -        | AY141802 | GQ204690        | GQ204506 |
| Taruga_longinasus            | -   | -        | GQ204745 | GQ204691        | GQ204507 |
| Nyctixalus_margaritifer      | -   | -        | EU178094 | EU178087        | -        |
| Nyctixalus_pictus            | -   | KU244454 | GQ204783 | GQ204732        | GQ204549 |
| Nyctixalus_spinosus          | -   | -        | DQ283114 | DQ283114        | -        |
| Feihyla_kajau                | -   | -        | KC961241 | KC961088        | -        |
| Feihyla_palpebralis          | -   | KP996795 | EU215546 | EU215546        | -        |
| Feihyla_vittatus             | -   | -        | GQ285684 | <b>MW019898</b> | EU924596 |
| Feihyla_hansena              | -   | KR087645 | AY880579 | AY880493        | -        |
| Buergeria_buergeri           | -   | -        | AB127977 | AB127977        | AB127977 |
| Buergeria_japonica           | -   | -        | AF458123 | AF458123        | MF536335 |
| Buergeria_oxycephala         | -   | -        | EU215524 | EU215524        | GQ204547 |
| Buergeria_robusta            | -   | -        | AF458125 | AF458125        | -        |
| Liuixalus_calcarius          | -   | -        | -        | AB871420        | -        |
| Liuixalus_feii               | -   | -        | -        | KT198731        | -        |
| Liuixalus_hainanus           | -   | -        | GQ285671 | GQ285671        | -        |
| Liuixalus_ocellatus          | -   | KP996840 | -        | AB871416        | -        |
| Liuixalus_romeri             | -   | KP996831 | -        | KT192636        | -        |
| Liuixalus_shiwandashan       | -   | -        | EU215528 | EU215528        | -        |
| Gracixalus_gracilipes        | -   | KR087671 | GQ285668 | GQ285668        | EU924593 |
| Gracixalus_jinxiuensis       | -   | -        | EU215525 | EU215525        | EU924599 |
| Gracixalus_jinggangensis     | -   | -        | -        | KY624587        | -        |
| Gracixalus_nonggangensis     | -   | -        | -        | JX841320        | -        |
| Gracixalus_waza              | -   | -        | -        | JX896682        | -        |
| Gracixalus_seesom            | -   | -        | -        | LC011934        | -        |
| Gracixalus_sapaensis         | -   | -        | GQ285670 | GQ285670        | -        |
| Gracixalus_quangi            | -   | -        | -        | JN862538        | -        |
| Gracixalus_supercornutus     | -   | -        | -        | JN862543        | -        |
| Gracixalus_lumarius          | -   | -        | -        | KF918412        | -        |
| Gracixalus_quyeti            | -   | -        | -        | EU871429        | -        |
| Gracixalus_medogensis        | -   | -        | -        | <b>MW023606</b> | -        |
| Kurixalus_appendiculatus     | -   | -        | KC961247 | KC961090        | KF933134 |
| Kurixalus_baliogaster        | -   | -        | AB933301 | AB933301        | -        |

|                            |   |          |                 |                 |          |
|----------------------------|---|----------|-----------------|-----------------|----------|
| Kurixalus_banaensis        | - | -        | GQ285667        | GQ285667        | -        |
| Kurixalus_berylliniris     | - | DQ468677 | -               | DQ468669        | -        |
| Kurixalus_bisacculus       | - | -        | EU215548        | EU215548        | -        |
| Kurixalus_eiffingeri       | - | DQ468680 | -               | DQ468672        | -        |
| Kurixalus_idiotoocus       | - | KT259131 | EU215547        | EU215547        | GQ204503 |
| Kurixalus_motokawai        | - | -        | -               | LC002890        | -        |
| Kurixalus_naso             | - | -        | <b>MW111527</b> | <b>MW111527</b> | -        |
| Kurixalus_naso             | - | -        | <b>MW111528</b> | <b>MW111528</b> | -        |
| Kurixalus_odontotarsus     | - | KR087747 | EU215549        | EU215549        | -        |
| Kurixalus_verrucosus       | - | -        | GU227274        | GU227329        | -        |
| Kurixalus_viridescens      | - | -        | -               | AB933285        | -        |
| Kurixalus_wangi            | - | DQ468679 | -               | DQ468671        | -        |
| Chiromantis_doriae         | - | KR087627 | EF564444        | EF564516        | EU924595 |
| Chiromantis_nongkhorensis  | - | KR087635 | GQ204774        | GQ204723        | GQ204540 |
| Chiromantis_petersii       | - | -        | GQ204784        | GQ204733        | GQ204550 |
| Chiromantis_rufescens      | - | -        | GQ204775        | GQ204724        | GQ204541 |
| Chiromantis_xerampelina    | - | -        | GQ204785        | AY880495        | GQ204551 |
| Polypedates_braueri        | - | KR087858 | MN511823        | MN511823        | AB451722 |
| Polypedates_colletti       | - | -        | AB728189        | AB728189        | GQ204514 |
| Polypedates_cruciger       | - | -        | AY141799        | GQ204687        | GQ204504 |
| Polypedates_discantus      | - | -        | AB728180        | AB728180        | -        |
| Polypedates_impresus       | - | -        | AB728174        | AB728174        | -        |
| Polypedates_leucomystax    | - | KR087872 | AB728137        | AB728137        | GQ204509 |
| Polypedates_macrotis       | - | -        | AB728187        | AB728187        | -        |
| Polypedates_maculatus      | - | -        | AB728188        | AB728188        | -        |
| Polypedates_megacephalus   | - | KR087886 | MN511821        | MN511821        | -        |
| Polypedates_mutus          | - | -        | MN511837        | MN511837        | -        |
| Polypedates_otilophus      | - | -        | AB728190        | AB728190        | GQ204513 |
| Polypedates_pseudocruciger | - | -        | KU170009        | EU450009        | -        |
| Polypedates_teraiensis     | - | -        | -               | AB530516        | -        |
| Theلودerma_albopunctatum   | - | KU244441 | GQ285677        | GQ285677        | -        |
| Theلودerma_annae           | - | -        | -               | LC168170        | -        |
| Theلودerma_asperum         | - | -        | GQ204776        | GQ204725        | GQ204542 |
| Theلودerma_baibungensis    | - | -        | KU981089        | KU981089        | -        |
| Theلودerma_baibungensis    | - | -        | <b>MW111523</b> | <b>MW111523</b> | -        |
| Theلودerma_bicolor         | - | -        | KF991263        | JX046475        | KF991324 |
| Theلودerma_corticale       | - | KU244452 | -               | KU244364        | -        |
| Theلودerma_gordoni         | - | KU244451 | -               | KU244363        | -        |
| Theلودerma_horridum        | - | -        | LC012861        | LC012861        | -        |
| Theلودerma_lacustrinum     | - | -        | -               | KX095245        | -        |
| Theلودerma_laeve           | - | -        | KT461897        | KT461898        | -        |
| Theلودerma_lateriticum     | - | -        | LC012850        | LC012850        | -        |
| Theلودerma_leporosum       | - | -        | AB847128        | AB847128        | -        |
| Theلودerma_licin           | - | KU244447 | -               | KU244368        | -        |

|                                   |          |          |                 |                 |          |
|-----------------------------------|----------|----------|-----------------|-----------------|----------|
| <i>Theلودerma_moloch</i>          | -        | -        | <b>MW111524</b> | <b>MW111524</b> | -        |
| <i>Theلودerma_nebulosum</i>       | -        | -        | -               | JN688168        | -        |
| <i>Theلودerma_palliatum</i>       | -        | -        | KT461893        | KT461901        | -        |
| <i>Theلودerma_phrynoderma</i>     | -        | KU244448 | KJ128280        | KJ128282        | -        |
| <i>Theلودerma_pyaukkya</i>        | -        | KU244443 | -               | KU244361        | -        |
| <i>Theلودerma_rhododiscus</i>     | -        | -        | DQ283392        | DQ283393        | -        |
| <i>Theلودerma_ryabovi</i>         | -        | -        | LC012860        | LC012860        | -        |
| <i>Theلودerma_stellatum</i>       | -        | -        | -               | KT461917        | -        |
| <i>Theلودerma_truongsonense</i>   | -        | -        | -               | KT461925        | -        |
| <i>Theلودerma_vietnamense</i>     | -        | -        | -               | KU561887        | -        |
| <i>Theلودerma_petilum</i>         | -        | -        | KJ802925        | KJ802925        | -        |
| <i>Raorchestes_agasthyaensis</i>  | JX092859 | -        | -               | JX092723        | JX092785 |
| <i>Raorchestes_akroparallagi</i>  | -        | -        | JX092726        | JX092650        | JX092786 |
| <i>Raorchestes_anili</i>          | JX092863 | KM052268 | JX092729        | JX092700        | JX092790 |
| <i>Raorchestes_archeos</i>        | JX092862 | -        | -               | JX092675        | JX092789 |
| <i>Raorchestes_aureus</i>         | JX092882 | -        | JX092745        | JX092672        | JX092811 |
| <i>Raorchestes_beddomii</i>       | EU450034 | -        | JX092731        | JX092653        | JX092793 |
| <i>Raorchestes_blandus</i>        | JX092854 | -        | JX092725        | JX092660        | JX092781 |
| <i>Raorchestes_bobingeri</i>      | EU450049 | -        | JX092733        | JX092680        | JX092795 |
| <i>Raorchestes_bombayensis</i>    | EU450054 | -        | -               | JX092657        | JX092796 |
| <i>Raorchestes_chalazodes</i>     | JX092869 | -        | JX092734        | JX092676        | -        |
| <i>Raorchestes_charius</i>        | JX092870 | -        | JX092736        | JX092691        | JX092799 |
| <i>Raorchestes_chlorosomma</i>    | EU450052 | -        | -               | EU450017        | -        |
| <i>Raorchestes_chotta</i>         | EU450056 | -        | JX092737        | JX092656        | JX092800 |
| <i>Raorchestes_chromasynchysi</i> | JX092872 | -        | JX092738        | JX092667        | JX092802 |
| <i>Raorchestes_coonoorensis</i>   | EU450035 | -        | JX092740        | JX092716        | JX092805 |
| <i>Raorchestes_crustai</i>        | JX092877 | -        | JX092742        | JX092677        | JX092806 |
| <i>Raorchestes_dubois</i>         | EU450032 | -        | -               | JX092668        | JX092808 |
| <i>Raorchestes_echinatus</i>      | -        | -        | -               | JX092696        | JX092839 |
| <i>Raorchestes_flaviocularis</i>  | JX092880 | -        | -               | JX092682        | JX092809 |
| <i>Raorchestes_flaviventris</i>   | JX092884 | -        | JX092746        | JX092694        | JX092813 |
| <i>Raorchestes_ghatei</i>         | -        | -        | -               | KF366386        | -        |
| <i>Raorchestes_glandulosus</i>    | EU450042 | -        | JX092744        | JX092665        | JX092810 |
| <i>Raorchestes_graminirupes</i>   | EU450050 | -        | JX092772        | JX092649        | JX092812 |
| <i>Raorchestes_griet</i>          | EU450033 | -        | -               | JX092654        | JX092814 |
| <i>Raorchestes_gryllus</i>        | -        | -        | GQ285674        | GQ285674        | -        |
| <i>Raorchestes_hassanensis</i>    | -        | -        | JX092748        | JX092673        | JX092815 |
| <i>Raorchestes_honnametti</i>     | KT151653 | -        | -               | KT151651        | -        |
| <i>Raorchestes_indigo</i>         | JX092886 | -        | JX092749        | JX092678        | -        |
| <i>Raorchestes_jayarami</i>       | EU450057 | -        | JX092750        | JX092686        | JX092816 |
| <i>Raorchestes_johnceei</i>       | JX092888 | -        | JX092751        | JX092679        | JX092817 |
| <i>Raorchestes_kadalarensis</i>   | JX092889 | -        | -               | JX092701        | JX092818 |
| <i>Raorchestes_kaikatti</i>       | EU450055 | -        | JX092752        | JX092718        | JX092822 |
| <i>Raorchestes_kakachi</i>        | JX092912 | -        | JX092765        | JX092695        | JX092843 |

|                                |                 |          |          |                 |          |
|--------------------------------|-----------------|----------|----------|-----------------|----------|
| Raorchestes_lechiya            | -               | -        | -        | KT359623        | -        |
| Raorchestes_leucolatus         | JX092908        | -        | -        | JX092669        | JX092838 |
| Raorchestes_longchuanensis     | <b>MW111462</b> | -        | GQ285675 | <b>MW019899</b> | -        |
| Raorchestes_luteolus           | EU450041        | -        | JX092756 | JX092659        | JX092823 |
| Raorchestes_manohari           | JX092895        | -        | -        | JX092674        | JX092824 |
| Raorchestes_markii             | EU450060        | -        | JX092757 | JX092719        | JX092825 |
| Raorchestes_menglaensis        | <b>MW111463</b> | -        | GQ285676 | <b>MW019900</b> | -        |
| Raorchestes_munnarensis        | JX092899        | -        | -        | JX092655        | JX092828 |
| Raorchestes_nerostagona        | JX092900        | -        | JX092760 | JX092661        | JX092830 |
| Raorchestes_ochlandrae         | JX092902        | -        | JX092743 | JX092666        | JX092831 |
| Raorchestes_parvulus           | <b>MW149296</b> | KR087901 | -        | <b>MW019901</b> | -        |
| Raorchestes_ponmudi            | EU450047        | -        | JX092762 | JX092651        | JX092832 |
| Raorchestes_primarrumpfi       | JX092904        | -        | -        | JX092717        | JX092833 |
| Raorchestes_resplendens        | JX092905        | -        | -        | JX092683        | JX092835 |
| Raorchestes_signatus           | EU450036        | -        | KU170011 | KU169986        | JX092836 |
| Raorchestes_silentvalley       | -               | -        | -        | KT359629        | -        |
| Raorchestes_sushili            | EU450059        | -        | JX092766 | JX092684        | JX092844 |
| Raorchestes_theuerkaufi        | JX092914        | -        | JX092767 | JX092693        | JX092845 |
| Raorchestes_tinniensi          | EU450037        | -        | -        | JX092715        | JX092846 |
| Raorchestes_travancoricus      | EU450061        | -        | JX092776 | JX092721        | JX092847 |
| Raorchestes_tuberohumerus      | EU450040        | -        | -        | EU450004        | JX092848 |
| Raorchestes_uthamani           | JX092918        | -        | -        | JX092722        | JX092849 |
| Pseudophilautus_kani           | JX092892        | -        | JX092754 | JX092724        | JX092820 |
| Pseudophilautus_alto           | -               | -        | GQ204738 | GQ204677        | GQ204494 |
| Pseudophilautus_amboli         | -               | KM052264 | JX092727 | JX092658        | JX092787 |
| Pseudophilautus_asankai        | -               | -        | FJ788141 | FJ788160        | -        |
| Pseudophilautus_bambaradeniyai | -               | -        | -        | KP272047        | -        |
| Pseudophilautus_cavirostris    | -               | -        | GQ204737 | GQ204676        | GQ204493 |
| Pseudophilautus_decoris        | -               | -        | FJ788144 | FJ788163        | -        |
| Pseudophilautus_dilmah         | -               | -        | -        | KP272046        | -        |
| Pseudophilautus_folicola       | -               | -        | -        | GQ204680        | GQ204497 |
| Pseudophilautus_hankeni        | -               | -        | GU593346 | GU593348        | -        |
| Pseudophilautus_hoffmanni      | -               | -        | FJ788142 | FJ788161        | -        |
| Pseudophilautus_leucorhinus    | -               | -        | AY763796 | AY753559        | -        |
| Pseudophilautus_limbus         | -               | -        | AY141779 | GQ204668        | GQ204485 |
| Pseudophilautus_lunatus        | -               | -        | FJ788150 | GQ204675        | GQ204492 |
| Pseudophilautus_microtympanum  | -               | -        | GQ204739 | GQ204678        | GQ204495 |
| Pseudophilautus_mittermeieri   | -               | -        | GQ204741 | GQ204681        | GQ204498 |
| Pseudophilautus_mooreorum      | -               | -        | FJ788134 | FJ788153        | -        |
| Pseudophilautus_ocularis       | -               | -        | FJ788145 | FJ788164        | -        |
| Pseudophilautus_papillosus     | -               | -        | FJ788151 | FJ788170        | -        |
| Pseudophilautus_pleurotaenia   | -               | -        | FJ788146 | FJ788165        | -        |
| Pseudophilautus_poppiae        | -               | -        | FJ788136 | GQ204670        | GQ204487 |
| Pseudophilautus_popularis      | -               | -        | FJ788149 | FJ788168        | -        |

|                                    |          |          |          |          |          |
|------------------------------------|----------|----------|----------|----------|----------|
| <i>Pseudophilautus_sarasinorum</i> | -        | -        | AY141761 | GQ204667 | GQ204484 |
| <i>Pseudophilautus_schmarda</i>    | -        | -        | AY141780 | GQ204669 | GQ204486 |
| <i>Pseudophilautus_schneideri</i>  | -        | -        | GU593345 | GU593347 | -        |
| <i>Pseudophilautus_simba</i>       | -        | -        | GQ204740 | GQ204679 | GQ204496 |
| <i>Pseudophilautus_steineri</i>    | -        | -        | FJ788138 | FJ788157 | -        |
| <i>Pseudophilautus_stellatus</i>   | -        | -        | JN862535 | JN862536 | -        |
| <i>Pseudophilautus_stuarti</i>     | -        | -        | GQ204735 | GQ204672 | GQ204489 |
| <i>Pseudophilautus_tanu</i>        | -        | -        | FJ788152 | FJ788171 | -        |
| <i>Pseudophilautus_wynaadensis</i> | JX092920 | KM052269 | KU170008 | KU169983 | JX092850 |
| <i>Pseudophilautus_zorro</i>       | -        | -        | FJ788147 | GQ204671 | GQ204488 |
| <i>Philautus_abditus</i>           | -        | -        | GQ285673 | GQ285673 | GQ204526 |
| <i>Philautus_acutirostris</i>      | -        | -        | AF458137 | AF458137 | -        |
| <i>Philautus_acutus</i>            | -        | -        | JN705337 | JN705366 | -        |
| <i>Philautus_amoenus</i>           | -        | -        | KC961236 | KC961076 | -        |
| <i>Philautus_aurantium</i>         | -        | -        | GQ204756 | GQ204705 | GQ204522 |
| <i>Philautus_aurifasciatus</i>     | -        | -        | AY141804 | AY141850 | -        |
| <i>Philautus_bunitus</i>           | -        | -        | JN705339 | JN705368 | -        |
| <i>Philautus_cornutus</i>          | -        | -        | -        | KY435421 | -        |
| <i>Philautus_davidlabangi</i>      | -        | -        | JN705356 | JN705386 | -        |
| <i>Philautus_disgregus</i>         | -        | -        | KC961250 | KC961077 | GQ204521 |
| <i>Philautus_everetti</i>          | -        | -        | -        | JN705377 | -        |
| <i>Philautus_hosii</i>             | -        | -        | JN705353 | JN705384 | -        |
| <i>Philautus_ingeri</i>            | -        | -        | JN705354 | JN705385 | GQ204523 |
| <i>Philautus_juliandringi</i>      | -        | -        | JN705347 | JN705378 | -        |
| <i>Philautus_kakipanjang</i>       | -        | -        | -        | KF240718 | -        |
| <i>Philautus_kerangae</i>          | -        | -        | KC961238 | KC961079 | -        |
| <i>Philautus_macroscelis</i>       | -        | -        | JN705346 | JN705375 | -        |
| <i>Philautus_mjobergi</i>          | -        | -        | JN705349 | JN705380 | -        |
| <i>Philautus_nephophilus</i>       | -        | -        | -        | KT445970 | -        |
| <i>Philautus_petersi</i>           | -        | -        | JN705350 | JN705381 | -        |
| <i>Philautus_refugii</i>           | -        | -        | JN705351 | JN705382 | -        |
| <i>Philautus_surdus</i>            | -        | -        | AF458138 | AF458138 | -        |
| <i>Philautus_tectus</i>            | -        | -        | JN705340 | JN705369 | -        |
| <i>Philautus_umbra</i>             | -        | -        | JN705348 | JN705379 | -        |
| <i>Philautus_vermiculatus</i>      | -        | -        | -        | KY435439 | -        |
| <i>Philautus_worcesteri</i>        | -        | -        | GQ204758 | GQ204707 | GQ204524 |
| <i>Rhacophorus_achantharrhena</i>  | MF066239 | MF066239 | MF066239 | MF066239 | MF066239 |
| <i>Rhacophorus_angulirostris</i>   | -        | -        | JN705322 | JN377348 | -        |
| <i>Rhacophorus_annamensis</i>      | -        | -        | GQ204768 | GQ204717 | GQ204534 |
| <i>Rhacophorus_arboreus</i>        | -        | -        | -        | AY880523 | -        |
| <i>Rhacophorus_baluensis</i>       | -        | -        | KC961239 | KC961089 | -        |
| <i>Rhacophorus_belalongensis</i>   | -        | -        | JN705324 | JN377352 | -        |
| <i>Rhacophorus_bengkuluensis</i>   | -        | -        | -        | KM212948 | -        |
| <i>Rhacophorus_bimaculatus</i>     | -        | -        | KF933261 | -        | KF933141 |

|                               |          |          |                 |                 |          |
|-------------------------------|----------|----------|-----------------|-----------------|----------|
| Rhacophorus_bipunctatus       | -        | -        | <b>MW111517</b> | <b>MW111517</b> | -        |
| Rhacophorus_bipunctatus       | -        | -        | <b>MW111518</b> | <b>MW111518</b> | -        |
| Rhacophorus_borneensis        | -        | -        | AB781693        | AB781693        | -        |
| Rhacophorus_burmanus          | -        | -        | <b>MW111519</b> | <b>MW111519</b> | -        |
| Rhacophorus_burmanus          | -        | -        | <b>MW111520</b> | <b>MW111520</b> | -        |
| Rhacophorus_calcanus          | -        | -        | -               | LC010570        | -        |
| Rhacophorus_catamitus         | -        | -        | -               | JF748387        | -        |
| Rhacophorus_chenfui           | -        | -        | GQ204763        | GQ204712        | GQ204529 |
| Rhacophorus_cyanopunctatus    | -        | -        | KC961249        | KC961084        | -        |
| Rhacophorus_dennysi           | KT191129 | KT191129 | EF564467        | EF564539        | EU924604 |
| Rhacophorus_dorsoviridis      | -        | -        | EF564490        | EF564562        | EU924610 |
| Rhacophorus_duboisii          | -        | -        | EF564495        | EF564567        | EU924613 |
| Rhacophorus_dugritei          | -        | -        | EU215541        | EU215541        | -        |
| Rhacophorus_dulitensis        | -        | -        | JN705326        | JX219434        | -        |
| Rhacophorus_exechopygus       | -        | -        | -               | LC010586        | -        |
| Rhacophorus_fasciatus         | -        | -        | JN705331        | JN377357        | -        |
| Rhacophorus_feae              | -        | -        | EF564474        | EF564546        | EU924606 |
| Rhacophorus_gadingensis       | -        | -        | KC961242        | KC961087        | -        |
| Rhacophorus_gauni             | -        | -        | JN705325        | JN377351        | -        |
| Rhacophorus_harrissoni        | -        | -        | JN705332        | JN377359        | -        |
| Rhacophorus_helenae           | -        | -        | -               | KX139177        | -        |
| Rhacophorus_hongchibaensis    | -        | -        | JN688883        | JN688883        | -        |
| Rhacophorus_hui               | -        | -        | EU924627        | EU924622        | EU924607 |
| Rhacophorus_hungfuensis       | -        | -        | EU215538        | EU215538        | -        |
| Rhacophorus_indonesiensis     | -        | -        | -               | AB983368        | -        |
| Rhacophorus_kio               | -        | KR087904 | EU215532        | EU215532        | -        |
| Rhacophorus_lateralis         | -        | -        | AY880612        | AY880525        | -        |
| Rhacophorus_malabaricus       | -        | -        | KU170014        | AY948724        | -        |
| Rhacophorus_smaragdinus       | -        | -        | JX219411        | JX219411        | -        |
| Rhacophorus_minimus           | -        | -        | EF564489        | EF564561        | EU924609 |
| Rhacophorus_moltrechti        | -        | DQ468684 | EU215543        | EU215543        | -        |
| Rhacophorus_monticola         | -        | -        | AY326060        | AY326060        | -        |
| Rhacophorus_nigropalmatus     | -        | -        | GQ204761        | GQ204710        | GQ204527 |
| Rhacophorus_nigropunctatus    | -        | -        | EU215533        | EU215533        | EU924611 |
| Rhacophorus_norhayatii        | -        | -        | AB728191        | AB728191        | -        |
| Rhacophorus_omeimontis        | -        | -        | EF564492        | EF564564        | EU924612 |
| Rhacophorus_orlovi            | -        | -        | DQ283049        | DQ283049        | -        |
| Rhacophorus_pardalis          | -        | -        | GQ204762        | GQ204711        | GQ204528 |
| Rhacophorus_penanorum         | -        | -        | JN705323        | JN377349        | -        |
| Rhacophorus_pinglongensis     | -        | -        | KU170683        | KU170683        | -        |
| Rhacophorus_poecilonotus      | MF066240 | MF066240 | MF066240        | MF066240        | MF066240 |
| Rhacophorus_pseudomalabaricus | -        | -        | -               | KC593855        | -        |
| Rhacophorus_puerensis         | -        | -        | EF564469        | EF564541        | EU924605 |
| Rhacophorus_reinwardti        | -        | -        | GQ204771        | GQ204720        | GQ204537 |



|                           |           |           |                 |                 |           |
|---------------------------|-----------|-----------|-----------------|-----------------|-----------|
| Rhacophorus_rhodopus      | -         | KR087912  | EF564500        | EF564572        | EU924616  |
| Rhacophorus_bipunctatus   | -         | -         | EF564507        | EF564579        | -         |
| Rhacophorus_rhodopus      | -         | -         | AY843750        | AY843750        | -         |
| Rhacophorus_robertingeri  | -         | -         | -               | LC010615        | -         |
| Rhacophorus_rufipes       | -         | -         | JN705334        | JN377360        | -         |
| Rhacophorus_schlegelii    | NC_007178 | NC_007178 | NC_007178       | NC_007178       | NC_007178 |
| Rhacophorus_translineatus | -         | -         | <b>MW111521</b> | <b>MW111521</b> | -         |
| Rhacophorus_vampyrus      | -         | -         | -               | HQ656815        | -         |
| Rhacophorus_tuberculatus  | -         | -         | <b>MW111522</b> | <b>MW111522</b> | -         |
| Rhacophorus_wui           | -         | -         | JN688881        | JN688881        | -         |
| Rhacophorus_zhoukaiyae    | -         | -         | KU601494        | KU601494        | -         |
| Rhacophorus_lishuiensis   | -         | -         | KY653717        | KY653717        | -         |

**Outgroup**

|                           |   |           |           |           |           |
|---------------------------|---|-----------|-----------|-----------|-----------|
| Microhyla_annectens       | - | AB611944  | AB634601  | AB611947  | -         |
| Pelophylax_lateralis      | - | -         | KF991259  | KF991279  | KF991320  |
| Pelophylax_nigromaculatus | - | KT878718  | KT878718  | KT878718  | KT878718  |
| Pelophylax_ridibundus     | - | KT879314  | AB640897  | MH410481  | MG575226  |
| Pelophylax_saharicus      | - | KP177812  | -         | KP177671  | GU799108  |
| Rana_kukunoris            | - | -         | KC465786  | KC465786  | -         |
| Rana_catesbeianus         | - | NC_022696 | NC_022696 | NC_022696 | NC_022696 |
| Rana_temporaria           | - | KP697915  | AB058864  | AB058882  | MF624355  |
| Rana_pipiens              | - | EF525892  | Y10945    | X86284    | -         |
| Rana_tlaloci              | - | -         | AY779234  | AY779234  | KX269323  |
| Rana_septentrionalis      | - | EF525899  | KX269179  | KX269179  | AY083273  |
| Alcalus_tasanae           | - | -         | KU243088  | -         | -         |
| Liurana_xizangensis       | - | -         | KU243084  | -         | -         |
| Limnonectes_limborgi      | - | -         | DQ347061  | GU934365  | -         |
| Occidozyga_martensi       | - | -         | KU243090  | DQ458255  | -         |
| Odontobatrachus_natator   | - | -         | KP005222  | KP005103  | KP005427  |
| Conraua_crassipes         | - | -         | DQ347015  | DQ347305  | -         |
| Blommersia_wittei         | - | -         | AY341586  | AY880490  | -         |
| Laliostoma_labrosum       | - | -         | DQ283057  | DQ283057  | -         |

| <b>Species</b>               | <b>BDNF</b> | <b>POMC</b> | <b>RAG1</b> | <b>Rhod</b> | <b>Tyr</b> |
|------------------------------|-------------|-------------|-------------|-------------|------------|
| Ghatixalus_asterops          | -           | -           | -           | -           | -          |
| Ghatixalus_variabilis        | -           | -           | KU169956    | KU169932    | -          |
| Ghatixalus_magnus            | -           | -           | KT359634    | KT359630    | -          |
| Mercurana_myristicapalustris | -           | -           | KC594295    | KC594296    | -          |
| Nasutixalus_jerdonii         | -           | -           | KU169976    | KU169952    | -          |
| Nasutixalus_medogensis       | GQ285690    | GQ285721    | GQ285753    | GQ285782    | GQ285800   |
| Beddomixalus_bijui           | -           | -           | KC594291    | KC594292    | -          |
| Taruga_eques                 | GQ204447    | -           | GQ204571    | GQ204633    | -          |
| Taruga_fastigo               | GQ204448    | -           | GQ204572    | GQ204634    | -          |
| Taruga_longinasus            | GQ204449    | -           | GQ204573    | GQ204635    | -          |
| Nyctixalus_margaritifer      | -           | -           | -           | -           | -          |

|                           |          |          |          |          |          |
|---------------------------|----------|----------|----------|----------|----------|
| Nyctixalus_pictus         | GQ204483 | -        | GQ204613 | GQ204666 | KU244355 |
| Nyctixalus_spinosus       | -        | -        | -        | DQ283827 | -        |
| Feihyla_kajau             | KC961110 | KC961180 | -        | -        | KC961234 |
| Feihyla_palpebralis       | -        | GQ285741 | GQ285773 | EU215576 | -        |
| Feihyla_vittatus          | GQ285711 | GQ285742 | GQ285774 | GQ285793 | GQ285811 |
| Feihyla_hansenae          | GQ285710 | -        | -        | AY880626 | EU215606 |
| Buergeria_buergeri        | AB728215 | AB728249 | AB728271 | AB728288 | AB728322 |
| Buergeria_japonica        | GQ285691 | GQ285722 | GQ285754 | GQ285783 | GQ285801 |
| Buergeria_oxycephala      | GQ285695 | GQ285726 | GQ285758 | EU215556 | EU215585 |
| Buergeria_robusta         | -        | -        | -        | -        | -        |
| Liuixalus_calcarius       | -        | -        | -        | -        | -        |
| Liuixalus_feii            | -        | -        | -        | -        | -        |
| Liuixalus_hainanus        | GQ285694 | GQ285725 | GQ285757 | GQ285785 | GQ285803 |
| Liuixalus_ocellatus       | -        | -        | -        | -        | -        |
| Liuixalus_romeri          | -        | -        | -        | -        | -        |
| Liuixalus_shiwandashan    | GQ285693 | GQ285724 | -        | EU215559 | EU215589 |
| Gracixalus_gracilipes     | GQ285701 | GQ285732 | GQ285764 | GQ285789 | GQ285807 |
| Gracixalus_jinxiuensis    | GQ285700 | GQ285731 | GQ285763 | EU215557 | EU215587 |
| Gracixalus_jinggangensis  | -        | -        | -        | -        | -        |
| Gracixalus_nonggangensis  | -        | -        | -        | -        | -        |
| Gracixalus_waza           | -        | -        | -        | -        | -        |
| Gracixalus_seesom         | -        | -        | -        | -        | -        |
| Gracixalus_sapaensis      | GQ285699 | GQ285730 | GQ285762 | GQ285788 | GQ285806 |
| Gracixalus_quangi         | -        | -        | -        | -        | -        |
| Gracixalus_supercornutus  | -        | -        | -        | -        | -        |
| Gracixalus_lumarius       | -        | -        | -        | -        | -        |
| Gracixalus_quyeti         | -        | -        | -        | -        | -        |
| Gracixalus_medogensis     | -        | -        | -        | -        | -        |
| Kurixalus_appendiculatus  | KC961138 | KC961188 | -        | -        | KC961231 |
| Kurixalus_baliogaster     | -        | -        | -        | -        | -        |
| Kurixalus_banaensis       | GQ285689 | GQ285720 | GQ285752 | GQ285781 | GQ285799 |
| Kurixalus_berylliniris    | -        | -        | -        | -        | -        |
| Kurixalus_bisacculus      | GQ285686 | GQ285717 | GQ285749 | EU215578 | EU215608 |
| Kurixalus_eiffingeri      | -        | -        | -        | -        | -        |
| Kurixalus_idiootocus      | GQ285688 | GQ285719 | GQ285751 | EU215577 | EU215607 |
| Kurixalus_motokawai       | -        | -        | -        | -        | -        |
| Kurixalus_naso            | -        | -        | -        | -        | -        |
| Kurixalus_naso            | -        | -        | -        | -        | -        |
| Kurixalus_odontotarsus    | GQ285687 | GQ285718 | GQ285750 | EU215579 | EU215609 |
| Kurixalus_verrucosus      | -        | -        | JQ060901 | -        | JQ060917 |
| Kurixalus_viridescens     | -        | -        | -        | -        | -        |
| Kurixalus_wangi           | -        | -        | -        | -        | -        |
| Chiromantis_doriae        | GQ285716 | -        | EU924511 | EU924539 | EU924567 |
| Chiromantis_nongkhorensis | -        | -        | GQ204604 | GQ204659 | -        |

|                            |          |          |          |          |          |
|----------------------------|----------|----------|----------|----------|----------|
| Chiromantis_petersii       | -        | -        | -        | -        | -        |
| Chiromantis_rufescens      | GQ204476 | -        | GQ204605 | GQ204660 | DQ347139 |
| Chiromantis_xerampelina    | -        | -        | -        | AY880628 | -        |
| Polypedates_braueri        | AB728193 | AB728234 | AB728251 | AB728273 | AB728307 |
| Polypedates_colletti       | AB728212 | AB728246 | AB728268 | AB728285 | AB728319 |
| Polypedates_cruciger       | GQ204446 | HM998970 | GQ204570 | GQ204632 | -        |
| Polypedates_discantus      | -        | -        | -        | -        | -        |
| Polypedates_impresus       | AB728208 | AB728242 | AB728264 | AB728281 | AB728315 |
| Polypedates_leucomystax    | AB728205 | AB728240 | AB728262 | AB728279 | AB728313 |
| Polypedates_macrotis       | AB728210 | AB728244 | AB728266 | AB728283 | AB728317 |
| Polypedates_maculatus      | AB728211 | AB728245 | AB728267 | AB728284 | AB728318 |
| Polypedates_megacephalus   | AB728200 | AB728239 | AB728258 | AB728278 | AB728312 |
| Polypedates_mutus          | AB728196 | AB728237 | AB728254 | AB728276 | AB728310 |
| Polypedates_otilophus      | AB728213 | AB728247 | AB728269 | AB728286 | AB728320 |
| Polypedates_pseudocruciger | -        | -        | KU169959 | KU169935 | -        |
| Polypedates_teraiensis     | -        | -        | -        | -        | -        |
| Theloderma_albopunctatum   | KU244401 | GQ285728 | GQ285760 | GQ285786 | GQ285804 |
| Theloderma_annae           | -        | -        | -        | -        | -        |
| Theloderma_asperum         | -        | -        | GQ204606 | GQ204661 | -        |
| Theloderma_baibungensis    | -        | -        | -        | -        | -        |
| Theloderma_baibungensis    | -        | -        | -        | -        | -        |
| Theloderma_bicolor         | KF991305 | -        | KF991342 | AY880659 | -        |
| Theloderma_corticale       | KU244393 | -        | -        | KU244316 | KU244354 |
| Theloderma_gordoni         | KU244395 | -        | -        | KU244334 | KU244358 |
| Theloderma_horridum        | -        | -        | -        | -        | -        |
| Theloderma_lacustrinum     | -        | -        | -        | -        | -        |
| Theloderma_laeve           | -        | -        | -        | -        | -        |
| Theloderma_lateriticum     | -        | -        | -        | -        | -        |
| Theloderma_leporosum       | -        | -        | -        | -        | -        |
| Theloderma_licin           | KU244384 | -        | -        | KU244333 | KU244346 |
| Theloderma_moloch          | -        | -        | KU169968 | KU169944 | -        |
| Theloderma_nebulosum       | -        | -        | -        | -        | -        |
| Theloderma_palliatum       | -        | -        | -        | -        | -        |
| Theloderma_phrynodesma     | KU244402 | -        | -        | KJ128278 | KJ128276 |
| Theloderma_pyaukkya        | KU244399 | -        | -        | KU244331 | KU244339 |
| Theloderma_rhododiscus     | -        | -        | -        | DQ284007 | DQ282998 |
| Theloderma_ryabovi         | -        | -        | -        | -        | -        |
| Theloderma_stellatum       | -        | -        | -        | -        | -        |
| Theloderma_truongsonense   | -        | -        | -        | -        | -        |
| Theloderma_vietnamense     | KU561888 | -        | -        | KU561891 | KU561897 |
| Theloderma_petilum         | -        | -        | -        | -        | -        |
| Raorchestes_agasthyaensis  | -        | -        | -        | JX092980 | JX092926 |
| Raorchestes_akroparallagi  | -        | -        | -        | JX092981 | JX092927 |
| Raorchestes_anili          | -        | -        | -        | JX092984 | -        |

|                            |          |          |          |          |          |
|----------------------------|----------|----------|----------|----------|----------|
| Raorchestes_archeos        | -        | -        | -        | JX092983 | -        |
| Raorchestes_aureus         | -        | -        | -        | JX092996 | JX092945 |
| Raorchestes_bedomii        | -        | -        | -        | -        | -        |
| Raorchestes_blandus        | -        | -        | -        | -        | -        |
| Raorchestes_bobingeri      | -        | -        | -        | -        | JX092930 |
| Raorchestes_bombayensis    | -        | -        | -        | JX092986 | JX092931 |
| Raorchestes_chalazodes     | -        | -        | -        | JX092988 | JX092932 |
| Raorchestes_charius        | -        | -        | KU169960 | JX092989 | JX092933 |
| Raorchestes_chlorosomma    | -        | -        | -        | -        | -        |
| Raorchestes_chotta         | -        | -        | -        | -        | JX092934 |
| Raorchestes_chromasynchysi | -        | -        | -        | JX092990 | JX092935 |
| Raorchestes_coonoorensis   | -        | -        | -        | -        | JX092939 |
| Raorchestes_crustai        | -        | -        | -        | -        | JX092940 |
| Raorchestes_dubois         | -        | -        | -        | JX092993 | JX092942 |
| Raorchestes_echinatus      | -        | -        | -        | -        | -        |
| Raorchestes_flaviocularis  | -        | -        | -        | JX092994 | JX092943 |
| Raorchestes_flaviventris   | -        | -        | -        | -        | -        |
| Raorchestes_ghatei         | -        | -        | -        | -        | -        |
| Raorchestes_glandulosus    | -        | -        | KU169962 | JX092995 | JX092944 |
| Raorchestes_graminirupes   | -        | -        | -        | -        | JX092946 |
| Raorchestes_griet          | -        | -        | KU169965 | JX092997 | -        |
| Raorchestes_gryllus        | GQ285714 | GQ285745 | GQ285777 | GQ285796 | GQ285814 |
| Raorchestes_hassanensis    | -        | -        | -        | -        | -        |
| Raorchestes_honnametti     | -        | -        | -        | -        | -        |
| Raorchestes_indigo         | -        | -        | -        | JX092999 | JX092947 |
| Raorchestes_jayarami       | -        | -        | -        | JX093000 | JX092948 |
| Raorchestes_johnceei       | -        | -        | -        | JX093001 | JX092949 |
| Raorchestes_kadalarensis   | -        | -        | -        | JX093002 | JX092950 |
| Raorchestes_kaikatti       | -        | -        | -        | JX093003 | JX092951 |
| Raorchestes_kakachi        | -        | -        | -        | -        | -        |
| Raorchestes_lechiya        | -        | -        | -        | -        | -        |
| Raorchestes_leucolatus     | -        | -        | -        | -        | JX092968 |
| Raorchestes_longchuanensis | GQ285713 | GQ285744 | GQ285776 | GQ285795 | GQ285813 |
| Raorchestes_luteolus       | -        | -        | -        | JX093004 | JX092954 |
| Raorchestes_manohari       | -        | -        | -        | JX093005 | JX092955 |
| Raorchestes_marki          | -        | -        | -        | JX093006 | JX092956 |
| Raorchestes_menglaensis    | GQ285715 | GQ285746 | GQ285778 | GQ285797 | GQ285815 |
| Raorchestes_munnarensis    | -        | -        | -        | JX093008 | JX092959 |
| Raorchestes_nerostagona    | -        | -        | -        | JX093009 | JX092960 |
| Raorchestes_ochlandrae     | -        | -        | -        | JX093010 | JX092962 |
| Raorchestes_parvulus       | -        | -        | -        | -        | -        |
| Raorchestes_ponmudi        | -        | -        | -        | JX093011 | JX092963 |
| Raorchestes_primarrumpfi   | -        | -        | -        | JX093012 | JX092964 |
| Raorchestes_resplendens    | -        | -        | KU169963 | JX093013 | JX092965 |

|                                |          |          |          |          |          |
|--------------------------------|----------|----------|----------|----------|----------|
| Raorchestes_signatus           | -        | -        | KU169961 | KU169937 | JX092966 |
| Raorchestes_silentvalley       | -        | -        | -        | -        | -        |
| Raorchestes_sushili            | -        | -        | -        | JX093018 | JX092972 |
| Raorchestes_theuerkaufi        | -        | -        | -        | -        | -        |
| Raorchestes_tinniens           | -        | -        | KU169966 | KU169942 | JX092973 |
| Raorchestes_travancoricus      | -        | -        | -        | JX093019 | JX092974 |
| Raorchestes_tuberohumerus      | -        | -        | -        | -        | -        |
| Raorchestes_uthamani           | -        | -        | -        | JX093020 | -        |
| Pseudophilautus_kani           | -        | -        | -        | -        | JX092952 |
| Pseudophilautus_alto           | GQ204440 | -        | GQ204562 | -        | -        |
| Pseudophilautus_amboli         | -        | -        | KU169957 | JX092982 | JX092928 |
| Pseudophilautus_asankai        | -        | -        | -        | -        | -        |
| Pseudophilautus_bambaradeniyai | -        | -        | -        | -        | -        |
| Pseudophilautus_cavirostris    | GQ204439 | -        | GQ204561 | GQ204622 | -        |
| Pseudophilautus_decoris        | -        | -        | -        | -        | -        |
| Pseudophilautus_dilmah         | -        | -        | -        | -        | -        |
| Pseudophilautus_folicola       | -        | -        | GQ204564 | GQ204625 | -        |
| Pseudophilautus_hankeni        | -        | -        | -        | -        | -        |
| Pseudophilautus_hoffmanni      | -        | -        | -        | -        | -        |
| Pseudophilautus_leucorhinus    | -        | -        | -        | -        | -        |
| Pseudophilautus_limbus         | -        | -        | GQ204553 | -        | -        |
| Pseudophilautus_lunatus        | GQ204438 | -        | GQ204560 | GQ204621 | -        |
| Pseudophilautus_microtyimpanum | GQ204441 | -        | GQ204563 | GQ204623 | -        |
| Pseudophilautus_mittermeieri   | GQ204443 | -        | GQ204565 | GQ204626 | -        |
| Pseudophilautus_mooreorum      | -        | -        | -        | -        | -        |
| Pseudophilautus_ocularis       | -        | -        | -        | -        | -        |
| Pseudophilautus_papillosus     | -        | -        | -        | -        | -        |
| Pseudophilautus_pleurotaenia   | -        | -        | -        | -        | -        |
| Pseudophilautus_poppiae        | -        | -        | GQ204555 | GQ204616 | -        |
| Pseudophilautus_popularis      | -        | -        | -        | -        | -        |
| Pseudophilautus_sarasinorum    | -        | -        | GQ204552 | GQ204614 | -        |
| Pseudophilautus_schmarda       | GQ204435 | -        | GQ204554 | GQ204615 | -        |
| Pseudophilautus_schneideri     | -        | -        | -        | -        | -        |
| Pseudophilautus_simba          | GQ204442 | -        | -        | GQ204624 | -        |
| Pseudophilautus_steineri       | -        | -        | -        | -        | -        |
| Pseudophilautus_stellatus      | -        | -        | -        | -        | -        |
| Pseudophilautus_stuarti        | -        | -        | GQ204557 | GQ204618 | -        |
| Pseudophilautus_tanu           | -        | -        | -        | -        | -        |
| Pseudophilautus_wynaadensis    | -        | -        | KU169958 | KU169934 | -        |
| Pseudophilautus_zorro          | -        | -        | GQ204556 | GQ204617 | -        |
| Philautus_abditus              | GQ285712 | GQ285743 | GQ285775 | GQ285794 | GQ285812 |
| Philautus_acutirostris         | -        | -        | -        | -        | -        |
| Philautus_acutus               | KC961117 | KC961174 | -        | -        | KC961191 |
| Philautus_amoenus              | KC961140 | KC961159 | -        | -        | KC961196 |

|                            |          |          |          |          |          |
|----------------------------|----------|----------|----------|----------|----------|
| Philautus_aurantium        | GQ204460 | KC961178 | GQ204587 | GQ204642 | KC961193 |
| Philautus_aurifasciatus    | -        | -        | -        | -        | -        |
| Philautus_bunitus          | KC961120 | KC961176 | -        | -        | KC961194 |
| Philautus_cornutus         | -        | -        | -        | -        | -        |
| Philautus_davidlabangi     | KC961130 | KC961166 | -        | -        | KC961207 |
| Philautus_disgregus        | KC961137 | KC961167 | GQ204586 | GQ204641 | -        |
| Philautus_everetti         | -        | -        | -        | -        | -        |
| Philautus_hosii            | KC961113 | KC961172 | -        | -        | KC961205 |
| Philautus_ingeri           | KC961114 | KC961173 | GQ204588 | AY880629 | KC961206 |
| Philautus_juliandringi     | KC961131 | KC961160 | -        | -        | KC961199 |
| Philautus_kakipanjang      | -        | -        | -        | -        | -        |
| Philautus_kerangae         | KC961121 | KC961177 | -        | -        | KC961195 |
| Philautus_macroscelis      | KC961112 | KC961168 | -        | -        | KC961202 |
| Philautus_mjobergi         | KC961132 | KC961162 | -        | -        | KC961197 |
| Philautus_nephophilus      | -        | -        | -        | -        | -        |
| Philautus_petersi          | KC961134 | KC961163 | -        | -        | KC961204 |
| Philautus_refugii          | KC961135 | KC961164 | -        | -        | KC961200 |
| Philautus_surdus           | -        | -        | -        | -        | -        |
| Philautus_tectus           | KC961116 | KC961171 | -        | -        | KC961209 |
| Philautus_umbra            | KC961133 | KC961161 | -        | -        | KC961198 |
| Philautus_vermiculatus     | -        | -        | -        | -        | -        |
| Philautus_worcesteri       | GQ204462 | -        | GQ204589 | GQ204643 | -        |
| Rhacophorus_achantharrhena | -        | -        | -        | -        | -        |
| Rhacophorus_angulirostris  | KC961099 | KC961142 | -        | -        | KC961221 |
| Rhacophorus_annamensis     | GQ204470 | -        | GQ204598 | GQ204653 | -        |
| Rhacophorus_arboreus       | -        | -        | -        | AY880653 | -        |
| Rhacophorus_baluensis      | KC961093 | KC961153 | -        | -        | -        |
| Rhacophorus_belalongensis  | KC961101 | KC961144 | -        | -        | -        |
| Rhacophorus_bengkuluensis  | -        | -        | -        | -        | -        |
| Rhacophorus_bimaculatus    | -        | -        | -        | -        | -        |
| Rhacophorus_bipunctatus    | -        | -        | -        | -        | -        |
| Rhacophorus_bipunctatus    | -        | -        | -        | -        | -        |
| Rhacophorus_borneensis     | -        | -        | -        | -        | -        |
| Rhacophorus_burmanus       | -        | -        | -        | EU215567 | EU215597 |
| Rhacophorus_burmanus       | -        | -        | -        | -        | -        |
| Rhacophorus_calcanus       | -        | -        | -        | -        | -        |
| Rhacophorus_catamitus      | -        | -        | -        | -        | -        |
| Rhacophorus_chenfui        | GQ204467 | -        | GQ204594 | GQ204648 | EU924575 |
| Rhacophorus_cyanopunctatus | KC961098 | KC961152 | -        | -        | KC961230 |
| Rhacophorus_dennysi        | -        | -        | EU924520 | EU924548 | EU924576 |
| Rhacophorus_dorsoviridis   | -        | -        | EU924526 | EU924554 | EU924582 |
| Rhacophorus_duboisii       | -        | -        | EU924529 | EU924557 | EU924585 |
| Rhacophorus_dugritei       | GQ285705 | GQ285736 | GQ285768 | EU215571 | EU215601 |
| Rhacophorus_dulitensis     | KC961122 | KC961158 | -        | -        | KC961235 |

|                               |          |          |          |          |          |
|-------------------------------|----------|----------|----------|----------|----------|
| Rhacophorus_exechopygus       | -        | -        | -        | -        | -        |
| Rhacophorus_fasciatus         | KC961104 | KC961148 | -        | -        | KC961226 |
| Rhacophorus_feae              | -        | -        | EU924522 | EU924550 | EU924578 |
| Rhacophorus_gadingensis       | KC961102 | KC961145 | -        | -        | KC961223 |
| Rhacophorus_gauni             | KC961103 | KC961146 | -        | -        | KC961224 |
| Rhacophorus_harrissoni        | KC961107 | KC961149 | -        | -        | KC961227 |
| Rhacophorus_helenae           | -        | -        | -        | -        | -        |
| Rhacophorus_hongchibaensis    | -        | -        | -        | JN688897 | JN688906 |
| Rhacophorus_hui               | -        | -        | EU924523 | EU924551 | EU924579 |
| Rhacophorus_hungfuensis       | -        | -        | -        | EU215568 | EU215598 |
| Rhacophorus_indonesiensis     | -        | -        | -        | -        | -        |
| Rhacophorus_kio               | GQ285703 | GQ285734 | GQ285766 | EU215562 | EU215592 |
| Rhacophorus_lateralis         | -        | -        | -        | AY880655 | -        |
| Rhacophorus_malabaricus       | -        | -        | AY948912 | KU169943 | -        |
| Rhacophorus_smaragdinus       | -        | -        | -        | -        | -        |
| Rhacophorus_minimus           | -        | -        | EU924525 | EU924553 | EU924581 |
| Rhacophorus_moltrechti        | -        | -        | -        | EU215573 | EU215603 |
| Rhacophorus_monticola         | -        | -        | -        | -        | -        |
| Rhacophorus_nigropalmatus     | GQ204465 | KC961154 | GQ204592 | GQ204646 | KC961210 |
| Rhacophorus_nigropunctatus    | GQ285704 | GQ285735 | GQ285767 | EU215563 | EU215593 |
| Rhacophorus_norhayatii        | AB728214 | AB728248 | AB728270 | AB728287 | AB728321 |
| Rhacophorus_omeimontis        | -        | -        | EU924528 | EU924556 | EU924584 |
| Rhacophorus_orlovi            | -        | -        | -        | DQ283778 | -        |
| Rhacophorus_pardalis          | GQ204466 | KC961156 | GQ204593 | GQ204647 | KC961212 |
| Rhacophorus_penanorum         | KC961100 | KC961143 | -        | -        | KC961222 |
| Rhacophorus_pinglongensis     | -        | -        | -        | -        | -        |
| Rhacophorus_poecilonotus      | -        | -        | -        | -        | -        |
| Rhacophorus_pseudomalabaricus | -        | -        | -        | -        | -        |
| Rhacophorus_puerensis         | -        | -        | EU924521 | EU924549 | EU924577 |
| Rhacophorus_reinwardti        | GQ204472 | -        | GQ204601 | GQ204656 | -        |
| Rhacophorus_rhodopus          | -        | -        | EU924532 | EU924560 | EU924588 |
| Rhacophorus_bipunctatus       | -        | -        | -        | EU215560 | EU215590 |
| Rhacophorus_rhodopus          | -        | -        | -        | AY844737 | -        |
| Rhacophorus_robertingeri      | -        | -        | -        | -        | -        |
| Rhacophorus_rufipes           | KC961106 | KC961150 | -        | -        | KC961228 |
| Rhacophorus_schlegelii        | -        | -        | -        | -        | -        |
| Rhacophorus_translineatus     | -        | -        | -        | -        | -        |
| Rhacophorus_vampyrus          | -        | -        | -        | -        | -        |
| Rhacophorus_tuberculatus      | -        | -        | -        | -        | -        |
| Rhacophorus_wui               | -        | -        | -        | JN688896 | JN688910 |
| Rhacophorus_zhoukaiyae        | KU601449 | KU601458 | KU601467 | KU601476 | KU601485 |
| Rhacophorus_lishuiensis       | -        | -        | -        | -        | -        |
| <b>Outgroup</b>               |          |          |          |          |          |
| Microhyla_annectens           | AB611943 | -        | AB611940 | -        | AB611942 |

|                                  |          |          |          |          |          |
|----------------------------------|----------|----------|----------|----------|----------|
| <i>Pelophylax_lateralis</i>      | KF991301 | -        | EF088273 | -        | -        |
| <i>Pelophylax_nigromaculatus</i> | KX269291 | -        | HQ902533 | KU840635 | DQ282932 |
| <i>Pelophylax_ridibundus</i>     | -        | -        | -        | -        | KT879356 |
| <i>Pelophylax_saharicus</i>      | -        | -        | KP177854 | AY148014 | KT879338 |
| <i>Rana_kukunoris</i>            | -        | GQ285748 | GQ285780 | GQ285798 | GQ285816 |
| <i>Rana_catesbeianus</i>         | AB612040 | AY819103 | AB612037 | -        | AB612039 |
| <i>Rana_temporaria</i>           | KC800199 | KC800339 | AY323776 | -        | KC800261 |
| <i>Rana_pipiens</i>              | -        | -        | -        | DQ283831 | EU769542 |
| <i>Rana_tlaloci</i>              | KX269251 | KX269465 | KX269540 | -        | KX269768 |
| <i>Rana_septentrionalis</i>      | KX269240 | KX269454 | KX269529 | -        | KX269757 |
| <i>Alcalus_tasanae</i>           | -        | -        | KU243098 | KU243108 | KU243118 |
| <i>Liurana_xizangensis</i>       | -        | -        | KU243093 | KU243102 | KU243112 |
| <i>Limnonectes_limborgi</i>      | -        | -        | DQ347286 | DQ347407 | DQ347194 |
| <i>Occidozyga_martensi</i>       | -        | -        | KU243099 | KU243109 | KU243119 |
| <i>Odontobatrachus_natator</i>   | KP005321 | -        | KP005354 | -        | -        |
| <i>Conraua_crassipes</i>         | -        | -        | DQ347244 | DQ347364 | DQ347148 |
| <i>Blommersia_wittei</i>         | EF396018 | -        | AY323774 | AY323743 | AY341751 |
| <i>Laliostoma_labrosum</i>       | -        | -        | AY571652 | AF249106 | AF249169 |

---



**Dicroglossidae**

| <b>Species</b>             | <b>RAG2</b>     | <b>RAG1</b>     | <b>Rhod</b>     | <b>Tyr</b>      | <b>12s</b> |
|----------------------------|-----------------|-----------------|-----------------|-----------------|------------|
| Nanorana_arnoldi           | -               | -               | EU979858        | EU979949        | EU979777   |
| Nanorana_aenea             | HM163645        | HM163609        | EU979895        | EU979986        | AF206093   |
| Nanorana_blanfordii        | <b>MW111356</b> | <b>MW111370</b> | <b>MW111350</b> | <b>MW111344</b> | -          |
| Nanorana_bourreti          | HM163630        | HM163594        | EU979882        | EU979973        | EU979767   |
| Nanorana_chayuensis        | <b>MW111357</b> | <b>MW111371</b> | <b>MW111351</b> | <b>MW111345</b> | DQ118466   |
| Nanorana_conaensis         | HM163625        | HM163589        | EU979874        | EU979965        | EU979774   |
| Nanorana_liebigii          | <b>MW111358</b> | <b>MW111372</b> | <b>MW111352</b> | <b>MW111346</b> | DQ118455   |
| Nanorana_liebigii          | <b>MW111359</b> | <b>MW111373</b> | <b>MW111353</b> | <b>MW111347</b> | -          |
| Nanorana_maculosa          | HM163624        | HM163588        | EU979859        | EU979950        | DQ118468   |
| Nanorana_medogensis        | HM163626        | HM163590        | EU979862        | EU979953        | DQ118462   |
| Nanorana_parkeri           | HM163620        | HM163584        | EU979873        | EU979964        | AF206110   |
| Nanorana_pleskei           | HM163622        | HM163586        | EU979870        | EU979961        | DQ346988   |
| Nanorana_rostandi          | <b>MW111360</b> | <b>MW111374</b> | <b>MW111354</b> | <b>MW111348</b> | -          |
| Nanorana_quadranus         | HM163627        | HM163591        | EU979887        | EU979978        | GQ225906   |
| Nanorana_polunini          | <b>MW111361</b> | <b>MW111375</b> | <b>MW111355</b> | <b>MW111349</b> | -          |
| Nanorana_taihangnica       | HM163644        | HM163608        | EU979893        | EU979984        | KF199146   |
| Nanorana_unculuanus        | HM163631        | HM163595        | DQ458262        | DQ458277        | -          |
| Nanorana_yunnanensis       | HM163629        | HM163593        | EU979875        | EU979966        | DQ118448   |
| Nanorana_ventripunctata    | HM163621        | HM163585        | EU979868        | EU979959        | -          |
| Quasipaa_boulengeri        | HM163641        | HM163605        | EU979911        | EU980002        | EU979791   |
| Quasipaa_shini             | HM163638        | HM163602        | EU979907        | EU979998        | -          |
| Quasipaa_spinosa           | HM163642        | HM163606        | EU979913        | EU980004        | AF206088   |
| Quasipaa_verrucospinosa    | HM163636        | HM163599        | EU979896        | EU979987        | EU979790   |
| Quasipaa_yei               | HM163632        | HM163596        | EU979905        | EU979996        | DQ118445   |
| Euphlyctis_cyanophlyctis   | AB488997        | DQ347205        | AF249111        | AF249174        | DQ346962   |
| Euphlyctis_hexadactylus    | -               | MG719916        | -               | -               | NC_014584  |
| Fejervarya_cancrivora      | HM163617        | HM163581        | EU979938        | EU980029        | -          |
| Fejervarya_limnocharis     | HM163616        | HM163580        | EU979936        | EU980027        | -          |
| Fejervarya_iskandari       | AB488981        | AB488954        | AB489021        | AB277355        | -          |
| Fejervarya_triora          | AB488982        | AB488939        | AB489022        | AB489003        | -          |
| Fejervarya_sakishimensis   | AB488985        | AB488940        | AB489025        | AB489004        | -          |
| Fejervarya_multistriata    | AB500252        | AB500220        | AB500257        | AB500265        | -          |
| Hoplobatrachus_crassus     | -               | DQ347211        | AF249109        | AF249172        | DQ346972   |
| Hoplobatrachus_occipitalis | HM163648        | DQ347217        | DQ283787        | EU980026        | DQ346979   |
| Hoplobatrachus_rugulosus   | -               | DQ347222        | DQ458257        | EU980024        | DQ346985   |
| Hoplobatrachus_tigerinus   | AB488998        | AB488958        | AB489039        | AB277358        | AB290422   |
| Limnonectes_finchi         | -               | -               | AY322230        | AY322355        | AY322306   |
| Limnonectes_fragilis       | HM163647        | HM163611        | DQ458270        | EU980020        | AY703867   |
| Limnonectes_fujianensis    | HM163618        | HM163582        | DQ458260        | DQ458275        | AY703865   |
| Limnonectes_grunniens      | -               | -               | DQ283885        | EU980023        | -          |
| Limnonectes_kuhlii         | -               | DQ347232        | AF249116        | EU980019        | AY703869   |

|                                 |          |          |          |          |          |
|---------------------------------|----------|----------|----------|----------|----------|
| <i>Limnonectes_deinodon</i>     | AB489000 | AB488960 | AB489041 | AB277359 | AF183125 |
| <i>Limnonectes_limborgi</i>     | -        | DQ347286 | DQ347407 | -        | DQ347061 |
| <i>Limnonectes_magnus</i>       | -        | -        | DQ347373 | DQ347157 | DQ347022 |
| <i>Limnonectes_modestus</i>     | -        | -        | EU979930 | EU980021 | AY313766 |
| <i>Limnonectes_poilani</i>      | -        | -        | DQ283997 | DQ282989 | DQ283378 |
| <i>Minervarya_pierrei</i>       | AB490160 | AB488942 | AB489027 | AB489006 | AB488865 |
| <i>Minervarya_caperata</i>      | AB488990 | AB488946 | AB489031 | AB489010 | -        |
| <i>Minervarya_greenii</i>       | AB488988 | AB488944 | AB489029 | AB489008 | AB488868 |
| <i>Minervarya_syhadrensis</i>   | AB488989 | AB488945 | AB489030 | AB489009 | AF249011 |
| <i>Sphaerotheca_breviceps</i>   | -        | -        | AF249110 | DQ282927 | AF161039 |
| <i>Sphaerotheca_dobsonii</i>    | AB488999 | AB488959 | AB489040 | AB277357 | AB277290 |
| <i>Sphaerotheca_pluvialis</i>   | -        | DQ347214 | -        | AF249173 | -        |
| <i>Sphaerotheca_rolandae</i>    | -        | -        | -        | -        | -        |
| <i>Nannophrys_ceylonensis</i>   | -        | AY948917 | AF249112 | AF249175 | DQ346975 |
| <i>Ingerana_tenasserimensis</i> | -        | DQ347258 | AY322236 | AY322344 | AY322308 |
| <i>Ingerana_borealis</i>        | -        | KU243100 | KU243110 | KU243120 | KU243091 |
| <i>Occidozyga_baluensis</i>     | -        | -        | DQ283844 | DQ282936 | DQ283143 |
| <i>Occidozyga_laevis</i>        | -        | DQ347254 | AY322227 | AY322342 | DQ347024 |
| <i>Occidozyga_lima</i>          | AB489001 | DQ019503 | DQ283901 | DQ282951 | DQ283224 |
| <i>Occidozyga_martensii</i>     | -        | KU243099 | DQ458266 | DQ458283 | DQ283357 |

#### **Outgroup**

|                                  |          |          |          |          |           |
|----------------------------------|----------|----------|----------|----------|-----------|
| <i>Staurois_nanator</i>          | -        | DQ347250 | DQ347371 | DQ347155 | -         |
| <i>Rana_sylvatica</i>            | DQ019546 | DQ347278 | DQ347397 | DQ347185 | -         |
| <i>Boophis_doulioti</i>          | DQ019519 | AY571643 | AY341792 | -        | -         |
| <i>Boophis_tephraeomystax</i>    | -        | DQ347234 | AF249105 | -        | DQ347000  |
| <i>Blommersia_wittei</i>         | AY323795 | AY323774 | AY880667 | AY341751 | AY880536  |
| <i>Mantella_aurantiaca</i>       | AY723547 | AY723530 | AY263281 | DQ282901 | DQ283035  |
| <i>Rhacophorus_dugritei</i>      | -        | GQ285768 | EU215571 | EU215601 | EF564471  |
| <i>Petropedetes_martiensseni</i> | -        | DQ347289 | DQ347410 | DQ347197 | DQ347064  |
| <i>Aubria_subsigillata</i>       | -        | -        | DQ283865 | DQ282975 | -         |
| <i>Strongylopus_bonaespei</i>    | -        | DQ347288 | DQ347409 | DQ347196 | DQ347063  |
| <i>Amietia_angolensis</i>        | DQ019515 | DQ347257 | DQ347377 | DQ347163 | DQ347029  |
| <i>Pelophylax_nigromaculatus</i> | KX269656 | KX269581 | DQ360014 | DQ360045 | KX269216  |
| <i>Rana_pipiens</i>              | -        | DQ347265 | DQ347384 | EU769542 | DQ347039  |
| <i>Rana_catesbeianus</i>         | AB612038 | AB612037 | -        | AB612039 | NC_022696 |
| <i>Rana_temporaria</i>           | AY323803 | AY323776 | -        | KC800261 | AB058864  |
| <i>Liurana_alpina</i>            | -        | KU243094 | KU243104 | KU243114 | KU243085  |
| <i>Liurana_xizangensis</i>       | -        | KU243093 | KU243102 | KU243112 | KU243084  |
| <i>Cornufer_guentheri</i>        | -        | -        | DQ284031 | DQ283024 | DQ283198  |
| <i>Platymantis_dorsalis</i>      | -        | DQ347246 | DQ347367 | DQ347151 | DQ347199  |
| <i>Platymantis_hazelae</i>       | -        | DQ347248 | DQ347369 | DQ347153 | DQ347019  |
| <i>Platymantis_naomii</i>        | -        | DQ347249 | DQ347370 | DQ347154 | DQ347201  |
| <i>Platymantis_papuensis</i>     | -        | DQ347268 | DQ347387 | DQ347175 | DQ347042  |

**Species**

**16s**

|                            |           |
|----------------------------|-----------|
| Nanorana_arnoldi           | EU979837  |
| Nanorana_aenea             | AF206474  |
| Nanorana_blanfordii        | -         |
| Nanorana_bourreti          | EU979827  |
| Nanorana_chayuensis        | DQ118510  |
| Nanorana_conaensis         | EU979834  |
| Nanorana_liebigii          | DQ118499  |
| Nanorana_liebigii          | -         |
| Nanorana_maculosa          | DQ118512  |
| Nanorana_medogensis        | DQ118506  |
| Nanorana_parkeri           | AF206491  |
| Nanorana_pleskei           | AF206492  |
| Nanorana_rostandi          | -         |
| Nanorana_quadranus         | GQ225932  |
| Nanorana_polunini          | -         |
| Nanorana_taihangnica       | KF199146  |
| Nanorana_unculuanus        | DQ118491  |
| Nanorana_yunnanensis       | DQ118492  |
| Nanorana_ventripunctata    | EU979839  |
| Quasipaa_boulengeri        | EU979851  |
| Quasipaa_shini             | DQ118487  |
| Quasipaa_spinosa           | AF206469  |
| Quasipaa_verrucospinosa    | EU979813  |
| Quasipaa_yei               | DQ118488  |
| Euphlyctis_cyanophlyctis   | AY014366  |
| Euphlyctis_hexadactylus    | NC_014584 |
| Fejervarya_cancrivora      | EU979849  |
| Fejervarya_limnocharis     | AF206466  |
| Fejervarya_iskandari       | AB277303  |
| Fejervarya_triora          | AB488883  |
| Fejervarya_sakishimensis   | AB488886  |
| Fejervarya_multistriata    | AB488884  |
| Hoplobatrachus_crassus     | AF249044  |
| Hoplobatrachus_occipitalis | DQ283059  |
| Hoplobatrachus_rugulosus   | AF206465  |
| Hoplobatrachus_tigerinus   | FJ008057  |
| Limnonectes_finchi         | AY322295  |
| Limnonectes_fragilis       | AY703854  |
| Limnonectes_fujianensis    | DQ118518  |
| Limnonectes_grunniens      | U66125    |
| Limnonectes_kuhlii         | DQ283370  |
| Limnonectes_deinodon       | AB277306  |
| Limnonectes_limborgi       | AF261269  |
| Limnonectes_magnus         | AY313706  |

|                                  |           |
|----------------------------------|-----------|
| <i>Limnonectes_modestus</i>      | AY313766  |
| <i>Limnonectes_poilani</i>       | DQ283378  |
| <i>Minervarya_pierrei</i>        | AB488888  |
| <i>Minervarya_caperata</i>       | AB355845  |
| <i>Minervarya_greenii</i>        | AB488891  |
| <i>Minervarya_syhadrensis</i>    | AY841748  |
| <i>Sphaerotheca_breviceps</i>    | AF249042  |
| <i>Sphaerotheca_dobsonii</i>     | AB277305  |
| <i>Sphaerotheca_pluvialis</i>    | AF249042  |
| <i>Sphaerotheca_rolandae</i>     | GU191122  |
| <i>Nannophrys_ceylonensis</i>    | AF215394  |
| <i>Ingerana_tenasserimensis</i>  | AY322302  |
| <i>Ingerana_borealis</i>         | -         |
| <i>Occidozyga_baluensis</i>      | DQ283143  |
| <i>Occidozyga_laevis</i>         | AY322300  |
| <i>Occidozyga_lima</i>           | AF206497  |
| <i>Occidozyga_martensii</i>      | DQ283357  |
| <b>Outgroup</b>                  |           |
| <i>Staurois_nanator</i>          | -         |
| <i>Rana_sylvatica</i>            | -         |
| <i>Boophis_doulioti</i>          | -         |
| <i>Boophis_tephraeomystax</i>    | DQ283032  |
| <i>Blommersia_wittei</i>         | -         |
| <i>Mantella_aurantiaca</i>       | DQ283035  |
| <i>Rhacophorus_dugritei</i>      | EF564541  |
| <i>Petropedetes_martiensseni</i> | DQ347346  |
| <i>Aubria_subsigillata</i>       | DQ283173  |
| <i>Strongylopus_bonaespei</i>    | DQ347345  |
| <i>Amietia_angolensis</i>        | DQ347318  |
| <i>Pelophylax_nigromaculatus</i> | DQ359991  |
| <i>Rana_pipiens</i>              | Y10945    |
| <i>Rana_catesbeianus</i>         | NC_022696 |
| <i>Rana_temporaria</i>           | AB058882  |
| <i>Liurana_alpina</i>            | -         |
| <i>Liurana_xizangensis</i>       | -         |
| <i>Cornufer_guentheri</i>        | -         |
| <i>Platymantis_dorsalis</i>      | DQ347308  |
| <i>Platymantis_hazelae</i>       | DQ347310  |
| <i>Platymantis_naomii</i>        | DQ347311  |
| <i>Platymantis_papuensis</i>     | DQ347326  |

---

**Ceratobatrachidae**

| <b>Species</b>           | <b>12s</b> | <b>16s</b> | <b>RAG1</b> | <b>Tyr</b> | <b>POMC</b> |
|--------------------------|------------|------------|-------------|------------|-------------|
| Liurana_alpina           | KU243086   | KU243086   | KU243094    | KU243114   | -           |
| Liurana_medogensis       | -          | -          | -           | KU243113   | -           |
| Liurana_vallecula        | -          | -          | -           | MK462155   | -           |
| Liurana_vallecula        | -          | -          | -           | MK462156   | -           |
| Liurana_xizangensis      | KU243083   | KU243083   | KU243093    | KU243112   | -           |
| Alcalus_baluensis        | DQ283142   | DQ283142   | DQ347270    | DQ347177   | -           |
| Alcalus_tasanae          | KU243089   | KU243089   | KU243096    | KU243116   | -           |
| Alcalus_mariae           | KP298038   | KP298038   | KP298263    | -          | KP298166    |
| Alcalus_rajae            | -          | KP298028   | -           | KP298326   | KP298163    |
| Cornufer_guentheri       | KP298021   | -          | KP298261    | DQ347179   | KP298156    |
| Cornufer_guppyi          | KP298024   | KP298024   | DQ347269    | DQ347176   | KP298159    |
| Cornufer_minutus         | KP298016   | KP298016   | KP298256    | KP298318   | KP298151    |
| Cornufer_vertebralis     | KP298018   | -          | KP298258    | KP298320   | KP298153    |
| Cornufer_bufoniformis    | KP298022   | KP298022   | -           | -          | KP298157    |
| Cornufer_malukuna        | KP298025   | KP298025   | -           | KP298323   | KP298160    |
| Cornufer_wolffi          | KP298033   | KP298033   | -           | KP298328   | KP298164    |
| Cornufer_pelewensis      | KP298045   | KP298045   | -           | KP298330   | KP298168    |
| Cornufer_adiastolus      | KP298052   | KP298052   | -           | KP298331   | KP298169    |
| Cornufer_boulengeri      | KP298056   | KP298056   | KP298266    | KP298333   | KP298173    |
| Cornufer_gilliardi       | KP298060   | KP298060   | -           | KP298335   | KP298177    |
| Cornufer_occidentalis    | KP298071   | KP298071   | -           | KP298339   | KP298187    |
| Cornufer_papuensis       | KP298072   | KP298072   | -           | KP298340   | KP298188    |
| Cornufer_vitianus        | KP298079   | KP298079   | KP298271    | KP298343   | KP298193    |
| Cornufer_caesiops        | KP298081   | KP298081   | -           | KP298345   | KP298195    |
| Cornufer_bufonulus       | KP298082   | KP298082   | -           | KP298346   | KP298196    |
| Cornufer_hedigeri        | KP298083   | KP298083   | KP298273    | KP298347   | KP298197    |
| Cornufer_akarithymus     | KP298084   | KP298084   | -           | KP298348   | KP298198    |
| Cornufer_solomonis       | KP298088   | KP298088   | KP298275    | KP298350   | KP298202    |
| Cornufer_cheesemanae     | KP298096   | KP298096   | -           | KP298355   | KP298208    |
| Cornufer_myersi          | KP298121   | KP298121   | KP298298    | KP298373   | KP298231    |
| Cornufer_parilis         | KP298122   | KP298122   | KP298299    | KP298374   | KP298232    |
| Cornufer_weberi          | KP298149   | KP298149   | -           | KP298394   | KP298254    |
| Platymantis_hazelae      | KP298061   | KP298061   | DQ347248    | DQ347153   | KP298178    |
| Platymantis_corrugatus   | KP298058   | KP298058   | KP298267    | KP298334   | KP298175    |
| Platymantis_insulatus    | KP298062   | KP298062   | -           | KP298337   | KP298179    |
| Platymantis_isarog       | KP298063   | KP298063   | -           | KP298338   | KP298180    |
| Platymantis_banahao      | KP298089   | KP298089   | -           | KP298351   | KP298203    |
| Platymantis_bayani       | KP298091   | KP298091   | KP298276    | KP298352   | KP298204    |
| Platymantis_cagayanensis | KP298094   | KP298094   | KP298278    | KP298353   | KP298206    |
| Platymantis_diesmosi     | KP298097   | KP298097   | KP298280    | KP298356   | KP298209    |
| Platymantis_dorsalis     | KP298098   | KP298098   | KP298281    | KP298357   | KP298210    |

|                                    |           |           |          |          |          |
|------------------------------------|-----------|-----------|----------|----------|----------|
| <i>Platymantis_guentheri</i>       | KP298103  | KP298103  | KP298286 | KP298361 | KP298215 |
| <i>Platymantis_indepressus</i>     | KP298108  | KP298108  | KP298290 | KP298366 | KP298220 |
| <i>Platymantis_lawtoni</i>         | KP298114  | KP298114  | KP298293 | KP298369 | -        |
| <i>Platymantis_levigatus</i>       | KP298115  | KP298115  | KP298294 | KP298370 | KP298225 |
| <i>Platymantis_luzonensis</i>      | KP298117  | KP298117  | -        | KP298371 | KP298227 |
| <i>Platymantis_mimulus</i>         | KP298120  | KP298120  | KP298297 | -        | KP298230 |
| <i>Platymantis_negrosensis</i>     | KP298123  | KP298123  | KP298300 | KP298375 | KP298233 |
| <i>Platymantis_naomii</i>          | KP298124  | KP298124  | KP298301 | KP298376 | KP298234 |
| <i>Platymantis_paengi</i>          | KP298125  | KP298125  | KP298302 | KP298377 | KP298235 |
| <i>Platymantis_panayensis</i>      | KP298126  | KP298126  | KP298303 | KP298378 | KP298236 |
| <i>Platymantis_polillensis</i>     | KP298128  | KP298128  | KP298305 | KP298380 | -        |
| <i>Platymantis_pseudodorsalis</i>  | KP298129  | KP298129  | -        | KP298381 | KP298238 |
| <i>Platymantis_pygmaeus</i>        | KP298130  | KP298130  | KP298306 | KP298382 | KP298239 |
| <i>Platymantis_rabori</i>          | KP298131  | KP298131  | KP298307 | KP298383 | KP298240 |
| <i>Platymantis_sierramadrensis</i> | KP298139  | KP298139  | -        | KP298389 | KP298248 |
| <i>Platymantis_spelaeus</i>        | KP298143  | KP298143  | KP298313 | KP298390 | KP298251 |
| <i>Platymantis_subterrestris</i>   | KP298146  | KP298146  | KP298315 | KP298392 | KP298253 |
| <i>Platymantis_taylori</i>         | KP298148  | KP298148  | KP298316 | KP298393 | -        |
| <b>Outgroup</b>                    |           |           |          |          |          |
| <i>Occidozyga_lima</i>             | DQ283224  | AF206497  | DQ019503 | DQ282951 | -        |
| <i>Nanorana_parkeri</i>            | AF206110  | AF206491  | DQ019501 | EU979964 | -        |
| <i>Fejervarya_limnocharis</i>      | AB277282  | AF206466  | -        | EU980027 | AB526646 |
| <i>Rana_sylvatica</i>              | DQ347052  | DQ283387  | DQ019511 | DQ347185 | -        |
| <i>Rana_temporaria</i>             | AB058864  | AB058882  | AY323776 | KC800261 | KC800339 |
| <i>Rana_pipiens</i>                | Y10945    | X86284    | -        | EU769542 | -        |
| <i>Rana_catesbeianus</i>           | NC_022696 | NC_022696 | AB612037 | -        | AY819103 |
| <i>Rana_tlaloci</i>                | AY779234  | AY779234  | KX269540 | KX269768 | KX269465 |
| <i>Rana_septentrionalis</i>        | KX269179  | KX269179  | KX269529 | KX269757 | KX269454 |
| <i>Rhacophorus_dugritei</i>        | EF564471  | EF564541  | GQ285768 | EU215601 | GQ285736 |
| <i>Mantidactylus_femoralis</i>     | AY843698  | AY843698  | -        | DQ282900 | -        |
| <i>Boophis_doulioti</i>            | AY341608  | AY341663  | AY571643 | -        | -        |
| <i>Pelophylax_nigromaculatus</i>   | KT878718  | KT878718  | HQ902533 | DQ282932 | -        |
| <i>Phrynodon_sandersoni</i>        | DQ283083  | DQ283083  | GU457749 | DQ282973 | -        |

**Bufonidae**

| <b>Species</b>            | <b>12s</b> | <b>16s</b> | <b>CXCR4</b> | <b>NCX1</b> | <b>POMC</b> |
|---------------------------|------------|------------|--------------|-------------|-------------|
| Adenomus_kelaartii        | FJ882780   | FJ882780   | EF107447     | EF107221    | -           |
| Anaxyrus_americanus       | FJ882827   | DQ158426   | DQ306520     | FJ882676    | DQ158268    |
| Anaxyrus_quercicus        | DQ158484   | DQ158484   | DQ306549     | -           | DQ158325    |
| Anaxyrus_terrestris       | FJ882829   | FJ882829   | DQ306537     | FJ882677    | DQ158330    |
| Ansonia_hanitschi         | AB331710   | FJ882794   | FJ882695     | FJ882642    | -           |
| Ansonia_letopus           | FJ882795   | FJ882795   | FJ882697     | FJ882644    | -           |
| Ghatophryne_ornata        | FJ882797   | FJ882797   | FJ882694     | FJ882641    | -           |
| Atelopus_peruensis        | DQ158419   | DQ158419   | DQ306495     | -           | AY819078    |
| Atelopus_spumarius        | DQ283260   | DQ283260   | GU183852     | GU183854    | -           |
| Barbarophryne_brongersmai | FJ882817   | FJ882817   | FJ882718     | FJ882663    | -           |
| Bufo_aspinus              | AF160770   | AF160787   | -            | -           | -           |
| Bufo_bankorensis          | AB159476   | AB159589   | -            | -           | -           |
| Bufo_bufo                 | AY325988   | FJ882806   | DQ306504     | FJ882650    | DQ158280    |
| Bufo_cryptotympanicus     | AF160771   | AF160789   | -            | -           | -           |
| Bufo_gargarizans          | NC_008410  | NC_008410  | FJ882707     | FJ882653    | -           |
| Bufo_japonicus            | AB159452   | AB159565   | AB612061     | AB612062    | -           |
| Bufo_stejnegeri           | AF218710   | NC_027686  | -            | -           | -           |
| Bufo_tibetanus            | AF160766   | AF160784   | -            | -           | -           |
| Bufo_torrenticola         | AB159465   | AB159578   | JN653312     | -           | JN653305    |
| Bufo_tuberculatus         | AF160765   | AF160783   | -            | -           | -           |
| Bufo_tuberospinus         | AF160769   | AF160788   | -            | -           | -           |
| Bufo_verrucosissimus      | FJ882807   | FJ882807   | FJ882705     | FJ882651    | -           |
| Bufotes_balearicus        | -          | EU497437   | -            | -           | -           |
| Bufotes_boulengeri        | -          | EU497492   | -            | -           | -           |
| Bufotes_oblongus          | AF160777   | AF160796   | -            | -           | -           |
| Bufotes_pewzowi           | GQ489032   | -          | -            | -           | -           |
| Bufotes_siculus           | -          | EU497446   | -            | -           | -           |
| Bufotes_variabilis        | GQ489041   | -          | -            | -           | -           |
| Bufotes_viridis           | AY680267   | FJ882813   | FJ882714     | FJ882659    | -           |
| Bufotes_zamdaensis        | -          | -          | -            | -           | -           |
| Bufotes_zamdaensis        | -          | -          | -            | -           | -           |
| Bufotes_latastii          | -          | -          | -            | -           | -           |
| Bufotes_baturae           | -          | -          | -            | -           | -           |
| Capensibufo_rosei         | AF220864   | AF220911   | -            | -           | -           |
| Capensibufo_tradouwi      | AF220865   | AF220912   | -            | -           | -           |
| Churamiti_maridadi        | FJ882769   | FJ882769   | FJ882715     | FJ882660    | -           |
| Dendrophryniscus_minutus  | AY843582   | AY843582   | DQ306496     | -           | AY819081    |
| Didynamipus_sjostedti     | AY325991   | AY325991   | -            | -           | -           |
| Duttaphrynus_atukoralei   | FJ882835   | FJ882835   | FJ882682     | FJ882629    | -           |
| Duttaphrynus_brevirostris | FJ882786   | FJ882786   | FJ882686     | FJ882633    | -           |
| Duttaphrynus_crocus       | FJ882789   | FJ882789   | FJ882690     | FJ882637    | -           |

|                                      |                 |                 |          |          |          |
|--------------------------------------|-----------------|-----------------|----------|----------|----------|
| <i>Duttaphrynus_dhufarensis</i>      | FJ882837        | FJ882837        | FJ882679 | FJ882626 | -        |
| <i>Duttaphrynus_himalayanus</i>      | <b>MW111525</b> | <b>MW111525</b> | FJ882688 | FJ882635 | -        |
| <i>Duttaphrynus_hololius</i>         | FJ882781        | FJ882781        | FJ882680 | FJ882627 | -        |
| <i>Duttaphrynus_melanostictus</i>    | AB331714        | FJ882791        | DQ306508 | AY948805 | DQ158317 |
| <i>Duttaphrynus_parietalis</i>       | FJ882784        | FJ882784        | FJ882684 | FJ882631 | -        |
| <i>Duttaphrynus_scaber</i>           | FJ882785        | FJ882785        | FJ882683 | FJ882630 | -        |
| <i>Duttaphrynus_stomaticus</i>       | FJ882787        | FJ882787        | FJ882681 | FJ882628 | -        |
| <i>Duttaphrynus_stuarti</i>          | <b>MW111526</b> | <b>MW111526</b> | FJ882689 | FJ882636 | -        |
| <i>Epidalea_calamita</i>             | FJ882809        | FJ882809        | FJ882709 | FJ882655 | -        |
| <i>Incilius_alvarius</i>             | AY325984        | DQ283269        | DQ306516 | -        | AY819079 |
| <i>Incilius_coccifer</i>             | DQ158443        | DQ158443        | DQ306526 | -        | DQ158284 |
| <i>Ingerophrynus_divergens</i>       | FJ882802        | FJ882802        | FJ882701 | FJ882648 | -        |
| <i>Ingerophrynus_galeatus</i>        | FJ882767        | FJ882768        | DQ306506 | FJ882649 | DQ158293 |
| <i>Ingerophrynus_macrotis</i>        | DQ158468        | FJ882803        | DQ306525 | -        | DQ158309 |
| <i>Ingerophrynus_biporcatus</i>      | AY325987        | KY555646        | KY555668 | KX192102 | -        |
| <i>Ingerophrynus_parvus</i>          | KF664931        | MG935843        | KF665955 | -        | KU183067 |
| <i>Ingerophrynus_philippinicus</i>   | AF375488        | -               | -        | -        | -        |
| <i>Bufoides_meghalayanus</i>         | KT991331        | KT991342        | -        | -        | -        |
| <i>Leptophryne_borbonica</i>         | FJ882799        | AB331716        | EF107450 | EF107224 | -        |
| <i>Melanophryniscus_klappenbachi</i> | AY843699        | AY843699        | -        | -        | -        |
| <i>Melanophryniscus_stelzneri</i>    | FJ882853        | FJ882853        | DQ306494 | AY948822 | DQ158263 |
| <i>Mertensophryne_micranotis</i>     | FJ882821        | FJ882821        | EF107491 | EF107271 | -        |
| <i>Mertensophryne_uzunguensis</i>    | FJ882819        | FJ882819        | FJ882720 | FJ882665 | -        |
| <i>Nannophryne_apolobambica</i>      | DQ158494        | DQ158494        | DQ306515 | -        | DQ158335 |
| <i>Nannophryne_cophotis</i>          | DQ158446        | DQ158446        | DQ306540 | -        | DQ158287 |
| <i>Nectophryne_afra</i>              | EU394535        | EU394535        | -        | -        | -        |
| <i>Nectophrynoides_tornieri</i>      | FJ882815        | FJ882815        | EF107490 | EF107270 | -        |
| <i>Nectophrynoides_viviparus</i>     | FJ882816        | FJ882816        | FJ882716 | FJ882661 | -        |
| <i>Osornophryne_guacamayo</i>        | AY819334        | AY326036        | -        | -        | AY819083 |
| <i>Pedostibes_hosii</i>              | FJ882804        | AY325993        | EF107449 | EF107223 | -        |
| <i>Pedostibes_tuberculosis</i>       | FJ882793        | FJ882793        | FJ882693 | FJ882640 | -        |
| <i>Pelophryne_misera</i>             | FJ882800        | FJ882800        | FJ882700 | FJ882647 | -        |
| <i>Pelophryne_signata</i>            | FJ882801        | FJ882801        | FJ882699 | FJ882646 | -        |
| <i>Peltophryne_lemur</i>             | DQ158465        | DQ158465        | DQ306513 | -        | DQ158306 |
| <i>Phrynoidis_asper</i>              | DQ158432        | AF124109        | DQ306503 | -        | DQ158273 |
| <i>Phrynoidis_juxtasper</i>          | FJ882805        | FJ882805        | DQ306542 | FJ882656 | DQ158304 |
| <i>Poyntonophrynus_dombensis</i>     | AF220857        | AF220907        | -        | -        | -        |
| <i>Rhaebo_haematiticus</i>           | DQ158461        | DQ158461        | DQ306501 | -        | DQ158277 |
| <i>Rhinella_nattereri</i>            | FJ882774        | AY028496        | DQ306557 | FJ882673 | DQ158298 |
| <i>Rhinella_schneideri</i>           | FJ882831        | DQ158480        | DQ306528 | FJ882674 | DQ158322 |
| <i>Rhinella_marina</i>               | -               | -               | -        | -        | -        |
| <i>Sabahphrynus_maculatus</i>        | AB331718        | AB331718        | -        | -        | -        |
| <i>Schismaderma_carens</i>           | AY325997        | AY325997        | FJ882717 | FJ882662 | DQ158266 |
| <i>Sclerophrys_brauni</i>            | FJ882822        | FJ882822        | DQ306514 | EF107272 | DQ158279 |



|                                     |             |                 |          |          |          |
|-------------------------------------|-------------|-----------------|----------|----------|----------|
| <i>Sclerophrys_garmani</i>          | FJ882823    | FJ882823        | DQ306547 | FJ882668 | DQ158294 |
| <i>Strauchbufo_raddei</i>           | AF160776    | GU183855        | -        | -        | -        |
| <i>Vandijkophrynus_amatolicus</i>   | AF220851    | AF220898        | -        | -        | -        |
| <i>Werneria_mertensiana</i>         | DQ283348    | DQ283348        | -        | -        | -        |
| <i>Wolterstorffina_parvipalmata</i> | FJ882818    | FJ882818        | FJ882719 | FJ882664 | -        |
| <i>Xanthophryne_koynayensis</i>     | FJ882782    | FJ882782        | FJ882691 | FJ882638 | -        |
| <b>Outgroup</b>                     |             |                 |          |          |          |
| <i>Odontophrynus_occidentalis</i>   | FJ882743    | FJ882744        | -        | AY948835 | -        |
| <i>Leptodactylus_melanonotus</i>    | DQ347060    | AY943237        | AY364194 | AY948838 | -        |
| <i>Leptodactylus_ocellatus</i>      | AY843688    | -               | DQ306492 | -        | DQ158259 |
| <b>Species</b>                      | <b>RAG1</b> | <b>ND2</b>      |          |          |          |
| <i>Adenomus_kelaartii</i>           | EF107284    | FJ882780        |          |          |          |
| <i>Anaxyrus_americanus</i>          | DQ158352    | FJ882827        |          |          |          |
| <i>Anaxyrus_quercicus</i>           | DQ158403    | -               |          |          |          |
| <i>Anaxyrus_terrestris</i>          | -           | FJ882829        |          |          |          |
| <i>Ansonia_hanitschi</i>            | -           | FJ882794        |          |          |          |
| <i>Ansonia_leptopus</i>             | -           | FJ882795        |          |          |          |
| <i>Ghatophryne_ornata</i>           | -           | FJ882797        |          |          |          |
| <i>Atelopus_peruensis</i>           | -           | -               |          |          |          |
| <i>Atelopus_spumarius</i>           | -           | DQ068447        |          |          |          |
| <i>Barbarophryne_brongersmai</i>    | -           | FJ882817        |          |          |          |
| <i>Bufo_aspinus</i>                 | -           | -               |          |          |          |
| <i>Bufo_bankorensis</i>             | -           | -               |          |          |          |
| <i>Bufo_bufo</i>                    | EU497611    | FJ882806        |          |          |          |
| <i>Bufo_cryptotympanicus</i>        | -           | -               |          |          |          |
| <i>Bufo_gargarizans</i>             | -           | FJ882843        |          |          |          |
| <i>Bufo_japonicus</i>               | AB612057    | -               |          |          |          |
| <i>Bufo_stejnegeri</i>              | -           | NC_027686       |          |          |          |
| <i>Bufo_tibetanus</i>               | -           | NC_020048       |          |          |          |
| <i>Bufo_torrenticola</i>            | -           | -               |          |          |          |
| <i>Bufo_tuberculatus</i>            | -           | -               |          |          |          |
| <i>Bufo_tuberospinus</i>            | -           | -               |          |          |          |
| <i>Bufo_verrucosissimus</i>         | -           | FJ882807        |          |          |          |
| <i>Bufotes_balearicus</i>           | EU497608    | DQ629598        |          |          |          |
| <i>Bufotes_boulengeri</i>           | EU497613    | DQ629608        |          |          |          |
| <i>Bufotes_oblongus</i>             | -           | DQ629601        |          |          |          |
| <i>Bufotes_pewzowi</i>              | GU064322    | DQ629603        |          |          |          |
| <i>Bufotes_siculus</i>              | EU497609    | DQ629608        |          |          |          |
| <i>Bufotes_variabilis</i>           | EU497606    | DQ629600        |          |          |          |
| <i>Bufotes_viridis</i>              | EU497603    | FJ882813        |          |          |          |
| <i>Bufotes_zamdaensis</i>           | -           | <b>MW111460</b> |          |          |          |
| <i>Bufotes_zamdaensis</i>           | -           | <b>MW111461</b> |          |          |          |
| <i>Bufotes_latastii</i>             | -           | DQ629599        |          |          |          |
| <i>Bufotes_baturae</i>              | -           | DQ629604        |          |          |          |

|                               |          |             |
|-------------------------------|----------|-------------|
| Capensibufo_rosei             | -        | HG321482    |
| Capensibufo_tradouwi          | -        | FN650139    |
| Churamiti_maridadi            | -        | KY555706    |
| Dendrophryniscus_minutus      | -        | -           |
| Didynamipus_sjostedti         | -        | -           |
| Duttaphrynus_atukoralei       | -        | FJ882835-36 |
| Duttaphrynus_brevirostris     | -        | FJ882786    |
| Duttaphrynus_crocus           | -        | FJ882789    |
| Duttaphrynus_dhufarensis      | -        | FJ882837-38 |
| Duttaphrynus_himalayanus      | -        | FJ882790    |
| Duttaphrynus_hololius         | -        | FJ882781    |
| Duttaphrynus_melanostictus    | EU712821 | FJ882791    |
| Duttaphrynus_parietalis       | -        | FJ882784    |
| Duttaphrynus_scaber           | -        | FJ882785    |
| Duttaphrynus_stomaticus       | -        | FJ882787    |
| Duttaphrynus_stuarti          | -        | FJ882788    |
| Epidalea_calamita             | EU497610 | FJ882809    |
| Incilius_alvarius             | DQ158351 | JN868006    |
| Incilius_coccifer             | DQ158366 | JN868016    |
| Ingerophrynus_divergens       | EU712818 | FJ882802    |
| Ingerophrynus_galeatus        | DQ158374 | FJ882768    |
| Ingerophrynus_macrotis        | DQ158388 | KY555693    |
| Ingerophrynus_biporcatus      | KY555715 | -           |
| Ingerophrynus_parvus          | KF666331 | KY555702    |
| Ingerophrynus_philippinicus   | -        | -           |
| Bufoides_meghalayanus         | -        | -           |
| Leptophryne_borbonica         | EF107287 | FJ882799    |
| Melanophryniscus_klappenbachi | -        | -           |
| Melanophryniscus_stelzneri    | -        | FJ882853    |
| Mertensophryne_micranotis     | -        | FJ882821    |
| Mertensophryne_uzunguensis    | -        | FJ882819    |
| Nannophryne_apolobambica      | DQ158410 | -           |
| Nannophryne_cophotis          | DQ158369 | -           |
| Nectophryne_afra              | -        | -           |
| Nectophrynoides_tornieri      | EF107329 | FJ882815    |
| Nectophrynoides_viviparus     | -        | FJ882816    |
| Osornophryne_guacamayo        | -        | -           |
| Pedostibes_hosii              | EF107286 | FJ882804    |
| Pedostibes_tuberculosis       | -        | FJ882793    |
| Pelophryne_misera             | -        | FJ882800    |
| Pelophryne_signata            | -        | FJ882801    |
| Peltophryne_lemur             | DQ158386 | -           |
| Phrynooidis_asper             | DQ158356 | KY555704    |
| Phrynooidis_juxtasper         | DQ158385 | FJ882805    |

|                              |          |             |
|------------------------------|----------|-------------|
| Poyntonophrynus_dombensis    | -        | AF463794    |
| Rhaebo_haematiticus          | DQ158383 | JN868019    |
| Rhinella_nattereri           | DQ158380 | -           |
| Rhinella_schneideri          | DQ158399 | FJ882831    |
| Rhinella_marina              | -        | GU907290    |
| Sabahphrynus_maculatus       | -        | -           |
| Schismaderma_carens          | -        | FJ882849-50 |
| Sclerophrys_brauni           | EF107331 | FJ882822    |
| Sclerophrys_garmani          | DQ158375 | FJ882823    |
| Strauchbufo_raddei           | -        | NC_028424   |
| Vandijkophrynus_amatolicus   | -        | -           |
| Werneria_mertensiana         | -        | -           |
| Wolterstorffina_parvipalmata | -        | FJ882818    |
| Xanthophryne_koynayensis     | -        | FJ882782    |
| <b>Outgroup</b>              |          |             |
| Odontophrynus_occidentalis   | AY948934 | JX564880    |
| Leptodactylus_melanonotus    | AY364224 | JX564873    |
| Leptodactylus_ocellatus      | DQ158343 | -           |

---

**Megophryidae**

| <b>Species</b>              | <b>16s</b> | <b>COI</b> | <b>BDNF</b> | <b>RAG1</b> | <b>Rhod</b> |
|-----------------------------|------------|------------|-------------|-------------|-------------|
| Megophrys_sangzhiensis      | KX811856   | KX812117   | KX811961    | KX812226    | KX812343    |
| Megophrys_spinata           | KX811861   | KX812121   | KX811965    | KX812229    | KX812345    |
| Megophrys_binlingensis      | KX811852   | KX812115   | KX811970    | KX812221    | KX812341    |
| Megophrys_jingdongensis     | KX811872   | KX812131   | KX811973    | KX812232    | KX812350    |
| Megophrys_daweimontis       | KX811866   | KX812124   | KX811968    | KX812247    | KX812359    |
| Megophrys_wuliangshanensis  | KX811881   | KX812129   | KX811958    | KX812258    | KX812357    |
| Megophrys_omeimontis        | KX811884   | KX812136   | KX811967    | KX812223    | KX812347    |
| Megophrys_binchuanensis     | KX811848   | KX812111   | KX811951    | KX812218    | KX812337    |
| Megophrys_palpebralespinosa | KX811888   | KX812137   | KX811994    | KX812236    | KX812363    |
| Megophrys_huangshanensis    | KX811819   | KX812106   | KX811982    | KX812215    | KX812308    |
| Megophrys_boettgeri         | KX811814   | KX812104   | KX811980    | KX812213    | KX812305    |
| Megophrys_jinggangensis     | KX811840   | KX812108   | KX811986    | KX812242    | KX812328    |
| Megophrys_baolongensis      | KX811813   | KX812093   | KX811945    | KX812202    | KX812318    |
| Megophrys_tubero granulatus | KX811823   | KX812095   | KX811979    | KX812209    | KX812331    |
| Megophrys_wushanensis       | KX811838   | KX812094   | KX811984    | KX812203    | KX812319    |
| Megophrys lini              | KX811842   | KX812110   | KX811988    | KX812244    | KX812394    |
| Megophrys_brachykolos       | KX811897   | KX812150   | KX811985    | KX812217    | KX812395    |
| Megophrys_minor             | KX811896   | KX812145   | KX812045    | KX812253    | KX812325    |
| Megophrys_maosonensis       | KX811780   | KX812080   | KX812024    | KX812195    | KX812375    |
| Megophrys_mangshanensis     | KX811790   | KX812079   | KX812025    | KX812194    | KX812377    |
| Megophrys_major             | KX811769   | KX812090   | KX812015    | KX812186    | KX812372    |
| Megophrys_glandulosa        | KX811761   | KX812074   | KX812010    | KX812183    | KX812298    |
| Megophrys_medogensis        | KX811767   | KX812082   | KX812017    | KX812197    | KX812301    |
| Megophrys_zhangii           | KX811765   | KX812084   | KX812026    | KX812200    | KX812303    |
| Megophrys_parva             | KX811797   | KX812072   | KX812006    | KX812181    | KX812295    |
| Megophrys_montana           | KX811927   | KX812163   | KX811940    | KX812281    | KX812390    |
| Megophrys_nasuta            | KX811921   | KX812054   | KX811935    | KX812171    | KX812289    |
| Megophrys_stejnegeri        | KX811922   | KX812052   | KX811936    | KX812172    | KX812399    |
| Megophrys_ligayae           | KX811919   | KX812051   | KX811933    | KX812169    | KX812287    |
| Megophrys_wawuensis         | KX811902   | KX812062   | KX812041    | KX812271    | KX812314    |
| Megophrys_gigantica         | KX811898   | KX812058   | KX811941    | KX812270    | KX812312    |
| Megophrys_shapingensis      | KX811904   | KX812060   | KX811943    | KX812274    | KX812316    |
| Megophrys_aceras            | KX811925   | KX812159   | KX812030    | KX812262    | KX812310    |
| Megophrys_pachyproctus      | KX811908   | KX812153   | KX811998    | KX812265    | KX812383    |
| Megophrys_flavipunctata     | MH647518   | MH647536   | -           | MH647549    | -           |
| Megophrys_himalayana        | MH647527   | -          | -           | MH647554    | -           |
| Megophrys_oreocrypta        | MH647521   | -          | -           | MH647547    | -           |
| Megophrys_oropedion         | KY022317   | MH647534   | -           | KY022361    | -           |
| Megophrys_periosa           | MH647524   | MH647529   | -           | MH647555    | -           |
| Megophrys_serchhipii        | KY022323   | MH647532   | -           | KY022366    | -           |
| Megophrys_vegrandis         | KY022305   | MH647530   | -           | KY022349    | -           |

|                             |                 |                 |          |                 |          |
|-----------------------------|-----------------|-----------------|----------|-----------------|----------|
| Megophrys_zunhebotensis     | KY022322        | -               | -        | KY022368        | -        |
| Megophrys_ancrae            | KY022318        | MH647531        | -        | KY022350        | -        |
| Megophrys_robusta           | MH647513        | MH647535        | -        | KY022365        | -        |
| Megophrys_megacephala       | KY022315        | MH647533        | -        | KY022357        | -        |
| Ophryophryne_microstoma     | KX811914        | KX812156        | KX812039 | KX812277        | KX812397 |
| Ophryophryne_hansi          | KX811913        | KX812155        | KX812036 | KX812276        | KX812396 |
| Borneophrys_edwardinae      | KX811918        | KX812050        | KX811932 | KX812168        | KX812286 |
| Brachytarsophrys_carinense  | KX811811        | KX812057        | KX811939 | KX812268        | KX812392 |
| Brachytarsophrys_feae       | KX811810        | KX812056        | KX811938 | KX812269        | KX812393 |
| Leptolalax_oshanensis       | KX811928        | KX812166        | KX812048 | KX812284        | KX812402 |
| Leptolalax_ventripunctatus  | KX811929        | KX812167        | KX812049 | KX812285        | KX812403 |
| Scutiger_boulengeri         | KY310750        | KY310860        | -        | KY311026        | -        |
| Scutiger_chintingensis      | KY310769        | KY310878        | -        | EF397301        | -        |
| Scutiger_glandulatus        | KY310770        | KY310879        | -        | KY311044        | -        |
| Scutiger_mammatus           | KY310775        | KY310884        | -        | KY311050        | -        |
| Scutiger_nepalensis         | KY310776        | KY310885        | -        | KY311051        | -        |
| Scutiger_occidentalis       | -               | KY310901        | -        | KY311066        | -        |
| Scutiger_sikkimensis        | KY310802        | KY310905        | -        | KY311073        | -        |
| Scutiger_ningshanensis      | NC_031426       | NC_031426       | -        | -               | -        |
| Scutiger_spinosus           | -               | KU243055        | -        | -               | -        |
| Scutiger_liupanensis        | KX352261        | <b>MW021398</b> | -        | <b>MW111376</b> | -        |
| Scutiger_tuberculatus       | MF805589        | <b>MW021397</b> | -        | <b>MW111379</b> | -        |
| Scutiger_gongshanensis      | -               | <b>MW021395</b> | -        | <b>MW111380</b> | -        |
| Scutiger_nyingchiensis      | KY310796        | KU243056        | -        | <b>MW111377</b> | -        |
| Scutiger_wuguanfui          | -               | KU243061        | -        | <b>MW111378</b> | -        |
| Leptobranchium_bompu        | <b>MW111515</b> | -               | -        | -               | -        |
| Leptobranchium_bompu        | <b>MW111516</b> | -               | -        | -               | -        |
| Leptobranchium_hainanense   | AB530447        | JN700832        | -        | EF544338        | -        |
| Leptobranchium_banae        | AB530452        | -               | -        | EF544314        | -        |
| Leptobranchium_ngoclinhense | AB530450        | -               | -        | EF544360        | -        |
| Leptobranchium_boringii     | KX811930        | KX812164        | KX812046 | MH056123        | KX812400 |
| Leptobranchium_huashen      | KX811931        | KX812165        | MH056008 | MH056122        | MH056143 |
| Leptobranchium_smithi       | AB530432        | MG935560        | -        | -               | -        |
| Leptobranchium_hasseltii    | AB530422        | -               | -        | EF672278        | -        |
| Leptobranchium_hendricksoni | AB530418        | MG386477        | -        | -               | -        |
| <b>Outgroup</b>             |                 |                 |          |                 |          |
| Pelobates_syriacus          | AY236807        | -               | -        | KX208696        | -        |
| Pelobates_cultripis         | AJ871086        | AJ871086        | -        | AY323758        | -        |
| Pelobates_varaldii          | AY236808        | -               | -        | -               | AY341815 |
| Pelodytes_cf._punctatus     | NC_020000       | NC_020000       | JF703235 | AY583343        | -        |
| Pelodytes_ibericus          | JX564882        | JX564882        | -        | KX984226        | -        |
| Scaphiopus_hurterii         | AY236828        | -               | -        | EF535900        | -        |
| Scaphiopus_holbrookii       | AB612078        | KU985774        | AB612074 | AB612071        | DQ283852 |
| Scaphiopus_couchii          | AY236826        | -               | -        | KX208786        | AY323738 |

**Agamidae**

| <b>Species</b>                       | <b>ND1–ND2</b> | <b>RAG1</b> | <b>R35</b> | <b>ND4</b> | <b>Cytb</b> |
|--------------------------------------|----------------|-------------|------------|------------|-------------|
| <i>Amphibolurus_muricatus</i>        | AF128468       | -           | -          | -          | -           |
| <i>Chelosania_brunnea</i>            | AF128465       | JF806190    | JF804583   | -          | -           |
| <i>Ctenophorus_adelaidensis</i>      | AF128471       | JF806192    | JF804602   | -          | -           |
| <i>Ctenophorus_isolepis</i>          | AF375629       | JF806193    | JF804587   | -          | -           |
| <i>Diporiphora_nobbi</i>             | AY132999       | -           | -          | AY281164   | -           |
| <i>Diporiphora_winneckeii</i>        | AY133012       | -           | -          | -          | -           |
| <i>Intellagama_lesueurii</i>         | AF128466       | AY662581    | JF804599   | -          | -           |
| <i>Moloch_horridus</i>               | AF128467       | JF806197    | JF804595   | -          | -           |
| <i>Physignathus_cocincinus</i>       | U82690         | AY662582    | HQ876322   | -          | AB263945    |
| <i>Pogona_vitticeps</i>              | AY133026       | JF806200    | JF804600   | NC_006922  | NC_006922   |
| <i>Rankinia_diemensis</i>            | AF375619       | -           | -          | -          | -           |
| <i>Tympanocryptis_lineata</i>        | EU727400       | -           | -          | -          | -           |
| <i>Tympanocryptis_tetraporophora</i> | DQ529269       | -           | -          | -          | -           |
| <i>Chlamydosaurus_kingii</i>         | EF090489       | JF806191    | JF804584   | EF090423   | NC_009421   |
| <i>Hypsilurus_boydii</i>             | AY133013       | JF806196    | JF804592   | -          | -           |
| <i>Gowidon_temporalis</i>            | AY133002       | -           | -          | -          | -           |
| <i>Acanthocercus_atricollis</i>      | -              | -           | JX839080   | JX857596   | -           |
| <i>Agama_agama</i>                   | AF128504       | EU402825    | HQ876321   | AF443225   | -           |
| <i>Agama_anchietae</i>               | GQ242169       | -           | JX839094   | GU128483   | AF355566    |
| <i>Xenagama_taylori</i>              | NC_008065      | KP994938    | JX839174   | NC_008065  | NC_008065   |
| <i>Trapelus_agilis</i>               | AF128509       | JF806201    | JF804606   | -          | -           |
| <i>Trapelus_mutabilis</i>            | -              | -           | JX839170   | GU128501   | -           |
| <i>Pseudotrapelus_sinaitus</i>       | AF128507       | -           | JX839168   | NC_013603  | AB116956    |
| <i>Bufoniceps_laungwalaensis</i>     | DQ008214       | -           | -          | -          | -           |
| <i>Coryphophylax_subcristatus</i>    | -              | -           | -          | -          | -           |
| <i>Stellagama_stellio</i>            | AF128516       | -           | JX839166   | -          | -           |
| <i>Paralaudakia_caucasia</i>         | AF172705       | -           | -          | AY053998   | KF691617    |
| <i>Paralaudakia_himalayana</i>       | AF028676       | KJ363481    | -          | -          | -           |
| <i>Paralaudakia_lehmanni</i>         | GQ242233       | KJ363482    | -          | KF691670   | KF691618    |
| <i>Laudakia_wui</i>                  | -              | -           | -          | KU926290   | -           |
| <i>Laudakia_tuberculata</i>          | AF128514       | -           | -          | KU926285   | -           |
| <i>Laudakia_nupta</i>                | AF128513       | -           | -          | KF691667   | -           |
| <i>Laudakia_melanura</i>             | -              | -           | -          | KX131009   | -           |
| <i>Laudakia_sacra</i>                | AF128515       | -           | -          | KU926293   | -           |
| <i>Laudakia_papenfussi</i>           | -              | -           | -          | KU926288   | -           |
| <i>Phrynocephalus_arabicus</i>       | KF691651       | KJ363507    | -          | KF691675   | -           |
| <i>Phrynocephalus_axillaris</i>      | KC551439       | KC551397    | -          | KC551305   | KF691635    |
| <i>Phrynocephalus_erythrurus</i>     | GQ141231       | KJ363485    | -          | KF691684   | KF691632    |
| <i>Phrynocephalus_forsythii</i>      | KF691661       | KJ363484    | -          | AY054017   | KF691633    |
| <i>Phrynocephalus_frontalis</i>      | AY396592       | KC551407    | -          | KC551315   | AY053909    |
| <i>Phrynocephalus_guinanensis</i>    | KC551454       | KC551412    | -          | KC551320   | -           |

|                                |                 |          |          |           |          |
|--------------------------------|-----------------|----------|----------|-----------|----------|
| Phrynocephalus_guttatus        | GQ242203        | KJ363491 | -        | KF691693  | KF691640 |
| Phrynocephalus_helioscopus     | KF691658        | KJ363502 | -        | KF691683  | KF691630 |
| Phrynocephalus_interscapularis | AF128517        | KJ363510 | -        | KF691671  | KF691620 |
| Phrynocephalus_maculatus       | KF691650        | -        | -        | KF691674  | KF691623 |
| Phrynocephalus_mystaceus       | AF128518        | GQ242237 | JF804596 | AY054055  | KF691626 |
| Phrynocephalus_reticulatus     | KF691652        | KJ363503 | -        | KF691676  | KF691624 |
| Phrynocephalus_ornatus         | KF691649        | KJ363509 | -        | KF691673  | KF691622 |
| Phrynocephalus_persicus        | KF691657        | KJ363500 | -        | KF691681  | KF691631 |
| Phrynocephalus_przewalskii     | AY396586        | KJ363495 | -        | AY054061  | AY053941 |
| Phrynocephalus_putjatai        | HM629331        | KJ363487 | -        | KF691686  | KF691634 |
| Phrynocephalus_raddei          | KF691653        | KJ363504 | -        | KF691678  | KF691625 |
| Phrynocephalus_rossikowi       | -               | -        | -        | MG739301  | MG739302 |
| Phrynocephalus_scutellatus     | KF691655        | KJ363508 | -        | KF691677  | KF691619 |
| Phrynocephalus_strauchi        | KF691654        | KJ363505 | -        | KF691679  | -        |
| Phrynocephalus_theobaldi       | KC551462        | KC551419 | -        | KC551328  | -        |
| Phrynocephalus_versicolor      | KF691664        | KJ363497 | -        | KF691696  | KF691641 |
| Phrynocephalus_vlangualii      | EF375649        | -        | -        | EU294095  | -        |
| Draco_biaro                    | AF288277        | -        | -        | -         | -        |
| Draco_bimaculatus              | AF288241        | -        | -        | -         | -        |
| Draco_blanfordii               | AF288242        | JF806194 | JF804589 | -         | -        |
| Draco_cornutus                 | AF288244        | -        | -        | -         | -        |
| Draco_dussumieri               | -               | -        | -        | -         | -        |
| Draco_haematopogon             | AF288259        | -        | -        | -         | -        |
| Draco_lineatus                 | -               | -        | -        | -         | -        |
| Draco_maculatus                | AF288248        | -        | -        | -         | -        |
| Draco_maximus                  | AF288231        | -        | -        | -         | -        |
| Draco_melanopogon              | AF288258        | -        | -        | -         | -        |
| Draco_obscurus                 | AF288250        | -        | -        | -         | -        |
| Draco_quinquefasciatus         | AF288232        | -        | -        | -         | -        |
| Draco_taeniopterus             | AF288251        | -        | -        | -         | -        |
| Draco_volans                   | AF288267        | -        | -        | AF443226  | -        |
| Ptyctolaemus_collicristatus    | AY555837        | -        | -        | -         | -        |
| Ptyctolaemus_gularis           | <b>MW111456</b> | -        | -        | -         | -        |
| Calotes_calotes                | AF128482        | AY662584 | -        | -         | AB263941 |
| Calotes_ceylonensis            | AF128483        | -        | -        | -         | -        |
| Calotes_emma                   | DQ289460        | JF806189 | JF804581 | -         | -        |
| Calotes_htunwini               | DQ289464        | -        | -        | -         | -        |
| Calotes_jerdoni                | GQ502783        | -        | -        | -         | -        |
| Calotes_medogensis             | <b>MW111455</b> | -        | -        | -         | -        |
| Calotes_mystaceus              | AF128487        | -        | -        | -         | -        |
| Calotes_versicolor             | DQ289478        | -        | -        | NC_009683 | AY572870 |
| Calotes_chincollium            | DQ289459        | -        | -        | -         | -        |
| Calotes_irawadi                | DQ289468        | -        | -        | -         | -        |
| Calotes_minor                  | KT952396        | KT952398 | -        | -         | -        |

|                            |                 |          |          |           |          |
|----------------------------|-----------------|----------|----------|-----------|----------|
| Japalura_andersoniana      | MK001394        | -        | MK001445 | -         | -        |
| Japalura_kumaonensis       | MK001396        | -        | MK001479 | -         | -        |
| Japalura_tricarinata       | AF128478        | AY662585 | MK001480 | -         | -        |
| Japalura_variegata         | AF128479        | -        | -        | -         | -        |
| Pseudocalotes_bapoensis    | MK001436        | -        | MK001453 | -         | -        |
| Cristidorsa_otai           | MK0014101       | -        | MK001441 | -         | -        |
| Cristidorsa_planidorsata   | MK001400        | -        | MK001442 | -         | -        |
| Diploderma_batangensis     | MK001412        | -        | -        | -         | -        |
| Diploderma_brevipes        | MK001429        | -        | MK001464 | -         | -        |
| Diploderma_chapaensis      | MG214262        | -        | MK001474 | -         | -        |
| Diploderma_dymondi         | MK001422        | -        | MK001477 | -         | -        |
| Diploderma_flaviceps       | MK001416        | -        | MK001472 | -         | -        |
| Diploderma_iadinum         | <b>MW111458</b> | -        | -        | -         | -        |
| Diploderma_laeviventris    | MK001407        | -        | MK001466 | -         | -        |
| Diploderma_luei            | MK001433        | -        | MK001462 | -         | -        |
| Diploderma_makii           | MK001431        | -        | MK001460 | -         | -        |
| Diploderma_micangshanensis | MK001424        | -        | MK001452 | -         | -        |
| Diploderma_polygonata      | MK001427        | -        | MK001458 | -         | -        |
| Diploderma_slowinskii      | MK001405        | -        | -        | -         | -        |
| Diploderma_splendidum      | MK001418        | -        | MK001476 | -         | -        |
| Diploderma_swinhoni        | MK001419        | -        | MK001456 | -         | -        |
| Diploderma_varcoae         | <b>MW111459</b> | -        | -        | -         | -        |
| Diploderma_vela            | MK001414        | -        | MK001448 | -         | -        |
| Diploderma_yulongense      | MK001410        | -        | MK001450 | -         | -        |
| Diploderma_yunnanense      | MK001409        | -        | MK001469 | -         | -        |
| Diploderma_zhaoermii       | MK001425        | -        | MK001467 | -         | -        |
| Mictopholis_austeniana     | <b>MW111457</b> | -        | -        | -         | -        |
| Pseudocalotes_brevipes     | AF128502        | MG599031 | -        | KY884011  | AY572869 |
| Sarada_deccanensis         | KT831315        | KT831296 | KT831279 | -         | -        |
| Sitana_sivalensis          | MG641403        | MG641352 | MG641310 | -         | -        |
| Sitana_ponticeriana        | KT831326        | KT831304 | KT831286 | -         | -        |
| Sitana_spinaecephalus      | KT831336        | KT831309 | KT831290 | -         | -        |
| Sitana_laticeps            | KT831323        | KT831302 | KT831284 | -         | -        |
| Sitana_visiri              | KT831340        | KT831312 | KT831293 | -         | -        |
| Sitana_marudhamneydhal     | KX371915        | MG641332 | KX371918 | -         | -        |
| Otocryptis_beddomei        | MG650165        | MG641363 | MG641324 | -         | -        |
| Acanthosaura_armata        | NC_014175       | -        | -        | NC_014175 | AY572872 |
| Acanthosaura_lepidogaster  | AF128499        | JF806187 | JF804578 | -         | AY572923 |
| Salea_horsfieldii          | AF128490        | MG599032 | -        | -         | -        |
| Mantheyus_phuwuanensis     | AY555836        | FJ356735 | -        | -         | -        |
| Ceratophora_aspera         | AF128491        | -        | -        | -         | -        |
| Lyriocephalus_scutatus     | AF364052        | MG599029 | -        | -         | -        |
| Aphanotis_fusca            | AF288228        | -        | -        | -         | -        |
| Gonocephalus_grandis       | AF128496        | -        | -        | -         | AB263939 |



|                            |                |              |             |            |            |
|----------------------------|----------------|--------------|-------------|------------|------------|
| Bronchocela_cristatella    | AF288229       | -            | -           | -          | -          |
| Hydrosaurusamboinensis     | NC_014178      | JF806195     | JF804591    | NC_014178  | NC_014178  |
| Leiolepisbelliana          | U82689         | AY662587     | HQ876324    | -          | -          |
| Leiolepisguttata           | NC_014179      | -            | -           | NC_014179  | NC_014179  |
| Uromastyxacanthinura       | AB113801       | AY988025     | -           | -          | AB474753   |
| Uromastyxaegyptia          | AB113806       | -            | -           | AF443224   | AB116942   |
| Saarahardwickii            | AB113803       | GU457972     | HQ876325    | -          | AB474757   |
| <b>Outgroup</b>            |                |              |             |            |            |
| Brookesiabrygooi           | FJ975191       | JF806188     | JF804580    | FJ981800   | -          |
| Chamaeleocalyptratus       | AF448744       | GU457970     | HQ876323    | HF570566   | -          |
| Phrynosomacornutum         | DQ385344       | FJ356738     | -           | U66224     | AY141087   |
| Phrynosomaplatyrhinus      | DQ385354       | DQ385419     | JF804597    | JN809350   | EU543746   |
| Umascoparia                | AF049861       | JF806214     | JF804608    | -          | EU543750   |
| Utastansburiana            | AF049863       | DQ385422     | JF804610    | JX481607   | JX481462   |
| Petrosaurusmearnsi         | JN648436       | GQ896005     | HQ876333    | AF210354   | GQ272777   |
| Sceloporusgraciosus        | AF049860       | EU085722     | GQ464646    | EU085839   | KC853847   |
| Crotaphytuscollaris        | EU038620       | FJ356749     | JF804586    | EU085839   | KC853847   |
| Gambeliawislizenii         | NC_012831      | AY662600     | HQ876327    | KC621497   | EU116511   |
| Brachylophusfasciatus      | AF528721       | AY988026     | JF804579    | U66238     | KX610572   |
| Dipsosaurusdorsalis        | AF049857       | FJ356747     | HQ876329    | KX579001   | KX610606   |
| Sauromalusater             | U82687         | AY662591     | JF804603    | HM352518   | KX610613   |
| Polychrusmarmoratus        | NC_012839      | FJ356748     | HQ876335    | NC_012839  | MH221669   |
| Leiocephalusbarahonensis   | EF591774       | -            | DQ119622    | -          | KU710319   |
| Anoliscarolinensis         | NC_010972      | FJ356739     | HQ876334    | EU747728.2 | EU747728.2 |
| Basiliscusvittatus         | NC_012829      | -            | -           | NC_012829  | NC_012829  |
| Corytophanescristatus      | AF528717       | JF806205     | JF804585    | -          | -          |
| Stenocercusguentheri       | DQ080223       | HQ876440     | HQ876337    | -          | -          |
| Tropidurushispidus         | AY625154       | AY988013     | -           | -          | KU245065   |
| Uranoscodonsuperciliosus   | AF528749       | JF806215     | JF804609    | -          | KU245082   |
| Enyalioideslaticeps        | EU586748       | EU586773     | JF804590    | U66226     | -          |
| Morunasaurusannularis      | EU586758       | FJ356741     | HQ876328    | -          | -          |
| Liolaemusbellii            | AF099223       | HQ876436     | HQ876331    | -          | MH178577   |
| Phymaturusindistinctus     | AY661893       | -            | -           | AY367851.2 | MH923556   |
| Chalarodonmadagascariensis | AB266748       | FJ356745     | JF804582    | NC_012836  | NC_012836  |
| Opluruscuvieri             | U82685         | AY662601     | -           | U66225     | KY942063   |
| Urostrophusvautieri        | AF528734       | HQ876435     | HQ876330    | KM517830   | KT342907   |
| Leiosauruscatamarcensis    | AF528731       | JF806207     | JF804594    | -          | KT342892   |
| Pristidactylustorquatus    | -              | JF806210     | JF804601    | -          | KT342906   |
| <b>Species</b>             | <b>12s-16s</b> | <b>C-mos</b> | <b>BDNF</b> |            |            |
| Amphibolurusmuricatus      | -              | AF137523     | DQ340701    |            |            |
| Chelosaniabrunnea          | -              | DQ340664     | JF806006    |            |            |
| Ctenophorusadelaidensis    | -              | DQ340692     | JF806008    |            |            |
| Ctenophorusisolepis        | -              | DQ340671     | DQ340715    |            |            |
| Diporiphoranobbi           | -              | DQ340661     | DQ340702    |            |            |

|                               |                       |          |          |
|-------------------------------|-----------------------|----------|----------|
| Diporiphora_winneckeii        | -                     | DQ340680 | DQ340725 |
| Intellagama_lesueurii         | AB031974-<br>AB031991 | DQ340689 | DQ340737 |
| Moloch_horridus               | -                     | DQ340697 | DQ340746 |
| Physignathus_cocincinus       | AF236822-<br>AB031990 | AY987991 | HQ876215 |
| Pogona_vitticeps              | AB166795-<br>AB031992 | DQ340691 | DQ340739 |
| Rankinia_diemensis            | -                     | DQ340693 | DQ340741 |
| Tympanocryptis_lineata        | -                     | DQ340694 | DQ340742 |
| Tympanocryptis_tetraporophora | EF081041              | DQ340695 | DQ340743 |
| Chlamydosaurus_kingii         | EF090423-<br>EF090423 | DQ340665 | DQ340708 |
| Hypsilurus_boydii             | -                     | DQ340682 | DQ340727 |
| Gowidon_temporalis            | AB031970-<br>AB031987 | DQ340662 | DQ340703 |
| Acanthocercus_atricollis      | JX668130              | JX838888 | -        |
| Agama_agama                   | GU133310              | AF137530 | EU402615 |
| Agama_anchietae               | AF355524              | JX838905 | -        |
| Xenagama_taylori              | GU128466              | JX838994 | -        |
| Trapelus_agilis               | HQ901109              | -        | JF806016 |
| Trapelus_mutabilis            | GU128465              | -        | -        |
| Pseudotrapelus_sinaitus       | NC_013603             | -        | -        |
| Bufoniceps_laungwalaensis     | -                     | -        | -        |
| Coryphophylax_subcristatus    | EU502966-<br>EU503021 | -        | -        |
| Stellagama_stellio            | GU952115-<br>GU128464 | -        | -        |
| Paralaudakia_caucasia         | AY053643-<br>AY053765 | DQ340686 | DQ340732 |
| Paralaudakia_himalayana       | -                     | -        | KJ363402 |
| Paralaudakia_lehmanni         | -                     | -        | -        |
| Laudakia_wui                  | -                     | -        | -        |
| Laudakia_tuberculata          | HM040916-<br>HM921190 | -        | -        |
| Laudakia_nupta                | HQ901100              | -        | -        |
| Laudakia_melanura             | -                     | -        | -        |
| Laudakia_sacra                | -                     | -        | -        |
| Laudakia_papenfussi           | -                     | -        | -        |
| Phrynocephalus_arabicus       | -                     | -        | KJ363434 |
| Phrynocephalus_axillaris      | AY053656-<br>AY053779 | -        | KJ363410 |
| Phrynocephalus_erythrurus     | -                     | -        | KJ363406 |
| Phrynocephalus_forsythii      | AY053659-             | -        | KJ363405 |

|                                |                       |          |          |
|--------------------------------|-----------------------|----------|----------|
|                                | AY053784              |          |          |
| Phrynocephalus_frontalis       | -                     | -        | KJ363409 |
| Phrynocephalus_guinanensis     | -                     | -        | -        |
| Phrynocephalus_guttatus        | AY053678-<br>AY053800 | -        | KJ363414 |
| Phrynocephalus_helioscopus     | AY053682-<br>AY053817 | -        | KJ363426 |
| Phrynocephalus_interscapularis | -                     | -        | KJ363436 |
| Phrynocephalus_maculatus       | -                     | -        | KJ363433 |
| Phrynocephalus_mystaceus       | AY053700-<br>AY053822 | AF137527 | DQ340735 |
| Phrynocephalus_reticulatus     | -                     | -        | KJ363428 |
| Phrynocephalus_ornatus         | -                     | -        | KJ363435 |
| Phrynocephalus_persicus        | -                     | -        | KJ363424 |
| Phrynocephalus_przewalskii     | AY053702-<br>AY053828 | -        | KJ363419 |
| Phrynocephalus_putjatai        | -                     | -        | KJ363408 |
| Phrynocephalus_raddei          | -                     | -        | KJ363429 |
| Phrynocephalus_rossikowi       | -                     | -        | -        |
| Phrynocephalus_scutellatus     | -                     | -        | -        |
| Phrynocephalus_strauchi        | -                     | -        | KJ363430 |
| Phrynocephalus_theobaldi       | -                     | -        | -        |
| Phrynocephalus_versicolor      | -                     | -        | KJ363421 |
| Phrynocephalus_vlangalii       | AY053749-<br>AY053880 | -        | AF497714 |
| Draco_biaro                    | -                     | -        | -        |
| Draco_bimaculatus              | -                     | -        | -        |
| Draco_blanfordii               | AB023733-<br>AB023751 | -        | JF806010 |
| Draco_cornutus                 | AB023729-<br>AB023752 | -        | -        |
| Draco_dussumieri               | AB023734-<br>AB023753 | -        | -        |
| Draco_haematopogon             | AB023736-<br>AB023755 | -        | -        |
| Draco_lineatus                 | AB023738-<br>AB023757 | -        | -        |
| Draco_maculatus                | AB023739-<br>AB023758 | -        | -        |
| Draco_maximus                  | AB023740-<br>AB023760 | -        | -        |
| Draco_melanopogon              | AB023742-<br>AB023762 | -        | -        |
| Draco_obscurus                 | AB023744-             | -        | -        |

|                             |           |          |          |
|-----------------------------|-----------|----------|----------|
|                             | AB023764  |          |          |
| Draco_quinquefasciatus      | AB023745- | -        | -        |
|                             | AB023766  |          |          |
| Draco_taeniopterus          | AB023747- | -        | -        |
|                             | AB023767  |          |          |
| Draco_volans                | AB023731- | -        | -        |
|                             | AB023770  |          |          |
| Ptyctolaemus_collicristatus | -         | -        | -        |
| Ptyctolaemus_gularis        | -         | -        | -        |
| Calotes_calotes             | -         | -        | -        |
| Calotes_ceylonensis         | -         | -        | -        |
| Calotes_emma                | -         | -        | JF806005 |
| Calotes_htunwini            | -         | -        | -        |
| Calotes_jerdoni             | -         | -        | -        |
| Calotes_medogensis          | -         | -        | -        |
| Calotes_mystaceus           | -         | -        | -        |
| Calotes_versicolor          | AB183287- | AF137525 | DQ340705 |
|                             | AB031981  |          |          |
| Calotes_chincollium         | -         | -        | -        |
| Calotes_irawadi             | -         | -        | -        |
| Calotes_minor               | -         | -        | -        |
| Japalura_andersoniana       | -         | MK001486 | MK001556 |
| Japalura_kumaonensis        | -         | -        | -        |
| Japalura_tricarinata        | -         | MK001491 | MK001560 |
| Japalura_variegata          | -         | -        | -        |
| Pseudocalotes_bapoensis     | -         | MK001503 | MK001550 |
| Cristidorsa_otai            | -         | -        | -        |
| Cristidorsa_planidorsata    | -         | -        | -        |
| Diploderma_batangensis      | -         | -        | -        |
| Diploderma_brevipes         | -         | MK001506 | MK001540 |
| Diploderma_chapaensis       | -         | MK001494 | MK001526 |
| Diploderma_dymondi          | -         | MK001513 | MK001545 |
| Diploderma_flaviceps        | -         | MK001512 | MK001528 |
| Diploderma_iadinum          | -         | -        | -        |
| Diploderma_laeviventris     | -         | -        | MK001529 |
| Diploderma_luei             | -         | MK001510 | MK001532 |
| Diploderma_makii            | -         | MK001508 | MK001536 |
| Diploderma_micangshanensis  | -         | -        | MK001559 |
| Diploderma_polygonata       | -         | MK001515 | MK001538 |
| Diploderma_slowinskii       | -         | -        | -        |
| Diploderma_splendidum       | -         | MK001492 | MK001522 |
| Diploderma_swinhoni         | -         | MK001495 | MK001534 |
| Diploderma_varcoae          | -         | MK001493 | MK001523 |
| Diploderma_vela             | -         | MK001499 | MK001530 |

|                                  |                       |          |          |
|----------------------------------|-----------------------|----------|----------|
| <i>Diploderma_yulongense</i>     | -                     | MK001498 | MK001542 |
| <i>Diploderma_yunnanense</i>     | -                     | MK001517 | MK001524 |
| <i>Diploderma_zhaoermii</i>      | -                     | MK001500 | MK001547 |
| <i>Mictopholis_austeniana</i>    | -                     | -        | -        |
| <i>Pseudocalotes_brevipes</i>    | -                     | -        | -        |
| <i>Sarada_deccanensis</i>        | -                     | -        | -        |
| <i>Sitana_sivalensis</i>         | -                     | -        | -        |
| <i>Sitana_ponticeriana</i>       | -                     | -        | -        |
| <i>Sitana_spinaecephalus</i>     | -                     | -        | -        |
| <i>Sitana_laticeps</i>           | -                     | -        | -        |
| <i>Sitana_visiri</i>             | -                     | -        | -        |
| <i>Sitana_marudhamneydhal</i>    | -                     | -        | -        |
| <i>Otocryptis_beddomei</i>       | -                     | -        | -        |
| <i>Acanthosaura_armata</i>       | NC_014175             | -        | -        |
| <i>Acanthosaura_lepidogaster</i> | -                     | -        | JF806003 |
| <i>Salea_horsfieldii</i>         | -                     | -        | -        |
| <i>Mantheyus_phuwuanensis</i>    | AB023750-<br>AB023772 | -        | -        |
| <i>Ceratophora_aspera</i>        | -                     | -        | -        |
| <i>Lyriocephalus_scutatus</i>    | -                     | -        | -        |
| <i>Aphaniotis_fusca</i>          | AB023749-<br>AB023771 | -        | -        |
| <i>Gonocephalus_grandis</i>      | AB031966-<br>AB031983 | -        | -        |
| <i>Bronchocela_cristatella</i>   | EU503024              | -        | -        |
| <i>Hydrosaurusamboinensis</i>    | NC_014178             | -        | JF806011 |
| <i>Leiolepis_belliana</i>        | AB031969-<br>AB031986 | FJ984253 | HQ876216 |
| <i>Leiolepis_guttata</i>         | NC_014179             | -        | -        |
| <i>Uromastyx_acanthinura</i>     | FJ639598              | AY987992 | AY987979 |
| <i>Uromastyx_aegyptia</i>        | AB031977-<br>AB031994 | AF137531 | -        |
| <i>Saara_hardwickii</i>          | FJ639591              | -        | GU457849 |
| <b>Outgroup</b>                  |                       |          |          |
| <i>Brookesia_brygooi</i>         | HF570400              | FJ984306 | JF806004 |
| <i>Chamaeleo_calypttratus</i>    | HF570443              | HF570667 | GU457847 |
| <i>Phrynosoma_cornutum</i>       | DQ385390              | AY987989 | KR360458 |
| <i>Phrynosoma_platyrhinos</i>    | DQ385401              | -        | DQ385330 |
| <i>Uma_scoparia</i>              | AF194260              | -        | JF806029 |
| <i>Uta_stansburiana</i>          | GQ464578              | AF315389 | JN648395 |
| <i>Petrosaurus_mearnsi</i>       | L41450                | -        | HQ876221 |
| <i>Sceloporus_graciosus</i>      | AF440090              | -        | EU085928 |
| <i>Crotaphytus_collaris</i>      | L41443                | AY987985 | JF806021 |
| <i>Gambelia_wislizenii</i>       | AY217995              | AY217842 | KP820845 |

|                             |            |          |          |
|-----------------------------|------------|----------|----------|
| Brachylophus_fasciatus      | -          | AY987993 | JF806018 |
| Dipsosaurus_dorsalis        | KC621331   | AF148705 | GQ853275 |
| Sauromalus_ater             | -          | HM352537 | JF806026 |
| Polychrus_marmoratus        | AF338329   | AY987983 | AY987966 |
| Leiocephalus_barahonensis   | U39564.2   | DQ119594 | HQ876223 |
| Anolis_carolinensis         | EU747728.2 | -        | EU402616 |
| Basiliscus_vittatus         | NC_012829  | -        | -        |
| Corytophanes_cristatus      | -          | AF315390 | JF806020 |
| Stenocercus_guentheri       | L41481     | -        | HQ876224 |
| Tropidurus_hispidus         | U39563     | AY987984 | AY987967 |
| Uranoscodon_superciliosus   | AF362543   | -        | JF806030 |
| Enyalioides_laticeps        | KY982512   | -        | GU457848 |
| Morunasaurus_annularis      | -          | -        | HQ876218 |
| Liolaemus_bellii            | AY662069   | -        | HQ876220 |
| Phymaturus_indistinctus     | AY367823   | AY367880 | -        |
| Chalarodon_madagascariensis | NC_012836  | AY987987 | JF806019 |
| Oplurus_cuvieri             | U39587     | EU099681 | AY987971 |
| Urostrophus_vautieri        | KM517592   | -        | HQ876219 |
| Leiosaurus_catamarcensis    | AF338341   | -        | JF806022 |
| Pristidactylus_torquatus    | KT342933   | -        | JF806025 |

---

## Elapidae

| <b>Species</b>              | <b>Cytb</b> | <b>ND4</b> | <b>12s</b> | <b>16s</b> | <b>C-mos</b> |
|-----------------------------|-------------|------------|------------|------------|--------------|
| Acanthophis_praelongus      | AY340135    | AY340164   | EU547112   | EU547161   | EU546926     |
| Aipysurus_laevis            | DQ233922    | EF506638   | EU547132   | DQ233997   | EU546945     |
| Aspidomorphus_muelleri      | AF217814    | EU546999   | EU547090   | EU547139   | EU366448     |
| Austrelaps_superbus         | AF217815    | EU547030   | EU547127   | EU547176   | EU546940     |
| Brachyurophis_semifasciatus | EU547058    | EU547012   | EU547107   | EU547156   | EU546922     |
| Cacophis_squamulosus        | EU547052    | EU547007   | EU547101   | EU547150   | EU366451     |
| Demansia_papuensis          | EU547044    | EU547002   | EU547093   | EU547142   | EU546910     |
| Denisonia_devisi            | EU547071    | EU547023   | EU547120   | EU547169   | EU546933     |
| Drysdalia_coronoides        | EU547075    | EU547027   | EU547124   | EU547173   | EU546937     |
| Echiopsis_curta             | EU547072    | EU547024   | EU547121   | EU547170   | EU546934     |
| Elapognathus_coronatus      | EU547069    | EU547021   | EU547118   | EU547167   | EU546931     |
| Emydocephalus_annulatus     | EU547087    | EU547038   | EU547136   | EU547185   | EU546947     |
| Ephalophis_greyae           | KC014392    | KC014466   | -          | KC014318   | -            |
| Furina_diadema              | EU547053    | EU547008   | EU547102   | EU547151   | EU546917     |
| Hemiaspis_dameli            | DQ233952    | EU547025   | EU547122   | EU547171   | EU546935     |
| Hoplocephalus_bitorquatus   | EU547079    | EU547031   | EU547128   | EU547177   | EU546941     |
| Hydrelaps_darwiniensis      | EU547084    | EU547035   | EU547133   | EU547182   | EU546946     |
| Hydrophis_cyanocinctus      | DQ233946    | FJ593215   | -          | DQ234032   | FJ587189     |
| Micropechis_ikaheka         | AF217826    | EU547000   | EU547091   | EU547140   | EU366449     |
| Neelaps_calonotus           | EU547060    | EF210841   | EU547109   | EU547158   | EU546923     |
| Notechis_scutatus           | AF217836    | EU547034   | U96802     | -          | EU546944     |
| Oxyuranus_microlepidotus    | EU547050    | EF210823   | EU547099   | EU547148   | EU366450     |
| Paroplocephalus_atriceps    | EU547080    | EU547032   | EU547129   | EU547178   | EU546942     |
| Parahydrophis_mertoni       | DQ233974    | FJ593201   | -          | DQ234048   | FJ587177     |
| Parasuta_monachus           | EU547067    | EU547019   | EU547116   | EU547165   | EU546929     |
| Pseudechis_australis        | AY343091    | AY340177   | AJ749363   | EU547144   | EU546912     |
| Pseudonaja_textilis         | EU547048    | DQ098645   | EU547097   | EU547146   | EU546914     |
| Rhinoplocephalus_bicolor    | EU547068    | EU547020   | EU547117   | EU547166   | EU546930     |
| Simoselaps_anomalus         | EU547061    | EU547014   | EU547110   | EU547159   | EU546924     |
| Suta_suta                   | EU547066    | EU547018   | EU547115   | EU547164   | EU366452     |
| Toxicocalamus_preussi       | AF217825    | EU547001   | EU547092   | EU547141   | EU546909     |
| Tropidechis_carinatus       | EU547081    | EU547033   | EU547130   | EU547179   | EU546943     |
| Vermicella_intermedia       | EU547055    | EF210842   | EU547104   | EU547153   | EU546919     |
| Aspidelaps_scutatus         | KX694861    | -          | KX694563   | KX694617   | KX694796     |
| Bungarus_bungaroides        | AJ748689    | AJ830218   | -          | -          | -            |
| Bungarus_caeruleus          | AJ749305    | AJ830220   | -          | -          | -            |
| Bungarus_candidus           | AJ749343    | AJ830255   | JN687932   | JN687933   | -            |
| Bungarus_ceylonicus         | KC347466    | KC347501   | KC347316   | KC347350   | KC347390     |
| Bungarus_fasciatus          | EU547086    | EU547037   | EU547135   | EU547184   | EU366447     |
| Bungarus_flaviceps          | AJ749351    | AJ830251   | -          | -          | -            |
| Bungarus_multicinctus       | AJ749345    | NC 011392  | EU579522   | EF520682   | AF435021     |

|                           |                 |                 |                 |                 |          |
|---------------------------|-----------------|-----------------|-----------------|-----------------|----------|
| Bungarus_niger            | AJ749304        | AJ830241        | -               | -               | -        |
| Bungarus_sindanus         | AJ749346        | AJ830242        | -               | -               | -        |
| Bungarus_slowinskii       | AJ749306        | AJ830250        | -               | -               | -        |
| Calliophis_melanurus      | KC347458        | KC347502        | KC347317        | KC347351        | KC347391 |
| Calliophis_bivirgata      | AF217812        | AY058979        | U96800          | -               | AY058934 |
| Calliophis_bibroni        | KX573695        | -               | -               | -               | -        |
| Calliophis_castoe         | KX573696        | JQ282155        | -               | -               | -        |
| Calliophis_intestinalis   | -               | KX130761        | -               | -               | -        |
| Calliophis_nigrescens     | -               | JQ282156        | -               | -               | -        |
| Cryptophis_nigrescens     | EU547070        | EU547022        | EU547119        | EU547168        | EU546932 |
| Dendroaspis_angusticeps   | JF357936        | JF357927        | AF544764        | JF357945        | AF544735 |
| Elapsoidea_semiannulata   | AF039260        | JF357928        | AF544745        | JF357946        | AF544678 |
| Hemachatus_haemachatus    | AF217821        | -               | U96797          | -               | -        |
| Hemibungarus_calligaster  | EF137411        | EF137403        | -               | -               | EF137419 |
| Laticauda_colubrina       | AF217834        | EU546998        | EU547089        | EU547138        | AY058932 |
| Micruroides_euryxanthus   | AF217823        | -               | Z46433          | Z46483          | -        |
| Micrurus_surinamensis     | EF137415        | EF137407        | AF544770        | AF544799        | AF544708 |
| Naja_kaouthia             | <b>MW111477</b> | <b>MW111432</b> | <b>MW020355</b> | <b>MW019917</b> | AY058938 |
| Naja_atra                 | <b>MW111478</b> | <b>MW111433</b> | <b>MW020356</b> | <b>MW019918</b> | -        |
| Naja_annulata             | AY188010        | AY058970        | -               | AY188049        | AY187971 |
| Naja_siamensis            | AB920242        | -               | JN687926        | JN687927        | -        |
| Naja_sumatrana            | AB920240        | -               | JN687928        | JN687929        | -        |
| Naja_naja                 | DQ272477        | DQ897690        | NC_010225       | GQ359756        | AF435020 |
| Naja_haje                 | AY611994        | GQ359585        | GQ359666        | AY611811        | AY611903 |
| Naja_annulifera           | AF155216        | GQ359586        | GQ359667        | GQ359753        | -        |
| Naja_nivea                | AF217827        | AY058983        | EU624238        | GQ359755        | AY058939 |
| Naja_ashei                | GQ359493        | GQ359575        | GQ359656        | GQ359742        | -        |
| Naja_mossambica           | GQ359495        | GQ359577        | GQ359658        | GQ359744        | -        |
| Naja_nigricollis          | AF399746        | DQ897697        | EU624237        | GQ359754        | -        |
| Naja_katiensis            | GQ359494        | GQ359576        | GQ359657        | GQ359743        | -        |
| Naja_pallida              | AF399750        | DQ897714        | GQ359659        | GQ359745        | -        |
| Naja_nubiae               | AF399752        | DQ897718        | GQ359660        | GQ359746        | -        |
| Naja_melanoleuca          | -               | JF357931        | U96801          | JF357949        | -        |
| Naja_multifasciata        | AF217837        | AY058985        | -               | -               | AY058941 |
| Ophiophagus_hannah        | EF694840        | NC_011394       | EU921899        | NC_011394       | AY058940 |
| Sinomicrurus_japonicus    | AF217831        | AY058971        | D31615          | -               | AY058926 |
| Sinomicrurus_kelloggii    | EF137417        | EF137409        | -               | -               | EF137424 |
| Sinomicrurus_maclellandii | EF137418        | EF137410        | D31616          | -               | EF137425 |
| Walterinnesia_aegyptia    | AF217838        | AY058988        | U96807          | -               | AY058943 |
| <b>Outgroup</b>           |                 |                 |                 |                 |          |
| Eryx_miliaris             | U69824          | AF302942        | AF544746        | -               | AF544683 |
| Boa_constrictor           | AB177354        | AB177354        | AB177354        | AB177354        | AF471115 |
| Eunectes_notaeus          | AM236347        | AM236347        | AM236347        | AM236347        | -        |
| Psammophis_lineatus       | DQ486428        | EU526861        | FJ404152        | FJ404216        | FJ404256 |



|                                     |           |           |           |           |          |
|-------------------------------------|-----------|-----------|-----------|-----------|----------|
| <i>Compsophis albiventris</i>       | AY188011  | FJ404351  | FJ404149  | AY188050  | AY187972 |
| <i>Sistrurus catenatus</i>          | AY223610  | AF156575  | HQ257513  | AF259119  | JN090134 |
| <i>Crotalus atrox</i>               | AY223608  | DQ679856  | AF259258  | AF057272  | JN090135 |
| <i>Crotalus viridis</i>             | AF471066  | AF194157  | DQ020029  | AF259145  | AF471135 |
| <i>Vipera ursinii</i>               | -         | EF012798  | EF012817  | -         | AF433658 |
| <i>Bitis arietans</i>               | AY235728  | EU852304  | EU852316  | JF357953  | -        |
| <i>Trimeresurus trigonocephalus</i> | KC347488  | AY059597  | KC347336  | KC347374  | -        |
| <i>Pareas carinatus</i>             | JQ598940  | -         | AF544773  | AF544802  | AF544692 |
| <i>Achalinus meiguensis</i>         | FJ424614  | FJ424614  | FJ424614  | FJ424614  | -        |
| <i>Acrochordus granulatus</i>       | AB177879  | AB177879  | AB177879  | AB177879  | AF471124 |
| <i>Acrochordus javanicus</i>        | -         | HM234055  | AF512745  | Z46502    | HM234058 |
| <i>Anilius scytale</i>              | NC_014343 | NC_014343 | NC_014343 | NC_014343 | AF544722 |
| <i>Cylindrophis maculatus</i>       | -         | -         | KC347320  | KC347355  | -        |
| <i>Cylindrophis ruffus</i>          | AB179619  | AB179619  | AB179619  | AB179619  | AF471133 |
| <i>Cantoria violacea</i>            | EF395897  | -         | EF395873  | EF395848  | EF395922 |
| <i>Cerberus rynchops</i>            | EF395901  | U49327    | AF499289  | EF395852  | EF395926 |
| <i>Loxocemus bicolor</i>            | AY099993  | -         | AF512737  | AF512737  | AY099969 |
| <i>Broghammerus reticulatus</i>     | U69860    | -         | Z46448    | EF545062  | AF039472 |
| <i>Xenopeltis unicolor</i>          | NC_007402 | NC_007402 | NC_007402 | NC_007402 | DQ465561 |
| <i>Indotyphlops braminus</i>        | NC_010196 | NC_010196 | NC_010196 | NC_010196 | AY099980 |
| <i>Lycodon osmanhilli</i>           | -         | KC347524  | -         | KC347364  | KC347403 |
| <i>Oligodon arnensis</i>            | KC347464  | KC347504  | KC347327  | KC347365  | KC347404 |
| <i>Rhabdophis subminiatus</i>       | JQ598951  | JQ687411  | AF544776  | AF544805  | JQ687436 |
| <i>Thamnophis sirtalis</i>          | L33290    | AY136243  | AF402646  | KX694670  | DQ902094 |
| <i>Thermophis zhaoermii</i>         | GQ166168  | GQ166168  | GQ166168  | GQ166168  | KP777529 |
| <i>Oxyrhabdium leporinum</i>        | MG458755  | -         | -         | -         | MG458765 |
| <i>Homoroselaps lacteus</i>         | AF217833  | FJ404339  | FJ404135  | AY611843  | AY058931 |

**Species**

**RAG1**

|                                    |          |
|------------------------------------|----------|
| <i>Acanthophis praelongus</i>      | EU546887 |
| <i>Aipysurus laevis</i>            | EU546906 |
| <i>Aspidomorphus muelleri</i>      | EU366434 |
| <i>Austrelaps superbus</i>         | EU546901 |
| <i>Brachyuropsis semifasciatus</i> | EU546883 |
| <i>Cacophis squamulosus</i>        | EU366440 |
| <i>Demansia papuensis</i>          | EU546871 |
| <i>Denisonia devisi</i>            | EU546894 |
| <i>Drysdalia coronoides</i>        | EU546898 |
| <i>Echiopsis curta</i>             | EU546895 |
| <i>Elapognathus coronatus</i>      | EU546892 |
| <i>Emydocephalus annulatus</i>     | EU546908 |
| <i>Ephalophis greyae</i>           | -        |
| <i>Furina diadema</i>              | EU546878 |
| <i>Hemiaspis dameli</i>            | EU546896 |
| <i>Hoplocephalus bitorquatus</i>   | EU546902 |

|                          |          |
|--------------------------|----------|
| Hydrelaps_darwiniensis   | EU546907 |
| Hydrophis_cyanocinctus   | FJ587112 |
| Micropechis_ikaheka      | EU366435 |
| Neelaps_calonotus        | EU546884 |
| Notechis_scutatus        | -        |
| Oxyuranus_microlepidotus | EU366439 |
| Paroplocephalus_atriceps | EU546903 |
| Parahydrophis_mertoni    | FJ587099 |
| Parasuta_monachus        | EU546890 |
| Pseudechis_australis     | EU546873 |
| Pseudonaja_textilis      | EU546875 |
| Rhinoplocephalus_bicolor | EU546891 |
| Simoselaps_anomalus      | EU546885 |
| Suta_suta                | EU366436 |
| Toxicocalamus_preussi    | EU546870 |
| Tropidechis_carinatus    | EU546904 |
| Vermicella_intermedia    | EU546880 |
| Aspidelaps_scutatus      | -        |
| Bungarus_bungaroides     | -        |
| Bungarus_caeruleus       | -        |
| Bungarus_candidus        | -        |
| Bungarus_ceylonicus      | -        |
| Bungarus_fasciatus       | EU366438 |
| Bungarus_flaviceps       | -        |
| Bungarus_multicinctus    | -        |
| Bungarus_niger           | -        |
| Bungarus_sindanus        | -        |
| Bungarus_slowinskii      | -        |
| Calliophis_melanurus     | -        |
| Calliophis_bivirgata     | -        |
| Calliophis_bibroni       | -        |
| Calliophis_castoe        | -        |
| Calliophis_intestinalis  | -        |
| Calliophis_nigrescens    | -        |
| Cryptophis_nigrescens    | EU546893 |
| Dendroaspis_angusticeps  | -        |
| Elapsoidea_semiannulata  | -        |
| Hemachatus_haemachatus   | -        |
| Hemibungarus_calligaster | -        |
| Laticauda_colubrina      | EU366433 |
| Micruroides_euryxanthus  | -        |
| Micrurus_surinamensis    | -        |
| Naja_kaouthia            | -        |
| Naja_atra                | -        |

|                           |          |
|---------------------------|----------|
| Naja_annulata             | -        |
| Naja_siamensis            | -        |
| Naja_sumatrana            | -        |
| Naja_naja                 | EU366432 |
| Naja_haje                 | -        |
| Naja_annulifera           | -        |
| Naja_nivea                | -        |
| Naja_ashei                | -        |
| Naja_mossambica           | -        |
| Naja_nigricollis          | -        |
| Naja_katiensis            | -        |
| Naja_pallida              | -        |
| Naja_nubiae               | -        |
| Naja_melanoleuca          | -        |
| Naja_multifasciata        | -        |
| Ophiophagus_hannah        | -        |
| Sinomicrurus_japonicus    | -        |
| Sinomicrurus_kelloggii    | -        |
| Sinomicrurus_mcclellandii | -        |
| Walterinnesia_aegypta     | -        |

**Outgroup**

|                              |          |
|------------------------------|----------|
| Eryx_miliaris                | AY487393 |
| Boa_constrictor              | AY487351 |
| Eunectes_notaeus             | AY988063 |
| Psammophis_lineatus          | -        |
| Compsophis_albiventris       | -        |
| Sistrurus_catenatus          | -        |
| Crotalus_atrox               | -        |
| Crotalus_viridis             | -        |
| Vipera_ursinii               | -        |
| Bitis_arietans               | EU852328 |
| Trimeresurus_trigonocephalus | -        |
| Pareas_carinatus             | -        |
| Achalinus_meiguensis         | -        |
| Acrochordus_granulatus       | HM234060 |
| Acrochordus_javanicus        | HM234061 |
| Anilius_scytale              | AY988072 |
| Cylindrophis_maculatus       | KC347433 |
| Cylindrophis_ruffus          | AY662613 |
| Cantoria_violacea            | -        |
| Cerberus_rynchops            | EU366441 |
| Loxocemus_bicolor            | AY444061 |
| Broghammerus_reticulatus     | EU624119 |
| Xenopeltis_unicolor          | EU402870 |

|                        |          |
|------------------------|----------|
| Indotyphlops_braminus  | AY662612 |
| Lycodon_osmanhilli     | KC347441 |
| Oligodon_arnensis      | KC347442 |
| Rhabdophis_subminiatus | -        |
| Thamnophis_sirtalis    | -        |
| Thermophis_zhaoermii   | -        |
| Oxyrhabdium_leporinum  | -        |
| Homoroselaps_lacteus   | -        |

---

**Anguidae**

| <b>Species</b>         | <b>COI</b>      | <b>Cytb</b>  | <b>ND2</b>   | <b>ND4</b>  | <b>AKAP9</b> |
|------------------------|-----------------|--------------|--------------|-------------|--------------|
| Abronia_graminea       | AB080273        | AB080273     | AB080273     | AB080273    | KY712872     |
| Anguis_fragilis        | EU443256        | EU443256     | EU443256     | EU443256    | KY712869     |
| Barisia_imbricata      | -               | AF056597     | AF085613     | AY605116    | -            |
| Dopasia_gracilis       | <b>MW021342</b> | NC030369     | NC030369     | NC030369    | -            |
| Dopasia_hainanensis    | <b>MW021343</b> | -            | -            | -           | -            |
| Dopasia_harti          | NC022700        | KY712783     | AF085624     | KY712810    | KY712870     |
| Dopasia_sp             | <b>MW021344</b> | -            | -            | -           | -            |
| Elgaria_kingii         | -               | KY712790     | KY712769     | KY712818    | KY712879     |
| Gerrhonotus_parvus     | -               | KY712787     | KY712768     | KY712814    | KY712875     |
| Hyalosaurus_koellikeri | -               | -            | AF085621     | -           | -            |
| Mesaspis_monticola     | MH274440        | -            | -            | MG598733    | -            |
| Ophisaurus_attenuatus  | EU747729        | EU747729     | EU747729     | EU747729    | -            |
| Ophisaurus_ventralis   | KU986014        | KY712784     | KY712766     | KY712811    | KY712871     |
| Pseudopus_apodus       | -               | KY712782     | AF085623     | KY712808    | JN614168     |
| <b>Outgroup</b>        |                 |              |              |             |              |
| Anniella_pulchra       | KU985941        | AF195090     | AF085606     | AY620747    | JN614136     |
| Celestus_enneagrammus  | -               | -            | AF085607     | MG598720    | JN614144     |
| Diploglossus_pleei     | -               | -            | AF085609     | -           | -            |
| Ophiodes_striatus      | -               | -            | AF085610     | -           | -            |
| <b>Species</b>         | <b>ATPSb</b>    | <b>BACH1</b> | <b>EXPH5</b> | <b>NKTR</b> | <b>SELT</b>  |
| Abronia_graminea       | KY712923        | KY712981     | KY713030     | KY713062    | KY713114     |
| Anguis_fragilis        | KY712920        | KY712978     | KY713027     | KY713059    | -            |
| Barisia_imbricata      | -               | -            | -            | -           | -            |
| Dopasia_gracilis       | -               | -            | -            | -           | -            |
| Dopasia_hainanensis    | -               | -            | -            | -           | -            |
| Dopasia_harti          | KY712921        | KY712979     | KY713028     | KY713060    | KY713112     |
| Dopasia_sp             | -               | -            | -            | -           | -            |
| Elgaria_kingii         | KY712930        | KY712988     | KY713035     | KY713069    | KY713122     |
| Gerrhonotus_parvus     | KY712926        | KY712984     | KY713032     | KY713065    | KY713117     |
| Hyalosaurus_koellikeri | -               | -            | -            | -           | -            |
| Mesaspis_monticola     | -               | -            | -            | -           | -            |
| Ophisaurus_attenuatus  | -               | -            | -            | -           | -            |
| Ophisaurus_ventralis   | KY712922        | KY712980     | KY713029     | KY713061    | KY713113     |
| Pseudopus_apodus       | KY712919        | JN614195     | KY713026     | KY713058    | KY713111     |
| <b>Outgroup</b>        |                 |              |              |             |              |
| Anniella_pulchra       | -               | -            | -            | JN614006    | -            |
| Celestus_enneagrammus  | -               | JN614186     | -            | JN614010    | -            |
| Diploglossus_pleei     | -               | -            | -            | -           | -            |
| Ophiodes_striatus      | -               | -            | -            | -           | -            |
| <b>Species</b>         | <b>UBN1</b>     |              |              |             |              |
| Abronia_graminea       | KY713180        |              |              |             |              |

|                        |          |
|------------------------|----------|
| Anguis_fragilis        | KY713177 |
| Barisia_imbricata      | -        |
| Dopasia_gracilis       | -        |
| Dopasia_hainanensis    | -        |
| Dopasia_harti          | KY713178 |
| Dopasia_sp             | -        |
| Elgaria_kingii         | KY713187 |
| Gerrhonotus_parvus     | KY713183 |
| Hyalosaurus_koellikeri | -        |
| Mesaspis_monticola     | -        |
| Ophisaurus_attenuatus  | -        |
| Ophisaurus_ventralis   | KY713179 |
| Pseudopus_apodus       | JN614070 |
| <b>Outgroup</b>        |          |
| Anniella_pulchra       | JN614047 |
| Celestus_enneagrammus  | JN614054 |
| Diploglossus_pleei     | -        |
| Ophiodes_striatus      | -        |

---

**Pareidae**

| <b>Species</b>             | <b>Cytb</b>     | <b>C-mos</b>    | <b>ND4</b> |
|----------------------------|-----------------|-----------------|------------|
| Pareas_atayal              | KJ642116        | KJ642198        | -          |
| Pareas_carinatus           | JF827676        | JF827701        | JF827652   |
| Pareas_chinensis           | <b>MW111480</b> | <b>MW111509</b> | -          |
| Pareas_chinensis           | <b>MW111481</b> | <b>MW111510</b> | -          |
| Pareas_chinensis           | JF827690        | JF827716        | JF827667   |
| Pareas_nuchalis            | -               | -               | U49311     |
| Pareas_formosensis         | KJ642130        | KJ642201        | -          |
| Pareas_monticola           | JF827689        | JF827715        | JF827666   |
| Pareas_monticola           | <b>MW111482</b> | <b>MW111511</b> | -          |
| Pareas_hamptoni            | KJ642153        | KJ642205        | -          |
| Pareas_iwasakii            | KJ642156        | KJ642207        | -          |
| Pareas_komaii              | KJ642182        | KJ642210        | -          |
| Pareas_macularius          | <b>MW111483</b> | <b>MW111512</b> | -          |
| Pareas_margaritophorus     | <b>MW111484</b> | <b>MW111513</b> | -          |
| Pareas_stanleyi            | JN230704        | JN230703        | JN230705   |
| Aplopeltura_boa            | JF827673        | JF827696        | JF827650   |
| Asthenodipsas_tropidonotus | AY425808        | -               | -          |
| Asthenodipsas_vertebralis  | AY425807        | -               | -          |
| Asthenodipsas_malaccanus   | KX660469        | KX660336        | KX660597   |
| Asthenodipsas_laevis       | KX660468        | KX660335        | KX660596   |
| <b>Outgroup</b>            |                 |                 |            |
| Gloydus_blomhoffi          | JF827674        | JF827697        | JF827651   |
| Lycodon_rufozonatum        | JF827672        | JF827695        | JF827649   |
| Eryx_miliaris              | U69824          | AF544683        | AF302942   |
| Boa_constrictor            | AB177354        | AF471115        | AB177354   |
| Psammophis_lineatus        | DQ486428        | FJ404256        | EU526861   |
| Compsophis_albiventris     | AY188011        | AY187972        | FJ404351   |
| Sistrurus_catenatus        | AY223610        | JN090134        | AF156575   |
| Crotalus_atrox             | AY223608        | JN090135        | DQ679856   |
| Achalinus_meiguensis       | FJ424614        | -               | FJ424614   |
| Acrochordus_granulatus     | AB177879        | AF471124        | AB177879   |
| Acrochordus_javanicus      | -               | HM234058        | HM234055   |
| Anilius_scytale            | NC_014343       | AF544722        | NC_014343  |
| Cylindrophis_ruffus        | AB179619        | AF471133        | AB179619   |
| Cantoria_violacea          | EF395897        | EF395922        | -          |
| Cerberus_rynchops          | EF395901        | EF395926        | U49327     |
| Loxocemus_bicolor          | AY099993        | AY099969        | -          |
| Broghammerus_reticulatus   | U69860          | AF039472        | -          |
| Xenopeltis_unicolor        | NC_007402       | DQ465561        | NC_007402  |
| Indotyphlops_braminus      | NC_010196       | AY099980        | NC_010196  |
| Thamnophis_sirtalis        | L33290          | DQ902094        | AY136243   |

|                      |          |          |          |
|----------------------|----------|----------|----------|
| Thermophis_zhaoermii | GQ166168 | KP777529 | GQ166168 |
| Naja_naja            | DQ272477 | AF435020 | DQ897690 |
| Naja_haje            | AY611994 | AY611903 | GQ359585 |

---



**Scincidae**

| <b>Species</b>              | <b>12s</b> | <b>16s</b> | <b>ND2</b>      | <b>ND4</b> | <b>Cytb</b> |
|-----------------------------|------------|------------|-----------------|------------|-------------|
| Ablepharus_pannonicus       | -          | -          | AY607280        | -          | -           |
| Acontias_meleagris          | AY169563   | HQ180038   | AY662553        | AY169637   | FJ972224    |
| Amphiglossus_reticulatus    | AY315490   | AY315539   | -               | -          | AY391172    |
| Anomalopus_swasoni          | AY169576   | AY169613   | -               | AY169651   | -           |
| Asymblepharus_alaicus       | -          | -          | AY607281        | -          | -           |
| Asymblepharus_nyingchiensis | -          | -          | <b>MW111452</b> | -          | -           |
| Asymblepharus_sp            | -          | -          | <b>MW111453</b> | -          | -           |
| Asymblepharus_sikimmensis   | -          | -          | AY662549        | -          | -           |
| Asymblepharus_medogensis    | -          | -          | <b>MW111454</b> | -          | -           |
| Brachymeles_bicolor         | AY818761   | -          | -               | -          | FJ972227    |
| Brachymeles_bonitae         | -          | -          | JN981990        | -          | -           |
| Brachymeles_gracilis        | AY649103   | AY649143   | -               | -          | -           |
| Brachymeles_miriamae        | -          | -          | HQ907436        | -          | -           |
| Brachymeles_talinis         | AY649104   | AY649144   | -               | -          | -           |
| Calyptotis_scutirostrum     | AY169577   | AY308181   | AF373265        | AY169652   | AF373235    |
| Carlia_fusca                | AY308331   | AY308182   | -               | FJ379453   | -           |
| Chalcides_ocellatus         | FJ980091   | AY649147   | AY662557        | -          | FJ972228    |
| Chalcides_sexlineatus       | AF054532   | AF054547   | -               | -          | AF054561    |
| Chalcides_viridanus         | AF232630   | EU278036   | -               | -          | AF054566    |
| Ctenotus_labillardieri      | -          | -          | -               | EU109213   | GQ241602    |
| Dasia_grisea                | AB028773   | AB028784   | -               | JF498460   | -           |
| Dasia_olivacea              | AB028772   | AB028783   | -               | -          | -           |
| Dasia_vittata               | AB028771   | AB028782   | -               | -          | -           |
| Egernia_stokesii            | -          | -          | -               | JF813095   | -           |
| Emoia_atrocostata           | JF497856   | JF497979   | -               | JF498461   | -           |
| Emoia_caeruleocauda         | AY218012   | AY217962   | JF498109        | JF498462   | U20454      |
| Emoia_cyanura               | AY218018   | AY308191   | DQ675263        | JF498464   | U49345      |
| Eugongylus_rufescens        | AY169567   | AY649152   | DQ675253        | AY169642   | AY217807    |
| Eulamprus_kosciuskoi        | DQ915292   | DQ915316   | -               | DQ915340   | -           |
| Eulamprus_quoyii            | AY169585   | AY169622   | -               | AY169660   | -           |
| Eumeces_schneideri          | AY315506   | AY308213   | -               | -          | -           |
| Eurylepis_taeniolata        | -          | -          | -               | -          | HM921206    |
| Eutropis_allapallensis      | JQ767975   | JQ767959   | -               | -          | -           |
| Eutropis_beddomei           | JQ767970   | JQ767965   | -               | -          | -           |
| Eutropis_bibronii           | JQ767979   | JQ767963   | -               | -          | -           |
| Eutropis_carinata           | JQ767968   | JQ767954   | -               | -          | -           |
| Eutropis_clivicola          | JQ767978   | JQ767956   | -               | -          | -           |
| Eutropis_cumingi            | DQ239218   | DQ238896   | -               | -          | DQ239137    |
| Eutropis_dissimilis         | AY159046   | AY159075   | -               | -          | -           |
| Eutropis_indeprensa         | AY159047   | AY159076   | -               | -          | -           |
| Eutropis_longicaudata       | AY070341   | AY070359   | -               | AY169645   | DQ239139    |

|                                     |          |          |          |          |          |
|-------------------------------------|----------|----------|----------|----------|----------|
| <i>Eutropis macrophthalma</i>       | AY159048 | AY159077 | -        | -        | -        |
| <i>Eutropis macularia</i>           | AF153557 | AF153573 | -        | AF228556 | AF153590 |
| <i>Eutropis madaraszii</i>          | AY159051 | AY159080 | -        | -        | -        |
| <i>Eutropis multicarinata</i>       | AY159052 | AY159081 | -        | -        | -        |
| <i>Eutropis multifasciata</i>       | AY159054 | AF153576 | JF498112 | JF498466 | AY151513 |
| <i>Eutropis nagarjunensis</i>       | JQ767972 | JQ767952 | -        | -        | -        |
| <i>Eutropis quadricarinata</i>      | AY159060 | AY159089 | -        | -        | -        |
| <i>Eutropis rudis</i>               | AB028779 | AB028790 | -        | -        | DQ239135 |
| <i>Eutropis rugifera</i>            | JQ767980 | JQ767962 | -        | -        | -        |
| <i>Eutropis trivittata</i>          | JQ767971 | JQ767951 | -        | -        | -        |
| <i>Eutropis tyleri</i>              | AY159045 | AY159074 | -        | -        | -        |
| <i>Feylinia polylepis</i>           | AY649120 | AY649161 | AY662556 | -        | FJ972225 |
| <i>Hemiergis peronii</i>            | HM852467 | HM852495 | -        | AY169665 | -        |
| <i>Heremites auratus</i>            | -        | -        | U71330   | -        | AY151507 |
| <i>Heremites vittatus</i>           | EU477288 | -        | -        | -        | EU443142 |
| <i>Insulasaurus arborens</i>        | JF497863 | JF497986 | JF498113 | JF498467 | -        |
| <i>Insulasaurus victoria</i>        | -        | JF497989 | JF498117 | -        | -        |
| <i>Insulasaurus wrighti</i>         | JF497867 | JF497990 | JF498119 | JF498471 | -        |
| <i>Isopachys anguinoides</i>        | AB028803 | AB028815 | -        | -        | -        |
| <i>Lamprolepis smaragdina</i>       | AB028774 | AY169605 | -        | AY169643 | AY217803 |
| <i>Larutia seribuatensis</i>        | -        | -        | HQ907429 | -        | -        |
| <i>Leptosiaphos vigintiserierum</i> | AY308409 | AY308259 | -        | -        | -        |
| <i>Lerista neander</i>              | EF672796 | EF672867 | -        | EF673008 | -        |
| <i>Lipinia noctua</i>               | JF497868 | JF497992 | JF498120 | JF498473 | -        |
| <i>Lipinia pulchella</i>            | JF497869 | JF497994 | JF498121 | JF498475 | -        |
| <i>Lipinia vittigera</i>            | AB028804 | AB028816 | -        | -        | -        |
| <i>Lygisaurus novaeguineae</i>      | AY218014 | AY217964 | -        | AJ290523 | AY217810 |
| <i>Lygosoma albopunctata</i>        | AY308414 | AY308262 | -        | -        | -        |
| <i>Lygosoma bowringii</i>           | AB028775 | AY308263 | HQ907430 | -        | -        |
| <i>Lygosoma koratense</i>           | AB028805 | AY308269 | -        | -        | -        |
| <i>Lygosoma lineolatum</i>          | AY308422 | AY308271 | -        | -        | -        |
| <i>Lygosoma punctata</i>            | -        | -        | DQ675265 | -        | -        |
| <i>Lygosoma quadrupes</i>           | AB028806 | AB028818 | HQ907432 | -        | -        |
| <i>Mabuya mabouya</i>               | EU477265 | AY070357 | JF498123 | -        | EU443115 |
| <i>Madascincus melanopleura</i>     | AY315481 | AY802764 | -        | -        | AY802770 |
| <i>Mesoscincus schwartzei</i>       | AY649117 | AY649158 | -        | -        | -        |
| <i>Nannoscincus mariei</i>          | -        | EU567924 | EU423132 | EU423130 | EU567832 |
| <i>Oligosoma aeneum</i>             | AF194088 | EU567866 | EF567164 | EU567745 | EU567771 |
| <i>Oligosoma lichenigera</i>        | EU567966 | EU567870 | EU567704 | EU567763 | EU567829 |
| <i>Ophiomorus punctatissimus</i>    | AY649127 | AY649168 | AY607279 | -        | EF581258 |
| <i>Otosaurus cumingi</i>            | JF497873 | JF497998 | JF498126 | JF498477 | -        |
| <i>Papuascincus stanleyanus</i>     | JF497877 | JF498000 | JF498128 | JF498479 | -        |
| <i>Parvoscincus steerei</i>         | JF497904 | JF498032 | JF498160 | JF498510 | -        |
| <i>Parvoscincus tagapayo</i>        | JF497918 | JF498046 | JF498174 | JF498520 | -        |

|                              |                 |                 |                 |           |          |
|------------------------------|-----------------|-----------------|-----------------|-----------|----------|
| Plestiodon_barbouri          | EU202957        | DQ173534        | -               | -         | EU203041 |
| Plestiodon_capito            | -               | -               | -               | -         | -        |
| Plestiodon_chinensis         | JN117724        | -               | -               | -         | -        |
| Plestiodon_egregius          | AB016606        | AB016606        | NC_000888       | NC_000888 | AB016606 |
| Plestiodon_elegans           | JN117723        | AY649153        | -               | -         | EU203036 |
| Plestiodon_fasciatus         | AY308349        | AY308200        | -               | JF498546  | DQ241639 |
| Plestiodon_japonicus         | EU202993        | EU203034        | -               | -         | EU203143 |
| Plestiodon_kishinouyei       | -               | -               | -               | -         | -        |
| Plestiodon_laticeps          | AY218039        | AY308205        | -               | -         | EU116510 |
| Plestiodon_latiscutatus      | AY308355        | AY308206        | -               | -         | EU203035 |
| Plestiodon_marginatus        | EU202955        | EU202996        | -               | -         | EU203038 |
| Plestiodon_quadrilineatus    | JF497945        | JF498073        | -               | JF498547  | -        |
| Plestiodon_skiltonianus      | AY308364        | AY308215        | AY662551        | -         | -        |
| Plestiodon_stimpsonii        | AB543279        | EU202997        | -               | -         | EU203039 |
| Plestiodon_tamdaoensis       | -               | -               | -               | -         | -        |
| Plestiodon_tunganus          | -               | -               | -               | -         | -        |
| Ristella_rurkii              | AY308443        | AY308292        | -               | -         | -        |
| Scelotes_mirus               | AY649130        | AY028893        | -               | AF228558  | AY217828 |
| Scincella_assata             | JF497946        | JF498074        | JF498186        | JF498548  | -        |
| Scincella_cherriei           | AB057377        | AB057392        | -               | JF498550  | GQ450315 |
| Scincella_doriae             | -               | -               | <b>MW111451</b> | -         | -        |
| Scincella_huanrenensis       | -               | -               | KU507306        | -         | -        |
| Scincella_lateralis          | AY169598        | HM852503        | JF498187        | AY169673  | AY217806 |
| Scincella_potanini           | -               | -               | AY607287        | -         | -        |
| Scincella_reevesii           | JF497949        | AY308299        | -               | JF498551  | -        |
| Scincella_rupicola           | -               | -               | AY607284        | -         | -        |
| Scincella_tsinlingensis      | -               | -               | AY607286        | -         | -        |
| Scincella_vandenburghi       | -               | -               | KU646826        | -         | -        |
| Scincus_mitranus             | AY649133        | AY308303        | -               | -         | AF280131 |
| Sphenomorphus_acutus         | JF497950        | JF498079        | JF498188        | JF498552  | -        |
| Sphenomorphus_buenloicus     | -               | HM773218        | -               | -         | -        |
| Sphenomorphus_concinnatus    | JF497951        | JF498080        | JF498190        | JF498554  | -        |
| Sphenomorphus_cranei         | JF497952        | JF498082        | JF498192        | JF498556  | -        |
| Sphenomorphus_cyanoaemus     | JF497954        | JF498084        | JF498193        | JF498557  | -        |
| Sphenomorphus_diwata         | JF497956        | JF498086        | JF498194        | JF498558  | -        |
| Sphenomorphus_fasciatus      | JF497958        | JF498088        | DQ675240        | JF498560  | AF373234 |
| Sphenomorphus_indicus        | AB028808        | AB028820        | JF498198        | JF498562  | -        |
| Sphenomorphus_jobiensis      | DQ915291        | AY308306        | DQ675258        | DQ915339  | AF151648 |
| Sphenomorphus_leptofasciatus | -               | -               | AF373263        | -         | AF373233 |
| Sphenomorphus_maculatus      | AY308461        | AY308310        | JF498199        | JF498563  | -        |
| Sphenomorphus_maculatus      | <b>MW026138</b> | <b>MW024860</b> | <b>MW111450</b> | -         | -        |
| Sphenomorphus_maindroni      | AY308462        | AY308311        | -               | -         | -        |
| Sphenomorphus_melanopogon    | AY308463        | AY308312        | -               | -         | -        |
| Sphenomorphus_muelleri       | AY169599        | AY169636        | -               | AY169674  | -        |

|                                     |           |          |           |          |          |
|-------------------------------------|-----------|----------|-----------|----------|----------|
| <i>Sphenomorphus_multisquamatus</i> | JF497961  | JF498091 | JF498200  | JF498564 | -        |
| <i>Sphenomorphus_praesignis</i>     | AB028810  | AB028822 | -         | -        | -        |
| <i>Sphenomorphus_sabanus</i>        | AY308465  | AY308314 | JF498201  | JF498565 | -        |
| <i>Sphenomorphus_scutatus</i>       | JF497963  | JF498093 | JF498202  | JF498566 | -        |
| <i>Sphenomorphus_simus</i>          | AY218017  | AY217967 | -         | -        | EU116518 |
| <i>Sphenomorphus_solomonis</i>      | DQ915304  | AY308316 | JF498204  | DQ915352 | -        |
| <i>Sphenomorphus_stellatus</i>      | -         | HM773221 | -         | -        | -        |
| <i>Sphenomorphus_variegatus</i>     | JF497966  | JF498096 | JF498206  | JF498569 | -        |
| <i>Tiliqua_scincoides</i>           | AF090187  | -        | DQ675249  | -        | -        |
| <i>Trachylepis_perrotetii</i>       | DQ239223  | AY159114 | JF498207  | AY169646 | DQ239145 |
| <i>Tribolonotus_novaeguineae</i>    | AY308472  | AY308321 | HM229445  | -        | HM229523 |
| <i>Tropidophorus_baconi</i>         | AB222937  | AB222953 | -         | -        | -        |
| <i>Tropidophorus_baviensis</i>      | AB222942  | AB222958 | -         | -        | -        |
| <i>Tropidophorus_beccarii</i>       | AB222935  | AB222951 | -         | -        | -        |
| <i>Tropidophorus_berdmorei</i>      | AB028811  | AB028823 | -         | -        | -        |
| <i>Tropidophorus_brookei</i>        | AB222933  | AB222949 | DQ675192  | -        | -        |
| <i>Tropidophorus_cocincinensis</i>  | AB222943  | AY308323 | -         | -        | -        |
| <i>Tropidophorus_grayi</i>          | AB222941  | AB222957 | -         | -        | -        |
| <i>Tropidophorus_hainanus</i>       | AB222944  | AB222960 | -         | -        | -        |
| <i>Tropidophorus_latiscutatus</i>   | AB222934  | AB222950 | -         | -        | -        |
| <i>Tropidophorus_matsuii</i>        | AB222936  | AB222952 | -         | -        | -        |
| <i>Tropidophorus_microlepis</i>     | AB222947  | AB222963 | -         | -        | -        |
| <i>Tropidophorus_misaminius</i>     | AB222948  | AB222964 | -         | -        | -        |
| <i>Tropidophorus_murphyi</i>        | AB222945  | AB222961 | -         | -        | -        |
| <i>Tropidophorus_partelloi</i>      | AB222946  | AB222962 | -         | -        | -        |
| <i>Tropidophorus_robinsoni</i>      | AB222939  | AB222955 | -         | -        | -        |
| <i>Tropidophorus_sinicus</i>        | AB222938  | AB222954 | -         | -        | -        |
| <i>Tropidophorus_thai</i>           | AB222940  | AB222956 | -         | -        | -        |
| <i>Typhlosaurus_lomiaae</i>         | DQ249020  | HQ180022 | AY662554  | -        | DQ249097 |
| <i>Tytthoscincus_aesculeticola</i>  | JF497970  | JF498100 | JF498208  | JF498570 | -        |
| <i>Tytthoscincus_atrigularis</i>    | JF497972  | JF498102 | JF498210  | JF498572 | -        |
| <i>Tytthoscincus_hallieri</i>       | JF497973  | JF498104 | JF498212  | JF498574 | -        |
| <i>Tytthoscincus_parvus</i>         | JF497974  | JF498106 | JF498214  | JF498576 | -        |
| <b>Outgroup</b>                     |           |          |           |          |          |
| <i>Xantusia_bezyi</i>               | AY140984  | AY140993 | EU130270  | AY584432 | EU116615 |
| <i>Xantusia_vigilis</i>             | DQ249024  | DQ249035 | EU130279  | AY584459 | EU116656 |
| <i>Lepidophyma_flavimaculatum</i>   | NC_008775 | DQ249036 | NC_008775 | AB162908 | EU116546 |
| <i>Broadleysaurus_major</i>         | AJ416921  | AJ416922 | AY167396  | -        | DQ090881 |
| <i>Cordylosaurus_subtessellatus</i> | AY218001  | AY217951 | AY167393  | -        | AY217797 |
| <i>Zonosaurus_ornatus</i>           | AJ416929  | AJ416930 | -         | -        | DQ004409 |
| <i>Smaug_warreni</i>                | HQ167133  | HQ167244 | NC_005962 | AB079613 | DQ249103 |
| <i>Namazonurus_namaquensis</i>      | HQ167104  | HQ167215 | -         | -        | EU116507 |
| <i>Cordylus_tropidosternum</i>      | HQ167125  | HQ167236 | -         | -        | DQ090880 |
| <i>Carphodactylus_laevis</i>        | AF090175  | GU460142 | AY369017  | -        | AF109565 |

|                                    |              |             |            |             |           |
|------------------------------------|--------------|-------------|------------|-------------|-----------|
| <i>Delma borea</i>                 | -            | AY134511    | AY134583   | -           | -         |
| <i>Oedura tryoni</i>               | AF090179     | AY583929    | EF532898   | JQ398487    | AY583956  |
| <i>Coleonyx variegatus</i>         | AB114446     | AY140999    | AB114446   | NC_008774   | EU116505  |
| <i>Gonatodes albogularis</i>       | GU139932     | EF564024    | JX041354   | -           | -         |
| <i>Phyllodactylus nocticolus</i>   | FJ662583     | FJ662583    | JX041409   | FJ662561    | -         |
| <i>Gekko gecko</i>                 | HM370130     | HM370130    | AY282753   | AY282753    | NC_007627 |
| <i>Hemidactylus brookii</i>        | HM595685     | HM040938    | EU268375   | EU268438    | GQ375294  |
| <i>Uroplatus phantasticus</i>      | EU596664     | GU129013    | EF490800   | JN038120    | EF490773  |
| <i>Paroedura androyensis</i>       | GU128974     | GU129000    | EF490774   | EF536218    | EF490748  |
| <i>Dibamus novaeguineae</i>        | -            | -           | FJ195390   | FJ195390    | EU116508  |
| <b>Species</b>                     | <b>C-mos</b> | <b>BDNF</b> | <b>R35</b> | <b>RAG1</b> |           |
| <i>Ablepharus pannonicus</i>       | AF039466     | -           | -          | -           |           |
| <i>Acontias meleagris</i>          | AY662572     | GU457870    | HQ876348   | AY662639    |           |
| <i>Amphiglossus reticulatus</i>    | FJ667670     | FJ667641    | -          | -           |           |
| <i>Anomalopus swansoni</i>         | HQ655196     | HQ655159    | -          | -           |           |
| <i>Asymblepharus alaicus</i>       | -            | -           | -          | -           |           |
| <i>Asymblepharus nyingchiensis</i> | -            | -           | -          | -           |           |
| <i>Asymblepharus sp</i>            | -            | -           | -          | -           |           |
| <i>Asymblepharus sikimmensis</i>   | -            | -           | -          | AY662631    |           |
| <i>Asymblepharus medogensis</i>    | -            | -           | -          | -           |           |
| <i>Brachymeles bicolor</i>         | AY818797     | HQ907281    | HQ907689   | -           |           |
| <i>Brachymeles bonitae</i>         | -            | HQ907250    | HM161057   | HM161152    |           |
| <i>Brachymeles gracilis</i>        | -            | HQ907295    | JN568499   | JN654856    |           |
| <i>Brachymeles miriamae</i>        | -            | HQ907236    | HQ907643   | -           |           |
| <i>Brachymeles talinis</i>         | -            | HQ907266    | HQ907674   | -           |           |
| <i>Calyptotis scutirostrum</i>     | -            | -           | -          | -           |           |
| <i>Carlia fusca</i>                | -            | -           | -          | -           |           |
| <i>Chalcides ocellatus</i>         | AY818798     | HM160584    | HM161058   | AY662638    |           |
| <i>Chalcides sexlineatus</i>       | -            | JQ073128    | -          | JQ073251    |           |
| <i>Chalcides viridanus</i>         | -            | JQ073129    | -          | JQ073252    |           |
| <i>Ctenotus Jabillardieri</i>      | -            | -           | -          | -           |           |
| <i>Dasia grisea</i>                | -            | HQ907226    | HQ907631   | -           |           |
| <i>Dasia olivacea</i>              | -            | -           | -          | -           |           |
| <i>Dasia vittata</i>               | DQ675393     | -           | -          | DQ675338    |           |
| <i>Egernia stokesii</i>            | HQ655203     | HQ655166    | -          | -           |           |
| <i>Emoia atrocostata</i>           | -            | HQ907222    | HQ907627   | -           |           |
| <i>Emoia caeruleocauda</i>         | AY217859     | HM160585    | HM161059   | HM161154    |           |
| <i>Emoia cyanura</i>               | AY217865     | -           | JF498338   | DQ675343    |           |
| <i>Eugongylus rufescens</i>        | AY818779     | JN654799    | JN568485   | JN654859    |           |
| <i>Eulamprus kosciuskoi</i>        | -            | -           | -          | -           |           |
| <i>Eulamprus quoyii</i>            | -            | -           | -          | -           |           |
| <i>Eumeces schneideri</i>          | -            | HM160586    | HM161060   | HM161155    |           |
| <i>Eurylepis taeniolata</i>        | -            | HM160587    | HM161061   | HM161156    |           |
| <i>Eutropis allapallensis</i>      | JQ767942     | -           | -          | -           |           |

|                              |          |          |          |          |
|------------------------------|----------|----------|----------|----------|
| Eutropis_beddomei            | JQ767946 | -        | -        | -        |
| Eutropis_bibronii            | JQ767947 | -        | -        | -        |
| Eutropis_carinata            | JQ767941 | -        | -        | -        |
| Eutropis_clivicola           | JQ767945 | -        | -        | -        |
| Eutropis_cumingi             | DQ238977 | -        | -        | -        |
| Eutropis_dissimilis          | -        | -        | -        | -        |
| Eutropis_indepressa          | -        | -        | -        | -        |
| Eutropis_longicaudata        | EU366457 | -        | -        | -        |
| Eutropis_macrophthalma       | -        | -        | -        | -        |
| Eutropis_macularia           | DQ238976 | -        | -        | -        |
| Eutropis_madaraszi           | -        | -        | -        | -        |
| Eutropis_multicarinata       | DQ675394 | -        | -        | DQ675339 |
| Eutropis_multifasciata       | DQ238978 | -        | JF498340 | AY444055 |
| Eutropis_nagarjunensis       | JQ767949 | -        | -        | -        |
| Eutropis_quadricarinata      | -        | -        | -        | -        |
| Eutropis_rudis               | DQ238975 | -        | -        | -        |
| Eutropis_rugifera            | -        | -        | -        | -        |
| Eutropis_trivittata          | JQ767948 | -        | -        | -        |
| Eutropis_tytleri             | -        | -        | -        | -        |
| Feylinia_polylepis           | AY662571 | GU457871 | JN568493 | AY662637 |
| Hemiergis_peronii            | HQ655206 | HQ655171 | -        | -        |
| Heremites_auratus            | -        | -        | -        | AY662629 |
| Heremites_vittatus           | -        | -        | -        | -        |
| Insulasaurus_arborens        | -        | -        | JF498341 | -        |
| Insulasaurus_victoria        | -        | -        | JF498345 | -        |
| Insulasaurus_wrighti         | -        | -        | JF498347 | -        |
| Isopachys_anguinoides        | -        | -        | -        | -        |
| Lamprolepis_smaragdina       | AY217854 | HQ655172 | HQ907626 | -        |
| Larutia_seribuatensis        | -        | HQ907229 | HQ907636 | -        |
| Leptosiaphos_vigintiserierum | EU164504 | -        | -        | -        |
| Lerista_neander              | HQ655208 | HQ655173 | -        | -        |
| Lipinia_noctua               | AF039465 | HQ655175 | JF498348 | -        |
| Lipinia_pulchella            | -        | HQ907220 | HQ907625 | -        |
| Lipinia_vittigera            | -        | -        | -        | -        |
| Lygisaurus_novaeguineae      | AY217861 | -        | -        | -        |
| Lygosoma_albopunctata        | -        | -        | -        | -        |
| Lygosoma_bowringii           | HQ655212 | HQ655177 | HQ907637 | -        |
| Lygosoma_koratense           | -        | -        | -        | -        |
| Lygosoma_lineolatum          | -        | -        | -        | -        |
| Lygosoma_punctata            | -        | -        | -        | DQ675345 |
| Lygosoma_quadupes            | -        | HQ907232 | HQ907639 | -        |
| Mabuya_mabouya               | -        | -        | JF498350 | -        |
| Madascincus_melanopleura     | AY802768 | HM160578 | HM161052 | HM161147 |
| Mesoscincus_schwartzei       | -        | HM160593 | HM161067 | HM161162 |

|                           |          |          |          |          |
|---------------------------|----------|----------|----------|----------|
| Nannoscincus_mariei       | DQ675372 | -        | -        | EU568021 |
| Oligosoma_aeneum          | DQ675384 | -        | -        | EU568058 |
| Oligosoma_lichenigera     | DQ675385 | -        | -        | EU568108 |
| Ophiomorus_punctatissimus | -        | HM160594 | HM161068 | HM161163 |
| Otosaurus_cumingi         | -        | -        | JF498353 | -        |
| Papuascincus_stanleyanus  | -        | -        | JF498355 | -        |
| Parvoscincus_steerei      | -        | -        | JF498400 | -        |
| Parvoscincus_tagapayo     | -        | -        | JF498402 | -        |
| Plestiodon_barbouri       | -        | HM160605 | HM161079 | HM161174 |
| Plestiodon_capito         | -        | HM160608 | HM161082 | HM161177 |
| Plestiodon_chinensis      | -        | HM160610 | HM161084 | HM161179 |
| Plestiodon_egregius       | -        | HM160618 | HM161092 | HM161187 |
| Plestiodon_elegans        | -        | HM160621 | HM161095 | HM161190 |
| Plestiodon_fasciatus      | AY217869 | HQ876228 | HQ876347 | HQ876444 |
| Plestiodon_japonicus      | -        | HM160629 | HM161103 | HM161198 |
| Plestiodon_kishinouyei    | -        | HM160631 | HM161105 | HM161200 |
| Plestiodon_laticeps       | EU116681 | EU108357 | HM161107 | EU108531 |
| Plestiodon_laticutatus    | -        | HM160635 | HM161109 | HM161204 |
| Plestiodon_marginatus     | -        | HM160640 | HM161114 | HM161209 |
| Plestiodon_quadrilineatus | -        | HQ907223 | HM161125 | HM161221 |
| Plestiodon_skiltonianus   | AF315396 | HM160658 | HM161131 | AY662633 |
| Plestiodon_stimpsonii     | -        | HM160660 | HM161133 | HM161229 |
| Plestiodon_tamdaoensis    | -        | HM160663 | HM161136 | HM161232 |
| Plestiodon_tunganus       | -        | HM160666 | HM161139 | HM161235 |
| Ristella_rurkii           | -        | -        | -        | -        |
| Scelotes_mirus            | AY217879 | JQ073075 | -        | JQ073196 |
| Scincella_assata          | -        | -        | JF498428 | -        |
| Scincella_cherriei        | -        | -        | JF498429 | -        |
| Scincella_doriae          | -        | -        | -        | -        |
| Scincella_huanrenensis    | -        | -        | -        | -        |
| Scincella_lateralis       | AY217857 | HQ655188 | HM161140 | HM161236 |
| Scincella_potanini        | -        | -        | -        | -        |
| Scincella_reevesii        | HQ655222 | HQ655189 | HQ907634 | -        |
| Scincella_rupicola        | -        | -        | -        | -        |
| Scincella_tsinlingensis   | -        | -        | -        | -        |
| Scincella_vandenburghi    | -        | -        | -        | -        |
| Scincus_mitranus          | AY818806 | -        | -        | -        |
| Sphenomorphus_acutus      | -        | -        | JF498431 | -        |
| Sphenomorphus_buenloicus  | -        | -        | -        | -        |
| Sphenomorphus_concinnatus | -        | -        | JF498432 | -        |
| Sphenomorphus_cranei      | -        | -        | JF498434 | -        |
| Sphenomorphus_cyanolaemus | -        | -        | JF498436 | -        |
| Sphenomorphus_diwata      | -        | -        | JF498438 | -        |
| Sphenomorphus_fasciatus   | DQ675380 | -        | JF498440 | DQ675320 |

|                              |          |          |          |          |
|------------------------------|----------|----------|----------|----------|
| Sphenomorphus_indicus        | -        | -        | JF498441 | -        |
| Sphenomorphus_jobiensis      | DQ675395 | HQ655190 | -        | -        |
| Sphenomorphus_leptofasciatus | AF039464 | -        | -        | -        |
| Sphenomorphus_maculatus      | -        | -        | JF498442 | -        |
| Sphenomorphus_maculatus      | -        | -        | -        | -        |
| Sphenomorphus_maindroni      | -        | -        | -        | -        |
| Sphenomorphus_melanopogon    | -        | -        | -        | -        |
| Sphenomorphus_muelleri       | -        | -        | -        | -        |
| Sphenomorphus_multisquamatus | -        | -        | JF498443 | -        |
| Sphenomorphus_praesignis     | -        | -        | -        | -        |
| Sphenomorphus_sabanus        | -        | -        | JF498444 | -        |
| Sphenomorphus_scutatus       | -        | -        | JF498445 | -        |
| Sphenomorphus_simus          | EU116688 | EU108365 | -        | EU108539 |
| Sphenomorphus_solomonis      | HQ655224 | HQ655191 | JN568487 | JN654864 |
| Sphenomorphus_stellatus      | -        | -        | -        | -        |
| Sphenomorphus_variegatus     | -        | -        | JF498448 | -        |
| Tiliqua_scincoides           | AF039462 | JN654804 | JN568504 | JN654866 |
| Trachylepis_perrotetii       | DQ238986 | HM160591 | HM161065 | HM161160 |
| Tribolonotus_novaeguineae    | HM229567 | -        | -        | -        |
| Tropidophorus_baconi         | -        | -        | -        | -        |
| Tropidophorus_baviensis      | -        | -        | -        | -        |
| Tropidophorus_beccarii       | -        | -        | -        | -        |
| Tropidophorus_berdmorei      | -        | -        | -        | -        |
| Tropidophorus_brookei        | DQ675397 | -        | -        | -        |
| Tropidophorus_cocincinensis  | -        | -        | -        | -        |
| Tropidophorus_grayi          | -        | -        | -        | -        |
| Tropidophorus_hainanus       | -        | -        | -        | -        |
| Tropidophorus_latiscutatus   | -        | -        | -        | -        |
| Tropidophorus_matsuii        | -        | -        | -        | -        |
| Tropidophorus_microlepis     | -        | -        | -        | -        |
| Tropidophorus_misaminius     | -        | -        | -        | -        |
| Tropidophorus_murphyi        | -        | -        | -        | -        |
| Tropidophorus_partelloi      | -        | -        | -        | -        |
| Tropidophorus_robinsoni      | -        | -        | -        | -        |
| Tropidophorus_sinicus        | -        | -        | -        | -        |
| Tropidophorus_thai           | -        | -        | -        | -        |
| Typhlosaurus_lomiaae         | DQ249065 | -        | -        | DQ249129 |
| Tytthoscincus_aesculeticola  | -        | -        | JF498452 | -        |
| Tytthoscincus_atrigularis    | -        | -        | JF498454 | -        |
| Tytthoscincus_hallieri       | -        | -        | JF498455 | -        |
| Tytthoscincus_parvus         | -        | -        | JF498456 | -        |
| <b>Outgroup</b>              |          |          |          |          |
| Xantusia_bezyi               | EU116786 | EU108462 | -        | EU108636 |
| Xantusia_vigilis             | EU116835 | EU108491 | HQ876351 | AY662642 |



|                              |          |          |          |          |
|------------------------------|----------|----------|----------|----------|
| Lepidophyma_flavimaculatum   | EU116715 | GU457873 | HQ876350 | GU457995 |
| Broadleysaurus_major         | DQ100149 | HM160588 | HM161062 | HM161157 |
| Cordylosaurus_subtessellatus | AY217849 | HQ876225 | HQ876344 | HQ876441 |
| Zonosaurus_ornatus           | DQ100120 | JN654807 | JN568497 | JN614040 |
| Smaug_warreni                | DQ249072 | -        | -        | -        |
| Namazonurus_namaquensis      | AY217848 | AY987981 | -        | EU108528 |
| Cordylus_tropidosternum      | DQ100148 | -        | -        | -        |
| Carphodactylus_laevis        | EF534905 | -        | -        | EF534781 |
| Delma_borea                  | AY134547 | GU457867 | HQ876381 | GU457990 |
| Oedura_tryoni                | AF090848 | -        | -        | JQ173758 |
| Coleonyx_variegatus          | EF534901 | EU108352 | HQ876371 | HQ876448 |
| Gonatodes_albogularis        | EF564078 | GU457866 | HQ876380 | EF534797 |
| Phyllodactylus_nocticolus    | FJ662518 | FJ662489 | -        | HQ426311 |
| Gekko_gecko                  | EU366455 | EU402614 | HQ876378 | AY662625 |
| Hemidactylus_brookii         | AY863049 | HM180358 | -        | GQ375314 |
| Uroplatus_phantasticus       | HQ426592 | EU596897 | -        | EF490747 |
| Paroedura_androyensis        | HQ256721 | -        | -        | EF490721 |
| Dibamus_novaeguineae         | EF450999 | EU108355 | DQ119613 | GU457986 |

---

**Gekkonidae**

| <b>Species</b>                        | <b>ND2</b>      | <b>RAG1</b>     | <b>PDC</b>      |
|---------------------------------------|-----------------|-----------------|-----------------|
| <i>Alsophylax pipiens</i>             | KC151973        | KC152020        | KC151995        |
| <i>Altiphylax medogensis</i>          | <b>MW111448</b> | <b>MW111362</b> | <b>MW111427</b> |
| <i>Altiphylax medogensis</i>          | <b>MW111449</b> | <b>MW111363</b> | <b>MW111428</b> |
| <i>Altiphylax stolickzai</i>          | KJ794404        | KJ794381        | KJ794394        |
| <i>Altiphylax levitoni</i>            | KC151974        | KC152022        | KC151997        |
| <i>Calodactylodes illingworthorum</i> | JX041318        | JQ945288        | JQ945356        |
| <i>Chondrodactylus fitsimensis</i>    | JN393945        | EU293645        | EU293712        |
| <i>Crossobamon orientalis</i>         | KC151975        | KC152023        | KC151998        |
| <i>Cyrtodactylus adleri</i>           | -               | -               | KM255168        |
| <i>Cyrtodactylus angularis</i>        | JX440523        | JQ945301        | JX440632        |
| <i>Cyrtodactylus annandalei</i>       | JX440524        | JX440683        | JX440633        |
| <i>Cyrtodactylus ayeyarwadyensis</i>  | JX440526        | JX440685        | JX440634        |
| <i>Cyrtodactylus battalensis</i>      | KC151983        | KC152035        | KC152007        |
| <i>Cyrtodactylus bintangtinggi</i>    | JX519494        | -               | -               |
| <i>Cyrtodactylus brevidactylus</i>    | JX440527        | JX440687        | JX440636        |
| <i>Cyrtodactylus cayuensis</i>        | <b>MW111436</b> | <b>MW111364</b> | <b>MW111421</b> |
| <i>Cyrtodactylus cayuensis</i>        | <b>MW111437</b> | <b>MW111365</b> | <b>MW111422</b> |
| <i>Cyrtodactylus collegalis</i>       | -               | KC735087        | KC735092        |
| <i>Cyrtodactylus chanhomeae</i>       | JX440529        | JX440688        | JX440637        |
| <i>Cyrtodactylus chrysopylos</i>      | JX440531        | JX440690        | JX440639        |
| <i>Cyrtodactylus deccanensis</i>      | JX440521        | JX440681        | JX440630        |
| <i>Cyrtodactylus elok</i>             | JQ889180        | JX440694        | JX440643        |
| <i>Cyrtodactylus fasciolatus</i>      | KM255184        | KM255120        | KM255143        |
| <i>Cyrtodactylus feae</i>             | JX440536        | JX440696        | JX440645        |
| <i>Cyrtodactylus gansi</i>            | JX440537        | JX440697        | JX440646        |
| <i>Cyrtodactylus gubernatoris</i>     | KM255204        | KM255123        | KM255147        |
| <i>Cyrtodactylus himalayanus</i>      | KM255173        | KM255124        | KM255149        |
| <i>Cyrtodactylus hontreensis</i>      | JX440539        | JX440699        | -               |
| <i>Cyrtodactylus interdigitalis</i>   | JQ889181        | JX440700        | JX440648        |
| <i>Cyrtodactylus intermedius</i>      | JQ889182        | JX440701        | JX440649        |
| <i>Cyrtodactylus jarujini</i>         | JX440541        | JQ945303        | JX440651        |
| <i>Cyrtodactylus jellesmae</i>        | JX440542        | JX440702        | JX440652        |
| <i>Cyrtodactylus khasiensis</i>       | KM255188        | KM255127        | KM255152        |
| <i>Cyrtodactylus lawderanus</i>       | KM255189        | KM255128        | KM255153        |
| <i>Cyrtodactylus loriae</i>           | EU268350        | EU268289        | EU268319        |
| <i>Cyrtodactylus novaeguineae</i>     | JX440547        | HQ426274        | HQ426185        |
| <i>Cyrtodactylus paradoxus</i>        | JX440549        | JX440709        | JX440659        |
| <i>Cyrtodactylus peguensis</i>        | GU550727        | -               | -               |
| <i>Cyrtodactylus philippinus</i>      | JX440550        | JQ945304        | JX440660        |
| <i>Cyrtodactylus pulchellus</i>       | JX440552        | JX440711        | JX440662        |
| <i>Cyrtodactylus quadrivirgatus</i>   | JX440553        | JX440712        | JX440663        |

|                                       |                 |                 |                 |
|---------------------------------------|-----------------|-----------------|-----------------|
| <i>Cyrtodactylus_rubidus</i>          | KM255203        | -               | -               |
| <i>Cyrtodactylus_russelli</i>         | JX440555        | -               | -               |
| <i>Cyrtodactylus_sadlieri</i>         | JQ820309        | -               | -               |
| <i>Cyrtodactylus_semenanjungensis</i> | JQ889177        | JX440716        | JX440666        |
| <i>Cyrtodactylus_sermowaiensis</i>    | JX440558        | JX440718        | JX440668        |
| <i>Cyrtodactylus_slowinskii</i>       | JX440559        | JX440719        | -               |
| <i>Cyrtodactylus_sp_Timor</i>         | JX440560        | JX440720        | JX440669        |
| <i>Cyrtodactylus_tibetanus</i>        | <b>MW111438</b> | <b>MW111366</b> | <b>MW111423</b> |
| <i>Cyrtodactylus_tibetanus</i>        | <b>MW111439</b> | -               | <b>MW111424</b> |
| <i>Cyrtodactylus_tigroides</i>        | JX440562        | JX440723        | JX440671        |
| <i>Cyrtodactylus_tiomanensis</i>      | JX440563        | JX440724        | JX440672        |
| <i>Cyrtodactylus_triedra</i>          | JX440522        | JX440682        | JX440631        |
| <i>Cyrtodactylus_zhaoermii</i>        | <b>MW111440</b> | <b>MW111367</b> | <b>MW111425</b> |
| <i>Cyrtodactylus_zhaoermii</i>        | <b>MW111441</b> | <b>MW111368</b> | <b>MW111426</b> |
| <i>Cyrtodactylus_sp_CHNG</i>          | KM255179        | -               | -               |
| <i>Cyrtodactylus_septentrionalis</i>  | -               | KM255133        | KM255158        |
| <i>Cyrtodactylus_chamba</i>           | KM255191        | KM255134        | KM255159        |
| <i>Cyrtodactylus_sp._Glow</i>         | KM255193        | -               | -               |
| <i>Cyrtodactylus_guwahatiensis</i>    | KM255194        | KM255135        | KM255160        |
| <i>Cyrtodactylus_jaintiaensis</i>     | KM255195        | -               | -               |
| <i>Cyrtodactylus_sp._KHELLONG</i>     | KM255196        | -               | -               |
| <i>Cyrtodactylus_kazirangaensis</i>   | KM255170        | KM255136        | KM255161        |
| <i>Cyrtodactylus_sp._Mizoram</i>      | KM255197        | -               | -               |
| <i>Cyrtodactylus_nagalandensis</i>    | KM255199        | KM255137        | KM255162        |
| <i>Cyrtodactylus_montanus</i>         | KM255200        | KM255138        | KM255163        |
| <i>Cyrtodactylus_sp._Sikkim</i>       | KM255181        | KM255139        | KM255165        |
| <i>Cyrtodactylus_tripuraensis</i>     | KM255182        | KM255141        | KM255166        |
| <i>Cyrtodactylus_oldhami</i>          | JX440548        | JX440707        | JX440657        |
| <i>Cyrtopodion'_aravallense</i>       | KJ794406        | KJ794372        | KJ794385        |
| <i>Cyrtopodion_mansarulus</i>         | KJ794414        | KJ794383        | KJ794396        |
| <i>Cyrtopodion_scabrum</i>            | JX041345        | HQ426275        | HQ426186        |
| <i>Dixonius_vietnamensis</i>          | EU054297        | EU054281        | EU054265        |
| <i>Eublepharis_macularius</i>         | JX041350        | EF534776        | EF534816        |
| <i>Gecko_smithi</i>                   | JN019056        | JN019121        | JN019090        |
| <i>Gehyra_mutilata</i>                | JN019081        | JN019145        | JN019113        |
| <i>Gekko_gecko</i>                    | AF114249        | EU054272        | EU054256        |
| <i>Gekko_monarchus</i>                | JN019078        | JN019142        | JN019110        |
| <i>Gekko_vittatus</i>                 | JN019072        | JN019137        | JN019105        |
| <i>Hemidactylus_anamallensis</i>      | -               | HM622353        | HM622368        |
| <i>Hemidactylus_angulatus</i>         | HM559620        | HM559686        | HM559653        |
| <i>Hemidactylus_aquilonius</i>        | EU268373        | EU268312        | EU268342        |
| <i>Hemidactylus_brasilianus</i>       | EU268351        | EU268290        | EU268320        |
| <i>Hemidactylus_brookii</i>           | GQ458051        | GQ375313        | GQ375307        |
| <i>Hemidactylus_craspedotus</i>       | HM559618        | HM559684        | HM559651        |

|                                    |                 |                 |                 |
|------------------------------------|-----------------|-----------------|-----------------|
| Hemidactylus_depressus             | HM559625        | HM559691        | HM559658        |
| Hemidactylus_fasciatus             | EU268371        | EU268310        | EU268340        |
| Hemidactylus_frenatus              | GQ458049        | GQ375308        | GQ375301        |
| Hemidactylus_garnotii              | EU268363        | EU268302        | EU268332        |
| Hemidactylus_karenorum             | EU268362        | EU268301        | EU268331        |
| Hemidactylus_leschenaulti          | HM559636        | HM559702        | HM559669        |
| Hemidactylus_persicus              | EU268377        | EU268316        | EU268346        |
| Hemidactylus_platyurus             | HM559619        | HM559685        | HM559652        |
| Hemidactylus_platyurus             | -               | <b>MW111369</b> | <b>MW111429</b> |
| Hemiphyllodactylus_aurantiacus     | JN393933        | JN393977        | JN394011        |
| Hemiphyllodactylus_zayuensis       | <b>MW111434</b> | -               | -               |
| Hemiphyllodactylus_zayuensis       | <b>MW111435</b> | -               | -               |
| Hemiphyllodactylus_yunnanensis     | JN393949        | -               | -               |
| Altiphylax_levitoni                | KC151974        | KC152022        | KC151997        |
| Hemidactylus_aaronbaueri           | -               | HM622352        | HM622367        |
| Hemidactylus_bowringii             | -               | HM622354        | HM622369        |
| Hemidactylus_flaviviridis          | -               | EU268294        | EU268324        |
| Hemidactylus_giganteus_2           | -               | HM622357        | HM622372        |
| Hemidactylus_gracilis              | -               | HM622359        | HM622374        |
| Hemidactylus_greeffii              | -               | EU268308        | EU268338        |
| Hemidactylus_haitianus             | -               | EU268311        | EU268341        |
| Hemidactylus_imbricatus            | -               | EU268292        | EU268322        |
| Hemidactylus_mabouia               | -               | EU268300        | EU268330        |
| Hemidactylus_maculatus             | -               | HM622361        | HM622375        |
| Hemidactylus_palaichthus           | -               | EU268307        | EU268337        |
| Hemidactylus_prashadi              | -               | HM622364        | HM622378        |
| Hemidactylus_robustus              | -               | EU268315        | EU268345        |
| Hemidactylus_triedrus              | -               | HM622365        | HM622379        |
| Hemiphyllodactylus_banaensis       | KF219783        | -               | -               |
| Hemiphyllodactylus_bintik          | KJ663757        | -               | -               |
| Hemiphyllodactylus_changningensis  | KP732437        | -               | -               |
| Hemiphyllodactylus_chiangmaiensis  | KF219781        | -               | -               |
| Hemiphyllodactylus_dushanensis     | FJ971016        | -               | -               |
| Hemiphyllodactylus_ganoklonis      | JN393950        | -               | -               |
| Hemiphyllodactylus_harterti        | KF219760        | -               | -               |
| Hemiphyllodactylus_insularis       | KF219762        | -               | -               |
| Hemiphyllodactylus_jinpingensis    | FJ971038        | -               | -               |
| Hemiphyllodactylus_larutensis      | KJ663758        | -               | -               |
| Hemiphyllodactylus_longlingensis   | FJ971045        | -               | -               |
| Hemiphyllodactylus_tehtarik        | KF219784        | -               | -               |
| Hemiphyllodactylus_titiwangsaensis | KF219785        | -               | -               |
| Hemiphyllodactylus_typus           | KF219797        | -               | -               |
| Homopholis_walbergii               | EU054244        | EU054220        | EU054196        |
| Lepidodactylus_lugubris            | JN393944        | JX515629        | JX515642        |

|                                   |          |          |          |
|-----------------------------------|----------|----------|----------|
| <i>Lepidodactylus_orientalis</i>  | JN019080 | JN019144 | JN019112 |
| <i>Lialis_burtonis</i>            | -        | GU459540 | GU459742 |
| <i>Lialis_jicari</i>              | AY369025 | -        | -        |
| <i>Luperosaurus_cumingii</i>      | JX515623 | JX515637 | JX515650 |
| <i>Mediodactylus_russowii</i>     | JX440517 | JX440678 | JX440627 |
| <i>Microgecko_persicus</i>        | KJ794409 | KJ794375 | KJ794388 |
| <i>Nactus_vankampeni</i>          | EU054295 | EU054279 | EU054263 |
| <i>Oedura_marmorata</i>           | GU459951 | EF534779 | EF534819 |
| <i>Phelsuma_inexpectata</i>       | JN393939 | JN393983 | JN394016 |
| <i>Phelsuma_rosagularis</i>       | EU423292 | HQ426306 | HQ426217 |
| <b>Outgroup</b>                   |          |          |          |
| <i>Phyllodactylus_xanti</i>       | JN393940 | EF534807 | EF534849 |
| <i>Ptyodactylus_guttatus</i>      | JX041426 | EU293636 | EU293703 |
| <i>Pygopus_nigriceps</i>          | JX440518 | EF534783 | EF534823 |
| <i>Sphaerodactylus_roosevelti</i> | JN393943 | EF534785 | EF534825 |
| <i>Sphaerodactylus_torrei</i>     | JX440519 | EF534788 | EF534829 |
| <i>Tenuidactylus_caspicus</i>     | KC151988 | KC152039 | KC152012 |
| <i>Tropicolotes_nubicus</i>       | KC151991 | KC152042 | KC152015 |
| <i>Woodworthia_maculata</i>       | GU459852 | GU459449 | GU459651 |

---

## Viperidae

| Species                  | 12s      | 16s      | Cytb     | ND4      |
|--------------------------|----------|----------|----------|----------|
| Agkistrodon_contortrix   | AF259224 | AF259117 | EU483263 | AF156576 |
| Agkistrodon_piscivorus   | KX694610 | KX694680 | DQ523161 | DQ523161 |
| Atheris_ceratophora      | DQ305410 | DQ305433 | DQ305456 | DQ305474 |
| Atheris_chlorechis       | KX694550 | KX694618 | KX694841 | EU624211 |
| Atheris_nitschei         | AY223650 | AY223663 | AF471070 | AY223618 |
| Atheris_squamigera       | AF544762 | EU624279 | EU624303 | EU624212 |
| Atropoides_picadoi       | AF057208 | AF057255 | AY223583 | U41872   |
| Azemiops_feae            | KX694579 | KX694684 | KX694840 | AY352808 |
| Bitis_arietans           | KX694571 | KX694619 | KX694845 | EU852304 |
| Bitis_gabonica           | KX694551 | KX694671 | KX694846 | EU624217 |
| Bitis_nasicornis         | DQ305411 | DQ305434 | DQ305457 | DQ305475 |
| Bitis_rubida             | EU624251 | EU624286 | EU624306 | EU624219 |
| Bitis_worthingtoni       | EU624252 | AJ275745 | AJ275692 | EU624220 |
| Bitis_xeropaga           | EU624253 | EU624287 | EU624307 | EU624221 |
| Bothriechis_lateralis    | AF057211 | AF057258 | AY223588 | U41873   |
| Bothriechis_nigroviridis | AF057212 | AF057259 | AY223589 | AY223635 |
| Bothriechis_schlegelii   | AF057213 | AF057260 | AY223590 | AF292611 |
| Bothrops_ammodytoides    | AY223658 | AY223671 | AY223595 | AY223639 |
| Bothrops_asper           | AF057218 | AF057265 | AY223599 | U41876   |
| Bothrops_brazili         | EU867252 | EU867264 | AF292597 | AF292635 |
| Bothrops_chloromelas     | DQ305430 | DQ305453 | DQ305471 | DQ305488 |
| Bothrops_erythromelas    | AF057219 | AF057266 | AY223600 | U41877   |
| Bothrops_jararaca        | KX694583 | EU867266 | KX694833 | AY122860 |
| Bothrops_pictus          | -        | -        | AF292583 | AF292621 |
| Calloselasma_rhodostoma  | KX694585 | KX694626 | AF292569 | AY352813 |
| Causus_lichtensteini     | KX694560 | KX694628 | KX694848 | -        |
| Causus_resimus           | AY223649 | AY223662 | AY223555 | AY223616 |
| Causus_rhombeatus        | DQ305409 | DQ305432 | DQ305455 | U41866   |
| Cerastes_cerastes        | KX694540 | KX694629 | AF471028 | EU624222 |
| Cerastes_gasperettii     | JN870181 | AJ275756 | AJ275704 | -        |
| Cerastes_vipera          | -        | AJ275757 | AJ275705 | -        |
| Mixcoatlus_barbouri      | HM363639 | HM363640 | HM363641 | HM363642 |
| Cerrophidion_tzotzilorum | JN870182 | JN870193 | DQ061203 | DQ061228 |
| Crotalus_adamanteus      | KX694608 | KX694635 | AF259185 | U41880   |
| Crotalus_basiliscus      | AF259244 | AF259136 | AY704845 | AY704894 |
| Crotalus_cerastes        | AF259235 | AF259128 | U69773   | JN620962 |
| Crotalus_enyo            | AF259245 | AF259137 | -        | -        |
| Crotalus_pricei          | AF259237 | AF259130 | -        | JN022878 |
| Crotalus_ruber           | AF259261 | AF259153 | -        | DQ679838 |
| Crotalus_willardi        | KX694609 | KX694682 | KX694839 | JN870209 |
| Daboia_mauritanica       | EU624261 | EU624295 | EU624313 | EU624229 |

|                        |                 |                 |                 |          |
|------------------------|-----------------|-----------------|-----------------|----------|
| Daboia_palaestinae     | JN870183        | AJ275775        | AJ275722        | -        |
| Daboia_siamensis       | EU913478        | NC011391        | NC_011391       | EU913478 |
| Deinagkistrodon_acutus | KX694593        | KX694683        | KX694847        | AY352811 |
| Echis_borkini          | GQ359644        | GQ359730        | GQ359486        | GQ359563 |
| Echis_carinatus        | EU852313        | EU852319        | EU852295        | GQ359524 |
| Echis_coloratus        | EU852315        | EU852321        | EU852297        | EU624224 |
| Echis_jogeri           | GQ359641        | GQ359732        | GQ359476        | GQ359560 |
| Echis_leucogaster      | GQ359622        | GQ359705        | GQ359456        | GQ359541 |
| Echis_omanensis        | GQ359631        | GQ359715        | GQ359466        | GQ359550 |
| Echis_pyramidum        | EU852314        | EU852320        | EU852296        | EU624226 |
| Eristicophis_macmahoni | EU624259        | EU624293        | AJ275711        | EU624227 |
| Garthius_chaseni       | AY352791        | AY352729        | AY352760        | AY352825 |
| Gloydus_blomhoffi      | AY352780        | AY352719        | AY352751        | AY352814 |
| Gloydus_brevicaudus    | AY352781        | AY352720        | AY352752        | AY352815 |
| Gloydus_halys          | KY040526        | KY040558        | KX063802        | KX063775 |
| Gloydus_intermedius    | KY040524        | KY040556        | KY040617        | KY040638 |
| Gloydus_stejnegeri     | KY040536        | KY040568        | KX063817        | KX063790 |
| Gloydus_cognatus       | KY040529        | KY040561        | KY040619        | KY040640 |
| Gloydus_liupanensis    | EF012814        | -               | JQ687491        | JQ687472 |
| Gloydus_qinglinensis   | KY040534        | KY040566        | KY040623        | KY040644 |
| Gloydus_changdaoensis  | KY040521        | KY040553        | KX063821        | KX063794 |
| Gloydus_shedaoensis    | AF057194        | AF057241        | AY223566        | AY223623 |
| Gloydus_huangi         | MK227409        | MK227412        | MK227415        | MK227418 |
| Gloydus_strauchi       | KY040543        | KY040575        | KY040629        | KY040650 |
| Gloydus_monticola      | KY040550        | KY040582        | KY040636        | JX661243 |
| Gloydus_rubromaculatus | KY040548        | KY040580        | KY040634        | KY040655 |
| Gloydus_angusticep     | KY040540        | KY040572        | KY040626        | KY040647 |
| Gloydus_tsushimaensis  | JN870186        | JN870196        | JN870203        | JN870211 |
| Gloydus_ussuriensis    | AF057193        | AF057240        | AY223565        | AY223622 |
| Hypnale_hypnale        | AY352778        | AY352717        | AY352750        | AY352812 |
| Hypnale_nepa           | KC347325        | KC347362        | KC347485        | KC347491 |
| Hypnale_zara           | KC347326        | KC347363        | KC347463        | KC347513 |
| Lachesis_acrochorda    | JN870187        | JN870197        | JN870204        | JN870212 |
| Macrovipera_lebetina   | KX694561        | KX694652        | AJ275713        | DQ897729 |
| Macrovipera_schweizeri | EU624262        | AJ275768        | AJ275715        | -        |
| Mixcoatlus_browni      | HM363650        | HM363651        | HM363652        | HM363653 |
| Mixcoatlus_melanurus   | AF057210        | AF057257        | AY223587        | AY223634 |
| Montivipera_albizona   | EU624265        | AJ275780        | AJ275727        | DQ897731 |
| Montivipera_wagneri    | JN870188        | AJ275778        | AJ275725        | JN870213 |
| Montivipera_xanthina   | EU624268        | AJ275777        | AJ275724        | EU624234 |
| Ophryacus_undulatus    | AF057209        | AF057256        | AY223586        | AY223633 |
| Ovophis_monticola      | HQ325260        | HQ325078        | HQ325138        | HQ325199 |
| Ovophis_monticola      | <b>MW020347</b> | <b>MW020093</b> | <b>MW111485</b> | -        |
| Ovophis_monticola      | HQ325306        | HQ325119        | HQ325179        | HQ325241 |

|                               |                 |                 |                 |                 |
|-------------------------------|-----------------|-----------------|-----------------|-----------------|
| Ovophis_makazayazaya          | HQ325266        | HQ325084        | HQ325143        | HQ325202        |
| Ovophis_makazayazaya          | DQ305417        | DQ305440        | DQ305463        | DQ305481        |
| Ovophis_convictus             | HQ325264        | HQ325082        | HQ325129        | HQ325190        |
| Ovophis_okinavensis           | AF057199        | AF057246        | AY223573        | U41895          |
| Ovophis_tonkinensis           | HQ325308        | HQ325121        | HQ325181        | HQ325243        |
| Ovophis_tonkinensis           | HQ325255        | HQ325073        | HQ325133        | HQ325194        |
| Ovophis_tonkinensis           | HQ325274        | HQ325096        | HQ325151        | HQ325209        |
| Ovophis_zayuensis             | HQ325273        | HQ325089        | HQ325150        | HQ325208        |
| Ovophis_zayuensis             | <b>MW020348</b> | <b>MW020094</b> | <b>MW111486</b> | <b>MW111430</b> |
| Ovophis_zayuensis             | HQ325304        | HQ325118        | HQ325177        | HQ325239        |
| Porthidium_ophryomegas        | AF057205        | AF057252        | AY223580        | U41888          |
| Porthidium_yucatanicum        | JN870189        | JN870198        | DQ061215        | DQ061244        |
| Proatheris_superciliaris      | EU624263        | EU624296        | AJ275685        | EU624230        |
| Protobothrops_cornutus        | AY294276        | AY294267        | AY294272        | AY294262        |
| Protobothrops_dabieshanensis  | NC_022473       | NC_022473       | NC_022473       | NC_022473       |
| Protobothrops_elegans         | AF057201        | AF057248        | AY223575        | U41893          |
| Protobothrops_flavoviridis    | AY352792        | AY352730        | AY223574        | AY352826        |
| Protobothrops_himalayanus     | <b>MW133302</b> | <b>MW020036</b> | <b>MW111487</b> | -               |
| Protobothrops_jerdonii        | AY763180        | AY763199        | HM567474        | EU810020        |
| Protobothrops_jerdonii        | <b>MW133303</b> | <b>MW020037</b> | <b>MW111488</b> | -               |
| Protobothrops_jerdonii        | <b>MW133304</b> | <b>MW020038</b> | KF997884        | -               |
| Protobothrops_jerdonii        | <b>MW020039</b> | MW020039        | <b>MW111489</b> | -               |
| Protobothrops_jerdonii        | <b>MW133305</b> | <b>MW020040</b> | -               | -               |
| Protobothrops_jerdonii        | <b>MW133306</b> | <b>MW020041</b> | <b>MW111490</b> | -               |
| Protobothrops_kaulbacki       | DQ666056        | DQ666055        | DQ666060        | DQ666057        |
| Protobothrops_mangshanensis   | AY352787        | AY352726        | AY352758        | AY352821        |
| Protobothrops_maolanensis     | JN799405        | JN799398        | JN799401        | JN799409        |
| Protobothrops_mucrosquamatus  | AY223653        | AY223666        | AY223577        | AY223629        |
| Protobothrops_tokarensis      | AF057202        | AF057249        | AY223576        | AY223628        |
| Protobothrops_trungkhanhensis | KT220284        | KT220303        | KT220323        | KT220343        |
| Protobothrops_trungkhanhensis | <b>MW133307</b> | <b>MW020042</b> | <b>MW111491</b> | -               |
| Protobothrops_xiangchengensis | AY763188        | AY763207        | DQ666061        | DQ666058        |
| Protobothrops_sieversorum     | DQ305414        | DQ305437        | AY352753        | DQ305478        |
| Pseudocerastes_fieldi         | EU624264        | AJ275769        | AJ275716        | -               |
| Sistrurus_catenatus           | DQ464268        | AF259119        | AY223610        | HQ257759        |
| Sistrurus_miliarius           | KX694565        | KX694679        | EU483385        | HQ257760        |
| Trimeresurus_albolabris       | AF057195        | AF057242        | AY223567        | U41890          |
| Trimeresurus_andersonii       | AY352801        | AY352740        | -               | AY352835        |
| Trimeresurus_popeiorum        | AY371753        | AY371769        | AY371801        | AY371837        |
| Trimeresurus_borneensis       | AY352783        | AY352722        | AY352754        | AY352817        |
| Trimeresurus_popeiorum        | AY371752        | AY371778        | AY371818        | AY371853        |
| Trimeresurus_cantori          | AY352802        | AY352741        | AF171889        | AY352836        |
| Trimeresurus_erythrurus       | AF517161        | AF517174        | AF171900        | AF517217        |
| Trimeresurus_fasciatus        | GQ428492        | GQ428466        | GQ428475        | GQ428482        |



|                                      |                 |                 |                 |          |
|--------------------------------------|-----------------|-----------------|-----------------|----------|
| <i>Trimeresurus_flavomaculatus</i>   | AY059535        | AY059551        | AF171916        | AY059584 |
| <i>Trimeresurus_popeiorum</i>        | AY059537        | AY059553        | AY371796        | AY059588 |
| <i>Trimeresurus_gracilis</i>         | DQ305415        | DQ305438        | AF171913        | AY352823 |
| <i>Trimeresurus_gramineus</i>        | AY352793        | AY352731        | AY352761        | AY352827 |
| <i>Trimeresurus_gumprechti</i>       | EU443791        | EU443792        | AY321489        | EU443787 |
| <i>Trimeresurus_hageni</i>           | AY059536        | AY059552        | AY059567        | AY059585 |
| <i>Trimeresurus_insularis</i>        | AY059534        | AY352738        | AY059568        | AY352833 |
| <i>Trimeresurus_kanburiensis</i>     | AY289219        | AY352737        | AY289225        | AY289231 |
| <i>Trimeresurus_macrops</i>          | AF517163        | AF517176        | AF517184        | AF517219 |
| <i>Trimeresurus_malabaricus</i>      | AY059548        | AY059564        | AY059569        | AY059587 |
| <i>Trimeresurus_malcolmi</i>         | AY371757        | AY371786        | AY371832        | AY371861 |
| <i>Trimeresurus_mcgregori</i>        | AY371756        | AY371795        | AY371831        | AY371858 |
| <i>Trimeresurus_medoensis</i>        | AY352797        | AY352735        | AY352765        | AY352831 |
| <i>Trimeresurus_medoensis</i>        | <b>MW020335</b> | <b>MW020095</b> | <b>MW111479</b> | -        |
| <i>Trimeresurus_popeiorum</i>        | AY371737        | AY371774        | AY371814        | AY371839 |
| <i>Trimeresurus_popeiorum</i>        | AY059538        | AY059554        | AY059571        | AY059590 |
| <i>Trimeresurus_puniceus</i>         | AF517164        | AF517177        | AF517192        | AF517220 |
| <i>Trimeresurus_purpleomaculatus</i> | AF517162        | AF517175        | AF517188        | AF517218 |
| <i>Trimeresurus_sabahi</i>           | AY371736        | AY371771        | AY371815        | AY371842 |
| <i>Trimeresurus_schultzei</i>        | AY352785        | AY352725        | AY352756        | AY352819 |
| <i>Trimeresurus_septentrionalis</i>  | AY059543        | AY352724        | AY352755        | AY352818 |
| <i>Trimeresurus_sichuanensis</i>     | HQ850445        | HQ850446        | HQ850448        | HQ850450 |
| <i>Trimeresurus_stejnegeri</i>       | AY059539        | AY059555        | AF171896        | AY059593 |
| <i>Trimeresurus_sumatranus</i>       | AY371759        | AY371788        | AY371828        | AY371866 |
| <i>Trimeresurus_tibetanus</i>        | AY352776        | AY352715        | AY352749        | AY352810 |
| <i>Trimeresurus_trigonocephalus</i>  | AY059549        | AY059565        | AF171890        | AY059597 |
| <i>Trimeresurus_truongsonensis</i>   | EU443817        | EU443818        | EU443815        | EU443816 |
| <i>Trimeresurus_venustus</i>         | AY293931        | AY352723        | AF171914        | AY293930 |
| <i>Trimeresurus_vogeli</i>           | AF517170        | AF517183        | AY059581        | AF517225 |
| <i>Trimeresurus_yunnanensis</i>      | EU443813        | EU443814        | EF597523        | EF597527 |
| <i>Tropidolaemus_subannulatus</i>    | AF057198        | AF057245        | AY223571        | AY223625 |
| <i>Tropidolaemus_wagleri</i>         | AF517167        | AF517180        | AF517191        | AF517223 |
| <i>Vipera_ammodytes</i>              | EU624266        | EU624297        | AM944799        | EU624232 |
| <i>Vipera_berus</i>                  | EU543221        | DQ186081        | DQ186032        | DQ897728 |
| <i>Vipera_eriwanensis</i>            | KX694555        | KX694672        | KX694842        | FR727021 |
| <i>Vipera_kaznakovi</i>              | -               | -               | AY321093        | FR727034 |
| <i>Vipera_latastei</i>               | -               | -               | AY321094        | JX649572 |
| <i>Vipera_lotievi</i>                | -               | -               | JN204717        | FR727030 |
| <i>Vipera_renardi</i>                | -               | -               | HQ845740        | FR727033 |
| <i>Vipera_seoanei</i>                | -               | AJ275782        | DQ186030        | FR727035 |
| <i>Vipera_ursinii</i>                | -               | -               | AY311383        | FR726981 |
| <b>Outgroup</b>                      |                 |                 |                 |          |
| <i>Achalinus_meiguensis</i>          | FJ424614        | FJ424614        | FJ424614        | FJ424614 |
| <i>Achalinus_rufescens</i>           | KX694570        | KX694613        | KX694895        | U49319   |

|                                 |           |           |           |           |
|---------------------------------|-----------|-----------|-----------|-----------|
| <i>Acrochordus_granulatus</i>   | AB177879  | NC_007400 | NC_007400 | NC_007400 |
| <i>Acrochordus_javanicus</i>    | KX694587  | KX694614  | KX694897  | HM234055  |
| <i>Ahaetulla_prasina</i>        | KX694556  | KX694615  | -         | -         |
| <i>Ahaetulla_pulverulenta</i>   | KC347304  | -         | KC347454  | KC347512  |
| <i>Anilius_scytale</i>          | FJ755180  | -         | FJ755180  | FJ755180  |
| <i>Antillophis_parvifrons</i>   | KX694557  | KX694616  | KX694883  | FJ416814  |
| <i>Aparallactus_modestus</i>    | FJ404130  | AY611824  | AY612007  | FJ404332  |
| <i>Aplopeltura_boa</i>          | AF544761  | AF544787  | -         | U49312    |
| <i>Aspidelaps_scutatus</i>      | KX694563  | KX694617  | KX694861  | AY058969  |
| <i>Atractaspis_corpulenta</i>   | Z46597    | AY611837  | AY612020  | FJ404335  |
| <i>Atractaspis_micropholis</i>  | AF544740  | AY611823  | AY612006  | FJ404336  |
| <i>Boa_constrictor</i>          | NC_007398 | NC_007398 | AF471036  | NC_007398 |
| <i>Boaedon_fuliginosus</i>      | AY122681  | AY188079  | AF471060  | HQ207151  |
| <i>Brachyorrhos_albus</i>       | KX694569  | KX694674  | KX694849  | -         |
| <i>Brogammerus_reticulatus</i>  | Z46448    | -         | FJ717481  | -         |
| <i>Bungarus_fasciatus</i>       | NC_011393 | NC_011393 | EU579523  | EU579523  |
| <i>Calabaria_reinhardtii</i>    | Z46464    | -         | AY099985  | AF302943  |
| <i>Calamaria_pavimentata</i>    | KX694584  | KX694624  | KX694890  | -         |
| <i>Calamaria_yunnanensis</i>    | KX694572  | KX694625  | KX694891  | -         |
| <i>Cantoria_violacea</i>        | KX694595  | KX694627  | KX694852  | -         |
| <i>Cerberus_rynchops</i>        | KX694596  | KX694630  | KX694850  | U49327    |
| <i>Chrysopelea_ornata</i>       | KX694558  | KX694631  | KX694862  | KC347496  |
| <i>Coluber_constrictor</i>      | KX694604  | KX694632  | EU180486  | AF138746  |
| <i>Compsophis_infralineatus</i> | KX694601  | KX694633  | EF203990  | FJ404359  |
| <i>Coronella_austriaca</i>      | KX694589  | KX694634  | KX694868  | AY487065  |
| <i>Cubophis_cantherigerus</i>   | AF158405  | AF158475  | AF544669  | FJ416818  |
| <i>Cylindrophis_ruffus</i>      | NC_007401 | -         | NC_007401 | NC_007401 |
| <i>Diadophis_punctatus</i>      | AY577015  | KX694636  | EU193843  | EU194025  |
| <i>Dipsas_catesbyi</i>          | Z46459    | KX694637  | KX694856  | EF078585  |
| <i>Dromicodryas_bernieri</i>    | KX694586  | KX694638  | DQ979987  | FJ404353  |
| <i>Drymarchon_corais</i>        | HM565758  | KX694639  | KX694871  | DQ902314  |
| <i>Duberria_lutrix</i>          | KX694598  | KX694640  | KX694892  | DQ486308  |
| <i>Eirenis_modestus</i>         | AY039143  | KX694641  | KX694864  | AY487072  |
| <i>Erpeton_tentaculatus</i>     | KX694592  | KX694642  | KX694851  | -         |
| <i>Erythrolamprus_miliaris</i>  | KX694588  | KX694643  | KX694884  | -         |
| <i>Eryx_colubrinus</i>          | AF544747  | -         | U69811    | -         |
| <i>Eunectes_notaeus</i>         | AM236347  | -         | AM236347  | AM236347  |
| <i>Gonionotophis_brussauxi</i>  | FJ404156  | KX694644  | AY612043  | FJ404358  |
| <i>Gonionotophis_capensis</i>   | AF544769  | KX694645  | HQ207116  | AF544665  |
| <i>Gonyosoma_oxycephalum</i>    | AY122678  | KX694646  | KX694870  | DQ902309  |
| <i>Grayia_ornata</i>            | AF158434  | AF158503  | KX694888  | AF544663  |
| <i>Heterodon_platirhinus</i>    | AY577019  | KX694647  | KX694857  | AF402659  |
| <i>Homalopsis_buccata</i>       | KX694597  | KX694690  | EF395917  | -         |
| <i>Homoroselaps_lacteus</i>     | KX694590  | KX694686  | KX694889  | AY058976  |

|                                       |          |          |          |           |
|---------------------------------------|----------|----------|----------|-----------|
| <i>Imantodes_cenchoa</i>              | KX694602 | KX694687 | KX694858 | NC_013988 |
| <i>Ithycyphus_miniatus</i>            | KX694576 | KX694648 | KX694863 | -         |
| <i>Lampropeltis_getula</i>            | KX694603 | KX694649 | KX694866 | AF138759  |
| <i>Laticauda_colubrina</i>            | U96799   | EU547138 | EU547040 | AY058977  |
| <i>Leioheterodon_madagascariensis</i> | KX694599 | AY188061 | KX694881 | FJ404371  |
| <i>Leptodeira_annulata</i>            | GQ457806 | GQ457746 | EF078516 | FJ416787  |
| <i>Liophidium_torquatum</i>           | KX694577 | KX694650 | KX694880 | -         |
| <i>Loxocemus_bicolor</i>              | Z46456   | -        | AY099993 | -         |
| <i>Lycophidion_capense</i>            | FJ404178 | AY611893 | AY612075 | FJ404376  |
| <i>Macropisthodon_rudis</i>           | KX694559 | KX694651 | KX694875 | U49326    |
| <i>Malpolon_monspessulanus</i>        | KX694541 | KX694653 | KX694879 | FJ404320  |
| <i>Micrurus_surinamensis</i>          | AF544770 | AF544799 | EF137415 | EF137407  |
| <i>Mimophis_mahafalensis</i>          | KX694543 | -        | KX694877 | DQ486202  |
| <i>Naja_atra</i>                      | KX694544 | KX694689 | KX694859 | EU921898  |
| <i>Natrix_natrix</i>                  | KX694573 | -        | KX694876 | AY873716  |
| <i>Nerodia_sipedon</i>                | KX694606 | KX694654 | KX694873 | -         |
| <i>Ninia_atrata</i>                   | GQ457814 | KX694675 | KX694854 | GQ334659  |
| <i>Ophiophagus_hannah</i>             | KX694600 | KX694688 | KX694860 | EU921899  |
| <i>Pantherophis_guttatus</i>          | AY122814 | KX694685 | AM236349 | AM236349  |
| <i>Pareas_carinatus</i>               | AF544773 | AF544802 | JQ598940 | -         |
| <i>Pareas_hamptoni</i>                | KX694545 | KX694656 | KX694896 | -         |
| <i>Pituophis_deppei</i>               | KX694582 | KX694657 | KX694867 | AF138765  |
| <i>Polemon_acanthias</i>              | FJ404138 | AY611848 | AY612031 | FJ404341  |
| <i>Psammophis_elegans</i>             | KX694546 | KX694659 | -        | EU526862  |
| <i>Psammophis_mossambicus</i>         | KX694547 | KX694660 | KX694878 | DQ486283  |
| <i>Psammophis_subtaeniatus</i>        | -        | KX694661 | DQ486358 | DQ486253  |
| <i>Psammophylax_variabilis</i>        | AF544774 | AY611864 | AY612046 | EU526859  |
| <i>Pseudonaja_modesta</i>             | EU547098 | KX694662 | EU547049 | DQ098490  |
| <i>Pseudoxenodon_bambusicola</i>      | KX694575 | KX694678 | -        | -         |
| <i>Pseudoxenodon_karlschmidti</i>     | KX694578 | KX694676 | KX694893 | -         |
| <i>Psomophis_joberti</i>              | GQ457829 | GQ457768 | KX694887 | -         |
| <i>Ptyas_korros</i>                   | KX694591 | KX694663 | KX694869 | AY487062  |
| <i>Indotyphlops_braminus</i>          | DQ343649 | -        | DQ343649 | NC_010196 |
| <i>Rhachidelus_brazili</i>            | JQ598837 | JQ598897 | KX694885 | -         |
| <i>Rhamphiophis_oxyrhynchus</i>       | KX694548 | KX694664 | -        | -         |
| <i>Sibynomorphus_mikanii</i>          | GQ457832 | GQ457771 | KX694855 | -         |
| <i>Sibynophis_collaris</i>            | KX694581 | KX694665 | KC000121 | JN211315  |
| <i>Sinomicrurus_maclellandi</i>       | KX694549 | KX694666 | KX694853 | EF137410  |
| <i>Sinonatrix_percarinata</i>         | KX694542 | KX694667 | KX694872 | JQ687414  |
| <i>Spalerosophis_diadema</i>          | KX694605 | KX694668 | KX694865 | AY487059  |
| <i>Stoliczka_borneensis</i>           | AF544779 | AF544808 | -        | -         |
| <i>Storeria_dekayi</i>                | KX694607 | KX694669 | KX694874 | EF417365  |
| <i>Taeniophallus_nicagus</i>          | KX694562 | KX694677 | KX694886 | -         |
| <i>Thamnophis_sirtalis</i>            | KX694574 | KX694670 | AF420193 | AF420196  |

|                             |           |           |           |           |
|-----------------------------|-----------|-----------|-----------|-----------|
| Tomodon_dorsatus            | GQ457838  | GQ457777  | KX694882  | -         |
| Xenochrophis_flavipunctatus | AF544780  | AF544809  | -         | -         |
| Xenodermus_javanicus        | AF544781  | AF544810  | AY425810  | U49320    |
| Xenopeltis_unicolor         | NC_007402 | NC_007402 | NC_007402 | NC_007402 |

---

**Colubridae**

| <b>Species</b>             | <b>12s</b>      | <b>16s</b> | <b>Cytb</b>     | <b>ND4</b>      | <b>ND2</b> |
|----------------------------|-----------------|------------|-----------------|-----------------|------------|
| Ahaetulla_fronticincta     | -               | -          | AF471072        | -               | -          |
| Ahaetulla_nasuta           | -               | -          | KC347453        | KC347491        | -          |
| Ahaetulla_prasina          | KX694556        | KX694615   | -               | -               | -          |
| Ahaetulla_pulverulenta     | KC347304        | KC347339   | KC347454        | KC347492        | -          |
| Amphiesma_stolatum         | -               | -          | JQ687432        | JQ687425        | JQ687464   |
| Archelaphe_bella           | -               | -          | DQ902134        | DQ902316        | DQ902248   |
| Atretium_yunnanensis       | -               | -          | GQ281787        | JQ687423        | JQ687463   |
| Boiga_barnesii             | KC347311        | KC347345   | KC347461        | KC347499        | -          |
| Boiga_beddomei             | KC347312        | KC347346   | KC347462        | KC347500        | -          |
| Boiga_ceylonensis          | KC347313        | KC347347   | KC347463        | KC347501        | -          |
| Boiga_cynodon              | Z46468          | AF139568   | -               | -               | -          |
| Boiga_forsteni             | KC347314        | KC347348   | KC347464        | KC347502        | -          |
| Boiga_multomaculata        | -               | -          | FJ710798        | -               | -          |
| Boiga_trigonata            | KC347315        | KC347349   | KC347465        | KC347503        | -          |
| Calamaria_pavimentata      | KX694584        | KX694624   | KX694890        | -               | -          |
| Calamaria_yunnanensis      | KX694572        | KX694625   | KX694891        | -               | -          |
| Chrysopelea_ornata         | KC347318        | KC347353   | KC347469        | KC347506        | -          |
| Chrysopelea_taprobanica    | KC347319        | KC347354   | KC347470        | KC347507        | -          |
| Coelognathus_erythrurus    | AY122665        | -          | DQ902108        | DQ902288        | DQ902215   |
| Coelognathus_flavolineatus | AY122666        | -          | DQ902128        | U49301          | DQ902240   |
| Coelognathus_helena        | AY122674        | -          | DQ902112        | DQ902292        | DQ902219   |
| Coelognathus_radiatus      | AY122677        | -          | DQ902121        | DQ902317        | DQ902230   |
| Coelognathus_subradiatus   | AY122673        | -          | DQ902126        | DQ902304        | DQ902235   |
| Coluber_constrictor        | KX694604        | KX694632   | EU180486        | AF138746        | AY487002   |
| Dendrelaphis_bifrenalis    | KC347321        | KC347356   | KC347473        | KC347509        | -          |
| Dendrelaphis_cyanochloris  | -               | -          | <b>MW111475</b> | <b>MW111431</b> | -          |
| Dendrelaphis_cyanochloris  | -               | -          | KX660454        | KX660580        | -          |
| Dendrelaphis_caudolineatus | AF544782        | AF544811   | GQ895864        | -               | -          |
| Dendrelaphis_formosus      | -               | -          | KX660438        | KX660565        | -          |
| Dendrelaphis_fuliginosus   | -               | -          | KX660512        | KX660638        | -          |
| Dendrelaphis_haasi         | -               | -          | KX660493        | KX660622        | -          |
| Dendrelaphis_marenae       | -               | -          | KX660514        | KX660640        | -          |
| Dendrelaphis_ngansonensis  | -               | KX660158   | -               | KX660561        | -          |
| Dendrelaphis_pictus        | -               | -          | JX678825        | U49304          | -          |
| Dendrelaphis_proarchos     | -               | -          | KX660455        | KX660581        | -          |
| Dendrelaphis_striatus      | -               | -          | KX660495        | KX660624        | -          |
| Dendrelaphis_subocularis   | -               | -          | KX660494        | KX660623        | -          |
| Elaphe_bimaculata          | AY122767        | -          | DQ902104        | DQ902283        | DQ902210   |
| Elaphe_cantoris            | <b>MW114843</b> | -          | -               | -               | -          |
| Elaphe_cantoris            | AY122769        | -          | DQ902135        | DQ902315        | DQ902246   |
| Elaphe_carinata            | AY122839        | HM439983   | DQ902133        | DQ902284        | DQ902211   |

|                         |           |          |                 |          |          |
|-------------------------|-----------|----------|-----------------|----------|----------|
| Elaphe_climacophora     | AY122772  | -        | DQ902105        | DQ902285 | DQ902212 |
| Elaphe_davidi           | AY122775  | -        | -               | -        | -        |
| Elaphe_dione            | AF236673  | -        | DQ902107        | DQ902287 | DQ902214 |
| Elaphe_hodgsoni         | -         | -        | DQ902136        | DQ902318 | DQ902247 |
| Elaphe_moellendorffi    | AY122786  | -        | DQ902116        | DQ902295 | DQ902223 |
| Elaphe_quadrivirgata    | AY122793  | -        | DQ902120        | DQ902300 | DQ902228 |
| Elaphe_quatuorlineata   | AY122796  | AF215267 | AY486931        | AY487067 | AY487028 |
| Elaphe_sauromates       | AY122797  | -        | -               | -        | -        |
| Elaphe_schrenckii       | AF236672  | -        | JQ798790        | DQ902302 | DQ902233 |
| Elaphe_taeiniura        | AY122807  | HM439981 | EF076709        | EF076708 | EF076707 |
| Gonyosoma_boulengeri    | -         | -        | AF471053        | -        | -        |
| Gonyosoma_frenatum      | -         | -        | DQ902110        | DQ902290 | DQ902217 |
| Gonyosoma_janseni       | AY122671  | -        | DQ902113        | DQ902313 | DQ902220 |
| Gonyosoma_oxyccephalum  | AY122678  | KX694646 | KX694870        | DQ902309 | DQ902241 |
| Gonyosoma_prasinum      | -         | -        | DQ902119        | DQ902299 | DQ902227 |
| Hebius_craspedogaster   | -         | -        | JQ687429        | JQ687412 | JQ687459 |
| Hebius_parallelum       | -         | -        | <b>MW111476</b> | -        | -        |
| Herpetoreas_burbrinki   | -         | -        | JQ687443        | JQ687418 | JQ687459 |
| Herpetoreas_platyceps   | -         | -        | <b>MW111464</b> | -        | -        |
| Hypsiglena_torquata     | NC_013992 | EU728591 | AF471038        | U49309   | EU728591 |
| Lycodon_alcalai         | -         | -        | KC010344        | -        | -        |
| Lycodon_aulicus         | -         | -        | HQ735416        | -        | -        |
| Lycodon_bibonius        | -         | -        | KC010351        | -        | -        |
| Lycodon_butleri         | -         | -        | KC010353        | -        | -        |
| Lycodon_carinatus       | -         | KC347352 | KC347468        | -        | -        |
| Lycodon_cavernicolus    | -         | -        | KJ607890        | -        | -        |
| Lycodon_fasciatus       | -         | -        | <b>MW111467</b> | -        | -        |
| Lycodon_fasciatus       | -         | -        | <b>MW111468</b> | -        | -        |
| Lycodon_septentrionalis | -         | -        | <b>MW111469</b> | -        | -        |
| Lycodon_chrysoprateros  | -         | -        | KC010360        | -        | -        |
| Lycodon_dumerilii       | -         | -        | KC010361        | -        | -        |
| Lycodon_effraenis       | -         | -        | KC010376        | -        | -        |
| Lycodon_meridionalis    | -         | -        | <b>MW111470</b> | -        | -        |
| Lycodon_futsingensis    | -         | -        | KC733209        | -        | -        |
| Lycodon_gongshan        | -         | -        | KP901024        | -        | -        |
| Lycodon_jara            | -         | -        | KC010367        | -        | -        |
| Lycodon_laoensis        | Z46455    | Z46485   | KC010368        | -        | -        |
| Lycodon_muelleri        | -         | -        | KC010373        | -        | -        |
| Lycodon_multizonatus    | -         | -        | KF732926        | -        | -        |
| Lycodon_paucifasciatus  | -         | EU999213 | -               | -        | -        |
| Lycodon_rufozonatus     | -         | -        | KC733194        | -        | -        |
| Lycodon_ruhstrati       | -         | EU999209 | KC010381        | -        | -        |
| Lycodon_stormi          | -         | -        | KC010380        | -        | -        |
| Lycodon_subcinctus      | -         | -        | KC733203        | -        | -        |

|                             |                 |                 |                 |          |           |
|-----------------------------|-----------------|-----------------|-----------------|----------|-----------|
| Lycodon_synaptor            | -               | -               | <b>MW111471</b> | -        | -         |
| Lycodon_zawi                | -               | -               | AF471040        | -        | -         |
| Oligodon_arnensis           | KC347327        | KC347365        | KC347481        | KC347518 | -         |
| Oligodon_calamarius         | KC347328        | KC347329        | -               | -        | -         |
| Oligodon_ornatus            | <b>MW133293</b> | <b>MW090136</b> | -               | -        | -         |
| Oligodon_chinensis          | HM591524        | HM591527        | -               | -        | -         |
| Oligodon_cinereus           | HM591503        | HM591508        | AF471033        | -        | -         |
| Oligodon_cruentatus         | HM591517        | HM591517        | -               | -        | -         |
| Oligodon_cyclurus           | HM591535        | HM591536        | -               | -        | -         |
| Oligodon_fasciolatus        | <b>MW133294</b> | <b>MW090137</b> | -               | -        | -         |
| Oligodon_formosanus         | HM591532        | HM591533        | -               | -        | -         |
| Oligodon_lacroixi           | <b>MW133295</b> | <b>MW090138</b> | -               | -        | -         |
| Oligodon_lipipengi          | <b>MW133296</b> | <b>MW090139</b> | -               | -        | -         |
| Oligodon_maculatus          | HM591511        | HM591511        | -               | -        | -         |
| Oligodon_modestus           | HM591498        | -               | -               | -        | -         |
| Oligodon_nagao              | <b>MW133297</b> | <b>MW090140</b> | -               | -        | -         |
| Oligodon_ocellatus          | <b>MW133298</b> | <b>MW090141</b> | -               | -        | -         |
| Oligodon_octolineatus       | HM591519        | HM591519        | -               | -        | -         |
| Oligodon_planiceps          | HM591514        | HM591514        | -               | -        | -         |
| Oligodon_sp                 | <b>MW133299</b> | <b>MW090142</b> | -               | -        | -         |
| Oligodon_splendidus         | HM591510        | HM591510        | -               | -        | -         |
| Oligodon_sublineatus        | KC347329        | KC347367        | KC347483        | KC347520 | -         |
| Oligodon_taeinatus          | HM591520        | HM591522        | -               | -        | -         |
| Oligodon_theobaldi          | HM591516        | HM591516        | -               | -        | -         |
| Oligodon_torquatus          | HM591513        | HM591513        | -               | -        | -         |
| Oligodon_venustus_          | HM591500        | -               | -               | -        | -         |
| Oreocryptophis_porphyraceus | NC_012770       | NC_012770       | DQ902118        | DQ902298 | NC_012770 |
| Pseudoxenodon_bambusicola   | JQ598833        | JQ598893        | -               | -        | -         |
| Pseudoxenodon_karlschmidti  | KX694578        | KX694676        | KX694893        | -        | -         |
| Pseudoxenodon_macrops       | JQ598835        | JQ598895        | JQ598949        | -        | -         |
| Pseudoxenodon_stejnegeri    | -               | <b>MW090133</b> | -               | -        | -         |
| Ptyas_carinata              | -               | KX660238        | -               | -        | -         |
| Ptyas_dhumnades             | <b>MW133300</b> | <b>MW090134</b> | -               | -        | -         |
| Ptyas_fusca                 | -               | KX660202        | -               | -        | -         |
| Ptyas_korros                | KX694591        | KX694663        | KX694869        | AY487062 | AY487023  |
| Ptyas_luzonensis            | -               | KX660251        | -               | -        | -         |
| Ptyas_mucosa                | AY122828        | FJ907950        | AF471054        | AY487063 | AY487024  |
| Ptyas_nigromarginata        | <b>MW133301</b> | <b>MW090135</b> | -               | -        | -         |
| Rhabdophis_adleri           | -               | -               | <b>MW111465</b> | -        | -         |
| Rhabdophis_guangdongensis   | -               | -               | KF800930        | -        | -         |
| Rhabdophis_himalayanus      | -               | -               | -               | -        | -         |
| Rhabdophis_leonardi         | -               | -               | <b>MW111472</b> | -        | -         |
| Rhabdophis_nigrocinctus     | -               | -               | <b>MW111473</b> | -        | -         |
| Rhabdophis_nuchalis         | AF236678        | -               | GQ281786        | JQ687413 | JQ687454  |

|                                      |              |           |           |           |           |
|--------------------------------------|--------------|-----------|-----------|-----------|-----------|
| <i>Rhabdophis_pentastriatus</i>      | -            | -         | KF800934  | -         | -         |
| <i>Rhabdophis_subminiatus</i>        | AF544776     | AF544805  | JQ598951  | JQ687411  | -         |
| <i>Rhabdophis_swinhoni</i>           | -            | -         | AB842176  | -         | -         |
| <i>Rhabdophis_tigrinus</i>           | AF236679     | -         | GQ281785  | JQ687419  | JQ687460  |
| <i>Sibynophis_bistrigatus</i>        | -            | -         | KC000127  | -         | KC000130  |
| <i>Sibynophis_chinensis</i>          | -            | -         | KC000124  | -         | KC000131  |
| <i>Sibynophis_collaris</i>           | KX694581     | KX694665  | KC000121  | JN211315  | KC000133  |
| <i>Sibynophis_triangularis</i>       | -            | -         | KC000123  | -         | KC000132  |
| <i>Thamnophis_sirtalis</i>           | KX694574     | KX694670  | AF420193  | AF420196  | DQ995365  |
| <i>Thermophis_baileyi</i>            | -            | -         | EU496919  | JN564723  | JN559862  |
| <i>Thermophis_zhaoermii</i>          | GQ166168     | GQ166168  | GQ166168  | GQ166168  | GQ166168  |
| <i>Trachischium_guentheri</i>        | -            | -         | MN306288  | -         | -         |
| <i>Trachischium_monticola</i>        | -            | -         | MN306290  | -         | -         |
| <i>Trachischium_tenuiceps</i>        | -            | -         | MN306289  | -         | -         |
| <i>Xenochrophis_flavipunctatus</i>   | AF544780     | AF544809  | -         | -         | FJ416748  |
| <i>Xenochrophis_piscator</i>         | GQ225679     | -         | GQ225659  | -         | -         |
| <i>Xenochrophis_punctulatus</i>      | -            | -         | AF471079  | AY487074  | AY487035  |
| <i>Xenochrophis_schnurrenbergeri</i> | GQ225678     | -         | GQ225660  | -         | -         |
| <b>Outgroup</b>                      |              |           |           |           |           |
| <i>Achalinus_meiguensis</i>          | FJ424614     | FJ424614  | FJ424614  | FJ424614  | FJ424614  |
| <i>Achalinus_rufescens</i>           | KX694570     | KX694613  | KX694895  | U49319    | -         |
| <i>Acrochordus_granulatus</i>        | AB177879     | NC007400  | NC_007400 | NC_007400 | NC_007400 |
| <i>Acrochordus_javanicus</i>         | KX694587     | KX694614  | KX694897  | HM234055  | -         |
| <i>Anilius_scytale</i>               | FJ755180     | NC_014343 | FJ755180  | FJ755180  | NC_014343 |
| <i>Azemiops_feae</i>                 | KX694579     | KX694684  | KX694840  | AY352808  | -         |
| <i>Bitis_arietans</i>                | KX694571     | KX694619  | KX694845  | EU852304  | JX073288  |
| <i>Boa_constrictor</i>               | NC_007398    | NC_007398 | AF471036  | NC_007398 | NC_007398 |
| <i>Broghammerus_reticulatus</i>      | Z46448       | -         | FJ717481  | -         | -         |
| <i>Cantoria_violacea</i>             | KX694595     | KX694627  | KX694852  | -         | -         |
| <i>Cerberus_rynchops</i>             | KX694596     | KX694630  | KX694850  | U49327    | -         |
| <i>Crotalus_cerastes</i>             | AF259235     | AF259128  | U69773    | JN620962  | AY016245  |
| <i>Cylindrophis_ruffus</i>           | NC_007401    | NC_007401 | NC_007401 | NC_007401 | NC_007401 |
| <i>Deinagkistrodon_acutus</i>        | KX694593     | KX694683  | KX694847  | AY352811  | DQ343647  |
| <i>Eryx_colubrinus</i>               | AF544747     | -         | U69811    | -         | -         |
| <i>Eunectes_notaeus</i>              | AM236347     | -         | AM236347  | AM236347  | AM236347  |
| <i>Indotyphlops_braminus</i>         | DQ343649     | NC_010196 | DQ343649  | NC_010196 | NC_010196 |
| <i>Loxocemus_bicolor</i>             | Z46456       | -         | AY099993  | -         | -         |
| <i>Micrurus_surinamensis</i>         | AF544770     | AF544799  | EF137415  | EF137407  | -         |
| <i>Naja_atra</i>                     | KX694544     | KX694689  | KX694859  | EU921898  | EU921898  |
| <i>Psammophis_mossambicus</i>        | KX694547     | KX694660  | KX694878  | DQ486283  | -         |
| <i>Sistrurus_catenatus</i>           | DQ464268     | AF259119  | AY223610  | HQ257759  | GQ359800  |
| <i>Vipera_ammodytes</i>              | EU624266     | EU624297  | AM944799  | EU624232  | AM944799  |
| <i>Xenopeltis_unicolor</i>           | NC_007402    | NC_007402 | NC_007402 | NC_007402 | NC_007402 |
| <b>Species</b>                       | <b>C-mos</b> |           |           |           |           |



|                            |                 |
|----------------------------|-----------------|
| Ahaetulla_fronticincta     | AF471161        |
| Ahaetulla_nasuta           | KC347377        |
| Ahaetulla_prasina          | KX694801        |
| Ahaetulla_pulverulenta     | KC347378        |
| Amphiesma_stolatum         | JQ687450        |
| Archelaphe_bella           | DQ902097        |
| Atretium_yunnanensis       | JQ687448        |
| Boiga_barnesii             | KC347385        |
| Boiga_beddomei             | KC347386        |
| Boiga_ceylonensis          | KC347387        |
| Boiga_cynodon              | -               |
| Boiga_forsteni             | KC347388        |
| Boiga_multomaculata        | FJ710797        |
| Boiga_trigonata            | KC347389        |
| Calamaria_pavimentata      | KX694804        |
| Calamaria_yunnanensis      | KX694805        |
| Chrysopelea_ornata         | KC347393        |
| Chrysopelea_taprobatica    | KC347394        |
| Coelognathus_erythrurus    | DQ902067        |
| Coelognathus_flavolineatus | DQ902090        |
| Coelognathus_helena        | DQ902071        |
| Coelognathus_radiatus      | DQ902079        |
| Coelognathus_subradiatus   | DQ902084        |
| Coluber_constrictor        | KX694806        |
| Dendrelaphis_bifrenalis    | KC347397        |
| Dendrelaphis_cyanochloris  | <b>MW111502</b> |
| Dendrelaphis_cyanochloris  | KX660320        |
| Dendrelaphis_caudolineatus | GQ895808        |
| Dendrelaphis_formosus      | KX660301        |
| Dendrelaphis_fuliginosus   | KX660383        |
| Dendrelaphis_haasi         | KX660365        |
| Dendrelaphis_marenae       | KX660385        |
| Dendrelaphis_ngansonensis  | KX660297        |
| Dendrelaphis_pictus        | -               |
| Dendrelaphis_proarchos     | KX660321        |
| Dendrelaphis_striatus      | KX660367        |
| Dendrelaphis_subocularis   | KX660366        |
| Elaphe_bimaculata          | DQ902062        |
| Elaphe_cantoris            | -               |
| Elaphe_cantoris            | DQ902095        |
| Elaphe_carinata            | DQ902063        |
| Elaphe_climacophora        | DQ902064        |
| Elaphe_davidi              | -               |
| Elaphe_dione               | DQ902066        |

|                         |                 |
|-------------------------|-----------------|
| Elaphe_hodgsoni         | DQ902096        |
| Elaphe_moellendorffi    | DQ902074        |
| Elaphe_quadrivirgata    | DQ902078        |
| Elaphe_quatuorlineata   | AY486955        |
| Elaphe_sauromates       | -               |
| Elaphe_schrenckii       | DQ902082        |
| Elaphe_taeniura         | EF076705        |
| Gonyosoma_boulengeri    | AF471153        |
| Gonyosoma_frenatum      | DQ902069        |
| Gonyosoma_janseni       | DQ902100        |
| Gonyosoma_oxycephalum   | KX694808        |
| Gonyosoma_prasinum      | DQ902077        |
| Hebius_craspedogaster   | JQ687437        |
| Hebius_parallelum       | <b>MW111503</b> |
| Herpetoreas_burbrinki   | GQ281781        |
| Herpetoreas_platyceps   | <b>MW111514</b> |
| Hypsiglena_torquata     | AF471159        |
| Lycodon_alcalai         | KC010303        |
| Lycodon_aulicus         | HQ735418        |
| Lycodon_bibonius        | KC010309        |
| Lycodon_butleri         | KC010311        |
| Lycodon_carinatus       | KC347392        |
| Lycodon_cavernicolus    | -               |
| Lycodon_fasciatus       | <b>MW111504</b> |
| Lycodon_fasciatus       | <b>MW111505</b> |
| Lycodon_septentrionalis | <b>MW111506</b> |
| Lycodon_chrysoprateros  | KC010318        |
| Lycodon_dumerilii       | KC010319        |
| Lycodon_effraenis       | KC010328        |
| Lycodon_meridionalis    | <b>MW111507</b> |
| Lycodon_futsingensis    | KC733225        |
| Lycodon_gongshan        | KP901016        |
| Lycodon_jara            | KC010322        |
| Lycodon_laoensis        | KC010323        |
| Lycodon_muelleri        | KC010326        |
| Lycodon_multizonatus    | KF732933        |
| Lycodon_paucifasciatus  | -               |
| Lycodon_rufozonatus     | KC733211        |
| Lycodon_ruhstrati       | KC010332        |
| Lycodon_stormi          | KC010331        |
| Lycodon_subcinctus      | KC733220        |
| Lycodon_synaptor        | <b>MW111508</b> |
| Lycodon_zawi            | AF471111        |
| Oligodon_arnensis       | KC347405        |

|                             |                 |
|-----------------------------|-----------------|
| Oligodon_calamarius         | -               |
| Oligodon_ornatus            | -               |
| Oligodon_chinensis          | -               |
| Oligodon_cinereus           | AF471101        |
| Oligodon_cruentatus         | -               |
| Oligodon_cyclurus           | -               |
| Oligodon_fasciolatus        | -               |
| Oligodon_formosanus         | -               |
| Oligodon_lacroixi           | -               |
| Oligodon_lipipengi          | -               |
| Oligodon_maculatus          | -               |
| Oligodon_modestus           | -               |
| Oligodon_nagao              | -               |
| Oligodon_ocellatus          | -               |
| Oligodon_octolineatus       | -               |
| Oligodon_planiceps          | -               |
| Oligodon_sp                 | -               |
| Oligodon_splendidus         | -               |
| Oligodon_sublineatus        | KC347407        |
| Oligodon_taeiniatus         | -               |
| Oligodon_theobaldi          | -               |
| Oligodon_torquatus          | -               |
| Oligodon_venustus_          | -               |
| Oreocryptophis_porphyraceus | DQ902076        |
| Pseudoxenodon_bambusicola   | JQ598996        |
| Pseudoxenodon_karlschmidti  | KX694816        |
| Pseudoxenodon_macrops       | -               |
| Pseudoxenodon_stejnegeri    | <b>MW111492</b> |
| Ptyas_carinata              | KX660379        |
| Ptyas_dhumnades             | <b>MW111493</b> |
| Ptyas_fusca                 | KX660342        |
| Ptyas_korros                | KX694817        |
| Ptyas_luzonensis            | KX660392        |
| Ptyas_mucosa                | AF471151        |
| Ptyas_nigromarginata        | <b>MW111494</b> |
| Rhabdophis_adleri           | <b>MW111495</b> |
| Rhabdophis_guangdongensis   | KF800920        |
| Rhabdophis_himalayanus      | <b>MW111496</b> |
| Rhabdophis_leonardi         | <b>MW111497</b> |
| Rhabdophis_nigrocinctus     | <b>MW111498</b> |
| Rhabdophis_nuchalis         | JQ687438        |
| Rhabdophis_pentaprasinialis | KF800924        |
| Rhabdophis_subminiatus      | JQ687436        |
| Rhabdophis_swinhoni         | AB861888        |

|                               |                 |
|-------------------------------|-----------------|
| Rhabdophis_tigrinus           | JQ687444        |
| Sibynophis_bistrigatus        | KC000112        |
| Sibynophis_chinensis          | KC000113        |
| Sibynophis_collaris           | KX694818        |
| Sibynophis_triangularis       | KC000116        |
| Thamnophis_sirtalis           | DQ902094        |
| Thermophis_baileyi            | EU496922        |
| Thermophis_zhaoermii          | -               |
| Trachischium_guentheri        | <b>MW111499</b> |
| Trachischium_monticola        | <b>MW111501</b> |
| Trachischium_tenuiceps        | <b>MW111500</b> |
| Xenochrophis_flavipunctatus   | AF544714        |
| Xenochrophis_piscator         | GQ225669        |
| Xenochrophis_punctulatus      | AF471106        |
| Xenochrophis_schnurrenbergeri | GQ225668        |
| <b>Outgroup</b>               |                 |
| Achalinus_meiguensis          | -               |
| Achalinus_rufescens           | -               |
| Acrochordus_granulatus        | KX694800        |
| Acrochordus_javanicus         | -               |
| Anilius_scytale               | AF544722        |
| Azemiops_feae                 | KX694774        |
| Bitis_arietans                | -               |
| Boa_constrictor               | AF471115        |
| Brogammerus_reticulatus       | AF544675        |
| Cantoria_violacea             | EF395922        |
| Cerberus_rynchops             | KX694779        |
| Crotalus_cerastes             | JN620894        |
| Cylindrophis_ruffus           | AF471133        |
| Deinagkistrodon_acutus        | KX694782        |
| Eryx_colubrinus               | AF544716        |
| Eunectes_notaeus              | KX694783        |
| Indotyphlops_braminus         | AY099980        |
| Loxocemus_bicolor             | AF544730        |
| Micrurus_surinamensis         | EF137422        |
| Naja_atra                     | KX694797        |
| Psammophis_mossambicus        | DQ486185        |
| Sistrurus_catenatus           | -               |
| Vipera_ammodytes              | -               |
| Xenopeltis_unicolor           | AY099977        |

---

**Data S6.**

Time trees with calibration dates indicated. The estimated dates and confidence limits for each corresponding event are presented in **Table S2** and **Table S3**. The red triangles indicate fossil calibrations, and black triangles indicate secondary calibrations (see **Table S5** for a list all calibrations and their citations).

# Agamidae

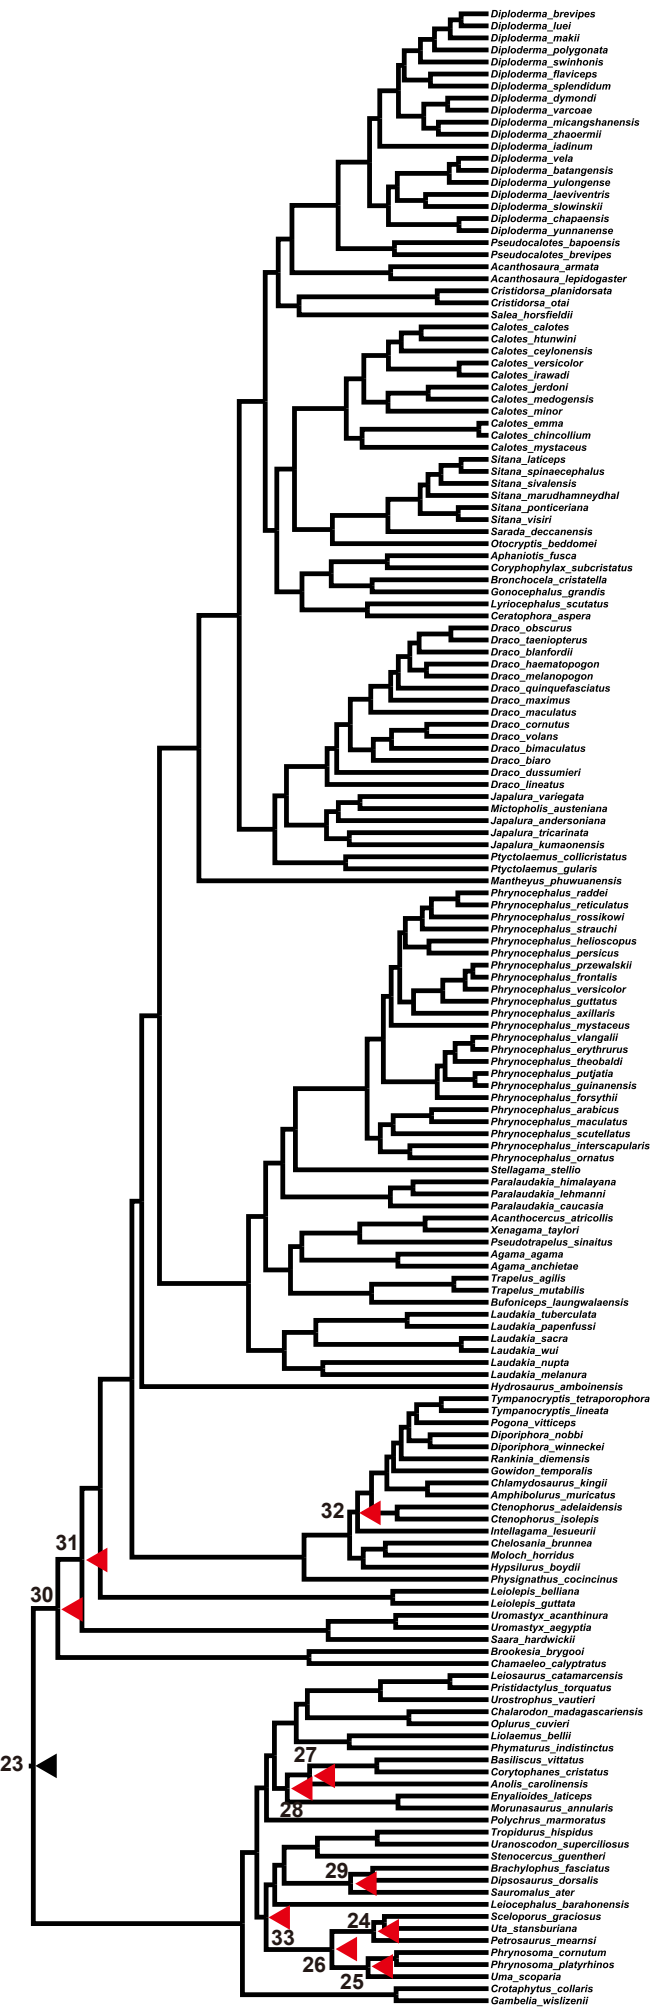

# Anguillidae

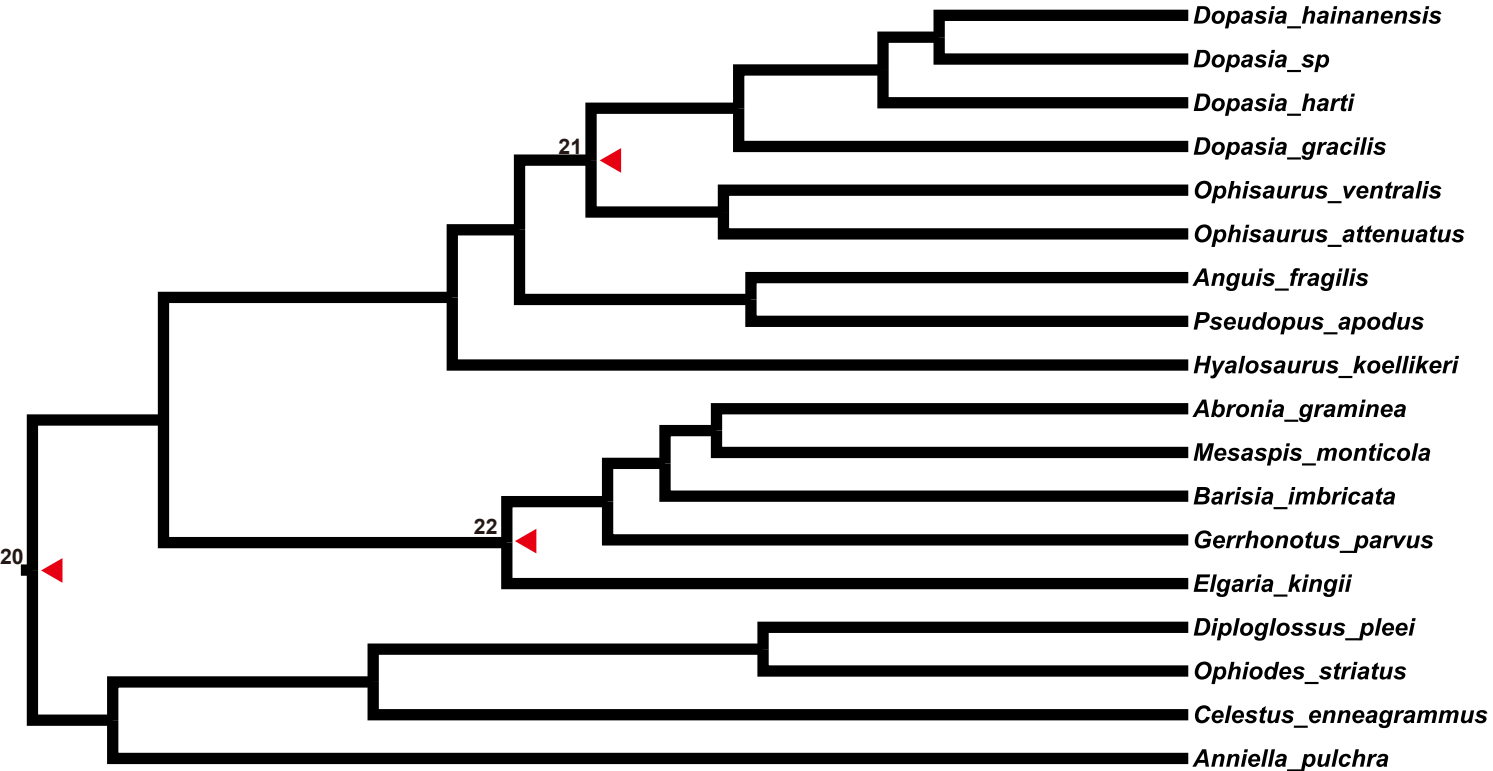

# Bufoidea

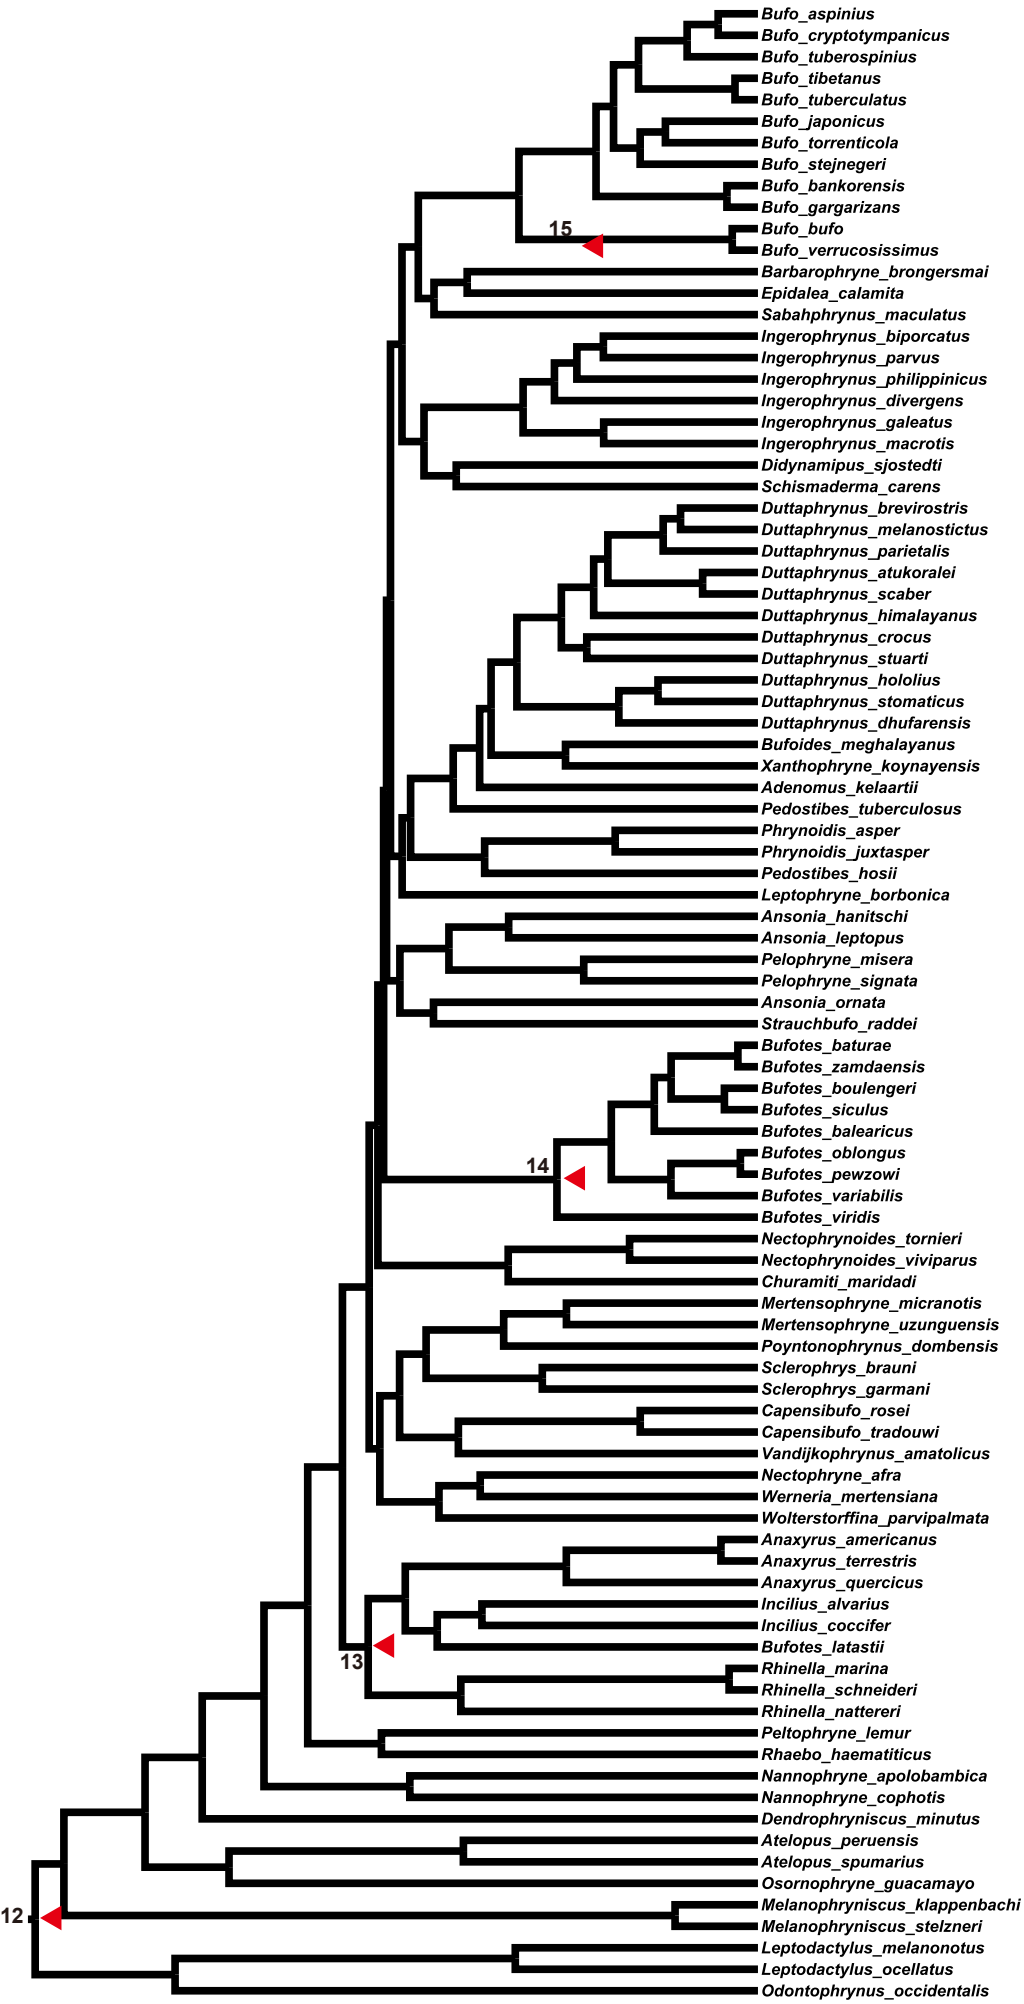



# Ceratobatrachidae

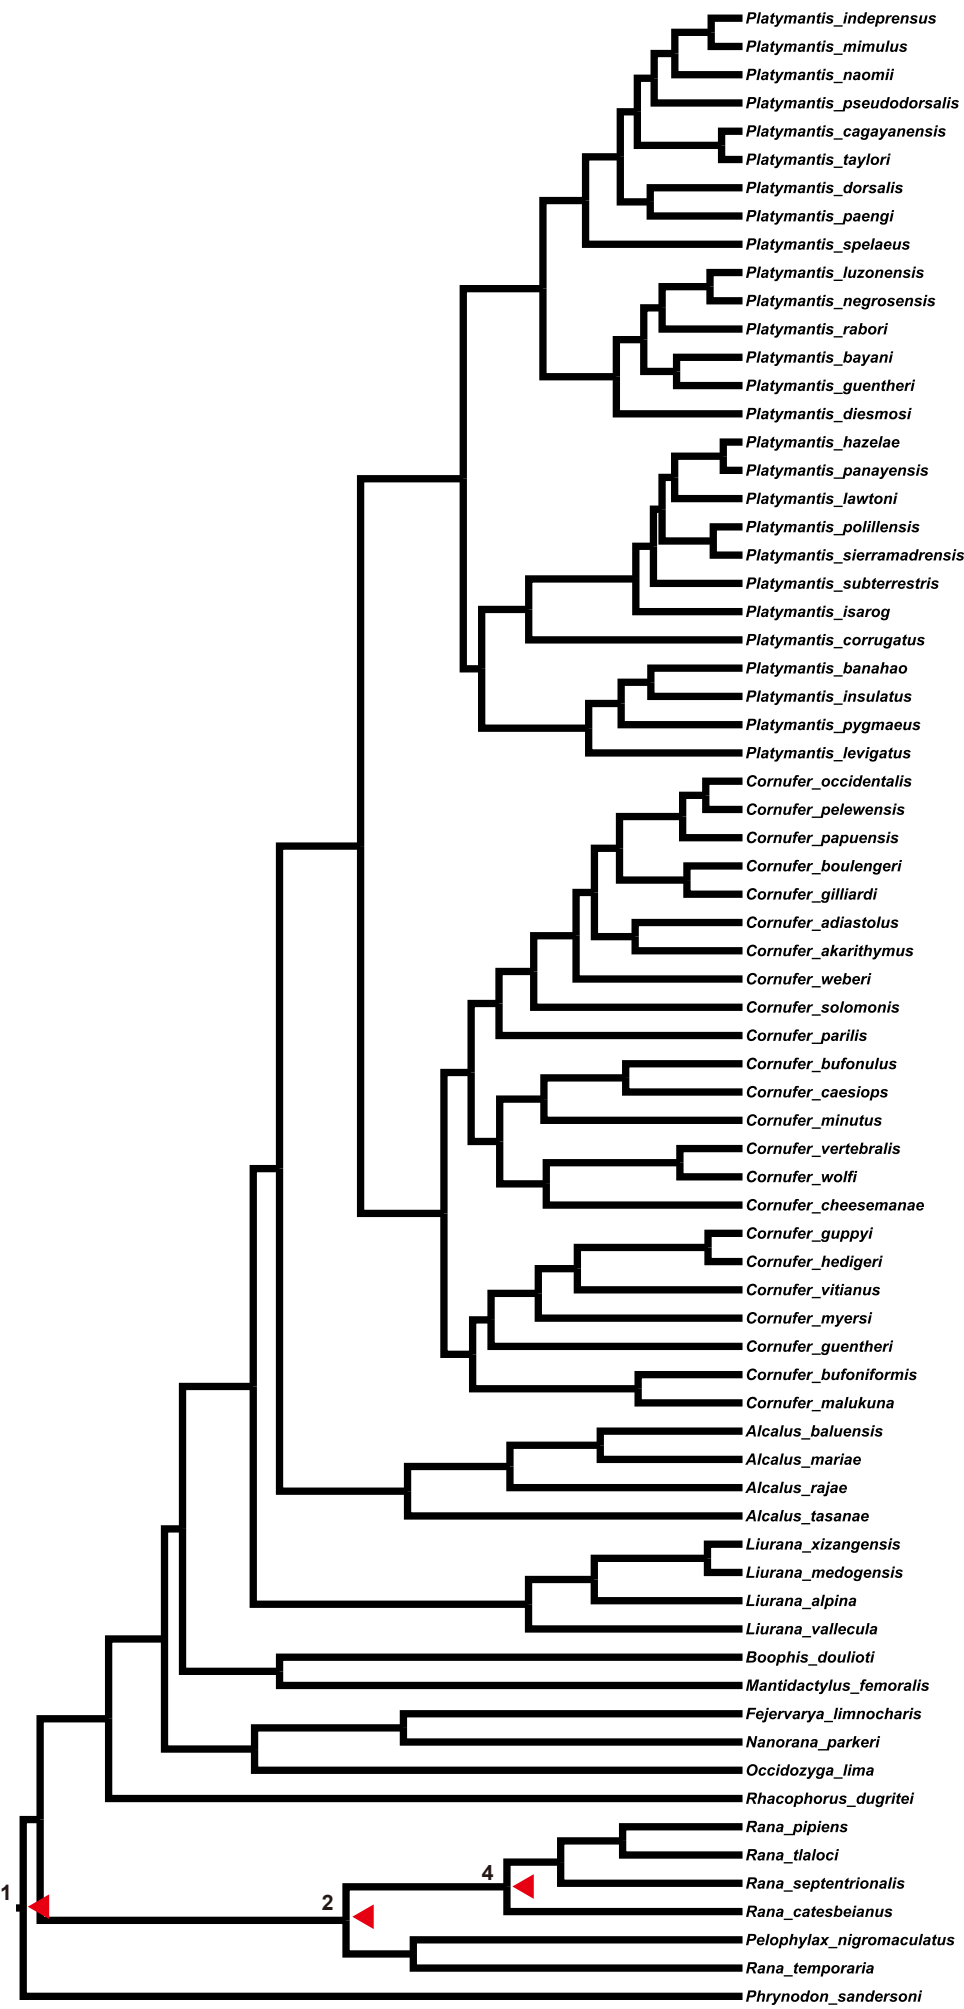

# Colubridae

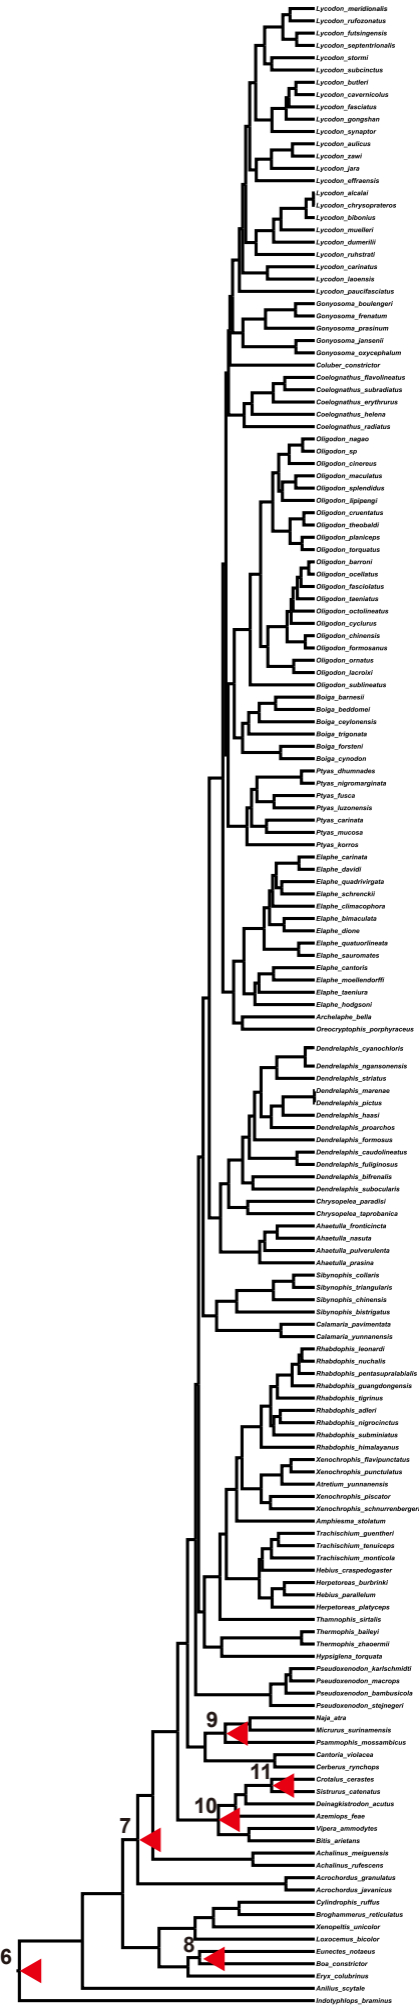

# Dicroglossidae

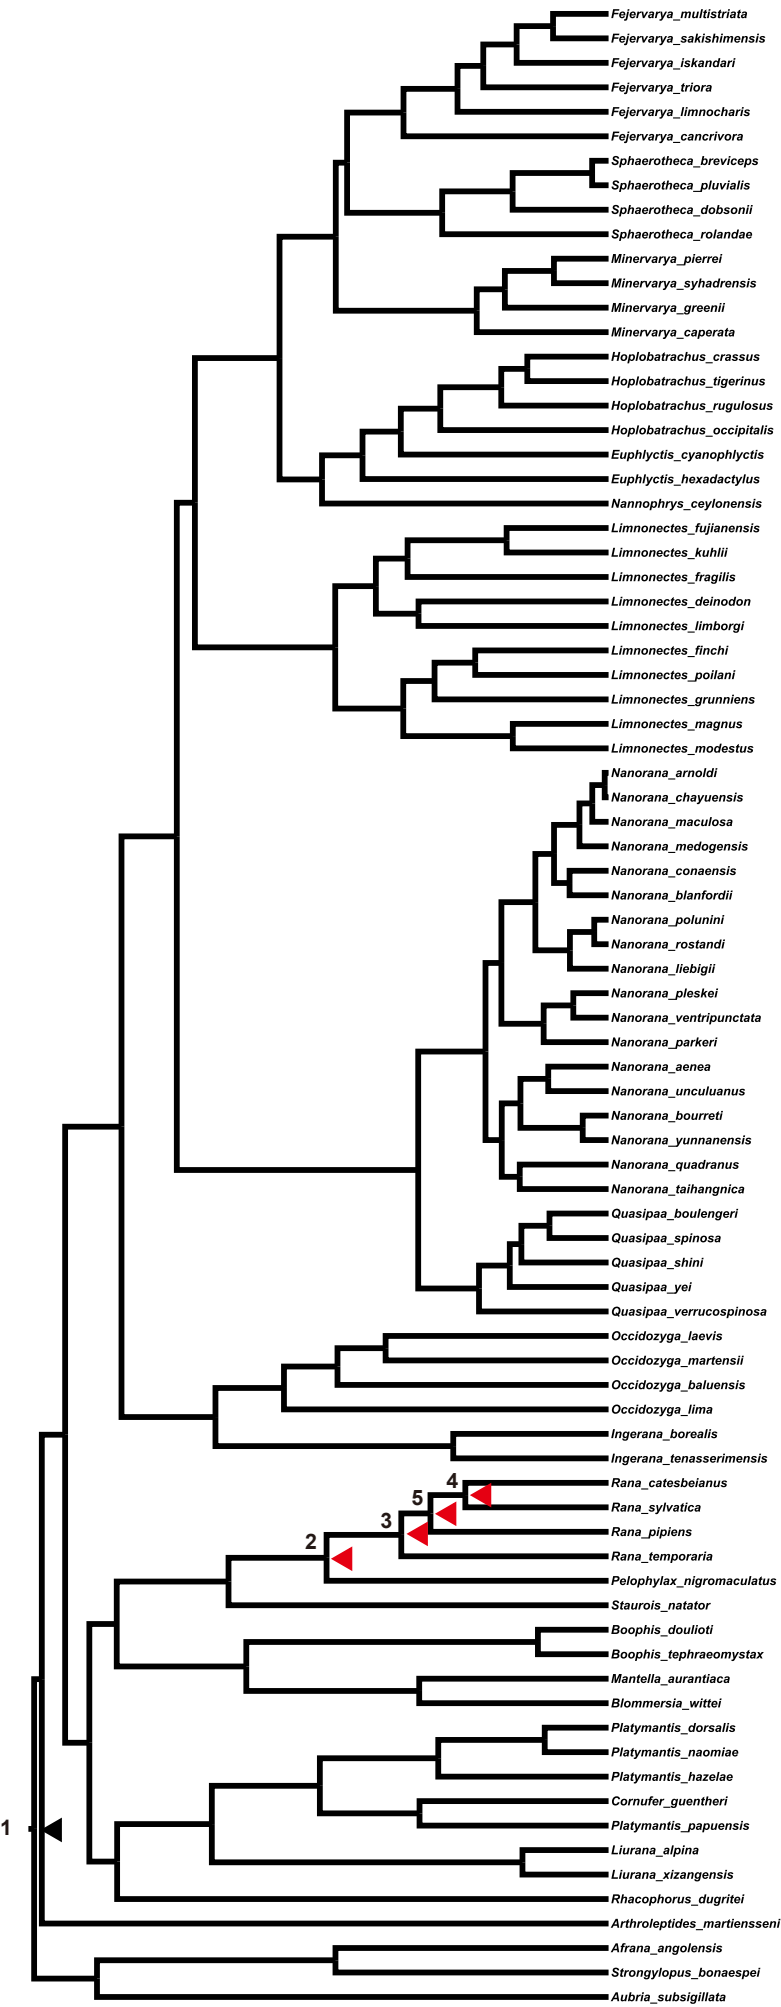

# Elapidae

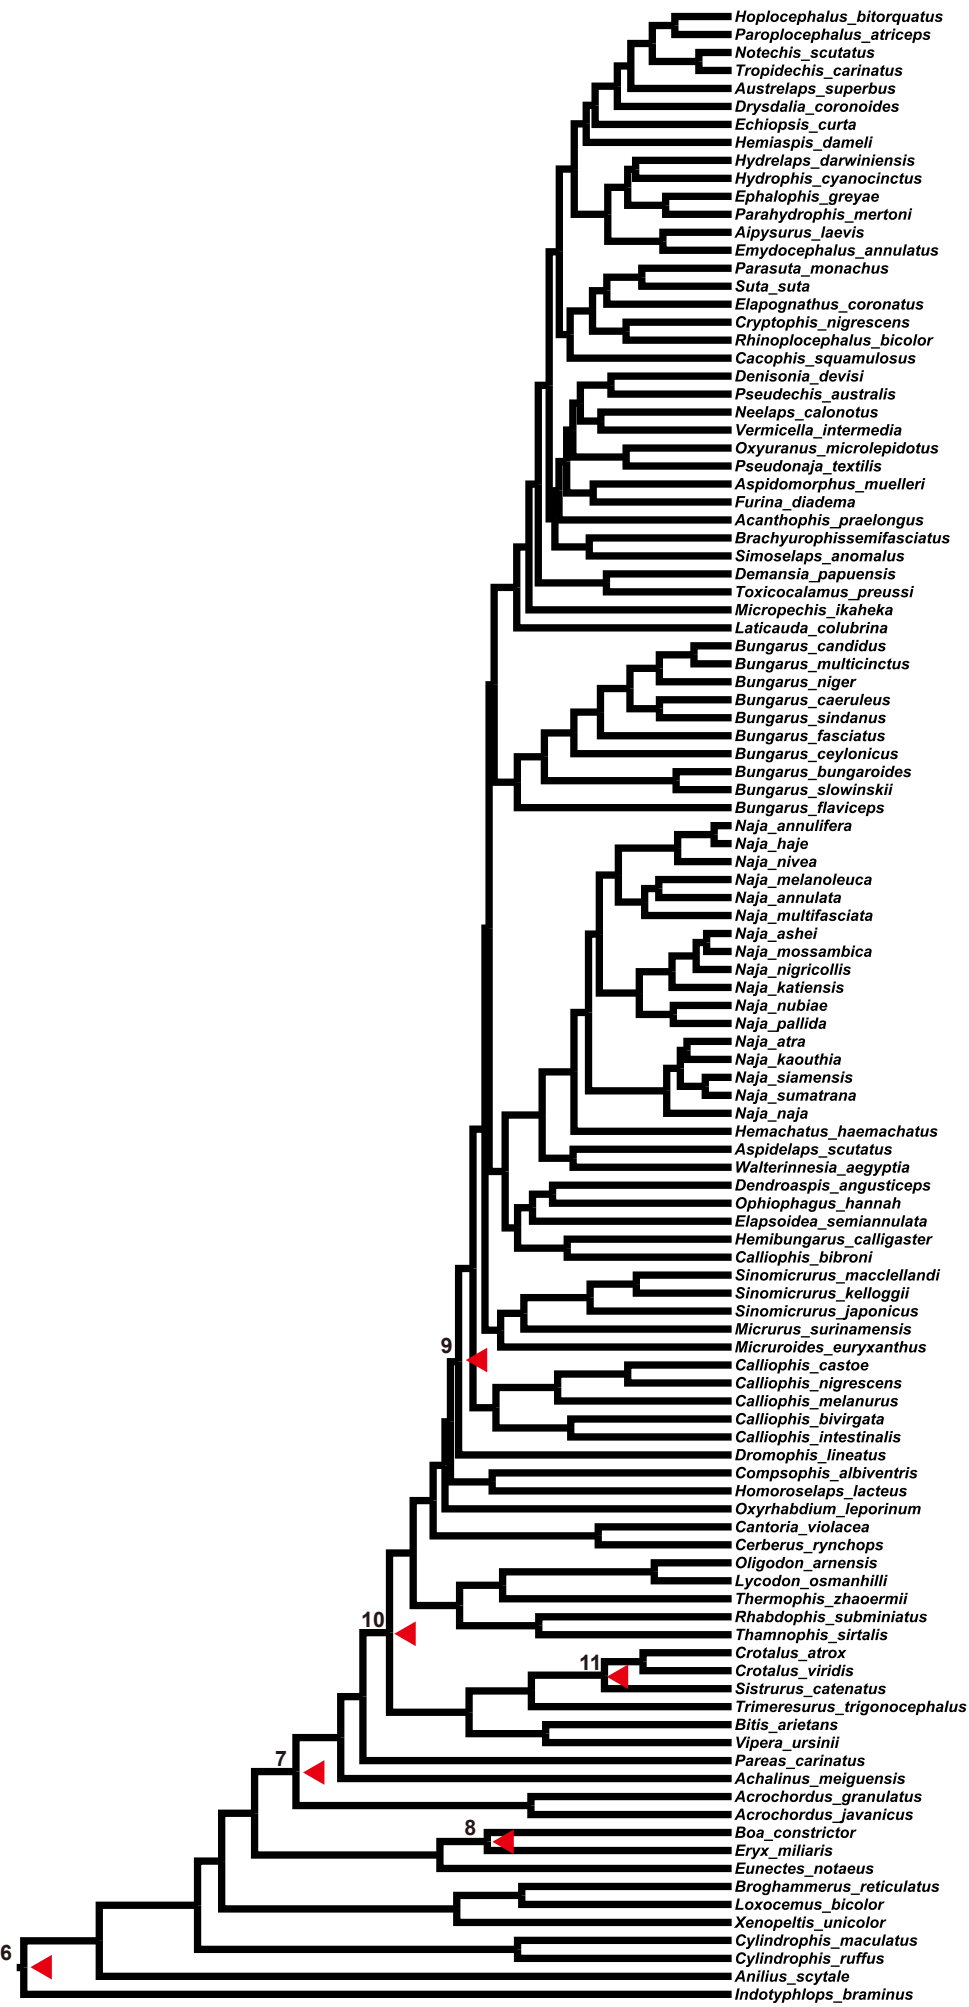

# Gekkonidae

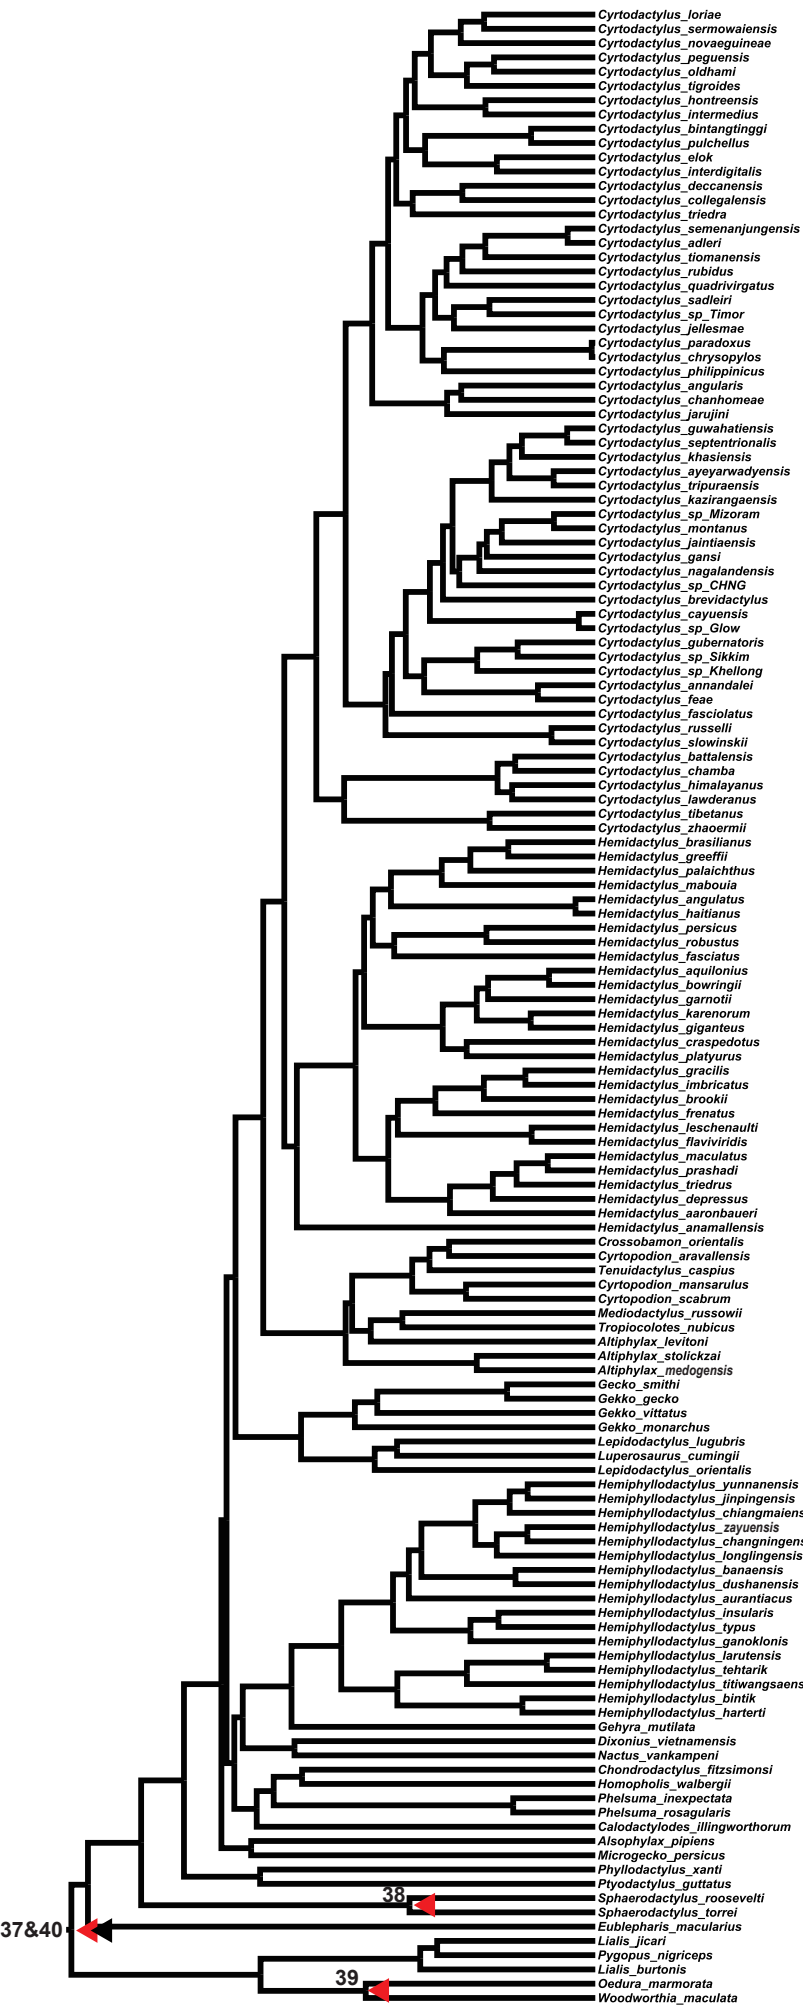

# Megophryidae

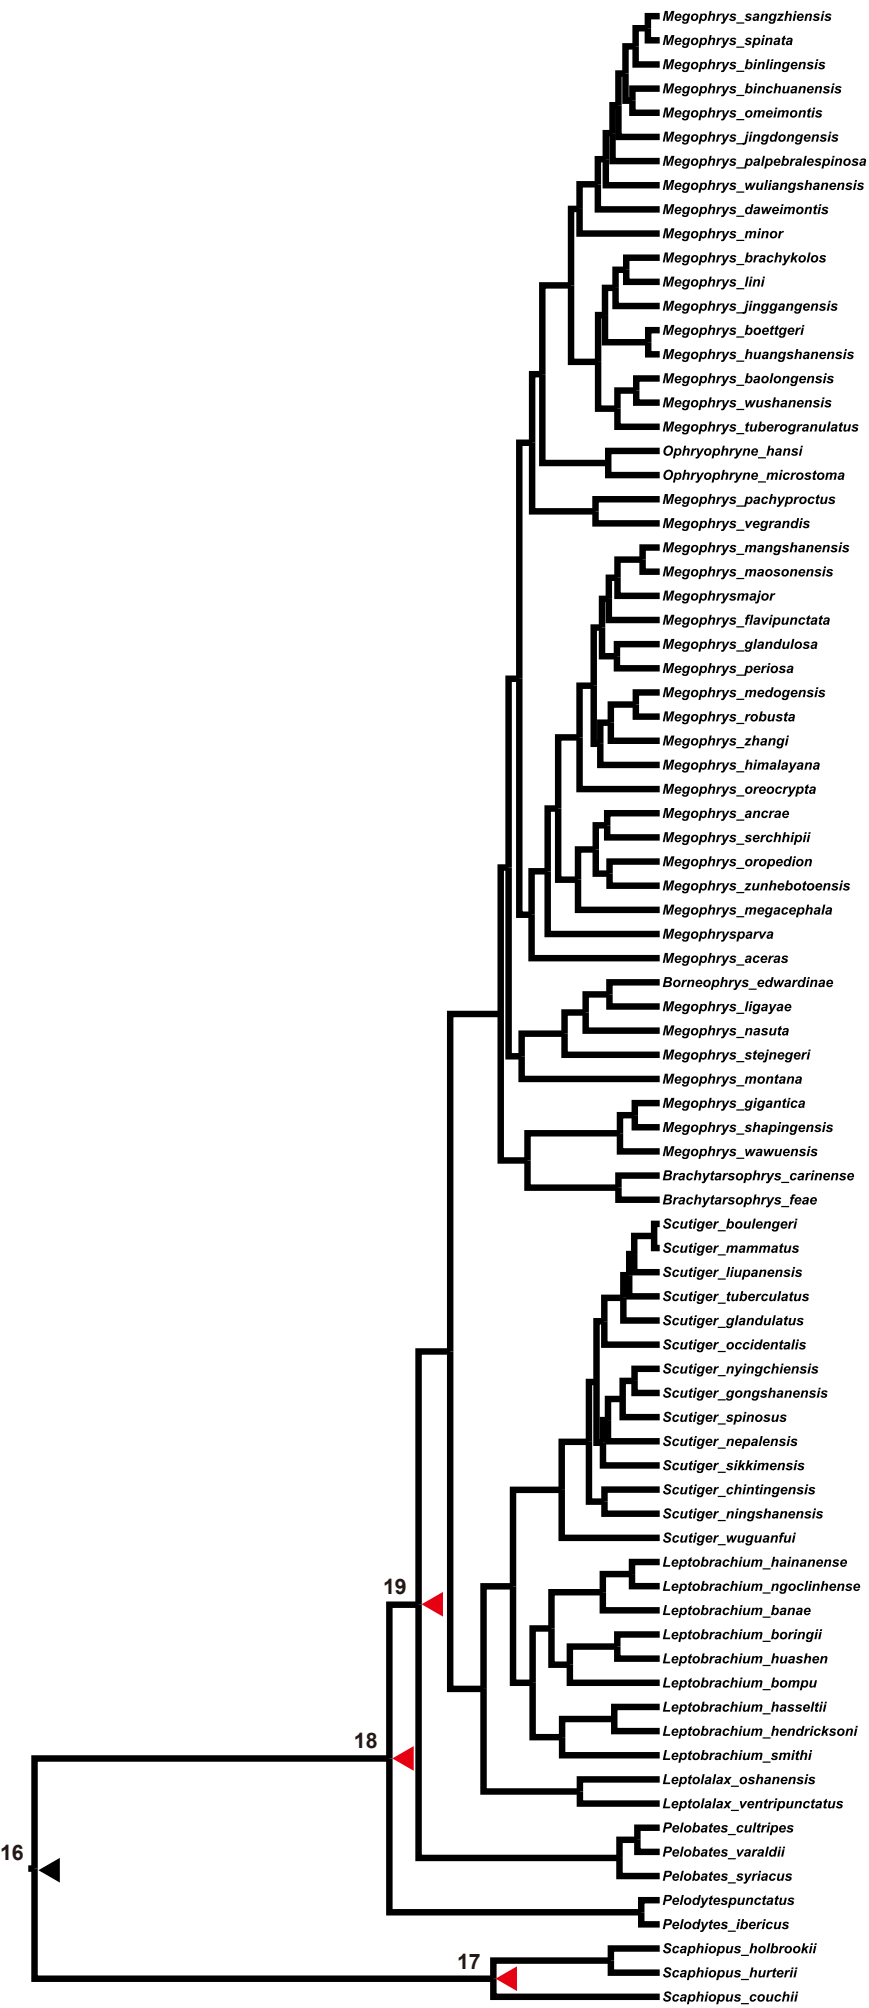

# Pareidae

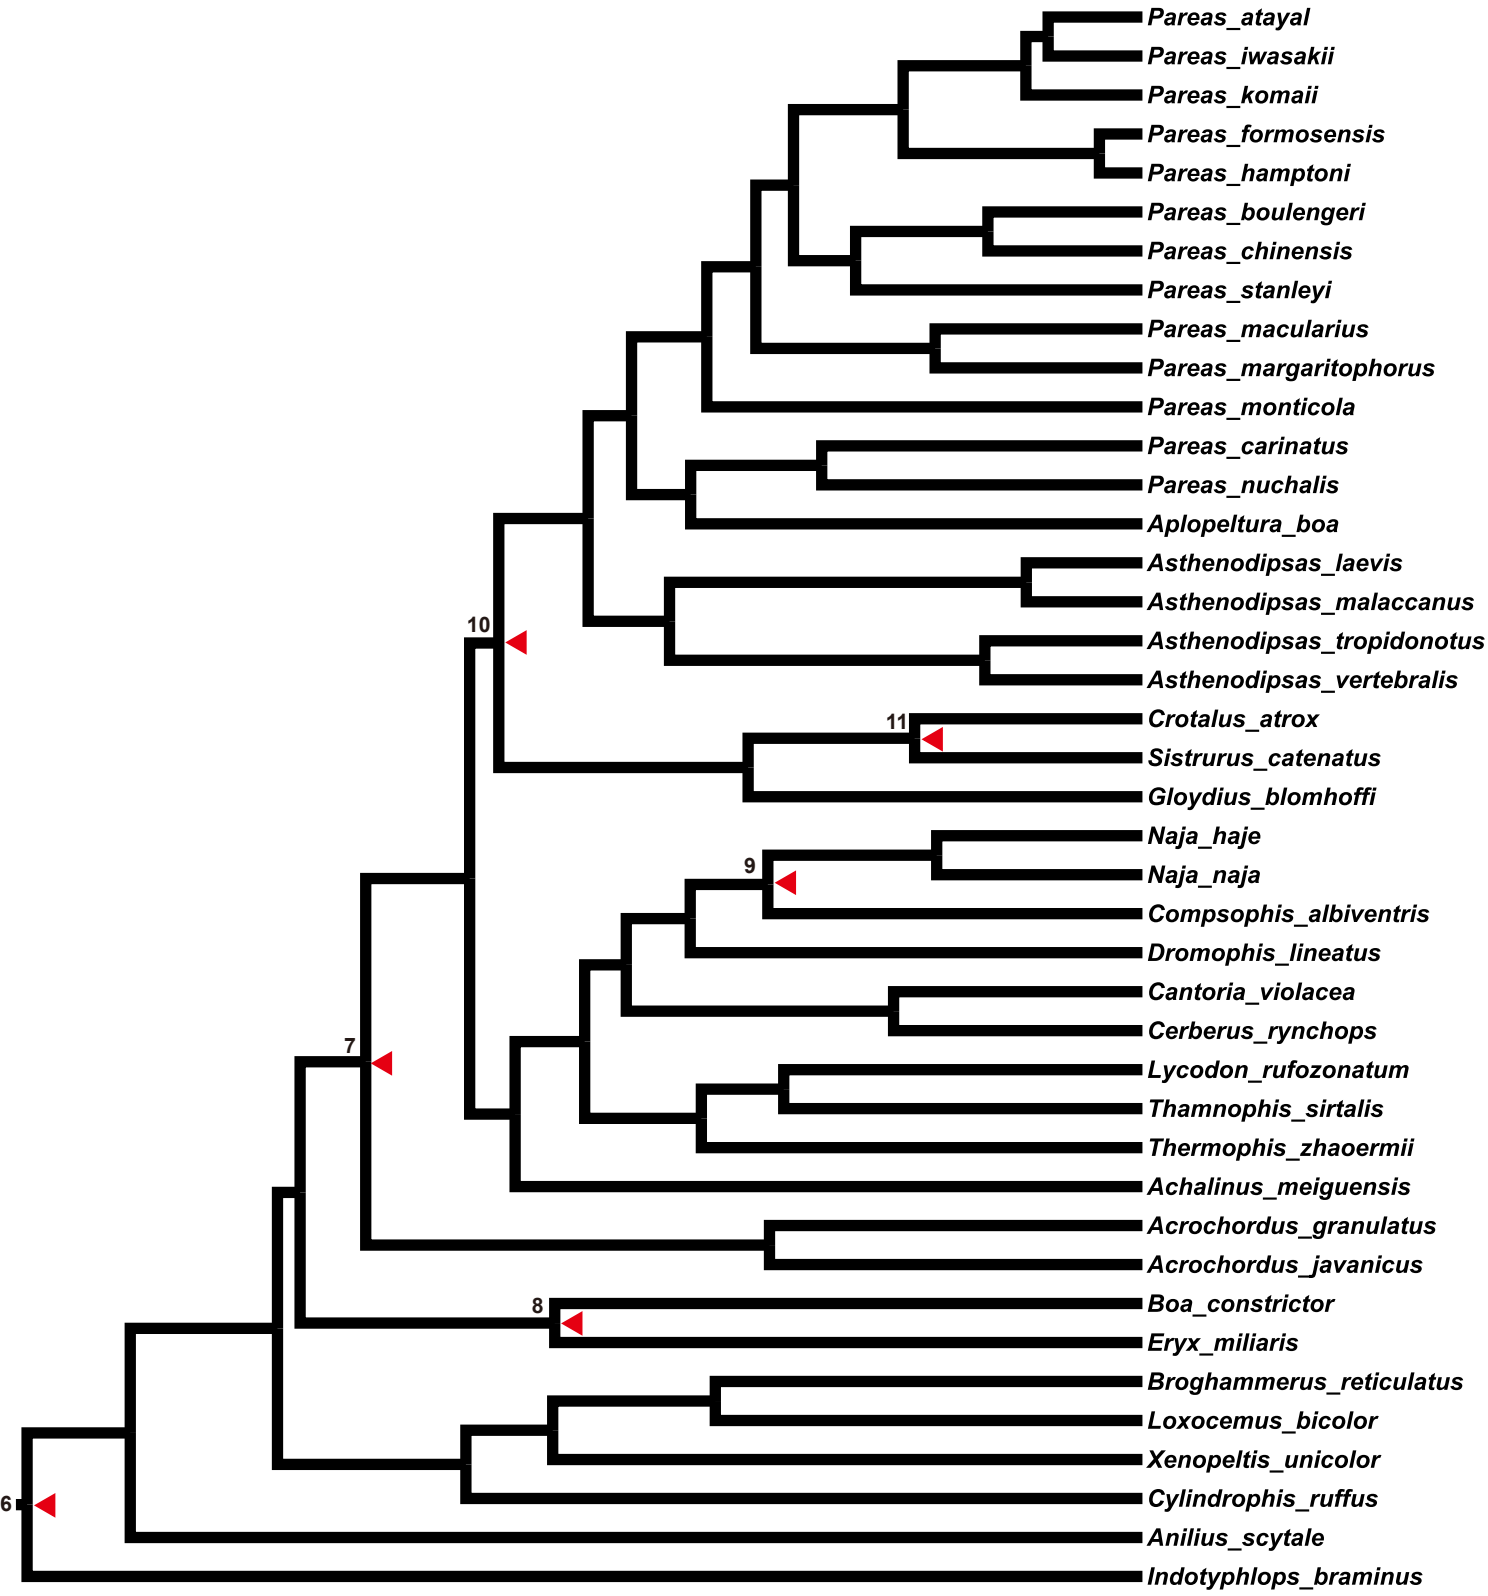

# Ranidae

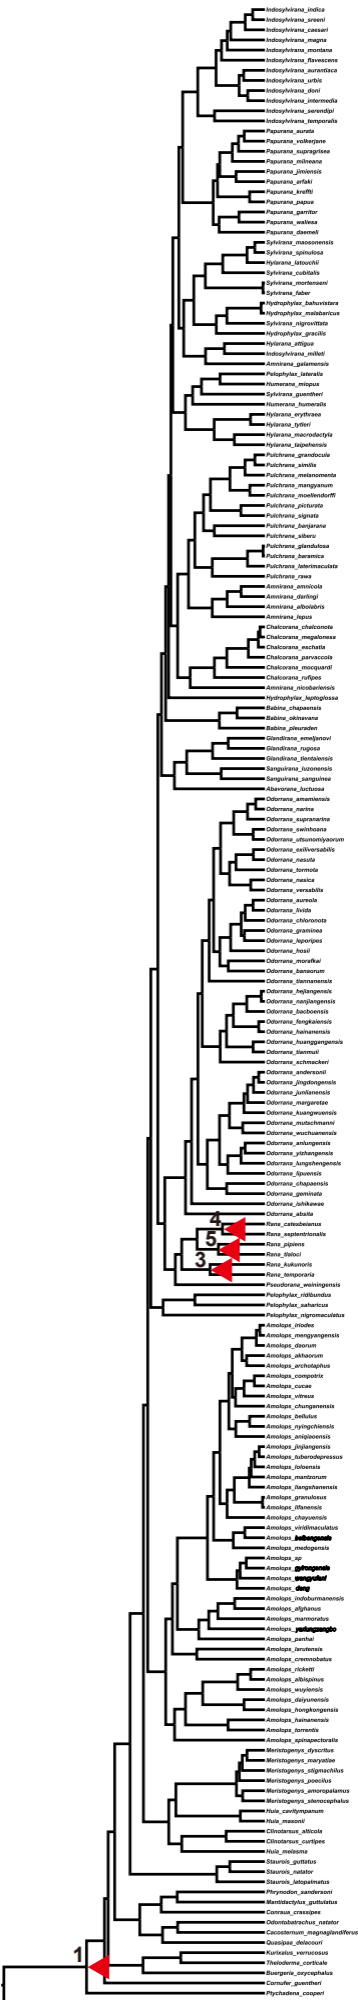



# Rhacophoridae

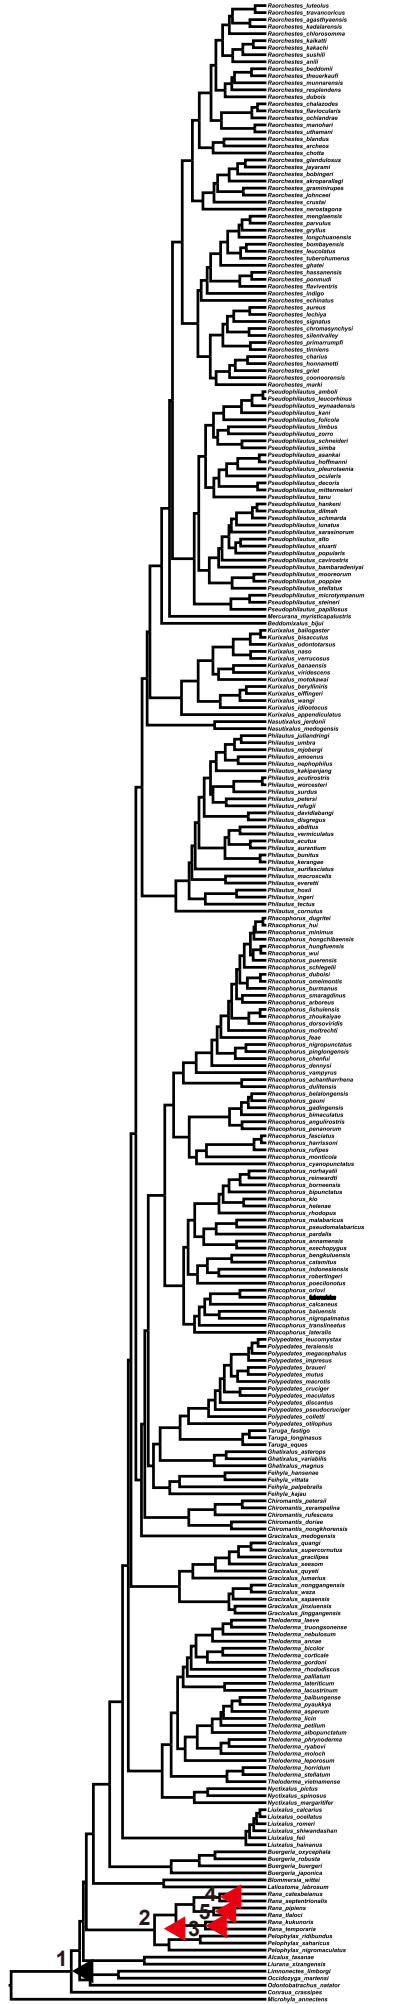

# Scincidae

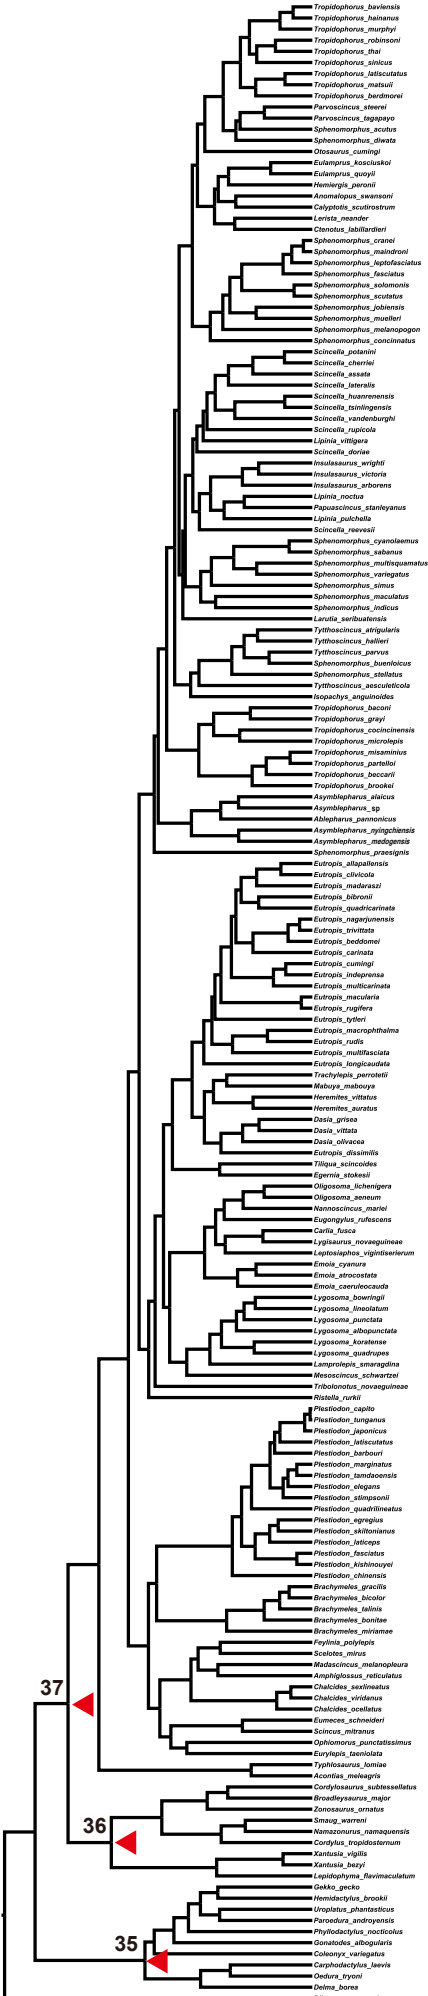

# Viperidae

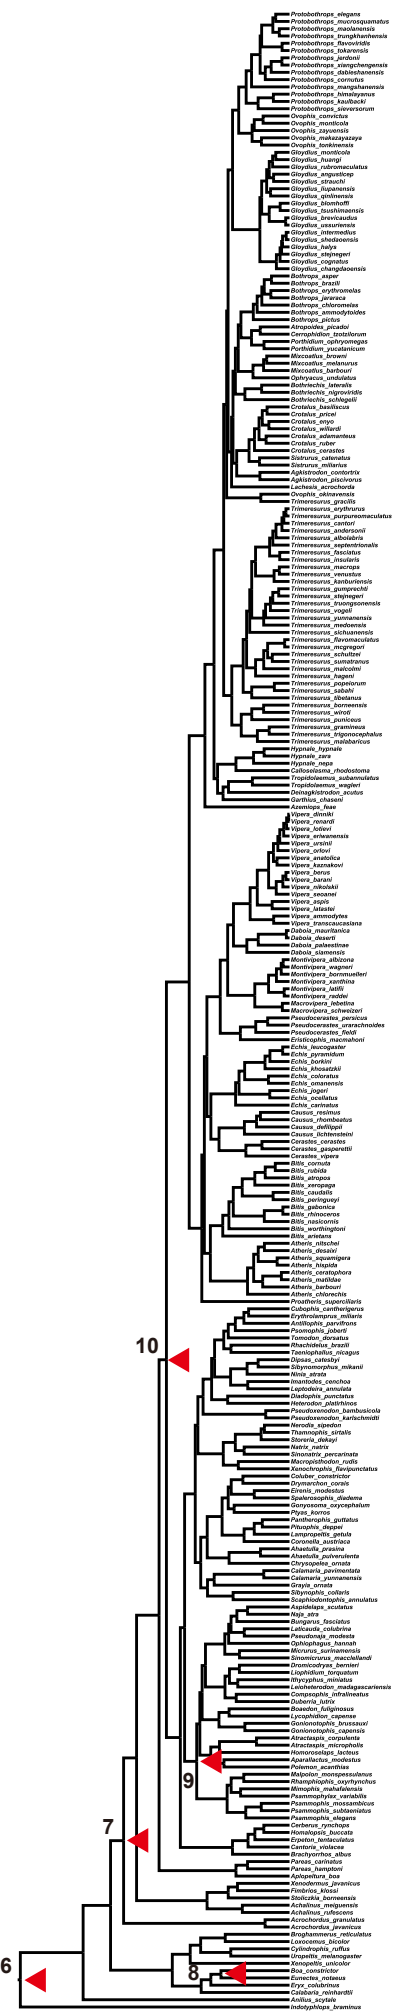

**Data S7.**

Origination, peaks and inflection points detected of MDivE and MDisE curves from 1,000 bootstrap pseudoreplicates.

| <i>In situ</i> diversification | Bootstrap (BS) | Origination time<br>(Ma) | Time of the peak<br>(Ma) | Inflection point 1<br>(Ma) | Inflection point 2<br>(Ma) |
|--------------------------------|----------------|--------------------------|--------------------------|----------------------------|----------------------------|
|                                | BS1            | 67                       | 14                       | 11                         | 28                         |
|                                | BS2            | 67                       | 14                       | 11                         | 24                         |
|                                | BS3            | 67                       | 14                       | 11                         | 35                         |
|                                | BS4            | 67                       | 11                       | 35                         | 56                         |
|                                | BS5            | 67                       | 11                       | 35                         | 56                         |
|                                | BS6            | 67                       | 11                       | 11                         | 35                         |
|                                | BS7            | 57                       | 11                       | 35                         | 51                         |
|                                | BS8            | 57                       | 11                       | 31                         | 56                         |
|                                | BS9            | 57                       | 11                       | 27                         | 55                         |
|                                | BS10           | 67                       | 11                       | 11                         | 31                         |
|                                | BS11           | 67                       | 14                       | 11                         | 28                         |
|                                | BS12           | 67                       | 14                       | 35                         | 56                         |
|                                | BS13           | 67                       | 14                       | 35                         | 51                         |
|                                | BS14           | 67                       | 14                       | 24                         | 56                         |
|                                | BS15           | 67                       | 14                       | 31                         | 56                         |
|                                | BS16           | 67                       | 14                       | 35                         | 56                         |
|                                | BS17           | 67                       | 14                       | 11                         | 29                         |
|                                | BS18           | 67                       | 14                       | 11                         | 43                         |
|                                | BS19           | 57                       | 14                       | 28                         | 55                         |
|                                | BS20           | 67                       | 14                       | 35                         | 56                         |
|                                | BS21           | 67                       | 14                       | 35                         | 56                         |
|                                | BS22           | 57                       | 14                       | 11                         | 31                         |
|                                | BS23           | 57                       | 11                       | 27                         | 52                         |
|                                | BS24           | 67                       | 11                       | 27                         | 55                         |
|                                | BS25           | 67                       | 11                       | 31                         | 54                         |
|                                | BS26           | 67                       | 11                       | 31                         | 51                         |
|                                | BS27           | 67                       | 11                       | 35                         | 56                         |
|                                | BS28           | 67                       | 11                       | 35                         | 54                         |
|                                | BS29           | 67                       | 11                       | 27                         | 51                         |
|                                | BS30           | 67                       | 11                       | 30                         | 54                         |
|                                | BS31           | 67                       | 11                       | 11                         | 35                         |
|                                | BS32           | 67                       | 11                       | 35                         | 56                         |
|                                | BS33           | 67                       | 11                       | 28                         | 51                         |
|                                | BS34           | 57                       | 11                       | 35                         | 51                         |
|                                | BS35           | 67                       | 11                       | 28                         | 55                         |
|                                | BS36           | 57                       | 11                       | 35                         | 56                         |
|                                | BS37           | 67                       | 11                       | 29                         | 46                         |
|                                | BS38           | 67                       | 11                       | 35                         | 56                         |

|      |    |    |    |    |
|------|----|----|----|----|
| BS39 | 67 | 11 | 11 | 35 |
| BS40 | 67 | 11 | 11 | 35 |
| BS41 | 67 | 11 | 11 | 35 |
| BS42 | 67 | 11 | 35 | 56 |
| BS43 | 67 | 11 | 28 | 55 |
| BS44 | 67 | 11 | 27 | 51 |
| BS45 | 67 | 11 | 28 | 51 |
| BS46 | 67 | 11 | 35 | 56 |
| BS47 | 67 | 11 | 27 | 51 |
| BS48 | 67 | 11 | 27 | 55 |
| BS49 | 67 | 11 | 27 | 51 |
| BS50 | 57 | 11 | 26 | 51 |
| BS51 | 67 | 11 | 28 | 51 |
| BS52 | 67 | 11 | 11 | 28 |
| BS53 | 67 | 11 | 28 | 51 |
| BS54 | 67 | 11 | 35 | 56 |
| BS55 | 67 | 11 | 31 | 54 |
| BS56 | 57 | 11 | 27 | 55 |
| BS57 | 67 | 11 | 21 | 51 |
| BS58 | 67 | 11 | 35 | 56 |
| BS59 | 67 | 11 | 26 | 43 |
| BS60 | 67 | 11 | 27 | 52 |
| BS61 | 57 | 14 | 11 | 28 |
| BS62 | 67 | 14 | 27 | 55 |
| BS63 | 67 | 14 | 27 | 52 |
| BS64 | 57 | 14 | 27 | 55 |
| BS65 | 57 | 14 | 27 | 51 |
| BS66 | 67 | 14 | 27 | 51 |
| BS67 | 54 | 14 | 35 | 56 |
| BS68 | 67 | 14 | 27 | 51 |
| BS69 | 57 | 14 | 28 | 46 |
| BS70 | 67 | 14 | 11 | 27 |
| BS71 | 67 | 14 | 25 | 43 |
| BS72 | 67 | 14 | 27 | 51 |
| BS73 | 67 | 14 | 27 | 55 |
| BS74 | 67 | 14 | 11 | 35 |
| BS75 | 57 | 14 | 27 | 51 |
| BS76 | 57 | 14 | 11 | 28 |
| BS77 | 67 | 14 | 27 | 55 |
| BS78 | 67 | 14 | 35 | 56 |

|       |    |    |    |    |
|-------|----|----|----|----|
| BS79  | 67 | 14 | 11 | 29 |
| BS80  | 57 | 14 | 11 | 35 |
| BS81  | 67 | 14 | 28 | 51 |
| BS82  | 67 | 14 | 31 | 54 |
| BS83  | 57 | 14 | 25 | 35 |
| BS84  | 67 | 14 | 30 | 51 |
| BS85  | 67 | 14 | 11 | 27 |
| BS86  | 57 | 14 | 28 | 55 |
| BS87  | 67 | 14 | 31 | 54 |
| BS88  | 67 | 14 | 23 | 51 |
| BS89  | 67 | 14 | 24 | 51 |
| BS90  | 57 | 14 | 11 | 35 |
| BS91  | 54 | 14 | 31 | 54 |
| BS92  | 54 | 14 | 28 | 51 |
| BS93  | 57 | 14 | 27 | 55 |
| BS94  | 67 | 14 | 35 | 56 |
| BS95  | 67 | 14 | 11 | 27 |
| BS96  | 67 | 14 | 11 | 28 |
| BS97  | 54 | 14 | 28 | 55 |
| BS98  | 67 | 14 | 19 | 31 |
| BS99  | 67 | 14 | 31 | 56 |
| BS100 | 54 | 14 | 21 | 51 |
| BS101 | 54 | 14 | 28 | 56 |
| BS102 | 57 | 14 | 24 | 56 |
| BS103 | 67 | 14 | 27 | 51 |
| BS104 | 67 | 14 | 35 | 51 |
| BS105 | 57 | 14 | 35 | 51 |
| BS106 | 67 | 14 | 35 | 51 |
| BS107 | 67 | 14 | 35 | 56 |
| BS108 | 67 | 14 | 27 | 55 |
| BS109 | 67 | 14 | 35 | 51 |
| BS110 | 67 | 14 | 27 | 55 |
| BS111 | 67 | 14 | 24 | 54 |
| BS112 | 57 | 14 | 27 | 51 |
| BS113 | 54 | 14 | 23 | 45 |
| BS114 | 67 | 14 | 25 | 35 |
| BS115 | 67 | 14 | 27 | 55 |
| BS116 | 67 | 14 | 35 | 56 |
| BS117 | 67 | 14 | 35 | 51 |
| BS118 | 67 | 14 | 28 | 51 |

|       |    |    |    |    |
|-------|----|----|----|----|
| BS119 | 67 | 14 | 28 | 51 |
| BS120 | 57 | 14 | 24 | 54 |
| BS121 | 67 | 14 | 28 | 55 |
| BS122 | 67 | 14 | 27 | 51 |
| BS123 | 67 | 14 | 24 | 54 |
| BS124 | 57 | 14 | 27 | 52 |
| BS125 | 67 | 14 | 28 | 55 |
| BS126 | 67 | 14 | 35 | 51 |
| BS127 | 67 | 14 | 28 | 55 |
| BS128 | 67 | 14 | 27 | 55 |
| BS129 | 57 | 14 | 24 | 54 |
| BS130 | 67 | 14 | 20 | 35 |
| BS131 | 67 | 14 | 28 | 51 |
| BS132 | 67 | 14 | 27 | 55 |
| BS133 | 67 | 14 | 27 | 55 |
| BS134 | 67 | 14 | 35 | 51 |
| BS135 | 57 | 14 | 35 | 56 |
| BS136 | 67 | 14 | 31 | 54 |
| BS137 | 67 | 14 | 27 | 54 |
| BS138 | 67 | 14 | 27 | 52 |
| BS139 | 67 | 14 | 35 | 56 |
| BS140 | 67 | 14 | 20 | 43 |
| BS141 | 67 | 14 | 27 | 52 |
| BS142 | 57 | 14 | 35 | 54 |
| BS143 | 67 | 14 | 35 | 56 |
| BS144 | 67 | 14 | 28 | 51 |
| BS145 | 67 | 14 | 11 | 35 |
| BS146 | 67 | 14 | 11 | 27 |
| BS147 | 67 | 14 | 25 | 35 |
| BS148 | 67 | 14 | 35 | 56 |
| BS149 | 67 | 14 | 35 | 56 |
| BS150 | 67 | 14 | 31 | 54 |
| BS151 | 67 | 14 | 27 | 55 |
| BS152 | 67 | 14 | 27 | 51 |
| BS153 | 67 | 14 | 28 | 55 |
| BS154 | 67 | 14 | 27 | 55 |
| BS155 | 67 | 14 | 31 | 54 |
| BS156 | 67 | 14 | 35 | 56 |
| BS157 | 67 | 14 | 27 | 55 |
| BS158 | 57 | 14 | 28 | 51 |



|       |    |    |    |    |
|-------|----|----|----|----|
| BS159 | 57 | 14 | 11 | 35 |
| BS160 | 67 | 14 | 27 | 55 |
| BS161 | 57 | 14 | 35 | 51 |
| BS162 | 67 | 14 | 21 | 57 |
| BS163 | 54 | 14 | 24 | 35 |
| BS164 | 54 | 14 | 11 | 35 |
| BS165 | 67 | 14 | 27 | 51 |
| BS166 | 57 | 14 | 27 | 52 |
| BS167 | 57 | 14 | 31 | 54 |
| BS168 | 67 | 14 | 11 | 28 |
| BS169 | 67 | 14 | 11 | 35 |
| BS170 | 67 | 14 | 27 | 51 |
| BS171 | 67 | 14 | 27 | 55 |
| BS172 | 67 | 14 | 23 | 51 |
| BS173 | 54 | 14 | 27 | 55 |
| BS174 | 54 | 14 | 11 | 35 |
| BS175 | 67 | 14 | 35 | 56 |
| BS176 | 57 | 14 | 20 | 42 |
| BS177 | 54 | 14 | 23 | 51 |
| BS178 | 67 | 14 | 27 | 55 |
| BS179 | 54 | 14 | 11 | 35 |
| BS180 | 67 | 14 | 27 | 51 |
| BS181 | 54 | 14 | 35 | 54 |
| BS182 | 67 | 14 | 28 | 55 |
| BS183 | 67 | 14 | 28 | 51 |
| BS184 | 67 | 14 | 35 | 45 |
| BS185 | 67 | 14 | 24 | 54 |
| BS186 | 67 | 14 | 28 | 51 |
| BS187 | 67 | 14 | 28 | 55 |
| BS188 | 67 | 14 | 11 | 46 |
| BS189 | 67 | 14 | 28 | 54 |
| BS190 | 67 | 14 | 27 | 52 |
| BS191 | 67 | 14 | 35 | 54 |
| BS192 | 67 | 14 | 27 | 55 |
| BS193 | 67 | 14 | 11 | 35 |
| BS194 | 67 | 14 | 27 | 52 |
| BS195 | 67 | 14 | 27 | 51 |
| BS196 | 57 | 14 | 27 | 51 |
| BS197 | 67 | 14 | 27 | 55 |
| BS198 | 67 | 14 | 28 | 55 |

|       |    |    |    |    |
|-------|----|----|----|----|
| BS199 | 67 | 14 | 28 | 47 |
| BS200 | 67 | 14 | 35 | 54 |
| BS201 | 67 | 14 | 27 | 55 |
| BS202 | 67 | 14 | 28 | 51 |
| BS203 | 67 | 14 | 27 | 51 |
| BS204 | 57 | 14 | 28 | 51 |
| BS205 | 67 | 14 | 35 | 56 |
| BS206 | 57 | 14 | 27 | 52 |
| BS207 | 67 | 14 | 11 | 30 |
| BS208 | 67 | 14 | 11 | 27 |
| BS209 | 67 | 14 | 24 | 54 |
| BS210 | 67 | 14 | 28 | 54 |
| BS211 | 67 | 14 | 35 | 54 |
| BS212 | 57 | 14 | 30 | 51 |
| BS213 | 67 | 14 | 27 | 55 |
| BS214 | 67 | 14 | 27 | 55 |
| BS215 | 67 | 14 | 35 | 56 |
| BS216 | 67 | 14 | 27 | 52 |
| BS217 | 67 | 14 | 35 | 54 |
| BS218 | 67 | 14 | 28 | 55 |
| BS219 | 67 | 14 | 27 | 51 |
| BS220 | 67 | 14 | 35 | 56 |
| BS221 | 57 | 14 | 11 | 30 |
| BS222 | 57 | 14 | 35 | 54 |
| BS223 | 67 | 14 | 21 | 54 |
| BS224 | 67 | 14 | 31 | 51 |
| BS225 | 67 | 14 | 24 | 51 |
| BS226 | 67 | 14 | 35 | 54 |
| BS227 | 67 | 14 | 27 | 51 |
| BS228 | 67 | 14 | 27 | 52 |
| BS229 | 54 | 14 | 35 | 56 |
| BS230 | 67 | 14 | 27 | 51 |
| BS231 | 57 | 14 | 24 | 54 |
| BS232 | 67 | 14 | 27 | 51 |
| BS233 | 67 | 14 | 35 | 56 |
| BS234 | 67 | 14 | 24 | 42 |
| BS235 | 67 | 14 | 27 | 55 |
| BS236 | 67 | 14 | 27 | 56 |
| BS237 | 54 | 14 | 27 | 41 |
| BS238 | 67 | 14 | 35 | 56 |

|       |    |    |    |    |
|-------|----|----|----|----|
| BS239 | 67 | 14 | 28 | 55 |
| BS240 | 57 | 14 | 27 | 38 |
| BS241 | 67 | 14 | 27 | 55 |
| BS242 | 67 | 14 | 27 | 55 |
| BS243 | 67 | 14 | 27 | 51 |
| BS244 | 54 | 14 | 24 | 54 |
| BS245 | 67 | 14 | 27 | 55 |
| BS246 | 57 | 14 | 27 | 51 |
| BS247 | 67 | 14 | 35 | 56 |
| BS248 | 57 | 14 | 35 | 56 |
| BS249 | 57 | 14 | 28 | 51 |
| BS250 | 67 | 14 | 27 | 55 |
| BS251 | 67 | 14 | 35 | 56 |
| BS252 | 57 | 14 | 34 | 51 |
| BS253 | 67 | 14 | 11 | 35 |
| BS254 | 67 | 14 | 25 | 35 |
| BS255 | 67 | 14 | 27 | 54 |
| BS256 | 67 | 14 | 28 | 55 |
| BS257 | 54 | 14 | 24 | 54 |
| BS258 | 67 | 14 | 28 | 55 |
| BS259 | 67 | 14 | 27 | 55 |
| BS260 | 67 | 14 | 25 | 35 |
| BS261 | 67 | 14 | 31 | 54 |
| BS262 | 67 | 14 | 11 | 35 |
| BS263 | 67 | 14 | 11 | 35 |
| BS264 | 57 | 14 | 31 | 54 |
| BS265 | 67 | 14 | 21 | 56 |
| BS266 | 67 | 14 | 35 | 54 |
| BS267 | 67 | 14 | 29 | 55 |
| BS268 | 57 | 14 | 35 | 51 |
| BS269 | 67 | 14 | 35 | 56 |
| BS270 | 67 | 14 | 27 | 55 |
| BS271 | 57 | 14 | 23 | 55 |
| BS272 | 67 | 14 | 35 | 56 |
| BS273 | 67 | 14 | 35 | 51 |
| BS274 | 67 | 14 | 27 | 54 |
| BS275 | 67 | 14 | 24 | 54 |
| BS276 | 67 | 14 | 27 | 55 |
| BS277 | 67 | 14 | 27 | 51 |
| BS278 | 67 | 14 | 17 | 53 |

|       |    |    |    |    |
|-------|----|----|----|----|
| BS279 | 67 | 14 | 35 | 56 |
| BS280 | 67 | 14 | 24 | 54 |
| BS281 | 54 | 14 | 35 | 56 |
| BS282 | 57 | 14 | 11 | 35 |
| BS283 | 67 | 14 | 24 | 54 |
| BS284 | 67 | 14 | 11 | 35 |
| BS285 | 67 | 14 | 24 | 54 |
| BS286 | 54 | 14 | 27 | 51 |
| BS287 | 67 | 14 | 25 | 35 |
| BS288 | 67 | 14 | 27 | 55 |
| BS289 | 57 | 14 | 27 | 51 |
| BS290 | 67 | 14 | 27 | 55 |
| BS291 | 54 | 14 | 24 | 42 |
| BS292 | 57 | 14 | 11 | 35 |
| BS293 | 67 | 14 | 28 | 46 |
| BS294 | 67 | 14 | 11 | 27 |
| BS295 | 67 | 14 | 28 | 55 |
| BS296 | 67 | 14 | 35 | 54 |
| BS297 | 67 | 14 | 27 | 52 |
| BS298 | 67 | 14 | 35 | 56 |
| BS299 | 67 | 14 | 11 | 30 |
| BS300 | 67 | 14 | 27 | 51 |
| BS301 | 57 | 14 | 34 | 51 |
| BS302 | 67 | 14 | 24 | 56 |
| BS303 | 67 | 14 | 28 | 51 |
| BS304 | 67 | 14 | 31 | 54 |
| BS305 | 67 | 14 | 21 | 51 |
| BS306 | 67 | 14 | 27 | 51 |
| BS307 | 57 | 14 | 27 | 55 |
| BS308 | 57 | 14 | 25 | 35 |
| BS309 | 67 | 14 | 27 | 51 |
| BS310 | 67 | 14 | 27 | 52 |
| BS311 | 67 | 14 | 35 | 51 |
| BS312 | 57 | 14 | 12 | 28 |
| BS313 | 67 | 14 | 28 | 54 |
| BS314 | 67 | 14 | 27 | 58 |
| BS315 | 67 | 14 | 27 | 55 |
| BS316 | 67 | 14 | 28 | 51 |
| BS317 | 67 | 14 | 27 | 51 |
| BS318 | 54 | 14 | 27 | 52 |

|       |    |    |    |    |
|-------|----|----|----|----|
| BS319 | 67 | 14 | 27 | 54 |
| BS320 | 67 | 14 | 35 | 56 |
| BS321 | 67 | 14 | 35 | 56 |
| BS322 | 67 | 14 | 35 | 56 |
| BS323 | 67 | 14 | 31 | 54 |
| BS324 | 67 | 14 | 11 | 27 |
| BS325 | 67 | 14 | 35 | 54 |
| BS326 | 67 | 14 | 11 | 35 |
| BS327 | 67 | 14 | 27 | 51 |
| BS328 | 57 | 14 | 28 | 51 |
| BS329 | 57 | 14 | 13 | 35 |
| BS330 | 67 | 14 | 11 | 30 |
| BS331 | 67 | 14 | 31 | 54 |
| BS332 | 57 | 14 | 23 | 51 |
| BS333 | 67 | 14 | 11 | 35 |
| BS334 | 67 | 14 | 35 | 51 |
| BS335 | 67 | 14 | 24 | 55 |
| BS336 | 67 | 14 | 27 | 51 |
| BS337 | 67 | 14 | 35 | 51 |
| BS338 | 67 | 14 | 27 | 55 |
| BS339 | 67 | 14 | 11 | 31 |
| BS340 | 57 | 14 | 35 | 56 |
| BS341 | 67 | 14 | 11 | 27 |
| BS342 | 57 | 14 | 24 | 51 |
| BS343 | 67 | 14 | 24 | 54 |
| BS344 | 67 | 14 | 28 | 51 |
| BS345 | 67 | 14 | 20 | 35 |
| BS346 | 67 | 14 | 11 | 35 |
| BS347 | 67 | 14 | 27 | 51 |
| BS348 | 67 | 14 | 23 | 51 |
| BS349 | 67 | 14 | 35 | 56 |
| BS350 | 67 | 14 | 11 | 35 |
| BS351 | 67 | 14 | 31 | 54 |
| BS352 | 67 | 14 | 35 | 54 |
| BS353 | 67 | 14 | 11 | 40 |
| BS354 | 67 | 14 | 35 | 56 |
| BS355 | 67 | 14 | 23 | 46 |
| BS356 | 67 | 14 | 31 | 51 |
| BS357 | 57 | 14 | 31 | 54 |
| BS358 | 57 | 14 | 24 | 54 |

|       |    |    |    |    |
|-------|----|----|----|----|
| BS359 | 67 | 14 | 28 | 55 |
| BS360 | 67 | 14 | 28 | 55 |
| BS361 | 67 | 14 | 24 | 54 |
| BS362 | 67 | 14 | 28 | 55 |
| BS363 | 67 | 14 | 28 | 55 |
| BS364 | 67 | 14 | 24 | 49 |
| BS365 | 57 | 14 | 11 | 27 |
| BS366 | 67 | 14 | 27 | 51 |
| BS367 | 67 | 14 | 35 | 51 |
| BS368 | 67 | 14 | 28 | 51 |
| BS369 | 67 | 14 | 27 | 55 |
| BS370 | 67 | 14 | 35 | 54 |
| BS371 | 67 | 14 | 35 | 56 |
| BS372 | 54 | 14 | 35 | 51 |
| BS373 | 67 | 14 | 28 | 55 |
| BS374 | 67 | 14 | 11 | 35 |
| BS375 | 67 | 14 | 27 | 52 |
| BS376 | 67 | 14 | 26 | 51 |
| BS377 | 67 | 14 | 35 | 56 |
| BS378 | 57 | 14 | 35 | 56 |
| BS379 | 67 | 14 | 35 | 56 |
| BS380 | 67 | 14 | 27 | 55 |
| BS381 | 57 | 14 | 28 | 51 |
| BS382 | 54 | 14 | 27 | 51 |
| BS383 | 67 | 14 | 27 | 45 |
| BS384 | 57 | 14 | 27 | 51 |
| BS385 | 67 | 14 | 28 | 42 |
| BS386 | 67 | 14 | 27 | 52 |
| BS387 | 67 | 14 | 28 | 51 |
| BS388 | 67 | 14 | 35 | 56 |
| BS389 | 54 | 14 | 27 | 55 |
| BS390 | 67 | 14 | 28 | 55 |
| BS391 | 57 | 14 | 24 | 56 |
| BS392 | 67 | 14 | 35 | 56 |
| BS393 | 54 | 14 | 30 | 54 |
| BS394 | 67 | 14 | 19 | 51 |
| BS395 | 67 | 14 | 22 | 35 |
| BS396 | 67 | 14 | 31 | 54 |
| BS397 | 67 | 14 | 27 | 55 |
| BS398 | 67 | 14 | 28 | 55 |

|       |    |    |    |    |
|-------|----|----|----|----|
| BS399 | 67 | 14 | 35 | 51 |
| BS400 | 67 | 14 | 28 | 55 |
| BS401 | 57 | 14 | 11 | 35 |
| BS402 | 67 | 14 | 28 | 54 |
| BS403 | 57 | 14 | 21 | 51 |
| BS404 | 67 | 14 | 24 | 56 |
| BS405 | 67 | 14 | 11 | 28 |
| BS406 | 67 | 14 | 31 | 56 |
| BS407 | 67 | 14 | 28 | 55 |
| BS408 | 67 | 14 | 35 | 56 |
| BS409 | 67 | 14 | 35 | 51 |
| BS410 | 54 | 14 | 11 | 35 |
| BS411 | 67 | 14 | 35 | 51 |
| BS412 | 67 | 14 | 27 | 55 |
| BS413 | 67 | 14 | 11 | 28 |
| BS414 | 57 | 14 | 11 | 35 |
| BS415 | 67 | 14 | 27 | 55 |
| BS416 | 67 | 14 | 35 | 56 |
| BS417 | 57 | 14 | 28 | 51 |
| BS418 | 57 | 14 | 27 | 52 |
| BS419 | 67 | 14 | 24 | 54 |
| BS420 | 67 | 14 | 28 | 55 |
| BS421 | 67 | 14 | 24 | 54 |
| BS422 | 67 | 14 | 27 | 41 |
| BS423 | 54 | 14 | 23 | 51 |
| BS424 | 67 | 14 | 35 | 51 |
| BS425 | 67 | 14 | 11 | 27 |
| BS426 | 57 | 14 | 35 | 51 |
| BS427 | 57 | 14 | 27 | 55 |
| BS428 | 67 | 14 | 24 | 35 |
| BS429 | 67 | 14 | 31 | 51 |
| BS430 | 57 | 14 | 35 | 54 |
| BS431 | 67 | 14 | 28 | 51 |
| BS432 | 57 | 14 | 35 | 54 |
| BS433 | 67 | 14 | 28 | 51 |
| BS434 | 67 | 14 | 35 | 54 |
| BS435 | 57 | 14 | 27 | 51 |
| BS436 | 67 | 14 | 35 | 51 |
| BS437 | 57 | 14 | 35 | 54 |
| BS438 | 57 | 14 | 28 | 55 |

|       |    |    |    |    |
|-------|----|----|----|----|
| BS439 | 67 | 14 | 28 | 51 |
| BS440 | 67 | 14 | 27 | 51 |
| BS441 | 57 | 14 | 28 | 51 |
| BS442 | 57 | 14 | 28 | 51 |
| BS443 | 67 | 14 | 27 | 56 |
| BS444 | 67 | 14 | 28 | 55 |
| BS445 | 67 | 14 | 27 | 52 |
| BS446 | 67 | 14 | 28 | 55 |
| BS447 | 54 | 14 | 11 | 28 |
| BS448 | 54 | 14 | 35 | 56 |
| BS449 | 67 | 14 | 27 | 55 |
| BS450 | 67 | 14 | 35 | 54 |
| BS451 | 67 | 14 | 35 | 56 |
| BS452 | 67 | 14 | 35 | 51 |
| BS453 | 67 | 14 | 28 | 51 |
| BS454 | 57 | 14 | 35 | 56 |
| BS455 | 57 | 14 | 23 | 51 |
| BS456 | 57 | 14 | 27 | 51 |
| BS457 | 67 | 14 | 11 | 35 |
| BS458 | 57 | 14 | 27 | 55 |
| BS459 | 67 | 14 | 11 | 28 |
| BS460 | 67 | 14 | 11 | 28 |
| BS461 | 57 | 14 | 27 | 55 |
| BS462 | 67 | 14 | 30 | 56 |
| BS463 | 67 | 14 | 35 | 51 |
| BS464 | 67 | 14 | 27 | 51 |
| BS465 | 67 | 14 | 31 | 54 |
| BS466 | 67 | 14 | 25 | 35 |
| BS467 | 67 | 14 | 28 | 55 |
| BS468 | 67 | 14 | 27 | 55 |
| BS469 | 67 | 14 | 28 | 51 |
| BS470 | 67 | 14 | 35 | 56 |
| BS471 | 57 | 14 | 27 | 51 |
| BS472 | 57 | 14 | 28 | 51 |
| BS473 | 67 | 14 | 28 | 51 |
| BS474 | 67 | 14 | 28 | 58 |
| BS475 | 67 | 14 | 35 | 56 |
| BS476 | 67 | 14 | 35 | 56 |
| BS477 | 57 | 14 | 11 | 27 |
| BS478 | 67 | 14 | 35 | 45 |



|       |    |    |    |    |
|-------|----|----|----|----|
| BS479 | 67 | 14 | 28 | 55 |
| BS480 | 67 | 14 | 35 | 56 |
| BS481 | 67 | 14 | 27 | 51 |
| BS482 | 67 | 14 | 28 | 55 |
| BS483 | 67 | 14 | 28 | 51 |
| BS484 | 54 | 14 | 28 | 51 |
| BS485 | 67 | 14 | 11 | 35 |
| BS486 | 57 | 14 | 27 | 51 |
| BS487 | 57 | 14 | 11 | 35 |
| BS488 | 67 | 14 | 24 | 51 |
| BS489 | 67 | 14 | 31 | 51 |
| BS490 | 67 | 14 | 35 | 56 |
| BS491 | 57 | 14 | 28 | 55 |
| BS492 | 67 | 14 | 27 | 55 |
| BS493 | 67 | 14 | 35 | 56 |
| BS494 | 67 | 14 | 35 | 56 |
| BS495 | 57 | 14 | 11 | 35 |
| BS496 | 67 | 14 | 28 | 55 |
| BS497 | 67 | 14 | 28 | 55 |
| BS498 | 54 | 14 | 11 | 28 |
| BS499 | 67 | 14 | 27 | 55 |
| BS500 | 67 | 14 | 35 | 56 |
| BS501 | 67 | 14 | 27 | 55 |
| BS502 | 67 | 14 | 11 | 28 |
| BS503 | 67 | 14 | 27 | 55 |
| BS504 | 67 | 14 | 34 | 51 |
| BS505 | 67 | 14 | 35 | 51 |
| BS506 | 67 | 14 | 26 | 43 |
| BS507 | 54 | 14 | 28 | 51 |
| BS508 | 54 | 14 | 27 | 55 |
| BS509 | 67 | 14 | 27 | 51 |
| BS510 | 67 | 14 | 23 | 43 |
| BS511 | 57 | 14 | 11 | 27 |
| BS512 | 67 | 14 | 24 | 56 |
| BS513 | 67 | 14 | 35 | 51 |
| BS514 | 57 | 14 | 36 | 55 |
| BS515 | 67 | 14 | 27 | 51 |
| BS516 | 67 | 14 | 27 | 51 |
| BS517 | 67 | 14 | 27 | 51 |
| BS518 | 67 | 14 | 27 | 51 |

|       |    |    |    |    |
|-------|----|----|----|----|
| BS519 | 67 | 14 | 35 | 51 |
| BS520 | 67 | 14 | 11 | 35 |
| BS521 | 67 | 14 | 28 | 55 |
| BS522 | 67 | 14 | 35 | 56 |
| BS523 | 67 | 14 | 35 | 51 |
| BS524 | 67 | 14 | 28 | 42 |
| BS525 | 67 | 14 | 11 | 35 |
| BS526 | 57 | 14 | 11 | 35 |
| BS527 | 57 | 14 | 31 | 51 |
| BS528 | 67 | 14 | 35 | 56 |
| BS529 | 54 | 14 | 28 | 55 |
| BS530 | 67 | 14 | 28 | 51 |
| BS531 | 67 | 14 | 27 | 52 |
| BS532 | 67 | 14 | 11 | 35 |
| BS533 | 57 | 14 | 35 | 56 |
| BS534 | 67 | 14 | 25 | 35 |
| BS535 | 67 | 14 | 35 | 54 |
| BS536 | 67 | 14 | 27 | 55 |
| BS537 | 67 | 14 | 27 | 55 |
| BS538 | 67 | 14 | 11 | 28 |
| BS539 | 57 | 14 | 27 | 55 |
| BS540 | 57 | 14 | 28 | 51 |
| BS541 | 54 | 14 | 27 | 51 |
| BS542 | 57 | 14 | 24 | 42 |
| BS543 | 67 | 14 | 36 | 55 |
| BS544 | 67 | 14 | 24 | 51 |
| BS545 | 67 | 14 | 35 | 56 |
| BS546 | 57 | 14 | 24 | 54 |
| BS547 | 67 | 14 | 27 | 55 |
| BS548 | 67 | 14 | 28 | 51 |
| BS549 | 67 | 14 | 35 | 56 |
| BS550 | 67 | 14 | 35 | 56 |
| BS551 | 67 | 14 | 24 | 56 |
| BS552 | 67 | 14 | 25 | 49 |
| BS553 | 67 | 14 | 28 | 51 |
| BS554 | 67 | 14 | 27 | 55 |
| BS555 | 67 | 14 | 31 | 54 |
| BS556 | 67 | 14 | 35 | 56 |
| BS557 | 52 | 14 | 35 | 56 |
| BS558 | 67 | 14 | 27 | 51 |

|       |    |    |    |    |
|-------|----|----|----|----|
| BS559 | 67 | 14 | 11 | 35 |
| BS560 | 67 | 14 | 11 | 31 |
| BS561 | 67 | 14 | 28 | 51 |
| BS562 | 54 | 14 | 27 | 51 |
| BS563 | 67 | 14 | 27 | 51 |
| BS564 | 57 | 14 | 27 | 51 |
| BS565 | 67 | 14 | 27 | 55 |
| BS566 | 67 | 14 | 25 | 51 |
| BS567 | 57 | 14 | 35 | 54 |
| BS568 | 67 | 14 | 24 | 54 |
| BS569 | 67 | 14 | 24 | 43 |
| BS570 | 67 | 14 | 28 | 55 |
| BS571 | 67 | 14 | 31 | 51 |
| BS572 | 67 | 14 | 18 | 51 |
| BS573 | 67 | 14 | 31 | 56 |
| BS574 | 67 | 14 | 35 | 54 |
| BS575 | 67 | 14 | 29 | 51 |
| BS576 | 67 | 14 | 28 | 55 |
| BS577 | 67 | 14 | 25 | 51 |
| BS578 | 67 | 14 | 35 | 56 |
| BS579 | 67 | 14 | 27 | 51 |
| BS580 | 67 | 14 | 24 | 56 |
| BS581 | 67 | 14 | 20 | 35 |
| BS582 | 57 | 14 | 11 | 28 |
| BS583 | 67 | 14 | 20 | 55 |
| BS584 | 67 | 14 | 31 | 51 |
| BS585 | 67 | 14 | 27 | 51 |
| BS586 | 54 | 14 | 28 | 51 |
| BS587 | 67 | 14 | 20 | 35 |
| BS588 | 57 | 14 | 31 | 54 |
| BS589 | 67 | 14 | 35 | 51 |
| BS590 | 67 | 14 | 24 | 54 |
| BS591 | 67 | 14 | 27 | 51 |
| BS592 | 57 | 14 | 25 | 35 |
| BS593 | 57 | 14 | 27 | 52 |
| BS594 | 67 | 14 | 27 | 55 |
| BS595 | 67 | 14 | 35 | 54 |
| BS596 | 67 | 14 | 35 | 56 |
| BS597 | 67 | 14 | 28 | 55 |
| BS598 | 67 | 14 | 27 | 51 |

|       |    |    |    |    |
|-------|----|----|----|----|
| BS599 | 67 | 14 | 11 | 35 |
| BS600 | 67 | 14 | 35 | 56 |
| BS601 | 67 | 14 | 27 | 55 |
| BS602 | 57 | 14 | 27 | 55 |
| BS603 | 57 | 14 | 20 | 51 |
| BS604 | 67 | 14 | 35 | 56 |
| BS605 | 67 | 14 | 35 | 56 |
| BS606 | 67 | 14 | 11 | 27 |
| BS607 | 67 | 14 | 28 | 51 |
| BS608 | 54 | 14 | 28 | 51 |
| BS609 | 67 | 14 | 35 | 56 |
| BS610 | 67 | 14 | 30 | 54 |
| BS611 | 67 | 14 | 23 | 51 |
| BS612 | 67 | 14 | 27 | 55 |
| BS613 | 57 | 14 | 27 | 55 |
| BS614 | 67 | 14 | 28 | 51 |
| BS615 | 67 | 14 | 35 | 45 |
| BS616 | 57 | 14 | 26 | 55 |
| BS617 | 67 | 14 | 27 | 55 |
| BS618 | 67 | 14 | 28 | 51 |
| BS619 | 67 | 14 | 11 | 27 |
| BS620 | 67 | 14 | 35 | 51 |
| BS621 | 67 | 14 | 27 | 51 |
| BS622 | 67 | 14 | 11 | 31 |
| BS623 | 67 | 14 | 24 | 43 |
| BS624 | 67 | 14 | 35 | 54 |
| BS625 | 67 | 14 | 28 | 51 |
| BS626 | 67 | 14 | 31 | 56 |
| BS627 | 67 | 14 | 35 | 54 |
| BS628 | 67 | 14 | 11 | 27 |
| BS629 | 67 | 14 | 25 | 35 |
| BS630 | 67 | 14 | 23 | 45 |
| BS631 | 57 | 13 | 27 | 51 |
| BS632 | 67 | 13 | 26 | 43 |
| BS633 | 67 | 13 | 24 | 51 |
| BS634 | 67 | 13 | 28 | 51 |
| BS635 | 67 | 13 | 27 | 56 |
| BS636 | 67 | 13 | 35 | 54 |
| BS637 | 67 | 13 | 35 | 51 |
| BS638 | 67 | 13 | 23 | 51 |

|       |    |    |    |    |
|-------|----|----|----|----|
| BS639 | 67 | 13 | 28 | 51 |
| BS640 | 67 | 13 | 27 | 55 |
| BS641 | 67 | 13 | 27 | 55 |
| BS642 | 67 | 13 | 27 | 55 |
| BS643 | 67 | 13 | 35 | 56 |
| BS644 | 57 | 13 | 35 | 54 |
| BS645 | 57 | 13 | 24 | 51 |
| BS646 | 67 | 13 | 28 | 55 |
| BS647 | 54 | 13 | 35 | 51 |
| BS648 | 67 | 13 | 27 | 52 |
| BS649 | 67 | 13 | 27 | 58 |
| BS650 | 54 | 13 | 27 | 55 |
| BS651 | 67 | 13 | 28 | 51 |
| BS652 | 67 | 13 | 27 | 55 |
| BS653 | 67 | 13 | 25 | 35 |
| BS654 | 67 | 13 | 35 | 56 |
| BS655 | 67 | 13 | 28 | 51 |
| BS656 | 67 | 13 | 35 | 56 |
| BS657 | 67 | 13 | 35 | 51 |
| BS658 | 67 | 13 | 27 | 55 |
| BS659 | 67 | 13 | 28 | 55 |
| BS660 | 57 | 13 | 25 | 35 |
| BS661 | 67 | 13 | 35 | 56 |
| BS662 | 67 | 13 | 31 | 55 |
| BS663 | 67 | 13 | 28 | 58 |
| BS664 | 67 | 13 | 23 | 42 |
| BS665 | 67 | 13 | 35 | 51 |
| BS666 | 67 | 13 | 11 | 35 |
| BS667 | 67 | 13 | 35 | 56 |
| BS668 | 67 | 13 | 11 | 27 |
| BS669 | 57 | 13 | 25 | 35 |
| BS670 | 67 | 13 | 24 | 54 |
| BS671 | 67 | 13 | 28 | 51 |
| BS672 | 67 | 13 | 35 | 51 |
| BS673 | 67 | 13 | 23 | 43 |
| BS674 | 67 | 13 | 27 | 51 |
| BS675 | 67 | 13 | 35 | 51 |
| BS676 | 67 | 13 | 29 | 55 |
| BS677 | 67 | 13 | 27 | 55 |
| BS678 | 67 | 13 | 24 | 56 |

|       |    |    |    |    |
|-------|----|----|----|----|
| BS679 | 67 | 13 | 27 | 52 |
| BS680 | 67 | 13 | 25 | 35 |
| BS681 | 67 | 13 | 35 | 54 |
| BS682 | 67 | 13 | 38 | 56 |
| BS683 | 54 | 13 | 28 | 55 |
| BS684 | 67 | 13 | 11 | 28 |
| BS685 | 57 | 13 | 25 | 51 |
| BS686 | 67 | 13 | 31 | 51 |
| BS687 | 67 | 13 | 27 | 51 |
| BS688 | 57 | 13 | 35 | 54 |
| BS689 | 67 | 13 | 35 | 56 |
| BS690 | 67 | 13 | 11 | 35 |
| BS691 | 67 | 13 | 35 | 56 |
| BS692 | 67 | 13 | 43 | 54 |
| BS693 | 67 | 13 | 11 | 35 |
| BS694 | 57 | 13 | 25 | 43 |
| BS695 | 57 | 13 | 27 | 55 |
| BS696 | 67 | 13 | 27 | 55 |
| BS697 | 67 | 13 | 35 | 56 |
| BS698 | 57 | 13 | 35 | 51 |
| BS699 | 67 | 13 | 35 | 56 |
| BS700 | 67 | 13 | 27 | 51 |
| BS701 | 57 | 13 | 27 | 55 |
| BS702 | 54 | 13 | 35 | 56 |
| BS703 | 54 | 13 | 27 | 38 |
| BS704 | 67 | 13 | 35 | 56 |
| BS705 | 67 | 13 | 27 | 52 |
| BS706 | 67 | 13 | 28 | 55 |
| BS707 | 67 | 13 | 27 | 55 |
| BS708 | 67 | 13 | 35 | 56 |
| BS709 | 67 | 13 | 28 | 54 |
| BS710 | 57 | 13 | 27 | 55 |
| BS711 | 54 | 13 | 27 | 51 |
| BS712 | 67 | 13 | 11 | 35 |
| BS713 | 67 | 13 | 35 | 51 |
| BS714 | 67 | 13 | 35 | 56 |
| BS715 | 67 | 13 | 11 | 35 |
| BS716 | 67 | 13 | 25 | 35 |
| BS717 | 67 | 13 | 35 | 54 |
| BS718 | 67 | 13 | 25 | 35 |

|       |    |    |    |    |
|-------|----|----|----|----|
| BS719 | 67 | 13 | 35 | 51 |
| BS720 | 67 | 13 | 28 | 51 |
| BS721 | 67 | 13 | 11 | 27 |
| BS722 | 67 | 13 | 11 | 35 |
| BS723 | 67 | 13 | 35 | 56 |
| BS724 | 67 | 13 | 24 | 54 |
| BS725 | 57 | 13 | 25 | 35 |
| BS726 | 67 | 13 | 27 | 55 |
| BS727 | 67 | 13 | 27 | 55 |
| BS728 | 57 | 13 | 27 | 51 |
| BS729 | 67 | 13 | 35 | 51 |
| BS730 | 67 | 13 | 28 | 51 |
| BS731 | 57 | 13 | 35 | 56 |
| BS732 | 67 | 13 | 11 | 27 |
| BS733 | 67 | 13 | 20 | 35 |
| BS734 | 67 | 13 | 30 | 54 |
| BS735 | 54 | 13 | 24 | 54 |
| BS736 | 57 | 13 | 31 | 54 |
| BS737 | 57 | 13 | 35 | 54 |
| BS738 | 67 | 13 | 27 | 51 |
| BS739 | 67 | 13 | 27 | 55 |
| BS740 | 67 | 13 | 11 | 35 |
| BS741 | 57 | 13 | 20 | 42 |
| BS742 | 67 | 13 | 28 | 51 |
| BS743 | 67 | 13 | 31 | 54 |
| BS744 | 67 | 13 | 27 | 51 |
| BS745 | 57 | 13 | 28 | 51 |
| BS746 | 67 | 13 | 27 | 55 |
| BS747 | 67 | 13 | 27 | 58 |
| BS748 | 67 | 13 | 28 | 51 |
| BS749 | 67 | 13 | 27 | 55 |
| BS750 | 54 | 13 | 35 | 56 |
| BS751 | 57 | 13 | 28 | 51 |
| BS752 | 54 | 13 | 23 | 55 |
| BS753 | 67 | 13 | 28 | 55 |
| BS754 | 67 | 13 | 35 | 54 |
| BS755 | 67 | 13 | 35 | 56 |
| BS756 | 67 | 13 | 27 | 51 |
| BS757 | 57 | 13 | 27 | 51 |
| BS758 | 67 | 13 | 35 | 51 |

|       |    |    |    |    |
|-------|----|----|----|----|
| BS759 | 67 | 13 | 29 | 46 |
| BS760 | 67 | 13 | 35 | 56 |
| BS761 | 67 | 13 | 11 | 31 |
| BS762 | 57 | 13 | 35 | 54 |
| BS763 | 67 | 13 | 22 | 35 |
| BS764 | 67 | 13 | 27 | 55 |
| BS765 | 67 | 13 | 28 | 55 |
| BS766 | 67 | 13 | 27 | 55 |
| BS767 | 67 | 13 | 35 | 56 |
| BS768 | 67 | 13 | 11 | 35 |
| BS769 | 67 | 13 | 24 | 56 |
| BS770 | 67 | 13 | 28 | 55 |
| BS771 | 67 | 13 | 28 | 55 |
| BS772 | 67 | 13 | 35 | 51 |
| BS773 | 67 | 13 | 27 | 51 |
| BS774 | 57 | 13 | 26 | 55 |
| BS775 | 67 | 13 | 35 | 56 |
| BS776 | 67 | 13 | 31 | 51 |
| BS777 | 57 | 13 | 27 | 51 |
| BS778 | 67 | 13 | 24 | 56 |
| BS779 | 67 | 13 | 27 | 52 |
| BS780 | 67 | 13 | 11 | 43 |
| BS781 | 67 | 13 | 25 | 43 |
| BS782 | 67 | 13 | 35 | 54 |
| BS783 | 54 | 13 | 25 | 35 |
| BS784 | 67 | 13 | 35 | 54 |
| BS785 | 57 | 13 | 23 | 51 |
| BS786 | 57 | 13 | 27 | 55 |
| BS787 | 67 | 13 | 35 | 51 |
| BS788 | 67 | 13 | 28 | 55 |
| BS789 | 67 | 13 | 24 | 35 |
| BS790 | 54 | 13 | 24 | 35 |
| BS791 | 67 | 13 | 11 | 30 |
| BS792 | 67 | 13 | 35 | 56 |
| BS793 | 54 | 13 | 27 | 51 |
| BS794 | 57 | 13 | 28 | 54 |
| BS795 | 67 | 13 | 11 | 28 |
| BS796 | 57 | 13 | 27 | 55 |
| BS797 | 67 | 13 | 27 | 55 |
| BS798 | 67 | 13 | 28 | 55 |



|       |    |    |    |    |
|-------|----|----|----|----|
| BS799 | 67 | 13 | 28 | 55 |
| BS800 | 67 | 13 | 30 | 51 |
| BS801 | 67 | 13 | 24 | 56 |
| BS802 | 67 | 13 | 11 | 35 |
| BS803 | 67 | 13 | 25 | 43 |
| BS804 | 57 | 13 | 11 | 35 |
| BS805 | 67 | 13 | 28 | 55 |
| BS806 | 67 | 13 | 35 | 56 |
| BS807 | 57 | 13 | 24 | 51 |
| BS808 | 67 | 13 | 24 | 54 |
| BS809 | 67 | 13 | 25 | 35 |
| BS810 | 67 | 13 | 35 | 51 |
| BS811 | 67 | 13 | 35 | 54 |
| BS812 | 67 | 13 | 35 | 51 |
| BS813 | 57 | 13 | 23 | 45 |
| BS814 | 54 | 13 | 28 | 55 |
| BS815 | 67 | 13 | 11 | 27 |
| BS816 | 67 | 13 | 35 | 56 |
| BS817 | 67 | 13 | 27 | 51 |
| BS818 | 67 | 13 | 24 | 35 |
| BS819 | 67 | 13 | 11 | 30 |
| BS820 | 57 | 13 | 35 | 56 |
| BS821 | 67 | 13 | 29 | 55 |
| BS822 | 57 | 13 | 31 | 54 |
| BS823 | 67 | 13 | 23 | 45 |
| BS824 | 57 | 13 | 11 | 35 |
| BS825 | 67 | 13 | 11 | 27 |
| BS826 | 67 | 13 | 35 | 54 |
| BS827 | 67 | 13 | 25 | 35 |
| BS828 | 67 | 13 | 24 | 54 |
| BS829 | 67 | 13 | 27 | 51 |
| BS830 | 67 | 13 | 11 | 35 |
| BS831 | 67 | 13 | 25 | 55 |
| BS832 | 67 | 13 | 19 | 35 |
| BS833 | 67 | 13 | 35 | 54 |
| BS834 | 67 | 13 | 35 | 54 |
| BS835 | 54 | 13 | 27 | 55 |
| BS836 | 67 | 13 | 27 | 55 |
| BS837 | 67 | 13 | 27 | 55 |
| BS838 | 57 | 13 | 28 | 51 |

|       |    |    |    |    |
|-------|----|----|----|----|
| BS839 | 67 | 13 | 11 | 31 |
| BS840 | 57 | 13 | 27 | 52 |
| BS841 | 67 | 13 | 27 | 55 |
| BS842 | 67 | 13 | 35 | 56 |
| BS843 | 67 | 13 | 29 | 43 |
| BS844 | 67 | 13 | 35 | 54 |
| BS845 | 57 | 13 | 35 | 51 |
| BS846 | 67 | 13 | 24 | 56 |
| BS847 | 67 | 13 | 28 | 51 |
| BS848 | 67 | 13 | 11 | 28 |
| BS849 | 67 | 13 | 35 | 56 |
| BS850 | 57 | 13 | 27 | 58 |
| BS851 | 67 | 13 | 28 | 55 |
| BS852 | 67 | 13 | 28 | 55 |
| BS853 | 67 | 13 | 28 | 51 |
| BS854 | 67 | 13 | 35 | 54 |
| BS855 | 54 | 13 | 35 | 56 |
| BS856 | 67 | 13 | 28 | 55 |
| BS857 | 67 | 13 | 35 | 56 |
| BS858 | 67 | 13 | 35 | 51 |
| BS859 | 67 | 13 | 28 | 55 |
| BS860 | 67 | 13 | 11 | 31 |
| BS861 | 67 | 13 | 23 | 55 |
| BS862 | 67 | 13 | 23 | 42 |
| BS863 | 57 | 13 | 27 | 55 |
| BS864 | 67 | 13 | 11 | 35 |
| BS865 | 54 | 13 | 31 | 51 |
| BS866 | 67 | 13 | 28 | 51 |
| BS867 | 67 | 13 | 11 | 28 |
| BS868 | 67 | 13 | 11 | 31 |
| BS869 | 57 | 13 | 35 | 54 |
| BS870 | 67 | 13 | 11 | 28 |
| BS871 | 57 | 13 | 12 | 35 |
| BS872 | 67 | 13 | 28 | 51 |
| BS873 | 57 | 13 | 35 | 56 |
| BS874 | 57 | 13 | 27 | 51 |
| BS875 | 67 | 13 | 37 | 55 |
| BS876 | 57 | 13 | 27 | 55 |
| BS877 | 54 | 13 | 35 | 54 |
| BS878 | 67 | 13 | 25 | 51 |

|       |    |    |    |    |
|-------|----|----|----|----|
| BS879 | 54 | 13 | 25 | 51 |
| BS880 | 67 | 13 | 31 | 51 |
| BS881 | 67 | 13 | 31 | 54 |
| BS882 | 67 | 13 | 31 | 51 |
| BS883 | 67 | 13 | 11 | 27 |
| BS884 | 67 | 13 | 35 | 56 |
| BS885 | 67 | 13 | 11 | 35 |
| BS886 | 67 | 13 | 28 | 55 |
| BS887 | 57 | 13 | 24 | 54 |
| BS888 | 57 | 13 | 11 | 35 |
| BS889 | 54 | 13 | 11 | 27 |
| BS890 | 67 | 13 | 27 | 51 |
| BS891 | 67 | 13 | 11 | 35 |
| BS892 | 67 | 13 | 35 | 56 |
| BS893 | 57 | 13 | 11 | 30 |
| BS894 | 54 | 13 | 25 | 40 |
| BS895 | 67 | 13 | 35 | 56 |
| BS896 | 54 | 13 | 24 | 56 |
| BS897 | 67 | 13 | 27 | 52 |
| BS898 | 54 | 13 | 35 | 56 |
| BS899 | 67 | 13 | 35 | 54 |
| BS900 | 67 | 13 | 27 | 55 |
| BS901 | 67 | 13 | 31 | 51 |
| BS902 | 57 | 13 | 35 | 54 |
| BS903 | 57 | 13 | 35 | 51 |
| BS904 | 67 | 13 | 27 | 45 |
| BS905 | 67 | 13 | 27 | 55 |
| BS906 | 54 | 13 | 27 | 51 |
| BS907 | 67 | 13 | 27 | 51 |
| BS908 | 57 | 13 | 28 | 54 |
| BS909 | 67 | 13 | 11 | 27 |
| BS910 | 67 | 13 | 27 | 51 |
| BS911 | 54 | 13 | 24 | 54 |
| BS912 | 54 | 13 | 28 | 55 |
| BS913 | 54 | 13 | 24 | 55 |
| BS914 | 67 | 13 | 28 | 55 |
| BS915 | 67 | 13 | 35 | 54 |
| BS916 | 67 | 13 | 35 | 56 |
| BS917 | 67 | 13 | 27 | 55 |
| BS918 | 67 | 13 | 11 | 27 |

|       |    |    |    |    |
|-------|----|----|----|----|
| BS919 | 67 | 13 | 11 | 35 |
| BS920 | 67 | 13 | 35 | 51 |
| BS921 | 67 | 13 | 24 | 56 |
| BS922 | 54 | 13 | 28 | 51 |
| BS923 | 67 | 13 | 28 | 51 |
| BS924 | 67 | 13 | 24 | 56 |
| BS925 | 54 | 13 | 27 | 55 |
| BS926 | 67 | 13 | 35 | 56 |
| BS927 | 57 | 13 | 35 | 56 |
| BS928 | 57 | 13 | 31 | 51 |
| BS929 | 67 | 13 | 11 | 28 |
| BS930 | 67 | 13 | 35 | 51 |
| BS931 | 67 | 13 | 31 | 54 |
| BS932 | 57 | 13 | 26 | 43 |
| BS933 | 67 | 13 | 35 | 51 |
| BS934 | 67 | 13 | 28 | 51 |
| BS935 | 54 | 13 | 35 | 54 |
| BS936 | 67 | 13 | 35 | 56 |
| BS937 | 67 | 13 | 28 | 55 |
| BS938 | 57 | 13 | 25 | 35 |
| BS939 | 67 | 13 | 35 | 56 |
| BS940 | 67 | 13 | 28 | 51 |
| BS941 | 67 | 13 | 27 | 51 |
| BS942 | 57 | 13 | 11 | 30 |
| BS943 | 67 | 13 | 35 | 56 |
| BS944 | 67 | 13 | 27 | 55 |
| BS945 | 57 | 13 | 28 | 51 |
| BS946 | 67 | 13 | 31 | 51 |
| BS947 | 57 | 13 | 27 | 52 |
| BS948 | 67 | 13 | 35 | 51 |
| BS949 | 67 | 13 | 27 | 52 |
| BS950 | 67 | 13 | 27 | 55 |
| BS951 | 67 | 13 | 30 | 54 |
| BS952 | 67 | 13 | 18 | 43 |
| BS953 | 67 | 13 | 35 | 54 |
| BS954 | 67 | 13 | 20 | 43 |
| BS955 | 67 | 13 | 27 | 51 |
| BS956 | 67 | 13 | 27 | 55 |
| BS957 | 57 | 13 | 11 | 35 |
| BS958 | 67 | 13 | 24 | 54 |

|       |    |    |    |    |
|-------|----|----|----|----|
| BS959 | 57 | 13 | 28 | 54 |
| BS960 | 67 | 13 | 27 | 58 |
| BS961 | 67 | 13 | 41 | 51 |
| BS962 | 67 | 13 | 28 | 51 |
| BS963 | 67 | 13 | 35 | 51 |
| BS964 | 67 | 13 | 24 | 35 |
| BS965 | 67 | 13 | 24 | 51 |
| BS966 | 67 | 13 | 25 | 35 |
| BS967 | 54 | 13 | 35 | 56 |
| BS968 | 57 | 13 | 28 | 51 |
| BS969 | 57 | 13 | 30 | 56 |
| BS970 | 67 | 13 | 28 | 55 |
| BS971 | 67 | 13 | 11 | 35 |
| BS972 | 67 | 13 | 27 | 51 |
| BS973 | 57 | 13 | 28 | 51 |
| BS974 | 67 | 13 | 28 | 55 |
| BS975 | 67 | 13 | 20 | 35 |
| BS976 | 67 | 13 | 27 | 51 |
| BS977 | 67 | 13 | 27 | 51 |
| BS978 | 67 | 13 | 27 | 52 |
| BS979 | 67 | 13 | 11 | 27 |
| BS980 | 57 | 13 | 35 | 56 |
| BS981 | 57 | 13 | 28 | 51 |
| BS982 | 67 | 13 | 27 | 52 |
| BS983 | 67 | 13 | 35 | 56 |
| BS984 | 57 | 13 | 28 | 51 |
| BS985 | 67 | 13 | 28 | 55 |
| BS986 | 67 | 13 | 27 | 45 |
| BS987 | 67 | 13 | 27 | 51 |
| BS988 | 67 | 13 | 35 | 56 |
| BS989 | 67 | 13 | 27 | 55 |
| BS990 | 67 | 13 | 24 | 56 |
| BS991 | 67 | 13 | 11 | 35 |
| BS992 | 57 | 13 | 31 | 51 |
| BS993 | 67 | 13 | 24 | 51 |
| BS994 | 57 | 13 | 27 | 51 |
| BS995 | 67 | 13 | 27 | 51 |
| BS996 | 67 | 13 | 31 | 56 |
| BS997 | 67 | 13 | 43 | 56 |
| BS998 | 67 | 13 | 24 | 54 |

|        |    |    |    |    |
|--------|----|----|----|----|
| BS999  | 57 | 13 | 35 | 56 |
| BS1000 | 67 | 13 | 29 | 55 |

| <b>Dispersal</b> | <b>Bootstrap (BS)</b> | <b>Origination time<br/>(Ma)</b> | <b>Time of the peak<br/>(Ma)</b> | <b>Inflection point 1<br/>(Ma)</b> | <b>Inflection point 2<br/>(Ma)</b> |
|------------------|-----------------------|----------------------------------|----------------------------------|------------------------------------|------------------------------------|
|                  | BS1                   | 67                               | 16                               | 11                                 | 51                                 |
|                  | BS2                   | 67                               | 17                               | 11                                 | 35                                 |
|                  | BS3                   | 67                               | 14                               | 23                                 | 51                                 |
|                  | BS4                   | 67                               | 14                               | 11                                 | 35                                 |
|                  | BS5                   | 67                               | 14                               | 24                                 | 54                                 |
|                  | BS6                   | 67                               | 14                               | 30                                 | 54                                 |
|                  | BS7                   | 57                               | 14                               | 11                                 | 43                                 |
|                  | BS8                   | 67                               | 14                               | 27                                 | 52                                 |
|                  | BS9                   | 67                               | 13                               | 28                                 | 54                                 |
|                  | BS10                  | 67                               | 13                               | 11                                 | 35                                 |
|                  | BS11                  | 67                               | 13                               | 11                                 | 56                                 |
|                  | BS12                  | 67                               | 13                               | 11                                 | 43                                 |
|                  | BS13                  | 67                               | 13                               | 11                                 | 35                                 |
|                  | BS14                  | 67                               | 13                               | 11                                 | 35                                 |
|                  | BS15                  | 67                               | 13                               | 11                                 | 53                                 |
|                  | BS16                  | 67                               | 13                               | 11                                 | 35                                 |
|                  | BS17                  | 67                               | 13                               | 11                                 | 55                                 |
|                  | BS18                  | 67                               | 13                               | 35                                 | 56                                 |
|                  | BS19                  | 67                               | 13                               | 31                                 | 46                                 |
|                  | BS20                  | 67                               | 15                               | 11                                 | 27                                 |
|                  | BS21                  | 67                               | 15                               | 11                                 | 43                                 |
|                  | BS22                  | 67                               | 15                               | 11                                 | 51                                 |
|                  | BS23                  | 57                               | 15                               | 35                                 | 51                                 |
|                  | BS24                  | 67                               | 15                               | 27                                 | 58                                 |
|                  | BS25                  | 67                               | 15                               | 11                                 | 28                                 |
|                  | BS26                  | 67                               | 15                               | 28                                 | 55                                 |
|                  | BS27                  | 57                               | 15                               | 27                                 | 52                                 |
|                  | BS28                  | 67                               | 15                               | 24                                 | 40                                 |
|                  | BS29                  | 67                               | 15                               | 27                                 | 45                                 |
|                  | BS30                  | 67                               | 15                               | 27                                 | 51                                 |
|                  | BS31                  | 67                               | 15                               | 28                                 | 51                                 |
|                  | BS32                  | 57                               | 15                               | 27                                 | 58                                 |
|                  | BS33                  | 67                               | 15                               | 11                                 | 35                                 |
|                  | BS34                  | 67                               | 13                               | 20                                 | 35                                 |
|                  | BS35                  | 67                               | 13                               | 24                                 | 56                                 |

|      |    |    |    |    |
|------|----|----|----|----|
| BS36 | 67 | 13 | 25 | 35 |
| BS37 | 57 | 13 | 28 | 51 |
| BS38 | 67 | 13 | 11 | 35 |
| BS39 | 67 | 13 | 24 | 42 |
| BS40 | 67 | 13 | 24 | 51 |
| BS41 | 67 | 13 | 24 | 54 |
| BS42 | 67 | 13 | 13 | 35 |
| BS43 | 67 | 13 | 28 | 51 |
| BS44 | 67 | 13 | 11 | 28 |
| BS45 | 67 | 13 | 28 | 55 |
| BS46 | 67 | 13 | 27 | 55 |
| BS47 | 57 | 13 | 46 | 56 |
| BS48 | 67 | 13 | 31 | 56 |
| BS49 | 57 | 13 | 27 | 55 |
| BS50 | 67 | 13 | 27 | 55 |
| BS51 | 67 | 13 | 11 | 35 |
| BS52 | 67 | 13 | 20 | 40 |
| BS53 | 67 | 13 | 31 | 51 |
| BS54 | 67 | 13 | 28 | 51 |
| BS55 | 67 | 13 | 35 | 54 |
| BS56 | 67 | 13 | 11 | 27 |
| BS57 | 67 | 13 | 24 | 42 |
| BS58 | 67 | 13 | 11 | 27 |
| BS59 | 57 | 13 | 35 | 56 |
| BS60 | 67 | 13 | 35 | 56 |
| BS61 | 67 | 13 | 19 | 51 |
| BS62 | 67 | 13 | 24 | 51 |
| BS63 | 67 | 13 | 25 | 35 |
| BS64 | 67 | 13 | 27 | 38 |
| BS65 | 67 | 13 | 35 | 54 |
| BS66 | 67 | 13 | 27 | 45 |
| BS67 | 67 | 13 | 31 | 46 |
| BS68 | 67 | 13 | 11 | 35 |
| BS69 | 67 | 13 | 23 | 51 |
| BS70 | 67 | 13 | 24 | 35 |
| BS71 | 67 | 13 | 24 | 46 |
| BS72 | 67 | 13 | 27 | 56 |
| BS73 | 67 | 13 | 28 | 51 |
| BS74 | 67 | 13 | 35 | 54 |
| BS75 | 67 | 13 | 11 | 35 |

|       |    |    |    |    |
|-------|----|----|----|----|
| BS76  | 67 | 13 | 24 | 56 |
| BS77  | 67 | 13 | 35 | 56 |
| BS78  | 67 | 13 | 27 | 38 |
| BS79  | 67 | 13 | 35 | 56 |
| BS80  | 67 | 13 | 27 | 52 |
| BS81  | 67 | 13 | 27 | 51 |
| BS82  | 67 | 13 | 27 | 55 |
| BS83  | 67 | 13 | 21 | 46 |
| BS84  | 67 | 13 | 23 | 46 |
| BS85  | 67 | 13 | 28 | 51 |
| BS86  | 67 | 13 | 23 | 45 |
| BS87  | 67 | 13 | 11 | 27 |
| BS88  | 57 | 13 | 11 | 28 |
| BS89  | 67 | 13 | 31 | 51 |
| BS90  | 67 | 13 | 20 | 55 |
| BS91  | 67 | 13 | 28 | 55 |
| BS92  | 67 | 13 | 31 | 56 |
| BS93  | 67 | 13 | 31 | 54 |
| BS94  | 67 | 13 | 24 | 55 |
| BS95  | 67 | 13 | 27 | 55 |
| BS96  | 67 | 13 | 28 | 55 |
| BS97  | 67 | 13 | 35 | 51 |
| BS98  | 67 | 13 | 35 | 56 |
| BS99  | 67 | 13 | 24 | 42 |
| BS100 | 67 | 13 | 27 | 55 |
| BS101 | 67 | 13 | 21 | 51 |
| BS102 | 67 | 13 | 35 | 56 |
| BS103 | 57 | 13 | 35 | 51 |
| BS104 | 67 | 13 | 27 | 55 |
| BS105 | 67 | 13 | 25 | 43 |
| BS106 | 67 | 13 | 11 | 31 |
| BS107 | 67 | 13 | 23 | 45 |
| BS108 | 67 | 13 | 11 | 35 |
| BS109 | 67 | 13 | 27 | 51 |
| BS110 | 67 | 13 | 35 | 59 |
| BS111 | 67 | 13 | 35 | 56 |
| BS112 | 67 | 13 | 26 | 51 |
| BS113 | 67 | 13 | 27 | 55 |
| BS114 | 67 | 13 | 27 | 52 |
| BS115 | 67 | 13 | 35 | 54 |



|       |    |    |    |    |
|-------|----|----|----|----|
| BS116 | 67 | 13 | 24 | 56 |
| BS117 | 57 | 13 | 35 | 56 |
| BS118 | 67 | 13 | 25 | 56 |
| BS119 | 67 | 13 | 28 | 51 |
| BS120 | 67 | 13 | 28 | 51 |
| BS121 | 67 | 13 | 27 | 54 |
| BS122 | 67 | 13 | 24 | 54 |
| BS123 | 57 | 13 | 35 | 56 |
| BS124 | 67 | 13 | 24 | 54 |
| BS125 | 67 | 13 | 27 | 55 |
| BS126 | 67 | 13 | 11 | 35 |
| BS127 | 67 | 13 | 24 | 51 |
| BS128 | 67 | 13 | 11 | 35 |
| BS129 | 67 | 13 | 35 | 51 |
| BS130 | 67 | 13 | 11 | 31 |
| BS131 | 67 | 13 | 30 | 54 |
| BS132 | 67 | 13 | 24 | 56 |
| BS133 | 67 | 13 | 28 | 58 |
| BS134 | 67 | 13 | 11 | 31 |
| BS135 | 67 | 14 | 27 | 38 |
| BS136 | 67 | 14 | 27 | 55 |
| BS137 | 67 | 14 | 27 | 55 |
| BS138 | 67 | 14 | 35 | 54 |
| BS139 | 67 | 14 | 42 | 59 |
| BS140 | 67 | 14 | 27 | 55 |
| BS141 | 67 | 14 | 20 | 51 |
| BS142 | 67 | 14 | 27 | 51 |
| BS143 | 67 | 14 | 24 | 53 |
| BS144 | 67 | 14 | 35 | 51 |
| BS145 | 67 | 14 | 35 | 56 |
| BS146 | 67 | 14 | 27 | 58 |
| BS147 | 67 | 14 | 28 | 55 |
| BS148 | 67 | 14 | 11 | 28 |
| BS149 | 67 | 14 | 35 | 56 |
| BS150 | 67 | 14 | 28 | 54 |
| BS151 | 67 | 14 | 28 | 51 |
| BS152 | 67 | 14 | 12 | 27 |
| BS153 | 67 | 14 | 24 | 54 |
| BS154 | 67 | 14 | 23 | 51 |
| BS155 | 67 | 14 | 28 | 55 |

|       |    |    |    |    |
|-------|----|----|----|----|
| BS156 | 67 | 14 | 35 | 51 |
| BS157 | 67 | 14 | 35 | 59 |
| BS158 | 67 | 14 | 27 | 51 |
| BS159 | 54 | 14 | 28 | 55 |
| BS160 | 67 | 14 | 25 | 35 |
| BS161 | 67 | 14 | 24 | 51 |
| BS162 | 67 | 14 | 22 | 35 |
| BS163 | 57 | 14 | 11 | 35 |
| BS164 | 67 | 14 | 27 | 51 |
| BS165 | 67 | 14 | 27 | 56 |
| BS166 | 67 | 14 | 28 | 51 |
| BS167 | 57 | 14 | 23 | 51 |
| BS168 | 57 | 14 | 34 | 53 |
| BS169 | 54 | 14 | 27 | 55 |
| BS170 | 67 | 14 | 31 | 54 |
| BS171 | 67 | 14 | 27 | 54 |
| BS172 | 67 | 14 | 31 | 51 |
| BS173 | 67 | 14 | 35 | 54 |
| BS174 | 67 | 14 | 35 | 56 |
| BS175 | 67 | 14 | 35 | 56 |
| BS176 | 67 | 14 | 11 | 29 |
| BS177 | 67 | 14 | 26 | 46 |
| BS178 | 67 | 14 | 28 | 55 |
| BS179 | 67 | 14 | 28 | 38 |
| BS180 | 67 | 14 | 11 | 35 |
| BS181 | 67 | 14 | 27 | 51 |
| BS182 | 67 | 14 | 11 | 35 |
| BS183 | 57 | 14 | 35 | 56 |
| BS184 | 57 | 14 | 35 | 54 |
| BS185 | 57 | 14 | 24 | 56 |
| BS186 | 57 | 14 | 28 | 55 |
| BS187 | 67 | 14 | 11 | 35 |
| BS188 | 57 | 14 | 28 | 51 |
| BS189 | 67 | 14 | 28 | 51 |
| BS190 | 67 | 14 | 23 | 51 |
| BS191 | 67 | 14 | 35 | 56 |
| BS192 | 67 | 14 | 27 | 55 |
| BS193 | 67 | 14 | 27 | 55 |
| BS194 | 57 | 14 | 11 | 35 |
| BS195 | 67 | 14 | 27 | 55 |

|       |    |    |    |    |
|-------|----|----|----|----|
| BS196 | 67 | 14 | 35 | 54 |
| BS197 | 67 | 13 | 11 | 28 |
| BS198 | 67 | 13 | 28 | 55 |
| BS199 | 57 | 13 | 27 | 56 |
| BS200 | 67 | 13 | 28 | 51 |
| BS201 | 67 | 13 | 24 | 45 |
| BS202 | 57 | 13 | 11 | 27 |
| BS203 | 67 | 13 | 28 | 55 |
| BS204 | 67 | 13 | 24 | 51 |
| BS205 | 67 | 13 | 27 | 55 |
| BS206 | 67 | 13 | 31 | 51 |
| BS207 | 67 | 13 | 27 | 38 |
| BS208 | 57 | 13 | 27 | 55 |
| BS209 | 67 | 13 | 11 | 27 |
| BS210 | 67 | 13 | 25 | 51 |
| BS211 | 67 | 13 | 28 | 51 |
| BS212 | 67 | 13 | 27 | 51 |
| BS213 | 57 | 13 | 27 | 55 |
| BS214 | 54 | 13 | 11 | 35 |
| BS215 | 67 | 13 | 35 | 51 |
| BS216 | 67 | 13 | 23 | 55 |
| BS217 | 67 | 13 | 27 | 55 |
| BS218 | 67 | 13 | 11 | 35 |
| BS219 | 67 | 13 | 27 | 58 |
| BS220 | 67 | 13 | 27 | 55 |
| BS221 | 57 | 13 | 35 | 56 |
| BS222 | 67 | 13 | 23 | 43 |
| BS223 | 57 | 13 | 35 | 56 |
| BS224 | 67 | 13 | 28 | 51 |
| BS225 | 57 | 13 | 27 | 55 |
| BS226 | 54 | 13 | 25 | 35 |
| BS227 | 67 | 13 | 27 | 52 |
| BS228 | 57 | 13 | 27 | 38 |
| BS229 | 67 | 13 | 31 | 51 |
| BS230 | 67 | 13 | 35 | 54 |
| BS231 | 67 | 13 | 35 | 54 |
| BS232 | 67 | 13 | 35 | 56 |
| BS233 | 67 | 13 | 31 | 54 |
| BS234 | 67 | 13 | 28 | 56 |
| BS235 | 57 | 13 | 24 | 54 |

|       |    |    |    |    |
|-------|----|----|----|----|
| BS236 | 57 | 13 | 11 | 31 |
| BS237 | 67 | 13 | 35 | 56 |
| BS238 | 57 | 13 | 27 | 55 |
| BS239 | 67 | 13 | 28 | 51 |
| BS240 | 67 | 13 | 35 | 51 |
| BS241 | 67 | 13 | 35 | 54 |
| BS242 | 67 | 13 | 11 | 42 |
| BS243 | 57 | 13 | 30 | 54 |
| BS244 | 67 | 13 | 35 | 56 |
| BS245 | 67 | 13 | 25 | 56 |
| BS246 | 67 | 13 | 11 | 35 |
| BS247 | 67 | 13 | 27 | 38 |
| BS248 | 67 | 13 | 28 | 55 |
| BS249 | 67 | 13 | 35 | 56 |
| BS250 | 67 | 13 | 11 | 42 |
| BS251 | 67 | 13 | 11 | 35 |
| BS252 | 57 | 13 | 35 | 54 |
| BS253 | 67 | 13 | 38 | 55 |
| BS254 | 57 | 13 | 27 | 51 |
| BS255 | 67 | 13 | 18 | 51 |
| BS256 | 67 | 13 | 28 | 55 |
| BS257 | 67 | 13 | 29 | 54 |
| BS258 | 67 | 13 | 28 | 55 |
| BS259 | 67 | 13 | 27 | 55 |
| BS260 | 67 | 13 | 11 | 35 |
| BS261 | 67 | 13 | 21 | 57 |
| BS262 | 57 | 13 | 11 | 43 |
| BS263 | 67 | 13 | 11 | 35 |
| BS264 | 67 | 13 | 35 | 54 |
| BS265 | 67 | 13 | 31 | 54 |
| BS266 | 57 | 13 | 19 | 35 |
| BS267 | 67 | 13 | 27 | 52 |
| BS268 | 67 | 13 | 31 | 54 |
| BS269 | 67 | 13 | 31 | 54 |
| BS270 | 67 | 13 | 11 | 31 |
| BS271 | 67 | 13 | 11 | 43 |
| BS272 | 67 | 13 | 27 | 51 |
| BS273 | 67 | 13 | 35 | 56 |
| BS274 | 67 | 13 | 27 | 55 |
| BS275 | 67 | 13 | 11 | 31 |

|       |    |    |    |    |
|-------|----|----|----|----|
| BS276 | 67 | 13 | 28 | 51 |
| BS277 | 67 | 13 | 24 | 54 |
| BS278 | 57 | 13 | 18 | 28 |
| BS279 | 67 | 13 | 27 | 55 |
| BS280 | 67 | 13 | 26 | 43 |
| BS281 | 54 | 13 | 35 | 51 |
| BS282 | 67 | 13 | 11 | 28 |
| BS283 | 67 | 13 | 35 | 51 |
| BS284 | 67 | 13 | 25 | 35 |
| BS285 | 67 | 13 | 31 | 54 |
| BS286 | 67 | 13 | 24 | 43 |
| BS287 | 67 | 13 | 28 | 51 |
| BS288 | 67 | 13 | 31 | 56 |
| BS289 | 57 | 13 | 31 | 51 |
| BS290 | 67 | 13 | 11 | 27 |
| BS291 | 57 | 13 | 35 | 51 |
| BS292 | 67 | 13 | 35 | 56 |
| BS293 | 57 | 13 | 24 | 54 |
| BS294 | 67 | 13 | 11 | 28 |
| BS295 | 67 | 13 | 11 | 27 |
| BS296 | 57 | 13 | 11 | 35 |
| BS297 | 67 | 13 | 28 | 51 |
| BS298 | 67 | 13 | 12 | 35 |
| BS299 | 67 | 13 | 27 | 38 |
| BS300 | 67 | 13 | 35 | 51 |
| BS301 | 67 | 13 | 24 | 56 |
| BS302 | 67 | 13 | 35 | 51 |
| BS303 | 57 | 13 | 27 | 52 |
| BS304 | 67 | 13 | 24 | 56 |
| BS305 | 67 | 13 | 27 | 51 |
| BS306 | 67 | 13 | 28 | 51 |
| BS307 | 67 | 13 | 23 | 51 |
| BS308 | 67 | 13 | 35 | 56 |
| BS309 | 67 | 13 | 11 | 27 |
| BS310 | 67 | 13 | 11 | 35 |
| BS311 | 67 | 13 | 24 | 53 |
| BS312 | 67 | 13 | 25 | 51 |
| BS313 | 67 | 13 | 11 | 27 |
| BS314 | 67 | 13 | 28 | 55 |
| BS315 | 67 | 13 | 24 | 35 |

|       |    |    |    |    |
|-------|----|----|----|----|
| BS316 | 67 | 13 | 18 | 51 |
| BS317 | 67 | 13 | 27 | 55 |
| BS318 | 67 | 13 | 35 | 54 |
| BS319 | 67 | 13 | 24 | 49 |
| BS320 | 54 | 13 | 27 | 51 |
| BS321 | 57 | 13 | 28 | 51 |
| BS322 | 57 | 13 | 28 | 51 |
| BS323 | 67 | 13 | 24 | 54 |
| BS324 | 67 | 13 | 28 | 51 |
| BS325 | 67 | 13 | 27 | 51 |
| BS326 | 57 | 13 | 24 | 49 |
| BS327 | 67 | 13 | 28 | 51 |
| BS328 | 54 | 13 | 24 | 46 |
| BS329 | 67 | 13 | 35 | 56 |
| BS330 | 67 | 13 | 27 | 51 |
| BS331 | 67 | 13 | 35 | 54 |
| BS332 | 67 | 13 | 35 | 54 |
| BS333 | 67 | 13 | 35 | 54 |
| BS334 | 67 | 13 | 31 | 54 |
| BS335 | 67 | 13 | 27 | 45 |
| BS336 | 67 | 13 | 27 | 56 |
| BS337 | 67 | 13 | 35 | 54 |
| BS338 | 67 | 13 | 11 | 35 |
| BS339 | 67 | 13 | 27 | 51 |
| BS340 | 67 | 13 | 11 | 28 |
| BS341 | 67 | 13 | 35 | 56 |
| BS342 | 67 | 13 | 28 | 51 |
| BS343 | 67 | 13 | 23 | 51 |
| BS344 | 67 | 13 | 11 | 35 |
| BS345 | 57 | 13 | 11 | 27 |
| BS346 | 67 | 13 | 28 | 51 |
| BS347 | 67 | 13 | 27 | 51 |
| BS348 | 67 | 13 | 35 | 56 |
| BS349 | 57 | 13 | 25 | 35 |
| BS350 | 67 | 13 | 31 | 56 |
| BS351 | 67 | 13 | 35 | 56 |
| BS352 | 67 | 13 | 35 | 56 |
| BS353 | 67 | 13 | 35 | 56 |
| BS354 | 67 | 13 | 11 | 35 |
| BS355 | 67 | 13 | 35 | 54 |

|       |    |    |    |    |
|-------|----|----|----|----|
| BS356 | 67 | 13 | 25 | 55 |
| BS357 | 67 | 13 | 24 | 51 |
| BS358 | 67 | 13 | 35 | 56 |
| BS359 | 67 | 13 | 11 | 27 |
| BS360 | 67 | 13 | 11 | 35 |
| BS361 | 67 | 13 | 28 | 51 |
| BS362 | 67 | 13 | 28 | 55 |
| BS363 | 54 | 13 | 27 | 53 |
| BS364 | 57 | 13 | 35 | 59 |
| BS365 | 67 | 13 | 35 | 54 |
| BS366 | 67 | 13 | 25 | 35 |
| BS367 | 54 | 13 | 28 | 55 |
| BS368 | 57 | 13 | 11 | 28 |
| BS369 | 67 | 13 | 24 | 54 |
| BS370 | 67 | 13 | 29 | 54 |
| BS371 | 67 | 13 | 31 | 54 |
| BS372 | 67 | 13 | 28 | 54 |
| BS373 | 67 | 13 | 24 | 56 |
| BS374 | 67 | 13 | 24 | 54 |
| BS375 | 67 | 13 | 35 | 56 |
| BS376 | 67 | 13 | 28 | 51 |
| BS377 | 57 | 13 | 35 | 45 |
| BS378 | 67 | 13 | 28 | 51 |
| BS379 | 67 | 13 | 25 | 35 |
| BS380 | 67 | 13 | 27 | 51 |
| BS381 | 67 | 13 | 19 | 51 |
| BS382 | 67 | 13 | 11 | 35 |
| BS383 | 67 | 13 | 31 | 51 |
| BS384 | 67 | 13 | 11 | 35 |
| BS385 | 67 | 13 | 35 | 56 |
| BS386 | 67 | 13 | 21 | 51 |
| BS387 | 57 | 13 | 27 | 51 |
| BS388 | 67 | 13 | 25 | 55 |
| BS389 | 67 | 13 | 35 | 56 |
| BS390 | 67 | 13 | 24 | 46 |
| BS391 | 67 | 13 | 31 | 56 |
| BS392 | 67 | 13 | 27 | 38 |
| BS393 | 57 | 13 | 35 | 51 |
| BS394 | 57 | 13 | 24 | 56 |
| BS395 | 67 | 13 | 27 | 55 |

|       |    |    |    |    |
|-------|----|----|----|----|
| BS396 | 67 | 13 | 27 | 58 |
| BS397 | 57 | 13 | 35 | 56 |
| BS398 | 67 | 13 | 27 | 51 |
| BS399 | 57 | 13 | 35 | 51 |
| BS400 | 67 | 13 | 35 | 54 |
| BS401 | 67 | 13 | 35 | 56 |
| BS402 | 67 | 13 | 11 | 28 |
| BS403 | 67 | 13 | 27 | 51 |
| BS404 | 67 | 13 | 21 | 54 |
| BS405 | 57 | 13 | 11 | 27 |
| BS406 | 67 | 13 | 23 | 43 |
| BS407 | 67 | 13 | 28 | 54 |
| BS408 | 67 | 13 | 28 | 51 |
| BS409 | 67 | 13 | 11 | 40 |
| BS410 | 67 | 13 | 27 | 51 |
| BS411 | 57 | 13 | 24 | 54 |
| BS412 | 67 | 13 | 28 | 55 |
| BS413 | 67 | 13 | 27 | 51 |
| BS414 | 67 | 13 | 27 | 55 |
| BS415 | 67 | 13 | 11 | 28 |
| BS416 | 67 | 13 | 35 | 51 |
| BS417 | 67 | 13 | 35 | 56 |
| BS418 | 67 | 13 | 27 | 51 |
| BS419 | 67 | 13 | 43 | 56 |
| BS420 | 67 | 13 | 24 | 56 |
| BS421 | 67 | 13 | 17 | 46 |
| BS422 | 67 | 13 | 24 | 55 |
| BS423 | 67 | 13 | 30 | 51 |
| BS424 | 52 | 13 | 24 | 51 |
| BS425 | 67 | 13 | 27 | 55 |
| BS426 | 67 | 13 | 24 | 55 |
| BS427 | 67 | 13 | 27 | 45 |
| BS428 | 67 | 13 | 35 | 54 |
| BS429 | 67 | 13 | 27 | 45 |
| BS430 | 67 | 13 | 35 | 54 |
| BS431 | 67 | 13 | 24 | 51 |
| BS432 | 67 | 13 | 28 | 56 |
| BS433 | 67 | 13 | 27 | 56 |
| BS434 | 67 | 13 | 24 | 56 |
| BS435 | 67 | 13 | 35 | 51 |



|       |    |    |    |    |
|-------|----|----|----|----|
| BS436 | 67 | 13 | 27 | 55 |
| BS437 | 67 | 13 | 28 | 51 |
| BS438 | 67 | 13 | 35 | 54 |
| BS439 | 67 | 13 | 27 | 52 |
| BS440 | 57 | 13 | 35 | 56 |
| BS441 | 67 | 13 | 11 | 46 |
| BS442 | 67 | 13 | 35 | 51 |
| BS443 | 67 | 13 | 27 | 52 |
| BS444 | 67 | 13 | 28 | 55 |
| BS445 | 67 | 13 | 28 | 51 |
| BS446 | 67 | 13 | 27 | 55 |
| BS447 | 67 | 13 | 25 | 35 |
| BS448 | 67 | 13 | 35 | 56 |
| BS449 | 67 | 13 | 11 | 35 |
| BS450 | 67 | 13 | 27 | 51 |
| BS451 | 67 | 13 | 27 | 58 |
| BS452 | 67 | 13 | 28 | 55 |
| BS453 | 67 | 13 | 35 | 56 |
| BS454 | 67 | 13 | 35 | 56 |
| BS455 | 57 | 13 | 27 | 55 |
| BS456 | 57 | 13 | 35 | 56 |
| BS457 | 67 | 13 | 27 | 55 |
| BS458 | 67 | 13 | 43 | 59 |
| BS459 | 67 | 13 | 35 | 54 |
| BS460 | 57 | 13 | 35 | 51 |
| BS461 | 67 | 13 | 11 | 35 |
| BS462 | 67 | 13 | 35 | 51 |
| BS463 | 67 | 13 | 35 | 56 |
| BS464 | 67 | 13 | 20 | 38 |
| BS465 | 67 | 13 | 27 | 55 |
| BS466 | 57 | 13 | 31 | 56 |
| BS467 | 57 | 13 | 27 | 52 |
| BS468 | 67 | 13 | 30 | 54 |
| BS469 | 57 | 13 | 11 | 27 |
| BS470 | 67 | 13 | 11 | 27 |
| BS471 | 67 | 13 | 26 | 46 |
| BS472 | 57 | 13 | 27 | 55 |
| BS473 | 67 | 13 | 25 | 35 |
| BS474 | 67 | 13 | 27 | 55 |
| BS475 | 67 | 13 | 35 | 56 |

|       |    |    |    |    |
|-------|----|----|----|----|
| BS476 | 67 | 13 | 35 | 56 |
| BS477 | 67 | 13 | 21 | 46 |
| BS478 | 57 | 13 | 11 | 27 |
| BS479 | 67 | 13 | 27 | 51 |
| BS480 | 67 | 13 | 11 | 28 |
| BS481 | 67 | 13 | 35 | 54 |
| BS482 | 67 | 13 | 22 | 35 |
| BS483 | 67 | 13 | 36 | 51 |
| BS484 | 67 | 13 | 35 | 54 |
| BS485 | 67 | 13 | 24 | 43 |
| BS486 | 57 | 13 | 24 | 54 |
| BS487 | 67 | 13 | 13 | 35 |
| BS488 | 67 | 13 | 35 | 54 |
| BS489 | 67 | 13 | 30 | 51 |
| BS490 | 67 | 13 | 11 | 27 |
| BS491 | 67 | 13 | 35 | 56 |
| BS492 | 67 | 13 | 27 | 55 |
| BS493 | 67 | 13 | 11 | 27 |
| BS494 | 67 | 13 | 28 | 51 |
| BS495 | 67 | 13 | 35 | 51 |
| BS496 | 57 | 13 | 11 | 35 |
| BS497 | 67 | 13 | 27 | 51 |
| BS498 | 67 | 13 | 24 | 35 |
| BS499 | 67 | 13 | 27 | 51 |
| BS500 | 67 | 13 | 24 | 56 |
| BS501 | 67 | 13 | 11 | 35 |
| BS502 | 67 | 13 | 31 | 54 |
| BS503 | 57 | 13 | 18 | 51 |
| BS504 | 67 | 13 | 11 | 27 |
| BS505 | 67 | 13 | 35 | 56 |
| BS506 | 57 | 13 | 27 | 45 |
| BS507 | 57 | 13 | 31 | 51 |
| BS508 | 67 | 13 | 35 | 54 |
| BS509 | 57 | 13 | 28 | 58 |
| BS510 | 67 | 13 | 11 | 31 |
| BS511 | 67 | 13 | 28 | 46 |
| BS512 | 67 | 13 | 28 | 51 |
| BS513 | 67 | 13 | 35 | 54 |
| BS514 | 67 | 13 | 35 | 54 |
| BS515 | 57 | 13 | 28 | 55 |

|       |    |    |    |    |
|-------|----|----|----|----|
| BS516 | 57 | 13 | 29 | 54 |
| BS517 | 67 | 13 | 24 | 39 |
| BS518 | 67 | 13 | 11 | 35 |
| BS519 | 67 | 13 | 28 | 51 |
| BS520 | 67 | 13 | 27 | 52 |
| BS521 | 67 | 13 | 27 | 55 |
| BS522 | 67 | 13 | 19 | 43 |
| BS523 | 67 | 13 | 27 | 41 |
| BS524 | 67 | 13 | 21 | 56 |
| BS525 | 67 | 13 | 11 | 31 |
| BS526 | 67 | 13 | 23 | 51 |
| BS527 | 57 | 13 | 28 | 51 |
| BS528 | 67 | 13 | 27 | 51 |
| BS529 | 67 | 13 | 27 | 51 |
| BS530 | 54 | 13 | 27 | 55 |
| BS531 | 67 | 13 | 27 | 51 |
| BS532 | 67 | 13 | 27 | 38 |
| BS533 | 67 | 13 | 20 | 35 |
| BS534 | 67 | 13 | 27 | 58 |
| BS535 | 57 | 13 | 31 | 54 |
| BS536 | 67 | 13 | 35 | 56 |
| BS537 | 67 | 13 | 27 | 51 |
| BS538 | 67 | 13 | 24 | 54 |
| BS539 | 67 | 13 | 24 | 51 |
| BS540 | 57 | 13 | 11 | 46 |
| BS541 | 67 | 13 | 11 | 28 |
| BS542 | 67 | 13 | 27 | 55 |
| BS543 | 67 | 13 | 35 | 54 |
| BS544 | 67 | 13 | 24 | 54 |
| BS545 | 57 | 13 | 11 | 51 |
| BS546 | 67 | 13 | 35 | 51 |
| BS547 | 67 | 13 | 28 | 51 |
| BS548 | 67 | 13 | 35 | 56 |
| BS549 | 67 | 13 | 39 | 51 |
| BS550 | 67 | 13 | 27 | 51 |
| BS551 | 67 | 13 | 28 | 43 |
| BS552 | 57 | 13 | 27 | 52 |
| BS553 | 67 | 13 | 35 | 51 |
| BS554 | 67 | 13 | 27 | 51 |
| BS555 | 67 | 13 | 27 | 55 |

|       |    |    |    |    |
|-------|----|----|----|----|
| BS556 | 67 | 13 | 24 | 56 |
| BS557 | 67 | 13 | 31 | 46 |
| BS558 | 67 | 13 | 35 | 56 |
| BS559 | 67 | 13 | 11 | 35 |
| BS560 | 67 | 13 | 27 | 51 |
| BS561 | 67 | 13 | 27 | 51 |
| BS562 | 67 | 13 | 27 | 51 |
| BS563 | 67 | 13 | 27 | 51 |
| BS564 | 67 | 13 | 28 | 51 |
| BS565 | 67 | 13 | 27 | 55 |
| BS566 | 67 | 13 | 27 | 55 |
| BS567 | 67 | 13 | 27 | 51 |
| BS568 | 67 | 13 | 18 | 51 |
| BS569 | 67 | 13 | 35 | 51 |
| BS570 | 67 | 13 | 19 | 55 |
| BS571 | 67 | 13 | 35 | 56 |
| BS572 | 67 | 13 | 25 | 35 |
| BS573 | 67 | 13 | 27 | 51 |
| BS574 | 67 | 13 | 35 | 51 |
| BS575 | 67 | 13 | 35 | 56 |
| BS576 | 67 | 13 | 27 | 55 |
| BS577 | 67 | 13 | 35 | 56 |
| BS578 | 67 | 13 | 35 | 51 |
| BS579 | 67 | 13 | 25 | 35 |
| BS580 | 67 | 13 | 35 | 56 |
| BS581 | 67 | 13 | 27 | 38 |
| BS582 | 57 | 13 | 24 | 35 |
| BS583 | 67 | 13 | 27 | 51 |
| BS584 | 67 | 13 | 35 | 56 |
| BS585 | 67 | 13 | 25 | 51 |
| BS586 | 57 | 13 | 11 | 28 |
| BS587 | 67 | 13 | 24 | 56 |
| BS588 | 57 | 13 | 35 | 56 |
| BS589 | 67 | 13 | 11 | 28 |
| BS590 | 67 | 13 | 27 | 51 |
| BS591 | 57 | 13 | 28 | 55 |
| BS592 | 67 | 13 | 30 | 54 |
| BS593 | 67 | 13 | 35 | 56 |
| BS594 | 67 | 13 | 28 | 55 |
| BS595 | 67 | 13 | 11 | 31 |

|       |    |    |    |    |
|-------|----|----|----|----|
| BS596 | 57 | 13 | 27 | 51 |
| BS597 | 67 | 13 | 27 | 51 |
| BS598 | 67 | 13 | 31 | 51 |
| BS599 | 67 | 13 | 24 | 54 |
| BS600 | 67 | 13 | 27 | 55 |
| BS601 | 67 | 13 | 27 | 55 |
| BS602 | 67 | 13 | 27 | 52 |
| BS603 | 67 | 13 | 28 | 51 |
| BS604 | 67 | 13 | 11 | 35 |
| BS605 | 67 | 13 | 12 | 35 |
| BS606 | 67 | 13 | 28 | 51 |
| BS607 | 54 | 13 | 24 | 56 |
| BS608 | 57 | 13 | 28 | 51 |
| BS609 | 67 | 13 | 25 | 51 |
| BS610 | 67 | 14 | 11 | 27 |
| BS611 | 67 | 14 | 11 | 27 |
| BS612 | 67 | 14 | 24 | 40 |
| BS613 | 57 | 14 | 28 | 55 |
| BS614 | 67 | 14 | 23 | 55 |
| BS615 | 67 | 14 | 35 | 54 |
| BS616 | 67 | 14 | 28 | 51 |
| BS617 | 67 | 14 | 11 | 27 |
| BS618 | 57 | 14 | 28 | 51 |
| BS619 | 67 | 14 | 24 | 54 |
| BS620 | 67 | 14 | 35 | 56 |
| BS621 | 67 | 14 | 27 | 55 |
| BS622 | 67 | 14 | 11 | 35 |
| BS623 | 57 | 14 | 28 | 51 |
| BS624 | 67 | 14 | 11 | 35 |
| BS625 | 67 | 14 | 31 | 51 |
| BS626 | 67 | 14 | 11 | 31 |
| BS627 | 67 | 14 | 29 | 45 |
| BS628 | 67 | 14 | 11 | 28 |
| BS629 | 67 | 14 | 28 | 55 |
| BS630 | 67 | 14 | 35 | 51 |
| BS631 | 67 | 14 | 28 | 51 |
| BS632 | 57 | 14 | 13 | 35 |
| BS633 | 67 | 14 | 28 | 45 |
| BS634 | 67 | 14 | 27 | 55 |
| BS635 | 67 | 14 | 35 | 56 |

|       |    |    |    |    |
|-------|----|----|----|----|
| BS636 | 67 | 14 | 30 | 56 |
| BS637 | 67 | 14 | 27 | 55 |
| BS638 | 67 | 14 | 11 | 27 |
| BS639 | 54 | 14 | 31 | 54 |
| BS640 | 67 | 14 | 11 | 35 |
| BS641 | 67 | 14 | 27 | 51 |
| BS642 | 57 | 14 | 27 | 51 |
| BS643 | 67 | 14 | 28 | 51 |
| BS644 | 67 | 14 | 11 | 43 |
| BS645 | 67 | 14 | 28 | 51 |
| BS646 | 67 | 14 | 11 | 28 |
| BS647 | 67 | 14 | 28 | 51 |
| BS648 | 67 | 14 | 27 | 51 |
| BS649 | 67 | 14 | 24 | 54 |
| BS650 | 67 | 14 | 25 | 35 |
| BS651 | 67 | 14 | 28 | 55 |
| BS652 | 67 | 14 | 27 | 55 |
| BS653 | 67 | 14 | 35 | 56 |
| BS654 | 57 | 14 | 24 | 54 |
| BS655 | 67 | 14 | 27 | 51 |
| BS656 | 57 | 14 | 35 | 56 |
| BS657 | 67 | 14 | 31 | 51 |
| BS658 | 67 | 14 | 27 | 51 |
| BS659 | 57 | 14 | 24 | 55 |
| BS660 | 57 | 14 | 25 | 55 |
| BS661 | 57 | 14 | 35 | 56 |
| BS662 | 67 | 14 | 27 | 51 |
| BS663 | 67 | 14 | 27 | 52 |
| BS664 | 57 | 14 | 11 | 35 |
| BS665 | 57 | 14 | 11 | 31 |
| BS666 | 67 | 14 | 27 | 51 |
| BS667 | 67 | 14 | 20 | 40 |
| BS668 | 67 | 14 | 27 | 55 |
| BS669 | 67 | 14 | 28 | 55 |
| BS670 | 67 | 14 | 27 | 51 |
| BS671 | 57 | 14 | 35 | 54 |
| BS672 | 67 | 14 | 27 | 52 |
| BS673 | 67 | 14 | 28 | 51 |
| BS674 | 57 | 14 | 25 | 43 |
| BS675 | 67 | 14 | 35 | 56 |

|       |    |    |    |    |
|-------|----|----|----|----|
| BS676 | 67 | 14 | 40 | 52 |
| BS677 | 67 | 14 | 11 | 28 |
| BS678 | 67 | 14 | 35 | 56 |
| BS679 | 67 | 14 | 31 | 51 |
| BS680 | 67 | 14 | 35 | 56 |
| BS681 | 67 | 14 | 31 | 56 |
| BS682 | 67 | 14 | 35 | 51 |
| BS683 | 67 | 14 | 35 | 56 |
| BS684 | 67 | 14 | 11 | 28 |
| BS685 | 67 | 14 | 40 | 56 |
| BS686 | 67 | 14 | 35 | 56 |
| BS687 | 67 | 14 | 24 | 56 |
| BS688 | 67 | 14 | 35 | 56 |
| BS689 | 67 | 14 | 24 | 51 |
| BS690 | 67 | 14 | 27 | 51 |
| BS691 | 67 | 14 | 24 | 55 |
| BS692 | 57 | 14 | 27 | 55 |
| BS693 | 67 | 14 | 27 | 52 |
| BS694 | 67 | 14 | 19 | 38 |
| BS695 | 57 | 14 | 27 | 55 |
| BS696 | 67 | 14 | 11 | 28 |
| BS697 | 67 | 14 | 35 | 56 |
| BS698 | 57 | 14 | 35 | 51 |
| BS699 | 67 | 14 | 28 | 51 |
| BS700 | 67 | 14 | 11 | 35 |
| BS701 | 67 | 14 | 27 | 51 |
| BS702 | 67 | 14 | 22 | 35 |
| BS703 | 67 | 14 | 35 | 56 |
| BS704 | 57 | 14 | 27 | 55 |
| BS705 | 67 | 14 | 24 | 56 |
| BS706 | 67 | 14 | 27 | 51 |
| BS707 | 67 | 14 | 35 | 56 |
| BS708 | 67 | 14 | 24 | 56 |
| BS709 | 67 | 14 | 11 | 27 |
| BS710 | 67 | 14 | 31 | 54 |
| BS711 | 57 | 14 | 27 | 52 |
| BS712 | 67 | 14 | 11 | 28 |
| BS713 | 67 | 14 | 28 | 55 |
| BS714 | 67 | 14 | 24 | 54 |
| BS715 | 67 | 14 | 11 | 28 |

|       |    |    |    |    |
|-------|----|----|----|----|
| BS716 | 67 | 14 | 35 | 56 |
| BS717 | 67 | 14 | 27 | 51 |
| BS718 | 67 | 14 | 12 | 35 |
| BS719 | 67 | 14 | 35 | 56 |
| BS720 | 67 | 14 | 35 | 51 |
| BS721 | 67 | 14 | 30 | 54 |
| BS722 | 67 | 14 | 28 | 51 |
| BS723 | 67 | 14 | 27 | 55 |
| BS724 | 67 | 14 | 28 | 55 |
| BS725 | 67 | 14 | 23 | 43 |
| BS726 | 67 | 14 | 24 | 51 |
| BS727 | 67 | 14 | 35 | 51 |
| BS728 | 67 | 14 | 35 | 54 |
| BS729 | 67 | 14 | 35 | 56 |
| BS730 | 67 | 14 | 27 | 55 |
| BS731 | 67 | 14 | 27 | 55 |
| BS732 | 67 | 14 | 11 | 27 |
| BS733 | 54 | 14 | 35 | 54 |
| BS734 | 54 | 14 | 24 | 51 |
| BS735 | 67 | 14 | 11 | 27 |
| BS736 | 67 | 14 | 11 | 35 |
| BS737 | 54 | 14 | 27 | 51 |
| BS738 | 67 | 14 | 27 | 55 |
| BS739 | 67 | 14 | 35 | 56 |
| BS740 | 67 | 14 | 28 | 55 |
| BS741 | 67 | 14 | 24 | 54 |
| BS742 | 67 | 14 | 24 | 56 |
| BS743 | 67 | 14 | 21 | 56 |
| BS744 | 57 | 14 | 11 | 31 |
| BS745 | 67 | 14 | 24 | 54 |
| BS746 | 67 | 14 | 35 | 54 |
| BS747 | 67 | 14 | 27 | 55 |
| BS748 | 57 | 14 | 25 | 55 |
| BS749 | 67 | 14 | 31 | 51 |
| BS750 | 57 | 14 | 27 | 55 |
| BS751 | 67 | 14 | 31 | 55 |
| BS752 | 67 | 14 | 28 | 51 |
| BS753 | 67 | 14 | 24 | 56 |
| BS754 | 54 | 14 | 35 | 56 |
| BS755 | 67 | 14 | 28 | 54 |



|       |    |    |    |    |
|-------|----|----|----|----|
| BS756 | 67 | 14 | 11 | 35 |
| BS757 | 67 | 14 | 27 | 51 |
| BS758 | 57 | 14 | 28 | 51 |
| BS759 | 57 | 14 | 28 | 51 |
| BS760 | 67 | 14 | 24 | 55 |
| BS761 | 67 | 14 | 23 | 51 |
| BS762 | 67 | 14 | 11 | 35 |
| BS763 | 67 | 14 | 27 | 58 |
| BS764 | 67 | 14 | 11 | 27 |
| BS765 | 67 | 14 | 28 | 55 |
| BS766 | 67 | 14 | 25 | 55 |
| BS767 | 67 | 14 | 27 | 45 |
| BS768 | 67 | 14 | 27 | 55 |
| BS769 | 67 | 14 | 11 | 28 |
| BS770 | 67 | 14 | 31 | 51 |
| BS771 | 67 | 14 | 24 | 56 |
| BS772 | 67 | 14 | 27 | 55 |
| BS773 | 67 | 14 | 35 | 56 |
| BS774 | 67 | 14 | 28 | 51 |
| BS775 | 67 | 14 | 24 | 54 |
| BS776 | 67 | 14 | 25 | 51 |
| BS777 | 67 | 14 | 20 | 35 |
| BS778 | 67 | 14 | 24 | 54 |
| BS779 | 67 | 14 | 38 | 56 |
| BS780 | 67 | 14 | 11 | 35 |
| BS781 | 67 | 14 | 27 | 58 |
| BS782 | 67 | 14 | 27 | 58 |
| BS783 | 67 | 14 | 41 | 51 |
| BS784 | 67 | 14 | 31 | 54 |
| BS785 | 67 | 14 | 24 | 51 |
| BS786 | 67 | 14 | 27 | 45 |
| BS787 | 57 | 14 | 27 | 51 |
| BS788 | 67 | 14 | 27 | 51 |
| BS789 | 67 | 14 | 24 | 55 |
| BS790 | 67 | 14 | 23 | 51 |
| BS791 | 67 | 14 | 28 | 55 |
| BS792 | 67 | 14 | 25 | 35 |
| BS793 | 67 | 14 | 13 | 35 |
| BS794 | 67 | 14 | 11 | 35 |
| BS795 | 67 | 14 | 24 | 40 |

|       |    |    |    |    |
|-------|----|----|----|----|
| BS796 | 67 | 14 | 27 | 54 |
| BS797 | 67 | 14 | 23 | 51 |
| BS798 | 67 | 14 | 27 | 41 |
| BS799 | 67 | 14 | 24 | 56 |
| BS800 | 54 | 14 | 21 | 51 |
| BS801 | 67 | 14 | 27 | 38 |
| BS802 | 67 | 14 | 11 | 35 |
| BS803 | 57 | 14 | 31 | 51 |
| BS804 | 67 | 14 | 35 | 56 |
| BS805 | 67 | 14 | 35 | 54 |
| BS806 | 67 | 14 | 24 | 55 |
| BS807 | 57 | 14 | 28 | 51 |
| BS808 | 67 | 14 | 11 | 31 |
| BS809 | 67 | 14 | 35 | 54 |
| BS810 | 57 | 14 | 28 | 51 |
| BS811 | 67 | 14 | 24 | 54 |
| BS812 | 57 | 14 | 21 | 51 |
| BS813 | 67 | 14 | 26 | 43 |
| BS814 | 67 | 14 | 35 | 56 |
| BS815 | 67 | 14 | 25 | 35 |
| BS816 | 57 | 14 | 23 | 55 |
| BS817 | 67 | 14 | 28 | 51 |
| BS818 | 67 | 14 | 11 | 35 |
| BS819 | 67 | 14 | 28 | 51 |
| BS820 | 67 | 14 | 28 | 51 |
| BS821 | 67 | 14 | 24 | 51 |
| BS822 | 67 | 14 | 11 | 27 |
| BS823 | 67 | 14 | 28 | 55 |
| BS824 | 67 | 14 | 27 | 55 |
| BS825 | 67 | 14 | 28 | 55 |
| BS826 | 57 | 14 | 27 | 51 |
| BS827 | 57 | 14 | 35 | 54 |
| BS828 | 67 | 14 | 25 | 35 |
| BS829 | 67 | 14 | 31 | 56 |
| BS830 | 67 | 14 | 27 | 55 |
| BS831 | 67 | 14 | 27 | 52 |
| BS832 | 57 | 14 | 27 | 51 |
| BS833 | 67 | 14 | 31 | 51 |
| BS834 | 67 | 14 | 35 | 56 |
| BS835 | 57 | 14 | 25 | 35 |

|       |    |    |    |    |
|-------|----|----|----|----|
| BS836 | 67 | 14 | 28 | 51 |
| BS837 | 67 | 14 | 27 | 55 |
| BS838 | 67 | 14 | 11 | 35 |
| BS839 | 67 | 14 | 20 | 53 |
| BS840 | 67 | 14 | 46 | 56 |
| BS841 | 67 | 14 | 29 | 55 |
| BS842 | 57 | 14 | 27 | 52 |
| BS843 | 67 | 14 | 35 | 51 |
| BS844 | 67 | 14 | 28 | 51 |
| BS845 | 67 | 14 | 31 | 54 |
| BS846 | 67 | 14 | 11 | 27 |
| BS847 | 67 | 14 | 21 | 51 |
| BS848 | 67 | 14 | 25 | 56 |
| BS849 | 67 | 14 | 35 | 51 |
| BS850 | 57 | 14 | 24 | 51 |
| BS851 | 67 | 14 | 24 | 56 |
| BS852 | 67 | 14 | 27 | 56 |
| BS853 | 67 | 14 | 28 | 55 |
| BS854 | 67 | 14 | 27 | 56 |
| BS855 | 67 | 14 | 34 | 51 |
| BS856 | 67 | 14 | 11 | 27 |
| BS857 | 67 | 14 | 27 | 55 |
| BS858 | 67 | 14 | 27 | 52 |
| BS859 | 67 | 14 | 27 | 55 |
| BS860 | 57 | 14 | 31 | 51 |
| BS861 | 67 | 14 | 28 | 55 |
| BS862 | 67 | 14 | 24 | 56 |
| BS863 | 67 | 14 | 31 | 51 |
| BS864 | 67 | 14 | 11 | 28 |
| BS865 | 67 | 14 | 35 | 45 |
| BS866 | 57 | 14 | 27 | 55 |
| BS867 | 57 | 14 | 27 | 51 |
| BS868 | 67 | 14 | 11 | 35 |
| BS869 | 67 | 14 | 35 | 56 |
| BS870 | 67 | 14 | 35 | 56 |
| BS871 | 67 | 14 | 28 | 51 |
| BS872 | 57 | 14 | 27 | 51 |
| BS873 | 67 | 14 | 27 | 55 |
| BS874 | 57 | 14 | 28 | 43 |
| BS875 | 67 | 14 | 31 | 54 |

|       |    |    |    |    |
|-------|----|----|----|----|
| BS876 | 67 | 14 | 27 | 45 |
| BS877 | 67 | 14 | 28 | 51 |
| BS878 | 57 | 14 | 27 | 55 |
| BS879 | 67 | 14 | 27 | 51 |
| BS880 | 57 | 14 | 28 | 54 |
| BS881 | 67 | 14 | 35 | 56 |
| BS882 | 57 | 14 | 35 | 56 |
| BS883 | 67 | 14 | 27 | 51 |
| BS884 | 67 | 14 | 28 | 51 |
| BS885 | 67 | 14 | 27 | 55 |
| BS886 | 57 | 14 | 18 | 51 |
| BS887 | 67 | 14 | 35 | 56 |
| BS888 | 57 | 14 | 28 | 51 |
| BS889 | 67 | 14 | 31 | 54 |
| BS890 | 67 | 14 | 25 | 43 |
| BS891 | 67 | 14 | 24 | 54 |
| BS892 | 57 | 14 | 27 | 51 |
| BS893 | 67 | 14 | 27 | 55 |
| BS894 | 67 | 14 | 24 | 54 |
| BS895 | 57 | 14 | 35 | 51 |
| BS896 | 57 | 14 | 28 | 51 |
| BS897 | 67 | 14 | 27 | 45 |
| BS898 | 67 | 14 | 35 | 51 |
| BS899 | 67 | 14 | 27 | 45 |
| BS900 | 67 | 14 | 11 | 35 |
| BS901 | 67 | 14 | 11 | 28 |
| BS902 | 67 | 14 | 11 | 42 |
| BS903 | 67 | 14 | 28 | 46 |
| BS904 | 67 | 14 | 28 | 55 |
| BS905 | 67 | 14 | 11 | 28 |
| BS906 | 54 | 14 | 28 | 54 |
| BS907 | 67 | 14 | 42 | 54 |
| BS908 | 67 | 14 | 27 | 51 |
| BS909 | 67 | 14 | 11 | 35 |
| BS910 | 67 | 14 | 11 | 31 |
| BS911 | 67 | 14 | 20 | 35 |
| BS912 | 67 | 14 | 28 | 51 |
| BS913 | 67 | 14 | 35 | 51 |
| BS914 | 67 | 14 | 11 | 35 |
| BS915 | 67 | 14 | 11 | 35 |

|       |    |    |    |    |
|-------|----|----|----|----|
| BS916 | 67 | 14 | 35 | 51 |
| BS917 | 67 | 14 | 11 | 27 |
| BS918 | 67 | 14 | 11 | 31 |
| BS919 | 67 | 14 | 27 | 38 |
| BS920 | 57 | 14 | 28 | 42 |
| BS921 | 67 | 14 | 11 | 35 |
| BS922 | 54 | 14 | 24 | 54 |
| BS923 | 67 | 14 | 27 | 51 |
| BS924 | 67 | 14 | 28 | 51 |
| BS925 | 67 | 14 | 35 | 54 |
| BS926 | 67 | 14 | 27 | 56 |
| BS927 | 67 | 14 | 26 | 46 |
| BS928 | 67 | 14 | 35 | 56 |
| BS929 | 67 | 14 | 24 | 45 |
| BS930 | 67 | 14 | 35 | 56 |
| BS931 | 67 | 14 | 29 | 51 |
| BS932 | 67 | 14 | 27 | 55 |
| BS933 | 67 | 14 | 28 | 55 |
| BS934 | 67 | 14 | 31 | 49 |
| BS935 | 67 | 14 | 27 | 51 |
| BS936 | 67 | 14 | 18 | 45 |
| BS937 | 67 | 14 | 31 | 56 |
| BS938 | 67 | 14 | 11 | 28 |
| BS939 | 57 | 14 | 27 | 41 |
| BS940 | 67 | 14 | 35 | 56 |
| BS941 | 67 | 14 | 28 | 58 |
| BS942 | 67 | 14 | 21 | 51 |
| BS943 | 67 | 14 | 11 | 35 |
| BS944 | 67 | 14 | 11 | 35 |
| BS945 | 67 | 14 | 24 | 43 |
| BS946 | 67 | 14 | 27 | 55 |
| BS947 | 67 | 14 | 11 | 51 |
| BS948 | 67 | 14 | 11 | 27 |
| BS949 | 67 | 14 | 28 | 51 |
| BS950 | 67 | 14 | 35 | 54 |
| BS951 | 67 | 14 | 27 | 55 |
| BS952 | 67 | 14 | 11 | 35 |
| BS953 | 57 | 14 | 24 | 51 |
| BS954 | 57 | 14 | 35 | 56 |
| BS955 | 67 | 14 | 24 | 56 |

|       |    |    |    |    |
|-------|----|----|----|----|
| BS956 | 67 | 14 | 27 | 55 |
| BS957 | 67 | 14 | 29 | 51 |
| BS958 | 67 | 14 | 13 | 35 |
| BS959 | 67 | 14 | 28 | 55 |
| BS960 | 57 | 14 | 29 | 56 |
| BS961 | 67 | 14 | 25 | 35 |
| BS962 | 67 | 14 | 11 | 28 |
| BS963 | 57 | 14 | 27 | 55 |
| BS964 | 67 | 14 | 27 | 38 |
| BS965 | 67 | 14 | 30 | 54 |
| BS966 | 67 | 14 | 35 | 54 |
| BS967 | 57 | 14 | 24 | 51 |
| BS968 | 54 | 14 | 27 | 51 |
| BS969 | 67 | 14 | 27 | 51 |
| BS970 | 67 | 14 | 25 | 51 |
| BS971 | 57 | 14 | 23 | 55 |
| BS972 | 67 | 14 | 24 | 56 |
| BS973 | 67 | 14 | 29 | 55 |
| BS974 | 67 | 14 | 43 | 56 |
| BS975 | 67 | 14 | 20 | 40 |
| BS976 | 67 | 14 | 11 | 35 |
| BS977 | 57 | 14 | 28 | 55 |
| BS978 | 67 | 14 | 27 | 38 |
| BS979 | 67 | 14 | 31 | 51 |
| BS980 | 57 | 14 | 35 | 56 |
| BS981 | 67 | 14 | 24 | 51 |
| BS982 | 57 | 14 | 23 | 55 |
| BS983 | 67 | 14 | 24 | 56 |
| BS984 | 67 | 14 | 35 | 56 |
| BS985 | 67 | 14 | 27 | 56 |
| BS986 | 57 | 14 | 30 | 51 |
| BS987 | 67 | 14 | 11 | 31 |
| BS988 | 67 | 14 | 27 | 51 |
| BS989 | 67 | 14 | 11 | 27 |
| BS990 | 67 | 14 | 27 | 56 |
| BS991 | 67 | 14 | 35 | 56 |
| BS992 | 67 | 14 | 35 | 56 |
| BS993 | 67 | 14 | 35 | 51 |
| BS994 | 57 | 14 | 28 | 55 |
| BS995 | 67 | 14 | 24 | 54 |

|        |    |    |    |    |
|--------|----|----|----|----|
| BS996  | 67 | 14 | 35 | 51 |
| BS997  | 67 | 14 | 28 | 51 |
| BS998  | 67 | 14 | 29 | 51 |
| BS999  | 67 | 14 | 31 | 51 |
| BS1000 | 67 | 14 | 35 | 56 |

---

**Data S8.**

Information of all Himalayan species in our study. Molecular data collected by our study are highlighted by “This study”. “Strict rule” was applied in the analyses shown in the main text, in which “potential Himalayan species” were excluded. “Relax rule” refers to “potential Himalayan species” included.



| <b>Class</b> | <b>Family</b> | <b>Species</b>               | <b>Source</b>     | <b>Strict rule</b>      | <b>Relax rule</b>                 | <b>Notes</b>                                                                             |
|--------------|---------------|------------------------------|-------------------|-------------------------|-----------------------------------|------------------------------------------------------------------------------------------|
| Amphibian    | Bufo          | <i>Bufo gargarizans</i>      | Genbank           | Not in the Himalaya     | Widespread including the Himalaya | No sequences in the Himalaya provided ever, so the Himalayan distribution is problematic |
| Amphibian    | Bufo          | <i>Bufoides meghalayanus</i> | Genbank           | Endemic to the Himalaya | Endemic to the Himalaya           |                                                                                          |
| Amphibian    | Bufo          | <i>Bufo baturae</i>          | Genbank           | Endemic to the Himalaya | Endemic to the Himalaya           |                                                                                          |
| Amphibian    | Bufo          | <i>Bufo latastii</i>         | Genbank           | Endemic to the Himalaya | Endemic to the Himalaya           |                                                                                          |
| Amphibian    | Bufo          | <i>Bufo zamdaensis</i>       | <b>This study</b> | Endemic to the Himalaya | Endemic to the Himalaya           |                                                                                          |

|                     |                                   |                   |                                         |                                         |                                                                                                   |
|---------------------|-----------------------------------|-------------------|-----------------------------------------|-----------------------------------------|---------------------------------------------------------------------------------------------------|
| Amphibian Bufonidae | <i>Duttaphrynus himalayanus</i>   | <b>This study</b> | Himalaya<br>Endemic to the<br>Himalaya  | Himalaya<br>Endemic to the<br>Himalaya  |                                                                                                   |
| Amphibian Bufonidae | <i>Duttaphrynus melanostictus</i> | Genbank           | Widespread<br>including the<br>Himalaya | Widespread<br>including the<br>Himalaya | Combined with other<br>sequences outside the<br>Himalaya                                          |
| Amphibian Bufonidae | <i>Duttaphrynus stomaticus</i>    | Genbank           | Not in the<br>Himalaya                  | Widespread<br>including the<br>Himalaya | No sequences in the<br>Himalaya provided ever, so<br>the Himalayan distribution<br>is problematic |
| Amphibian Bufonidae | <i>Duttaphrynus stuarti</i>       | <b>This study</b> | Endemic to the<br>Himalaya              | Endemic to the<br>Himalaya              |                                                                                                   |
| Amphibian Bufonidae | <i>Ingerophrynus macrotis</i>     | Genbank           | Widespread                              | Widespread                              | Combined with other                                                                               |

|                             |                                 |                   |                         |                         |                                                    |
|-----------------------------|---------------------------------|-------------------|-------------------------|-------------------------|----------------------------------------------------|
| Amphibian Ceratobatrachidae | <i>Liurana alpina</i>           | Genbank           | including the Himalaya  | including the Himalaya  | sequences outside the Himalaya                     |
| Amphibian Ceratobatrachidae | <i>Liurana medogensis</i>       | Genbank           | Endemic to the Himalaya | Endemic to the Himalaya |                                                    |
| Amphibian Ceratobatrachidae | <i>Liurana valleculea</i>       | <b>This study</b> | Endemic to the Himalaya | Endemic to the Himalaya |                                                    |
| Amphibian Ceratobatrachidae | <i>Liurana xizangensis</i>      | Genbank           | Endemic to the Himalaya | Endemic to the Himalaya |                                                    |
| Amphibian Dicroglossidae    | <i>Euphlyctis cyanophlyctis</i> | Genbank           | Widespread              | Widespread              | Combined with other sequences outside the Himalaya |

|                          |                                 |         |                                   |                                   |                                                                                          |
|--------------------------|---------------------------------|---------|-----------------------------------|-----------------------------------|------------------------------------------------------------------------------------------|
| Amphibian Dicroglossidae | <i>Euphlyctis hexadactylus</i>  | Genbank | Not in the Himalaya               | Widespread including the Himalaya | No sequences in the Himalaya provided ever, so the Himalayan distribution is problematic |
| Amphibian Dicroglossidae | <i>Hoplobatrachus crassus</i>   | Genbank | Widespread including the Himalaya | Widespread including the Himalaya | Combined with other sequences outside the Himalaya                                       |
| Amphibian Dicroglossidae | <i>Hoplobatrachus tigerinus</i> | Genbank | Widespread including the Himalaya | Widespread including the Himalaya | Combined with other sequences outside the Himalaya                                       |
| Amphibian Dicroglossidae | <i>Ingerana borealis</i>        | Genbank | Endemic to the Himalaya           | Endemic to the Himalaya           |                                                                                          |
| Amphibian Dicroglossidae | <i>Minervarya pierrei</i>       | Genbank | Endemic to the Himalaya           | Endemic to the Himalaya           |                                                                                          |

|                          |                               |                   |                                    |                                                     |                                                                                                   |
|--------------------------|-------------------------------|-------------------|------------------------------------|-----------------------------------------------------|---------------------------------------------------------------------------------------------------|
| Amphibian Dicroglossidae | <i>Minervarya syhadrensis</i> | Genbank           | Himalaya<br>Not in the<br>Himalaya | Himalaya<br>Widespread<br>including the<br>Himalaya | No sequences in the<br>Himalaya provided ever, so<br>the Himalayan distribution<br>is problematic |
| Amphibian Dicroglossidae | <i>Nanorana arnoldi</i>       | Genbank           | Endemic to the<br>Himalaya         | Endemic to the<br>Himalaya                          |                                                                                                   |
| Amphibian Dicroglossidae | <i>Nanorana blanfordii</i>    | <b>This study</b> | Endemic to the<br>Himalaya         | Endemic to the<br>Himalaya                          |                                                                                                   |
| Amphibian Dicroglossidae | <i>Nanorana chayuensis</i>    | <b>This study</b> | Endemic to the<br>Himalaya         | Endemic to the<br>Himalaya                          |                                                                                                   |
| Amphibian Dicroglossidae | <i>Nanorana conaensis</i>     | Genbank           | Endemic to the<br>Himalaya         | Endemic to the<br>Himalaya                          |                                                                                                   |

|                          |                            |                   |                                   |                                   |                                                |
|--------------------------|----------------------------|-------------------|-----------------------------------|-----------------------------------|------------------------------------------------|
| Amphibian Dicroglossidae | <i>Nanorana liebigii</i>   | <b>This study</b> | Endemic to the Himalaya           | Endemic to the Himalaya           |                                                |
| Amphibian Dicroglossidae | <i>Nanorana medogensis</i> | Genbank           | Endemic to the Himalaya           | Endemic to the Himalaya           |                                                |
| Amphibian Dicroglossidae | <i>Nanorana parkeri</i>    | Genbank           | Widespread including the Himalaya | Widespread including the Himalaya |                                                |
| Amphibian Dicroglossidae | <i>Nanorana polunini</i>   | <b>This study</b> | Endemic to the Himalaya           | Endemic to the Himalaya           |                                                |
| Amphibian Dicroglossidae | <i>Nanorana rostandi</i>   | <b>This study</b> | Endemic to the Himalaya           | Endemic to the Himalaya           |                                                |
| Amphibian Dicroglossidae | <i>Occidozyga lima</i>     | Genbank           | Not in the Himalaya               | Widespread including the Himalaya | No sequences in the Himalaya provided ever, so |

|                          |                               |                   |                                   |                                   |                                                                                          |
|--------------------------|-------------------------------|-------------------|-----------------------------------|-----------------------------------|------------------------------------------------------------------------------------------|
|                          |                               |                   |                                   | Himalaya                          | the Himalayan distribution is problematic                                                |
| Amphibian Dicroglossidae | <i>Sphaerotheca breviceps</i> | Genbank           | Not in the Himalaya               | Widespread including the Himalaya | No sequences in the Himalaya provided ever, so the Himalayan distribution is problematic |
| Amphibian Dicroglossidae | <i>Sphaerotheca rolandae</i>  | Genbank           | Widespread including the Himalaya | Widespread including the Himalaya |                                                                                          |
| Amphibian Megophryidae   | <i>Leptobrachium bompu</i>    | <b>This study</b> | Endemic to the Himalaya           | Endemic to the Himalaya           |                                                                                          |
| Amphibian Megophryidae   | <i>Leptobrachium smithi</i>   | Genbank           | Not in the Himalaya               | Widespread including the Himalaya | No sequences in the Himalaya provided ever, so                                           |

|                        |                                |         |                         |                                   |                                                                                          |
|------------------------|--------------------------------|---------|-------------------------|-----------------------------------|------------------------------------------------------------------------------------------|
|                        |                                |         |                         | Himalaya                          | the Himalayan distribution is problematic                                                |
| Amphibian Megophryidae | <i>Megophrys ancaea</i>        | Genbank | Endemic to the Himalaya | Endemic to the Himalaya           |                                                                                          |
| Amphibian Megophryidae | <i>Megophrys flavipunctata</i> | Genbank | Endemic to the Himalaya | Endemic to the Himalaya           |                                                                                          |
| Amphibian Megophryidae | <i>Megophrys glandulosa</i>    | Genbank | Not in the Himalaya     | Widespread including the Himalaya | No sequences in the Himalaya provided ever, so the Himalayan distribution is problematic |
| Amphibian Megophryidae | <i>Megophrys himalayana</i>    | Genbank | Endemic to the Himalaya | Endemic to the Himalaya           |                                                                                          |
| Amphibian Megophryidae | <i>Megophrys major</i>         | Genbank | Widespread              | Widespread                        | Combined with other                                                                      |



|                        |                        |         | including the<br>Himalaya  | including the<br>Himalaya  | sequences outside the<br>Himalaya |
|------------------------|------------------------|---------|----------------------------|----------------------------|-----------------------------------|
| Amphibian Megophryidae | Megophrys medogensis   | Genbank | Endemic to the<br>Himalaya | Endemic to the<br>Himalaya |                                   |
| Amphibian Megophryidae | Megophrys megacephala  | Genbank | Endemic to the<br>Himalaya | Endemic to the<br>Himalaya |                                   |
| Amphibian Megophryidae | Megophrys oreocrypta   | Genbank | Endemic to the<br>Himalaya | Endemic to the<br>Himalaya |                                   |
| Amphibian Megophryidae | Megophrys oropedion    | Genbank | Endemic to the<br>Himalaya | Endemic to the<br>Himalaya |                                   |
| Amphibian Megophryidae | Megophrys pachyproctus | Genbank | Endemic to the<br>Himalaya | Endemic to the<br>Himalaya |                                   |

|                        |                                   |         |                         |                                   |                                                                                          |
|------------------------|-----------------------------------|---------|-------------------------|-----------------------------------|------------------------------------------------------------------------------------------|
| Amphibian Megophryidae | <i>Megophrys parva</i>            | Genbank | Not in the Himalaya     | Widespread including the Himalaya | No sequences in the Himalaya provided ever, so the Himalayan distribution is problematic |
| Amphibian Megophryidae | <i>Megophrys periosa</i>          | Genbank | Endemic to the Himalaya | Endemic to the Himalaya           |                                                                                          |
| Amphibian Megophryidae | <i>Megophrys robusta</i>          | Genbank | Endemic to the Himalaya | Endemic to the Himalaya           |                                                                                          |
| Amphibian Megophryidae | <i>Megophrys serchhipii</i>       | Genbank | Endemic to the Himalaya | Endemic to the Himalaya           |                                                                                          |
| Amphibian Megophryidae | <i>Megophrys vegrandis</i>        | Genbank | Endemic to the Himalaya | Endemic to the Himalaya           |                                                                                          |
| Amphibian Megophryidae | <i>Megophrys wuliangshanensis</i> | Genbank | Not in the Himalaya     | Widespread                        | No sequences in the Himalaya provided ever, so the Himalayan distribution is problematic |

|                        |                         |         |                         |                         |                                                                      |
|------------------------|-------------------------|---------|-------------------------|-------------------------|----------------------------------------------------------------------|
|                        |                         |         | Himalaya                | including the Himalaya  | Himalaya provided ever, so the Himalayan distribution is problematic |
| Amphibian Megophryidae | Megophrys zhangi        | Genbank | Endemic to the Himalaya | Endemic to the Himalaya |                                                                      |
| Amphibian Megophryidae | Megophrys zunhebotensis | Genbank | Endemic to the Himalaya | Endemic to the Himalaya |                                                                      |
|                        |                         |         | Widespread              | Widespread              |                                                                      |
| Amphibian Megophryidae | Scutiger boulengeri     | Genbank | including the Himalaya  | including the Himalaya  |                                                                      |
|                        |                         |         |                         | Widespread              | No sequences in the                                                  |
| Amphibian Megophryidae | Scutiger mammatus       | Genbank | Not in the Himalaya     | including the Himalaya  | Himalaya provided ever, so the Himalayan distribution                |

is problematic

|                        |                        |                   |                         |                         |
|------------------------|------------------------|-------------------|-------------------------|-------------------------|
| Amphibian Megophryidae | Scutiger nepalensis    | Genbank           | Endemic to the Himalaya | Endemic to the Himalaya |
| Amphibian Megophryidae | Scutiger nyingchiensis | <b>This study</b> | Endemic to the Himalaya | Endemic to the Himalaya |
| Amphibian Megophryidae | Scutiger occidentalis  | Genbank           | Endemic to the Himalaya | Endemic to the Himalaya |
| Amphibian Megophryidae | Scutiger sikkimensis   | Genbank           | Endemic to the Himalaya | Endemic to the Himalaya |
| Amphibian Megophryidae | Scutiger spinosus      | Genbank           | Endemic to the Himalaya | Endemic to the Himalaya |
| Amphibian Megophryidae | Scutiger wuguanfui     | <b>This study</b> | Endemic to the Himalaya | Endemic to the Himalaya |

|                   |                              |                   |                                        |                                        |
|-------------------|------------------------------|-------------------|----------------------------------------|----------------------------------------|
| Amphibian Ranidae | <i>Amolops aniqiaoensis</i>  | <b>This study</b> | Himalaya<br>Endemic to the<br>Himalaya | Himalaya<br>Endemic to the<br>Himalaya |
| Amphibian Ranidae | <i>Amolops chayuensis</i>    | <b>This study</b> | Himalaya<br>Endemic to the<br>Himalaya | Himalaya<br>Endemic to the<br>Himalaya |
| Amphibian Ranidae | <i>Amolops medogensis</i>    | <b>This study</b> | Himalaya<br>Endemic to the<br>Himalaya | Himalaya<br>Endemic to the<br>Himalaya |
| Amphibian Ranidae | <i>Amolops nyingchiensis</i> | <b>This study</b> | Himalaya<br>Endemic to the<br>Himalaya | Himalaya<br>Endemic to the<br>Himalaya |
| Amphibian Ranidae | <i>Amolops beibengensis</i>  | <b>This study</b> | Himalaya<br>Endemic to the<br>Himalaya | Himalaya<br>Endemic to the<br>Himalaya |
| Amphibian Ranidae | <i>Amolops deng</i>          | <b>This study</b> | Endemic to the                         | Endemic to the                         |

|                   |                                |                   |                                     |                                     |                                                                                          |
|-------------------|--------------------------------|-------------------|-------------------------------------|-------------------------------------|------------------------------------------------------------------------------------------|
| Amphibian Ranidae | <i>Amolops gyirongensis</i>    | <b>This study</b> | Himalaya<br>Endemic to the Himalaya | Himalaya<br>Endemic to the Himalaya |                                                                                          |
| Amphibian Ranidae | <i>Amolops</i> sp              | <b>This study</b> | Endemic to the Himalaya             | Endemic to the Himalaya             |                                                                                          |
| Amphibian Ranidae | <i>Amolops wangyufani</i>      | <b>This study</b> | Endemic to the Himalaya             | Endemic to the Himalaya             |                                                                                          |
| Amphibian Ranidae | <i>Amolops yarlungzangbo</i>   | <b>This study</b> | Endemic to the Himalaya             | Endemic to the Himalaya             |                                                                                          |
| Amphibian Ranidae | <i>Amolops viridimaculatus</i> | Genbank           | Not in the Himalaya                 | Widespread including the Himalaya   | No sequences in the Himalaya provided ever, so the Himalayan distribution is problematic |

|                   |                                |         |                                   |                                   |                                                                           |
|-------------------|--------------------------------|---------|-----------------------------------|-----------------------------------|---------------------------------------------------------------------------|
| Amphibian Ranidae | <i>Clinotarsus alticola</i>    | Genbank | Endemic to the Himalaya           | Endemic to the Himalaya           |                                                                           |
| Amphibian Ranidae | <i>Humerana humeralis</i>      | Genbank | Endemic to the Himalaya           | Endemic to the Himalaya           |                                                                           |
| Amphibian Ranidae | <i>Hydrophylax leptoglossa</i> | Genbank | Widespread including the Himalaya | Widespread including the Himalaya | Combined with other sequences outside the Himalaya                        |
| Amphibian Ranidae | <i>Hylarana tytleri</i>        | Genbank | Widespread including the Himalaya | Widespread including the Himalaya |                                                                           |
| Amphibian Ranidae | <i>Odorrana andersonii</i>     | Genbank | Not in the Himalaya               | Widespread including the Himalaya | No sequences in the Himalaya provided ever, so the Himalayan distribution |

|                         |                               |         |                                   |                                   |                                                                                          |
|-------------------------|-------------------------------|---------|-----------------------------------|-----------------------------------|------------------------------------------------------------------------------------------|
| Amphibian Ranidae       | <i>Odorrana chloronota</i>    | Genbank | Widespread including the Himalaya | Widespread including the Himalaya | Combined with other sequences outside the Himalaya                                       |
| Amphibian Ranidae       | <i>Odorrana livida</i>        | Genbank | Not in the Himalaya               | Widespread including the Himalaya | No sequences in the Himalaya provided ever, so the Himalayan distribution is problematic |
| Amphibian Ranidae       | <i>Sylvirana nigrovittata</i> | Genbank | Widespread including the Himalaya | Widespread including the Himalaya | Combined with other sequences outside the Himalaya                                       |
| Amphibian Rhacophoridae | <i>Chiromantis doriae</i>     | Genbank | Not in the Himalaya               | Widespread including the Himalaya | No sequences in the Himalaya provided ever, so                                           |



|                         |                                  |                   |                                   |                                   |                                                                                          |
|-------------------------|----------------------------------|-------------------|-----------------------------------|-----------------------------------|------------------------------------------------------------------------------------------|
| Amphibian Rhacophoridae | <i>Chiromantis nongkhorensis</i> | Genbank           | Not in the Himalaya               | Himalaya                          | the Himalayan distribution is problematic                                                |
| Amphibian Rhacophoridae | <i>Chiromantis nongkhorensis</i> | Genbank           | Not in the Himalaya               | Widespread including the Himalaya | No sequences in the Himalaya provided ever, so the Himalayan distribution is problematic |
| Amphibian Rhacophoridae | <i>Feihyla vittata</i>           | <b>This study</b> | Widespread including the Himalaya | Widespread including the Himalaya | Combined with other sequences outside the Himalaya                                       |
| Amphibian Rhacophoridae | <i>Gracixalus medogensis</i>     | <b>This study</b> | Endemic to the Himalaya           | Endemic to the Himalaya           |                                                                                          |
| Amphibian Rhacophoridae | <i>Kurixalus appendiculatus</i>  | Genbank           | Not in the Himalaya               | Widespread including the Himalaya | No sequences in the Himalaya provided ever, so                                           |

|                         |                         |                   |                         |                                   |                                                                                          |
|-------------------------|-------------------------|-------------------|-------------------------|-----------------------------------|------------------------------------------------------------------------------------------|
|                         |                         |                   |                         | Himalaya                          | the Himalayan distribution is problematic                                                |
| Amphibian Rhacophoridae | Kurixalus naso          | <b>This study</b> | Endemic to the Himalaya | Endemic to the Himalaya           |                                                                                          |
| Amphibian Rhacophoridae | Nasutixalus jerdonii    | Genbank           | Endemic to the Himalaya | Endemic to the Himalaya           |                                                                                          |
| Amphibian Rhacophoridae | Nasutixalus medogensis  | Genbank           | Endemic to the Himalaya | Endemic to the Himalaya           |                                                                                          |
| Amphibian Rhacophoridae | Polypedates leucomystax | Genbank           | Not in the Himalaya     | Widespread including the Himalaya | No sequences in the Himalaya provided ever, so the Himalayan distribution is problematic |
| Amphibian Rhacophoridae | Polypedates maculatus   | Genbank           | Not in the Himalaya     | Widespread                        | No sequences in the Himalaya provided ever, so the Himalayan distribution is problematic |

|                         |                          |                   |                                   |                                   |                                                                                          |
|-------------------------|--------------------------|-------------------|-----------------------------------|-----------------------------------|------------------------------------------------------------------------------------------|
|                         |                          |                   | Himalaya                          | including the Himalaya            | Himalaya provided ever, so the Himalayan distribution is problematic                     |
| Amphibian Rhacophoridae | Polypedates megacephalus | <b>This study</b> | Widespread including the Himalaya | Widespread including the Himalaya | Combined with other sequences outside the Himalaya                                       |
| Amphibian Rhacophoridae | Polypedates teraiensis   | Genbank           | Endemic to the Himalaya           | Endemic to the Himalaya           |                                                                                          |
| Amphibian Rhacophoridae | Raorchestes parvulus     | <b>This study</b> | Not in the Himalaya               | Widespread including the Himalaya | No sequences in the Himalaya provided ever, so the Himalayan distribution is problematic |
| Amphibian Rhacophoridae | Rhacophorus bipunctatus  | <b>This study</b> | Widespread                        | Widespread                        |                                                                                          |

|                         |                           |                   |                            |                                         |                                                                                                   |
|-------------------------|---------------------------|-------------------|----------------------------|-----------------------------------------|---------------------------------------------------------------------------------------------------|
|                         |                           |                   | including the<br>Himalaya  | including the<br>Himalaya               |                                                                                                   |
|                         |                           |                   | Widespread                 | Widespread                              |                                                                                                   |
| Amphibian Rhacophoridae | Rhacophorus burmanus      | <b>This study</b> | including the<br>Himalaya  | including the<br>Himalaya               |                                                                                                   |
|                         |                           |                   |                            |                                         |                                                                                                   |
| Amphibian Rhacophoridae | Rhacophorus rhodopus      | Genbank           | Not in the<br>Himalaya     | Widespread<br>including the<br>Himalaya | No sequences in the<br>Himalaya provided ever, so<br>the Himalayan distribution<br>is problematic |
|                         |                           |                   |                            |                                         |                                                                                                   |
| Amphibian Rhacophoridae | Rhacophorus smaragdinus   | Genbank           | Endemic to the<br>Himalaya | Endemic to the<br>Himalaya              |                                                                                                   |
|                         |                           |                   |                            |                                         |                                                                                                   |
| Amphibian Rhacophoridae | Rhacophorus translineatus | <b>This study</b> | Endemic to the<br>Himalaya | Endemic to the<br>Himalaya              |                                                                                                   |

|           |               |                          |                   |                         |                                   |                                                |
|-----------|---------------|--------------------------|-------------------|-------------------------|-----------------------------------|------------------------------------------------|
| Amphibian | Rhacophoridae | Rhacophorus tuberculatus | <b>This study</b> | Endemic to the Himalaya | Endemic to the Himalaya           |                                                |
| Amphibian | Rhacophoridae | Theلودerma baibungense   | <b>This study</b> | Endemic to the Himalaya | Endemic to the Himalaya           |                                                |
| Amphibian | Rhacophoridae | Theلودerma moloch        | <b>This study</b> | Endemic to the Himalaya | Endemic to the Himalaya           |                                                |
| Amphibian | Rhacophoridae | Theلودerma pyaukkya      | Genbank           | Endemic to the Himalaya | Endemic to the Himalaya           |                                                |
| Reptile   | Agamidae      | Calotes emma             | Genbank           | Not in the Himalaya     | Widespread including the Himalaya |                                                |
| Reptile   | Agamidae      | Calotes jerdoni          | Genbank           | Not in the Himalaya     | Widespread including the Himalaya | No sequences in the Himalaya provided ever, so |

|         |          |                    |                   |                         |                                   |                                                                                          |
|---------|----------|--------------------|-------------------|-------------------------|-----------------------------------|------------------------------------------------------------------------------------------|
|         |          |                    |                   |                         | Himalaya                          | the Himalayan distribution is problematic                                                |
| Reptile | Agamidae | Calotes medogensis | <b>This study</b> | Endemic to the Himalaya | Endemic to the Himalaya           |                                                                                          |
| Reptile | Agamidae | Calotes minor      | Genbank           | Not in the Himalaya     | Widespread including the Himalaya | No sequences in the Himalaya provided ever, so the Himalayan distribution is problematic |
| Reptile | Agamidae | Calotes mystaceus  | Genbank           | Not in the Himalaya     | Widespread including the Himalaya |                                                                                          |
| Reptile | Agamidae | Calotes versicolor | Genbank           | Not in the Himalaya     | Widespread including the Himalaya | No sequences in the Himalaya provided ever, so                                           |

|         |          |                                 |         |                                   |                                   |                                                    |
|---------|----------|---------------------------------|---------|-----------------------------------|-----------------------------------|----------------------------------------------------|
|         |          |                                 |         |                                   | Himalaya                          | the Himalayan distribution is problematic          |
| Reptile | Agamidae | <i>Cristidorsa otai</i>         | Genbank | Endemic to the Himalaya           | Endemic to the Himalaya           |                                                    |
| Reptile | Agamidae | <i>Cristidorsa planidorsata</i> | Genbank | Endemic to the Himalaya           | Endemic to the Himalaya           |                                                    |
| Reptile | Agamidae | <i>Draco maculatus</i>          | Genbank | Widespread including the Himalaya | Widespread including the Himalaya | Combined with other sequences outside the Himalaya |
| Reptile | Agamidae | <i>Japalura andersoniana</i>    | Genbank | Endemic to the Himalaya           | Endemic to the Himalaya           |                                                    |
| Reptile | Agamidae | <i>Japalura kumaonensis</i>     | Genbank | Endemic to the Himalaya           | Endemic to the Himalaya           |                                                    |

|         |          |                             |         |                         |                                   |                                                                                          |
|---------|----------|-----------------------------|---------|-------------------------|-----------------------------------|------------------------------------------------------------------------------------------|
| Reptile | Agamidae | <i>Japalura tricarinata</i> | Genbank | Endemic to the Himalaya | Endemic to the Himalaya           |                                                                                          |
| Reptile | Agamidae | <i>Japalura variegata</i>   | Genbank | Endemic to the Himalaya | Endemic to the Himalaya           |                                                                                          |
| Reptile | Agamidae | <i>Laudakia melanura</i>    | Genbank | Not in the Himalaya     | Widespread including the Himalaya | No sequences in the Himalaya provided ever, so the Himalayan distribution is problematic |
| Reptile | Agamidae | <i>Laudakia papenfussi</i>  | Genbank | Endemic to the Himalaya | Endemic to the Himalaya           |                                                                                          |
| Reptile | Agamidae | <i>Laudakia tuberculata</i> | Genbank | Endemic to the Himalaya | Endemic to the Himalaya           |                                                                                          |
| Reptile | Agamidae | <i>Laudakia wui</i>         | Genbank | Endemic to the Himalaya | Endemic to the Himalaya           |                                                                                          |



|         |          |                                   |                   |                                 |                                               |                                                                                          |
|---------|----------|-----------------------------------|-------------------|---------------------------------|-----------------------------------------------|------------------------------------------------------------------------------------------|
| Reptile | Agamidae | <i>Paralaudakia himalayana</i>    | Genbank           | Himalaya<br>Not in the Himalaya | Himalaya<br>Widespread including the Himalaya | No sequences in the Himalaya provided ever, so the Himalayan distribution is problematic |
| Reptile | Agamidae | <i>Phrynocephalus reticulatus</i> | Genbank           | Not in the Himalaya             | Widespread including the Himalaya             | No sequences in the Himalaya provided ever, so the Himalayan distribution is problematic |
| Reptile | Agamidae | <i>Phrynocephalus theobaldi</i>   | Genbank           | Endemic to the Himalaya         | Endemic to the Himalaya                       |                                                                                          |
| Reptile | Agamidae | <i>Pseudocalotes austeniana</i>   | <b>This study</b> | Endemic to the Himalaya         | Endemic to the Himalaya                       |                                                                                          |

|         |            |                             |                   |                                   |                                   |                                                                                          |
|---------|------------|-----------------------------|-------------------|-----------------------------------|-----------------------------------|------------------------------------------------------------------------------------------|
| Reptile | Agamidae   | <i>Ptyctolaemus gularis</i> | <b>This study</b> | Endemic to the Himalaya           | Endemic to the Himalaya           |                                                                                          |
| Reptile | Agamidae   | <i>Sitana ponticeriana</i>  | Genbank           | Not in the Himalaya               | Widespread including the Himalaya | No sequences in the Himalaya provided ever, so the Himalayan distribution is problematic |
| Reptile | Agamidae   | <i>Sitana sivalensis</i>    | Genbank           | Endemic to the Himalaya           | Endemic to the Himalaya           |                                                                                          |
| Reptile | Anguidae   | <i>Dopasia gracilis</i>     | <b>This study</b> | Widespread including the Himalaya | Widespread including the Himalaya | Combined with other sequences outside the Himalaya                                       |
| Reptile | Colubridae | <i>Ahaetulla nasuta</i>     | Genbank           | Not in the Himalaya               | Widespread including the Himalaya | No sequences in the Himalaya provided ever, so                                           |

|         |            |                           |         |                     |                                   |                                                                                          |
|---------|------------|---------------------------|---------|---------------------|-----------------------------------|------------------------------------------------------------------------------------------|
| Reptile | Colubridae | <i>Ahaetulla prasina</i>  | Genbank | Not in the Himalaya | Himalaya                          | the Himalayan distribution is problematic                                                |
| Reptile | Colubridae | <i>Amphiesma stolatum</i> | Genbank | Not in the Himalaya | Widespread including the Himalaya | No sequences in the Himalaya provided ever, so the Himalayan distribution is problematic |
| Reptile | Colubridae | <i>Archelaphe bella</i>   | Genbank | Not in the Himalaya | Widespread including the Himalaya | No sequences in the Himalaya provided ever, so the Himalayan distribution                |

|         |            |                              |         |                     |                                   |                                                                                          |
|---------|------------|------------------------------|---------|---------------------|-----------------------------------|------------------------------------------------------------------------------------------|
| Reptile | Colubridae | <i>Boiga forsteni</i>        | Genbank | Not in the Himalaya | Widespread including the Himalaya | No sequences in the Himalaya provided ever, so the Himalayan distribution is problematic |
| Reptile | Colubridae | <i>Boiga trigonata</i>       | Genbank | Not in the Himalaya | Widespread including the Himalaya | No sequences in the Himalaya provided ever, so the Himalayan distribution is problematic |
| Reptile | Colubridae | <i>Calamaria pavementata</i> | Genbank | Not in the Himalaya | Widespread including the Himalaya | No sequences in the Himalaya provided ever, so the Himalayan distribution is problematic |

|         |            |                           |                   |                                   |                                   |                                                                                          |
|---------|------------|---------------------------|-------------------|-----------------------------------|-----------------------------------|------------------------------------------------------------------------------------------|
| Reptile | Colubridae | Coelognathus helena       | Genbank           | Not in the Himalaya               | Widespread including the Himalaya | No sequences in the Himalaya provided ever, so the Himalayan distribution is problematic |
| Reptile | Colubridae | Coelognathus radiatus     | Genbank           | Not in the Himalaya               | Widespread including the Himalaya | No sequences in the Himalaya provided ever, so the Himalayan distribution is problematic |
| Reptile | Colubridae | Dendrelaphis cyanochloris | <b>This study</b> | Widespread including the Himalaya | Widespread including the Himalaya |                                                                                          |
| Reptile | Colubridae | Dendrelaphis pictus       | Genbank           | Not in the Himalaya               | Widespread including the Himalaya | No sequences in the Himalaya provided ever, so                                           |

|         |            |                              |                   |                                   |                                   |                                                                                          |
|---------|------------|------------------------------|-------------------|-----------------------------------|-----------------------------------|------------------------------------------------------------------------------------------|
|         |            |                              |                   |                                   | Himalaya                          | the Himalayan distribution is problematic                                                |
| Reptile | Colubridae | <i>Elaphe cantoris</i>       | <b>This study</b> | Endemic to the Himalaya           | Endemic to the Himalaya           |                                                                                          |
| Reptile | Colubridae | <i>Elaphe hodgsoni</i>       | Genbank           | Endemic to the Himalaya           | Endemic to the Himalaya           |                                                                                          |
| Reptile | Colubridae | <i>Elaphe taeniura</i>       | Genbank           | Widespread including the Himalaya | Widespread including the Himalaya | Combined with other sequences outside the Himalaya                                       |
| Reptile | Colubridae | <i>Fowlea flavipunctatus</i> | Genbank           | Not in the Himalaya               | Widespread including the Himalaya | No sequences in the Himalaya provided ever, so the Himalayan distribution is problematic |

|         |            |                                |         |                                   |                                   |                                                                                          |
|---------|------------|--------------------------------|---------|-----------------------------------|-----------------------------------|------------------------------------------------------------------------------------------|
| Reptile | Colubridae | <i>Fowlea piscator</i>         | Genbank | Widespread including the Himalaya | Widespread including the Himalaya | Combined with other sequences outside the Himalaya                                       |
| Reptile | Colubridae | <i>Fowlea schnurrenbergeri</i> | Genbank | Widespread including the Himalaya | Widespread including the Himalaya |                                                                                          |
| Reptile | Colubridae | <i>Gonyosoma frenatum</i>      | Genbank | Not in the Himalaya               | Widespread including the Himalaya | No sequences in the Himalaya provided ever, so the Himalayan distribution is problematic |
| Reptile | Colubridae | <i>Gonyosoma prasinum</i>      | Genbank | Not in the Himalaya               | Widespread including the Himalaya | No sequences in the Himalaya provided ever, so the Himalayan distribution                |

|         |            |                              |                   |                          |                                   |                                                                                          |
|---------|------------|------------------------------|-------------------|--------------------------|-----------------------------------|------------------------------------------------------------------------------------------|
|         |            |                              |                   |                          |                                   | is problematic                                                                           |
| Reptile | Colubridae | <i>Hebius parallelum</i>     | <b>This study</b> | Endemic to the Himalaya  | Endemic to the Himalaya           |                                                                                          |
| Reptile | Colubridae | <i>Herpetoreas burbrinki</i> | Genbank           | Endemic to the Himalaya  | Endemic to the Himalaya           |                                                                                          |
| Reptile | Colubridae | <i>Herpetoreas platyceps</i> | <b>This study</b> | Endemic to the Himalaya  | Endemic to the Himalaya           |                                                                                          |
| Reptile | Colubridae | <i>Lycodon aulicus</i>       | Genbank           | Not in the Himalaya      | Widespread including the Himalaya | No sequences in the Himalaya provided ever, so the Himalayan distribution is problematic |
| Reptile | Colubridae | <i>Lycodon fasciatus</i>     | <b>This study</b> | Widespread including the | Widespread including the          |                                                                                          |



|         |            |                                |                   |                            |                            |                                                                            |
|---------|------------|--------------------------------|-------------------|----------------------------|----------------------------|----------------------------------------------------------------------------|
|         |            |                                |                   | Himalaya                   | Himalaya                   |                                                                            |
|         |            |                                |                   | Widespread                 | Widespread                 |                                                                            |
| Reptile | Colubridae | <i>Lycodon jara</i>            | Genbank           | including the<br>Himalaya  | including the<br>Himalaya  |                                                                            |
|         |            |                                |                   | Widespread                 | Widespread                 |                                                                            |
| Reptile | Colubridae | <i>Lycodon septentrionalis</i> | <b>This study</b> | including the<br>Himalaya  | including the<br>Himalaya  |                                                                            |
|         |            |                                |                   | Endemic to the<br>Himalaya | Endemic to the<br>Himalaya |                                                                            |
| Reptile | Colubridae | <i>Lycodon zawi</i>            | Genbank           | Endemic to the<br>Himalaya | Endemic to the<br>Himalaya |                                                                            |
|         |            |                                |                   |                            | Widespread                 | No sequences in the                                                        |
| Reptile | Colubridae | <i>Oligodon cinereus</i>       | Genbank           | Not in the<br>Himalaya     | including the<br>Himalaya  | Himalaya provided ever, so<br>the Himalayan distribution<br>is problematic |

|         |            |                                    |                   |                         |                                   |                                                                                          |
|---------|------------|------------------------------------|-------------------|-------------------------|-----------------------------------|------------------------------------------------------------------------------------------|
| Reptile | Colubridae | <i>Oligodon cyclurus</i>           | Genbank           | Not in the Himalaya     | Widespread including the Himalaya | No sequences in the Himalaya provided ever, so the Himalayan distribution is problematic |
| Reptile | Colubridae | <i>Oligodon lipipengi</i>          | <b>This study</b> | Endemic to the Himalaya | Endemic to the Himalaya           |                                                                                          |
| Reptile | Colubridae | <i>Oligodon theobaldi</i>          | Genbank           | Not in the Himalaya     | Widespread including the Himalaya | No sequences in the Himalaya provided ever, so the Himalayan distribution is problematic |
| Reptile | Colubridae | <i>Oligodon torquatus</i>          | Genbank           | Endemic to the Himalaya | Endemic to the Himalaya           |                                                                                          |
| Reptile | Colubridae | <i>Oreocryptophis porphyraceus</i> | Genbank           | Widespread              | Widespread                        | Combined with other                                                                      |

|         |            |                       |                   |                           |                           |                                   |
|---------|------------|-----------------------|-------------------|---------------------------|---------------------------|-----------------------------------|
|         |            |                       |                   | including the<br>Himalaya | including the<br>Himalaya | sequences outside the<br>Himalaya |
|         |            |                       |                   | Widespread                | Widespread                | Combined with other               |
| Reptile | Colubridae | Pseudoxenodon macrops | Genbank           | including the<br>Himalaya | including the<br>Himalaya | sequences outside the<br>Himalaya |
|         |            |                       |                   |                           | Widespread                |                                   |
| Reptile | Colubridae | Ptyas korros          | Genbank           | Not in the<br>Himalaya    | including the<br>Himalaya |                                   |
|         |            |                       |                   | Widespread                | Widespread                | Combined with other               |
| Reptile | Colubridae | Ptyas mucosa          | Genbank           | including the<br>Himalaya | including the<br>Himalaya | sequences outside the<br>Himalaya |
|         |            |                       |                   | Widespread                | Widespread                |                                   |
| Reptile | Colubridae | Ptyas nigromarginata  | <b>This study</b> | including the             | including the             |                                   |

|         |            |                               |                   |                                         |                                         |                                                                                                   |
|---------|------------|-------------------------------|-------------------|-----------------------------------------|-----------------------------------------|---------------------------------------------------------------------------------------------------|
| Reptile | Colubridae | <i>Rhabdophis himalayanus</i> | Genbank           | Himalaya<br>Endemic to the<br>Himalaya  | Himalaya<br>Endemic to the<br>Himalaya  |                                                                                                   |
| Reptile | Colubridae | <i>Rhabdophis leonardi</i>    | <b>This study</b> | Widespread<br>including the<br>Himalaya | Widespread<br>including the<br>Himalaya |                                                                                                   |
| Reptile | Colubridae | <i>Rhabdophis nuchalis</i>    | Genbank           | Not in the<br>Himalaya                  | Widespread<br>including the<br>Himalaya | No sequences in the<br>Himalaya provided ever, so<br>the Himalayan distribution<br>is problematic |
| Reptile | Colubridae | <i>Rhabdophis subminiatus</i> | Genbank           | Widespread<br>including the<br>Himalaya | Widespread<br>including the<br>Himalaya | Combined with other<br>sequences outside the<br>Himalaya                                          |

|         |            |                               |                   |                                   |                                   |                                                    |
|---------|------------|-------------------------------|-------------------|-----------------------------------|-----------------------------------|----------------------------------------------------|
| Reptile | Colubridae | <i>Sibynophis collaris</i>    | Genbank           | Widespread including the Himalaya | Widespread including the Himalaya | Combined with other sequences outside the Himalaya |
| Reptile | Colubridae | <i>Trachischium guentheri</i> | <b>This study</b> | Endemic to the Himalaya           | Endemic to the Himalaya           |                                                    |
| Reptile | Colubridae | <i>Trachischium monticola</i> | <b>This study</b> | Endemic to the Himalaya           | Endemic to the Himalaya           |                                                    |
| Reptile | Colubridae | <i>Trachischium tenuiceps</i> | <b>This study</b> | Endemic to the Himalaya           | Endemic to the Himalaya           |                                                    |
| Reptile | Elapidae   | <i>Bungarus bungaroides</i>   | Genbank           | Widespread including the Himalaya | Widespread including the Himalaya |                                                    |
| Reptile | Elapidae   | <i>Bungarus caeruleus</i>     | Genbank           | Widespread                        | Widespread                        |                                                    |

|         |          |                    |                   |                                   |                                   |                         |                                                                                          |
|---------|----------|--------------------|-------------------|-----------------------------------|-----------------------------------|-------------------------|------------------------------------------------------------------------------------------|
| Reptile | Elapidae | Bungarus fasciatus | Genbank           | including the Himalaya            | including the Himalaya            | Widespread              |                                                                                          |
| Reptile | Elapidae | Bungarus niger     | Genbank           | Not in the Himalaya               | including the Himalaya            | Endemic to the Himalaya |                                                                                          |
| Reptile | Elapidae | Naja kaouthia      | <b>This study</b> | Endemic to the Himalaya           | Endemic to the Himalaya           | Widespread              | No sequences in the Himalaya provided ever, so the Himalayan distribution is problematic |
| Reptile | Elapidae | Naja naja          | Genbank           | Widespread including the Himalaya | Widespread including the Himalaya | Widespread              | Combined with other sequences outside the Himalaya                                       |

|         |            |                                  |                   |                            |                            |                                                                            |
|---------|------------|----------------------------------|-------------------|----------------------------|----------------------------|----------------------------------------------------------------------------|
|         |            |                                  |                   | Himalaya                   | Himalaya                   | Himalaya                                                                   |
|         |            |                                  |                   | Widespread                 | Widespread                 |                                                                            |
| Reptile | Elapidae   | <i>Ophiophagus hannah</i>        | Genbank           | including the<br>Himalaya  | including the<br>Himalaya  |                                                                            |
|         |            |                                  |                   |                            | Widespread                 | No sequences in the                                                        |
| Reptile | Elapidae   | <i>Sinomicrurus macclellandi</i> | Genbank           | Not in the<br>Himalaya     | including the<br>Himalaya  | Himalaya provided ever, so<br>the Himalayan distribution<br>is problematic |
| Reptile | Gekkonidae | <i>Altiphylax levitoni</i>       | Genbank           | Endemic to the<br>Himalaya | Endemic to the<br>Himalaya |                                                                            |
| Reptile | Gekkonidae | <i>Altiphylax medogensis</i>     | <b>This study</b> | Endemic to the<br>Himalaya | Endemic to the<br>Himalaya |                                                                            |
| Reptile | Gekkonidae | <i>Altiphylax stolickzai</i>     | Genbank           | Widespread                 | Widespread                 |                                                                            |

|         |            |                                      |                   |                            |                            |                                   |
|---------|------------|--------------------------------------|-------------------|----------------------------|----------------------------|-----------------------------------|
|         |            |                                      |                   | including the<br>Himalaya  | including the<br>Himalaya  |                                   |
|         |            |                                      |                   | Widespread                 | Widespread                 | Combined with other               |
| Reptile | Gekkonidae | <i>Cyrtodactylus ayeyarwadyensis</i> | Genbank           | including the<br>Himalaya  | including the<br>Himalaya  | sequences outside the<br>Himalaya |
| Reptile | Gekkonidae | <i>Cyrtodactylus battalensis</i>     | Genbank           | Endemic to the<br>Himalaya | Endemic to the<br>Himalaya |                                   |
| Reptile | Gekkonidae | <i>Cyrtodactylus cayuensis</i>       | <b>This study</b> | Endemic to the<br>Himalaya | Endemic to the<br>Himalaya |                                   |
| Reptile | Gekkonidae | <i>Cyrtodactylus chamba</i>          | Genbank           | Endemic to the<br>Himalaya | Endemic to the<br>Himalaya |                                   |
| Reptile | Gekkonidae | <i>Cyrtodactylus fasciolatus</i>     | Genbank           | Endemic to the<br>Himalaya | Endemic to the<br>Himalaya |                                   |



|         |            |                                     |         |                            |                            |
|---------|------------|-------------------------------------|---------|----------------------------|----------------------------|
| Reptile | Gekkonidae | <i>Cyrtodactylus gubernatoris</i>   | Genbank | Endemic to the<br>Himalaya | Endemic to the<br>Himalaya |
| Reptile | Gekkonidae | <i>Cyrtodactylus guwahatiensis</i>  | Genbank | Endemic to the<br>Himalaya | Endemic to the<br>Himalaya |
| Reptile | Gekkonidae | <i>Cyrtodactylus himalayanus</i>    | Genbank | Endemic to the<br>Himalaya | Endemic to the<br>Himalaya |
| Reptile | Gekkonidae | <i>Cyrtodactylus jaintiaensis</i>   | Genbank | Endemic to the<br>Himalaya | Endemic to the<br>Himalaya |
| Reptile | Gekkonidae | <i>Cyrtodactylus kazirangaensis</i> | Genbank | Endemic to the<br>Himalaya | Endemic to the<br>Himalaya |
| Reptile | Gekkonidae | <i>Cyrtodactylus khasiensis</i>     | Genbank | Endemic to the<br>Himalaya | Endemic to the<br>Himalaya |

|         |            |                                      |         |                         |                         |                                                               |
|---------|------------|--------------------------------------|---------|-------------------------|-------------------------|---------------------------------------------------------------|
| Reptile | Gekkonidae | <i>Cyrtodactylus lawderanus</i>      | Genbank | Endemic to the Himalaya | Endemic to the Himalaya |                                                               |
| Reptile | Gekkonidae | <i>Cyrtodactylus montanus</i>        | Genbank | Endemic to the Himalaya | Endemic to the Himalaya |                                                               |
| Reptile | Gekkonidae | <i>Cyrtodactylus nagalandensis</i>   | Genbank | Endemic to the Himalaya | Endemic to the Himalaya |                                                               |
| Reptile | Gekkonidae | <i>Cyrtodactylus russelli</i>        | Genbank | Endemic to the Himalaya | Endemic to the Himalaya |                                                               |
| Reptile | Gekkonidae | <i>Cyrtodactylus septentrionalis</i> | Genbank | Endemic to the Himalaya | Endemic to the Himalaya |                                                               |
| Reptile | Gekkonidae | <i>Cyrtodactylus</i> sp CHNG         | Genbank | Endemic to the Himalaya | Endemic to the Himalaya | Insights into Himalayan biogeography from geckos: A molecular |

|         |            |                           |         |                         |                         |                                                                                                                                                                                                                     |
|---------|------------|---------------------------|---------|-------------------------|-------------------------|---------------------------------------------------------------------------------------------------------------------------------------------------------------------------------------------------------------------|
| Reptile | Gekkonidae | Cyrtodactylus sp Glow     | Genbank | Endemic to the Himalaya | Endemic to the Himalaya | phylogeny of Cyrtodactylus (Squamata: Gekkonidae) Insights into Himalayan biogeography from geckos: A molecular phylogeny of Cyrtodactylus (Squamata: Gekkonidae) Insights into Himalayan biogeography from geckos: |
| Reptile | Gekkonidae | Cyrtodactylus sp Khellong | Genbank | Endemic to the Himalaya | Endemic to the Himalaya | A molecular phylogeny of Cyrtodactylus (Squamata: Gekkonidae) Insights into Himalayan biogeography from geckos:                                                                                                     |
| Reptile | Gekkonidae | Cyrtodactylus sp Mizoram  | Genbank | Endemic to the Himalaya | Endemic to the Himalaya | Insights into Himalayan biogeography from geckos:                                                                                                                                                                   |

|         |            |                                   |                   |                            |                            |                                                                                                                                                                 |
|---------|------------|-----------------------------------|-------------------|----------------------------|----------------------------|-----------------------------------------------------------------------------------------------------------------------------------------------------------------|
|         |            |                                   |                   | Himalaya                   | Himalaya                   | biogeography from geckos:<br>A molecular<br>phylogeny of <i>Cyrtodactylus</i><br>(Squamata: Gekkonidae)<br>Insights into Himalayan<br>biogeography from geckos: |
| Reptile | Gekkonidae | <i>Cyrtodactylus</i> sp Sikkim    | Genbank           | Endemic to the<br>Himalaya | Endemic to the<br>Himalaya | A molecular<br>phylogeny of <i>Cyrtodactylus</i><br>(Squamata: Gekkonidae)                                                                                      |
| Reptile | Gekkonidae | <i>Cyrtodactylus</i> tibetanus    | <b>This study</b> | Endemic to the<br>Himalaya | Endemic to the<br>Himalaya |                                                                                                                                                                 |
| Reptile | Gekkonidae | <i>Cyrtodactylus</i> tripuraensis | Genbank           | Endemic to the<br>Himalaya | Endemic to the<br>Himalaya |                                                                                                                                                                 |

|         |            |                                 |                   |                         |                                   |                                                                                          |
|---------|------------|---------------------------------|-------------------|-------------------------|-----------------------------------|------------------------------------------------------------------------------------------|
| Reptile | Gekkonidae | <i>Cyrtodactylus zhaoermii</i>  | <b>This study</b> | Endemic to the Himalaya | Endemic to the Himalaya           |                                                                                          |
| Reptile | Gekkonidae | <i>Cyrtopodion aravallensis</i> | Genbank           | Endemic to the Himalaya | Endemic to the Himalaya           |                                                                                          |
| Reptile | Gekkonidae | <i>Cyrtopodion mansarulus</i>   | Genbank           | Endemic to the Himalaya | Endemic to the Himalaya           |                                                                                          |
| Reptile | Gekkonidae | <i>Cyrtopodion scabrum</i>      | Genbank           | Not in the Himalaya     | Widespread including the Himalaya | No sequences in the Himalaya provided ever, so the Himalayan distribution is problematic |
| Reptile | Gekkonidae | <i>Gekko gecko</i>              | Genbank           | Not in the Himalaya     | Widespread including the Himalaya | No sequences in the Himalaya provided ever, so the Himalayan distribution                |

|         |            |                                |         |                     |                                   |                                                                                          |
|---------|------------|--------------------------------|---------|---------------------|-----------------------------------|------------------------------------------------------------------------------------------|
| Reptile | Gekkonidae | <i>Hemidactylus aquilonius</i> | Genbank | Not in the Himalaya | Widespread including the Himalaya | No sequences in the Himalaya provided ever, so the Himalayan distribution is problematic |
| Reptile | Gekkonidae | <i>Hemidactylus bowringii</i>  | Genbank | Not in the Himalaya | Widespread including the Himalaya | No sequences in the Himalaya provided ever, so the Himalayan distribution is problematic |
| Reptile | Gekkonidae | <i>Hemidactylus brookii</i>    | Genbank | Not in the Himalaya | Widespread including the Himalaya | No sequences in the Himalaya provided ever, so the Himalayan distribution is problematic |

|         |            |                                  |         |                                   |                                   |                                                                                          |
|---------|------------|----------------------------------|---------|-----------------------------------|-----------------------------------|------------------------------------------------------------------------------------------|
| Reptile | Gekkonidae | <i>Hemidactylus flaviviridis</i> | Genbank | Widespread including the Himalaya | Widespread including the Himalaya |                                                                                          |
| Reptile | Gekkonidae | <i>Hemidactylus frenatus</i>     | Genbank | Widespread including the Himalaya | Widespread including the Himalaya | Combined with other sequences outside the Himalaya                                       |
| Reptile | Gekkonidae | <i>Hemidactylus garnotii</i>     | Genbank | Not in the Himalaya               | Widespread including the Himalaya | No sequences in the Himalaya provided ever, so the Himalayan distribution is problematic |
| Reptile | Gekkonidae | <i>Hemidactylus imbricatus</i>   | Genbank | Widespread including the Himalaya | Widespread including the Himalaya |                                                                                          |

|         |            |                                |                   |                                   |                                   |                                                                                          |
|---------|------------|--------------------------------|-------------------|-----------------------------------|-----------------------------------|------------------------------------------------------------------------------------------|
| Reptile | Gekkonidae | Hemidactylus platyurus         | <b>This study</b> | Not in the Himalaya               | Widespread including the Himalaya | No sequences in the Himalaya provided ever, so the Himalayan distribution is problematic |
| Reptile | Gekkonidae | Hemiphyllodactylus zayuensis   | <b>This study</b> | Endemic to the Himalaya           | Endemic to the Himalaya           |                                                                                          |
| Reptile | Gekkonidae | Hemiphyllodactylus yunnanensis | Genbank           | Not in the Himalaya               | Widespread including the Himalaya | No sequences in the Himalaya provided ever, so the Himalayan distribution is problematic |
| Reptile | Pareidae   | Pareas monticola               | <b>This study</b> | Widespread including the Himalaya | Widespread including the Himalaya |                                                                                          |



|         |           |                                    |                   |                         |                                   |                                                                                          |
|---------|-----------|------------------------------------|-------------------|-------------------------|-----------------------------------|------------------------------------------------------------------------------------------|
| Reptile | Scincidae | <i>Ablepharus pannonicus</i>       | Genbank           | Not in the Himalaya     | Widespread including the Himalaya | No sequences in the Himalaya provided ever, so the Himalayan distribution is problematic |
| Reptile | Scincidae | <i>Asymblepharus nyingchiensis</i> | <b>This study</b> | Endemic to the Himalaya | Endemic to the Himalaya           |                                                                                          |
| Reptile | Scincidae | <i>Asymblepharus</i> sp            | <b>This study</b> | Endemic to the Himalaya | Endemic to the Himalaya           |                                                                                          |
| Reptile | Scincidae | <i>Asymblepharus medogensis</i>    | <b>This study</b> | Endemic to the Himalaya | Endemic to the Himalaya           |                                                                                          |
| Reptile | Scincidae | <i>Eumeces schneiderii</i>         | Genbank           | Not in the Himalaya     | Widespread including the Himalaya | No sequences in the Himalaya provided ever, so the Himalayan distribution                |

|         |           |                             |         |                                   |                                   |                                                                                          |
|---------|-----------|-----------------------------|---------|-----------------------------------|-----------------------------------|------------------------------------------------------------------------------------------|
| Reptile | Scincidae | <i>Eurylepis taeniolata</i> | Genbank | Not in the Himalaya               | Widespread including the Himalaya | No sequences in the Himalaya provided ever, so the Himalayan distribution is problematic |
| Reptile | Scincidae | <i>Eutropis carinata</i>    | Genbank | Widespread including the Himalaya | Widespread including the Himalaya | Combined with other sequences outside the Himalaya                                       |
| Reptile | Scincidae | <i>Eutropis dissimilis</i>  | Genbank | Widespread including the Himalaya | Widespread including the Himalaya |                                                                                          |
| Reptile | Scincidae | <i>Eutropis macularia</i>   | Genbank | Widespread including the Himalaya | Widespread including the Himalaya | Combined with other sequences outside the Himalaya                                       |

|         |           |                               |         |               |               |                            |
|---------|-----------|-------------------------------|---------|---------------|---------------|----------------------------|
|         |           |                               |         | Himalaya      | Himalaya      | Himalaya                   |
|         |           |                               |         | Widespread    | Widespread    | Combined with other        |
| Reptile | Scincidae | <i>Eutropis multifasciata</i> | Genbank | including the | including the | sequences outside the      |
|         |           |                               |         | Himalaya      | Himalaya      | Himalaya                   |
|         |           |                               |         | Widespread    | Widespread    | Combined with other        |
| Reptile | Scincidae | <i>Lygosoma albopunctatum</i> | Genbank | including the | including the | sequences outside the      |
|         |           |                               |         | Himalaya      | Himalaya      | Himalaya                   |
|         |           |                               |         |               | Widespread    | No sequences in the        |
| Reptile | Scincidae | <i>Lygosoma lineolatum</i>    | Genbank | Not in the    | including the | Himalaya provided ever, so |
|         |           |                               |         | Himalaya      | Himalaya      | the Himalayan distribution |
|         |           |                               |         |               |               | is problematic             |
| Reptile | Scincidae | <i>Lygosoma punctata</i>      | Genbank | Not in the    | Widespread    |                            |
|         |           |                               |         | Himalaya      | including the |                            |

|         |           |                                |                   |                                   |                                   |                                                                                          |
|---------|-----------|--------------------------------|-------------------|-----------------------------------|-----------------------------------|------------------------------------------------------------------------------------------|
|         |           |                                |                   |                                   | Himalaya                          |                                                                                          |
|         |           |                                |                   | Widespread                        | Widespread                        |                                                                                          |
| Reptile | Scincidae | <i>Scincella doriae</i>        | <b>This study</b> | including the Himalaya            | including the Himalaya            |                                                                                          |
|         |           |                                |                   |                                   |                                   | No sequences in the Himalaya provided ever, so the Himalayan distribution is problematic |
| Reptile | Scincidae | <i>Scincella reevesii</i>      | Genbank           | Not in the Himalaya               | Widespread including the Himalaya |                                                                                          |
|         |           |                                |                   |                                   |                                   | Combined with other sequences outside the Himalaya                                       |
| Reptile | Scincidae | <i>Sphenomorphus indicus</i>   | Genbank           | Widespread including the Himalaya | Widespread including the Himalaya |                                                                                          |
|         |           |                                |                   |                                   |                                   |                                                                                          |
| Reptile | Scincidae | <i>Sphenomorphus maculatus</i> | <b>This study</b> | Widespread including the Himalaya | Widespread including the Himalaya |                                                                                          |

|         |           |                             |         |                                    |                                                     |                                                                                                   |
|---------|-----------|-----------------------------|---------|------------------------------------|-----------------------------------------------------|---------------------------------------------------------------------------------------------------|
| Reptile | Viperidae | <i>Azemiops feae</i>        | Genbank | Himalaya<br>Not in the<br>Himalaya | Himalaya<br>Widespread<br>including the<br>Himalaya | No sequences in the<br>Himalaya provided ever, so<br>the Himalayan distribution<br>is problematic |
| Reptile | Viperidae | <i>Echis carinatus</i>      | Genbank | Not in the<br>Himalaya             | Widespread<br>including the<br>Himalaya             | No sequences in the<br>Himalaya provided ever, so<br>the Himalayan distribution<br>is problematic |
| Reptile | Viperidae | <i>Ovophis makazayazaya</i> | Genbank | Not in the<br>Himalaya             | Widespread<br>including the<br>Himalaya             | No sequences in the<br>Himalaya provided ever, so<br>the Himalayan distribution<br>is problematic |

|         |           |                                  |                   |                                   |                                   |
|---------|-----------|----------------------------------|-------------------|-----------------------------------|-----------------------------------|
| Reptile | Viperidae | <i>Ovophis monticola</i>         | <b>This study</b> | Widespread including the Himalaya | Widespread including the Himalaya |
| Reptile | Viperidae | <i>Ovophis zayuensis</i>         | <b>This study</b> | Endemic to the Himalaya           | Endemic to the Himalaya           |
| Reptile | Viperidae | <i>Protobothrops himalayanus</i> | <b>This study</b> | Endemic to the Himalaya           | Endemic to the Himalaya           |
| Reptile | Viperidae | <i>Protobothrops jerdonii</i>    | <b>This study</b> | Widespread including the Himalaya | Widespread including the Himalaya |
| Reptile | Viperidae | <i>Protobothrops kaulbacki</i>   | Genbank           | Widespread including the Himalaya | Widespread including the Himalaya |

|         |           |                                     |                   |                                   |                                   |                                                                                          |
|---------|-----------|-------------------------------------|-------------------|-----------------------------------|-----------------------------------|------------------------------------------------------------------------------------------|
| Reptile | Viperidae | <i>Protobothrops mucrosquamatus</i> | Genbank           | Not in the Himalaya               | Widespread including the Himalaya | No sequences in the Himalaya provided ever, so the Himalayan distribution is problematic |
| Reptile | Viperidae | <i>Trimeresurus albolabris</i>      | Genbank           | Widespread including the Himalaya | Widespread including the Himalaya | Combined with other sequences outside the Himalaya                                       |
| Reptile | Viperidae | <i>Trimeresurus erythrurus</i>      | Genbank           | Not in the Himalaya               | Widespread including the Himalaya | No sequences in the Himalaya provided ever, so the Himalayan distribution is problematic |
| Reptile | Viperidae | <i>Trimeresurus medoensis</i>       | <b>This study</b> | Endemic to the Himalaya           | Endemic to the Himalaya           |                                                                                          |

|         |           |                                       |         |                                   |                                   |                                                                                          |
|---------|-----------|---------------------------------------|---------|-----------------------------------|-----------------------------------|------------------------------------------------------------------------------------------|
| Reptile | Viperidae | <i>Trimeresurus popeiorum</i>         | Genbank | Widespread including the Himalaya | Widespread including the Himalaya | Combined with other sequences outside the Himalaya                                       |
| Reptile | Viperidae | <i>Trimeresurus purpureomaculatus</i> | Genbank | Not in the Himalaya               | Widespread including the Himalaya | No sequences in the Himalaya provided ever, so the Himalayan distribution is problematic |
| Reptile | Viperidae | <i>Trimeresurus septentrionalis</i>   | Genbank | Endemic to the Himalaya           | Endemic to the Himalaya           |                                                                                          |
| Reptile | Viperidae | <i>Trimeresurus stejnegeri</i>        | Genbank | Not in the Himalaya               | Widespread including the Himalaya | No sequences in the Himalaya provided ever, so the Himalayan distribution is problematic |



|         |           |                                 |         |                         |                                   |                                                                                          |
|---------|-----------|---------------------------------|---------|-------------------------|-----------------------------------|------------------------------------------------------------------------------------------|
| Reptile | Viperidae | <i>Trimeresurus tibetanus</i>   | Genbank | Endemic to the Himalaya | Endemic to the Himalaya           |                                                                                          |
| Reptile | Viperidae | <i>Trimeresurus yunnanensis</i> | Genbank | Not in the Himalaya     | Widespread including the Himalaya | No sequences in the Himalaya provided ever, so the Himalayan distribution is problematic |

---

## References

1. Xing Y and Ree RH. Uplift-driven diversification in the Hengduan Mountains, a temperate biodiversity hotspot. *Proceedings of the National Academy of Sciences* 2017; **114**: E3444–E34.
2. Sambrook J, Fritsch EF and Maniatis T. *Molecular cloning: a laboratory manual*. New York: Cold spring harbor laboratory press, 1989.
3. Kumar S, Stecher G and Li M *et al.* MEGA X: molecular evolutionary genetics analysis across computing platforms. *Molecular Biology and Evolution* 2018; **35**: 1547–49.
4. Vaidya G, Lohman DJ and Meier R. SequenceMatrix: concatenation software for the fast assembly of multi-gene datasets with character set and codon information. *Cladistics* 2011; **27**: 171–80.
5. Nguyen LT, Schmidt HA and von Haeseler A *et al.* IQ-TREE: a fast and effective stochastic algorithm for estimating maximum-likelihood phylogenies. *Molecular Biology and Evolution* 2014; **32**: 268–74.
6. Trifinopoulos J, Nguyen LT and von Haeseler A *et al.* W-IQ-TREE: a fast online phylogenetic tool for maximum likelihood analysis. *Nucleic Acids Research* 2016; **44**: W232–W5.
7. Kalyaanamoorthy S, Minh BQ and Wong TKF *et al.* ModelFinder: fast model selection for accurate phylogenetic estimates. *Nature Methods* 2017; **14**: 587.
8. Minh BQ, Nguyen MAT and von Haeseler A. Ultrafast approximation for phylogenetic bootstrap. *Molecular Biology and Evolution* 2013; **30**: 1188–95.
9. Hoang DT, Chernomor O and von Haeseler A *et al.* UFBoot2: improving the ultrafast bootstrap approximation. *Molecular Biology and Evolution* 2017; **35**: 518–22.
10. Anisimova M and Gascuel O. Approximate likelihood-ratio test for branches: a fast, accurate, and powerful alternative. *Systematic Biology* 2006; **55**: 539–52.
11. Guindon S, Dufayard JF and Lefort V *et al.* New algorithms and methods to estimate maximum-likelihood phylogenies: assessing the performance of PhyML 3.0. *Systematic Biology* 2010; **59**: 307–21.
12. Wilcox TP, Zwicky DJ and Heath TA *et al.* Phylogenetic relationships of the dwarf boas and a comparison of Bayesian and bootstrap measures of phylogenetic support. *Molecular Phylogenetics and Evolution* 2002; **25**: 361–71.

13. Yang Z. PAML 4: phylogenetic analysis by maximum likelihood. *Molecular Biology and Evolution* 2007; **24**: 1586–91.
14. Feng YJ, Blackburn DC and Liang D *et al.* Phylogenomics reveals rapid, simultaneous diversification of three major clades of Gondwanan frogs at the Cretaceous–Paleogene boundary. *Proceedings of the National Academy of Sciences* 2017; **114**: E5864–E70.
15. Zheng Y and Wiens JJ. Combining phylogenomic and supermatrix approaches, and a time-calibrated phylogeny for squamate reptiles (lizards and snakes) based on 52 genes and 4162 species. *Molecular Phylogenetics and Evolution* 2016; **94**: 537–47.
16. Brown JW and Smith SA. The Past Sure is Tense: On Interpreting Phylogenetic Divergence Time Estimates. *Systematic Biology* 2018; **67**: 340–53.
17. R Core Team. *R: A language and environment for statistical computing*. <https://www.R-project.org>.
18. H. Wickham H. *ggplot2: Elegant Graphics for Data Analysis*. <https://ggplot2.tidyverse.org>.
19. Boos WR and Kuang Z. Dominant control of the South Asian monsoon by orographic insulation versus plateau heating. *Nature* 2010; **463**: 218–23.
20. Ding L, Spicer RA and Yang J *et al.* Quantifying the rise of the Himalaya orogen and implications for the South Asian monsoon. *Geology* 2017; **45**: 215–8.
21. Spicer RA, Tao S and Valdes PJ *et al.* Why the ‘Uplift of the Tibetan Plateau’ is a myth. *National Science Review* 2020; **0**: 1–19.
22. Matzke NJ. Probabilistic historical biogeography: new models for founder event speciation, imperfect detection, and fossils allow improved accuracy and model-testing. *Frontiers of Biogeography* 2013; **5**: 242–8.
23. Yu Y, Harris AJ and Blair C *et al.* RASP (Reconstruct Ancestral State in Phylogenies): a tool for historical biogeography. *Molecular Phylogenetics and Evolution* 2015; **87**: 46–9.
24. Jønsson KA and Holt BG. Islands contribute disproportionately high amounts of evolutionary diversity in passerine birds. *Nature Communications* 2015; **6**: 8538.
25. Klaus S, Morley RJ and Plath M *et al.* Biotic interchange between the Indian subcontinent and mainland Asia through time. *Nature Communications* 2016; **7**: 12132.
26. Székely GJ and Rizzo ML. Hierarchical clustering via joint between-within distances. Extending Ward’s minimum variance method. *Journal of Classification* 2005; **22**: 151–83.

27. Rizzo ML and Székely GJ. DISCO analysis: a nonparametric extension of analysis of variance. *Annals of Applied Probability* 2010; **4**: 1034–55.
28. James NA and Matteson DS. ecp: An R package for nonparametric multiple change point analysis of multivariate data. *Journal of Statistical Software* 2014; **62**: 1–25.
29. Suchard MA, Lemey P and Baele G *et al.* Bayesian phylogenetic and phylodynamic data integration using BEAST 1.10. *Virus Evolution* 2018; **4**: vey016.
30. Lanfear R, Frandsen PB and Wright AM *et al.* PartitionFinder 2: New Methods for Selecting Partitioned Models of Evolution for Molecular and Morphological Phylogenetic Analyses. *Molecular Biology & Evolution* 2016; **34**: 772–3.
31. Rambaut A, Drummond AJ and Xie D *et al.* Posterior summarisation in Bayesian phylogenetics using Tracer 1.7. *Systematic Biology* 2018; **5**: 5.
32. Rambaut A and Drummond AJ. *TreeAnnotator* 1.4.5. <http://beastbioedacuk/TreeAnnotator>.
33. Bossuyt F and Milinkovitch MC. Convergent adaptive radiations in Madagascan and Asian ranid frogs reveal covariation between larval and adult traits. *Proceedings of the National Academy of Sciences* 2000; **97**: 6585–90.
34. Stuart BL, Inger RF and Voris HK. High level of cryptic species diversity revealed by sympatric lineages of Southeast Asian forest frogs. *Biology Letters* 2006; **2**: 470–4.
35. Bossuyt F and Dubois A. A review of the frog genus *Philautus* Gistel, 1848 (Amphibia, Anura, Ranidae, Rhacophorinae). *Zeylanica* 2001; **6**: 1–112.
36. Stuart BL. The phylogenetic problem of *Huia* (Amphibia: Ranidae). *Molecular Phylogenetics and Evolution* 2008; **46**: 49–60.
37. Goebel AM, Donnelly JM and Atz ME. PCR primers and amplification methods for 12S ribosomal DNA, the control region, cytochrome oxidase I, and cytochrome b in bufonids and other frogs, and an overview of PCR primers which have amplified DNA in amphibians successfully. *Molecular Phylogenetic Evolution* 1999; **11**: 163–99.
38. Macey JR, Schulte JA and Larson A *et al.* Phylogenetic relationships of toads in the *Bufo bufo* species group from the eastern escarpment of the Tibetan Plateau: a case of vicariance and dispersal. *Molecular Phylogenetics and Evolution* 1998; **9**: 80–7.

39. Macey JR, Larson A and Ananjeva NB *et al.* Two novel gene orders and the role of light-strand replication in rearrangement of the vertebrate mitochondrial genome. *Molecular Biology and Evolution* 1997; **14**: 91–104.
40. Che J, Chen HM and Yang JX *et al.* Universal COI primers for DNA barcoding amphibians. *Molecular Ecology Resources* 2012; **12**: 247–58.
41. Li R, Chen W and Tu L *et al.* Rivers as barriers for high elevation amphibians: a phylogeographic analysis of the alpine stream frog of the Hengduan Mountains. *Journal of Zoology* 2009; **277**: 309–16.
42. Burbrink FT, Lawson R and Slowinski JB. Mitochondrial DNA phylogeography of the polytypic North American rat snake (*Elaphe obsoleta*): a critique of the subspecies concept. *Evolution* 2000; **54**: 2107–18.
43. Arévalo SK and Davis JW. Sites Mitochondrial-DNA sequence divergence and phylogenetic-relationships among 8 chromosome races of the *Sceloporus grammicus* complex (Phrynosomatidae) in central Mexico. *Systematic Biology* 1994; **43**: 387–418.
44. R Lawson, Slowinski JB and Crother BI *et al.* Phylogeny of the Colubroidea (Serpentes): New evidence from mitochondrial and nuclear genes. *Molecular Phylogenetics and Evolution* 2005; **37**: 581–601.
45. Macey J and Schulte J. Molecular Phylogenetics, tRNA Evolution, and Historical Biogeography in Anguid Lizards and Related Taxonomic Families. *Molecular Phylogenetics and Evolution* 1999; **12**: 250–72.
46. Linkem CW, Diesmos AC and Brown RM. A new species of scincid lizards (Genus: *Sphenomorphus*) from Palawan Island, Philippines. *Herpetologica* 2010; **66**: 67–79.
47. Whiting AS, Bauer AM and Sites JW. Phylogenetic relationships and limb loss in sub-Saharan African scincine lizards (Squamata: Scincidae). *Molecular Phylogenetics and Evolution* 2003; **29**: 582–98.
48. Bauer AM, de Silva A and Greenbaum E *et al.* A new species of day gecko from high elevation in Sri Lanka, with a preliminary phylogeny of Sri Lankan *Cnemaspis* (Reptilia: Squamata: Gekkonidae). *Mitteilungen aus dem Museum für Naturkunde in Berlin. Zoologische Reihe* 2007; **83**: 22–32.

49. Rage JC and Roček Z. Evolution of anuran assemblages in the Tertiary and Quaternary of Europe, in the context of palaeoclimate and palaeogeography. *Amphibia-Reptilia* 2003; **24**: 133–67.
50. Böhme M. The oldest representative of a brown frog [Ranidae] from the Early Miocene of Germany. *Acta Palaeontologica Polonica* 2001; **46**: 119–24.
51. Voorhies M, Holman JA and Xue XX. The Hottell Ranch rhino quarries (basal Ogallala; medial Barstovian), Banner County, Nebraska; Part I; Geologic setting, faunal lists, lower vertebrates. *Rocky Mountain Geology* 1987; **25**: 55–69.
52. Holman JA. Early Miocene anurans from Florida. *Quarterly Journal of the Florida Academy of Sciences* 1965; **28**: 68–82.
53. Holman JA. Additional Miocene anurans from Florida. *Quarterly Journal of the Florida Academy of Sciences* 1967; **30**: 121–40.
54. Hoffstetter R. Un Serpent terrestre dans le Crétacé inférieur du Sahara. A terrestrial snake in the Lower Cretaceous of the Sahara. *Bulletin de la Société Géologique de France* 1960; **7**: 897–902.
55. Colston TJ, Grazziotin FG and Shepard DB *et al.* Molecular systematics and historical biogeography of tree boas (*Corallus* spp.). *Molecular Phylogenetics and Evolution* 2013; **66**: 953–9.
56. Wüster W, Peppin L and Pook CE *et al.* A nesting of vipers: phylogeny and historical biogeography of the Viperidae (Squamata: Serpentes). *Molecular Phylogenetics and Evolution* 2008; **49**: 445–59.
57. Báez AM and Nicoli L. Bufonid toads from the Late Oligocene beds of Salla Bolivia. *Journal of Vertebrate Paleontology* 2004; **24**: 73–9.
58. Sanchíz B. Salientia. In: Wellnhofer P (ed.). *Handbuch der Paläoherpetologie*. Verlag Dr. Friedrich Pfeil, Munich, 1998, 1–275.
59. Roček Z and Rage JC. Tertiary Anura of Africa, Asia, Europe, North America, and Australia. In: Heatwole HF and Carroll RL (eds.). *Amphibian biology*. Chipping Norton, Australia, Surrey Beatty & Sons, 2000, 1334–89.
60. M. Böhme. The Miocene climatic optimum: Evidence from ectothermic vertebrates of Central Europe. *Palaeogeography, Palaeoclimatology, Palaeoecology* 2003, **195**: 389–401.

61. Mahony S, Foley NM and Biju SD *et al.* Evolutionary History of the Asian Horned Frogs (Megophryinae): Integrative Approaches to Timetree Dating in the Absence of a Fossil Record. *Molecular Biology and Evolution* 2017; **34**: 744–71.
62. Estes R. New fossil pelobatid frogs and a review of the genus *Eopelobates*. *Bulletin of the Museum of Comparative Zoology* 1970; **139**: 293–339.
63. Henrici AC, Baez AM and Grande L. *Aerugoamnis paulus*, new genus and new species (Anura: Anomocoela): first reported anuran from the Early Eocene (Wasatchian) Fossil Butte Member of the Green River Formation, Wyoming. *Annals of Carnegie Museum* 2013; **81**: 295–309.
64. Rocek Z, Wuttke M and Gardner JD *et al.* The Euro-American genus *Eopelobates*, and a re-definition of the family Pelobatidae (Amphibia, Anura). *Palaeobiodiversity and Palaeoenvironments* 2014; **94**: 529–67.
65. Gilmore W. Fossil lizards of North America. *Memoirs of the National Academy of Sciences* 1928; **22**: 1–201.
66. Vasilyan D, Böhme M and Klembara J. First record of fossil *Ophisaurus* (Anguimorpha, Anguidae) from Asia. *Journal of Vertebrate Paleontology* 2016; **36**: e1219739.
67. Scarpetta S. The earliest known occurrence of *Elgaria* (Squamata: Anguidae) and a minimum age for crown Gerrhonotinae: Fossils from the Split Rock Formation, Wyoming, USA. *Palaeontologia Electronica* 2018; **21**: 1–8.
68. Townsend TM, Mulcahy DG and Noonan BP *et al.* Phylogeny of iguanian lizards inferred from 29 nuclear loci, and a comparison of concatenated and species-tree approaches for an ancient, rapid radiation. *Molecular Phylogenetics and Evolution* 2011; **61**: 363–80.
69. Yatkola DA. Mid-Miocene lizards from western Nebraska. *Copeia* 1976; **1976**: 645–54.
70. Smith KT. A diverse new assemblage of late Eocene squamates (Reptilia) from the Chadron Formation of North Dakota, U.S.A. *Palaeontologia Electronica* 2006; **9**: 1–44.
71. Iturralde-Vinent MA and MacPhee RDE. Age and paleogeographical origin of Dominican amber. *Science* 1996; **273**: 1850–2.
72. Estes R. The fossil record and early distribution of lizards. In: Rhodin A and Miyata K (eds.). *Advances in Herpetology and Evolutionary Biology. Essays in Honor of Ernest E. Williams*. Museum of Comparative Zoology, 1983, 365–98.

73. Schulte JA and Moreno-Roark F. Live birth among iguanian lizards predates Pliocene–Pleistocene glaciations. *Biology Letters* 2010; **6**: 216–8.
74. Hou LH. New materials of Palaeocene lizards of Anhui. *Certebrata Palasiatica* 1976; **14**: 45–52.
75. Auge M. Revision du lezard *Uromastix* europeus (Reptilia, Lacertilia) de l’ Oligocene français. Analyse fonctionnelle de l’ appareil masticateur de genre *Uromastix* et implications paleoecologiques. *Revue de Paléobiologie* 1988; **7**: 317–25.
76. Covacevich J, Couper P and Molnar RE *et al.* Miocene dragons from Riversleigh: new data on the history of the family Agamidae (Reptilia: Squamata) in Australia. *Memoires of the Queensland Museum* 1990; **29**: 339–60.
77. Conrad JL and Norell MA. A complete Late Cretaceous iguanian (Squamata, Reptilia) from the Gobi and identification of a new iguanian clade. *American Museum Novitates* 2007; **2007**: 1–47.
78. Bauer AM, Böhme W and Weitschat W. An Early Eocene gecko from Baltic amber and its implications for the evolution of gecko adhesion. *Journal of Zoology* 2005; **265**: 327–32.
79. Estes R. A scincoid lizard from the Cretaceous and Paleocene of Montana. *Breviora* 1969; **331**: 1–9.
80. Bryant LJ. *Non-dinosaurian lower vertebrates across the Cretaceous–Tertiary boundary in northeastern Montana*. Berkeley: University of California Press, 1989, 1–107.
81. Krause DW, Evans SE and Gao KQ. First definitive record of Mesozoic lizards from Madagascar. *Journal of Vertebrate Paleontology* 2003; **23**: 842–56.
82. Agarwal I, Bauer AM and Jackman TR *et al.* Insights into Himalayan biogeography from geckos: A molecular phylogeny of *Cyrtodactylus* (Squamata: Gekkonidae). *Molecular Phylogenetics and Evolution* 2014; **80**: 145–55.
83. Heinicke MP, Greenbaum E and Jackman TR *et al.* Phylogeny of a trans-Wallacean radiation (Squamata, Gekkonidae, *Gehyra*) supports a single early colonization of Australia. *Zoologica Scripta* 2011; **40**: 584–602.
84. Arnold EN and Poinar G. A 100 million year old gecko with sophisticated adhesive toe pads, preserved in amber from Myanmar. *Zootaxa* 2008; **1847**: 62–8.
